# Supplementary material
Source: publisher figshare collection journal article supplement (https://tandf.figshare.com/articles/dataset/_/14754195)
Supplement: Supplementary file 1 [file 1]

## Sheet: Table S1
Table S1: NSAF analysis for MS data.
LocusID	L	MW	pI	SL3-WT SpectrumCount	SL3-WT NSAFe5	SL3-WT SequenceCount	SL3-WT Coverage	SL3-MUT SpectrumCount	SL3-MUT NSAFe5	SL3-MUT SequenceCount	SL3-MUT Coverage	Description	Unique
P84103	164	19330	11.6	12	367.718	8	41.5	21	1397.22	10	46.3	Splicing factor, arginine/serine-rich 3 OS=Homo sapiens GN=SFRS3 PE=1 SV=1	U
P09651	372	38747	9.1	27	364.752	22	47	30	879.967	21	47	Heterogeneous nuclear ribonucleoprotein A1 OS=Homo sapiens GN=HNRNPA1 PE=1 SV=5	U
P53999	127	14395	9.6	9	356.136	9	48	11	945.098	9	48.8	Activated RNA polymerase II transcriptional coactivator p15 OS=Homo sapiens GN=SUB1 PE=1 SV=3	U
P22626	353	37430	8.9	21	298.966	19	46.7	25	772.775	21	58.6	Heterogeneous nuclear ribonucleoproteins A2/B1 OS=Homo sapiens GN=HNRNPA2B1 PE=1 SV=2	U
Q14103	355	38434	7.8	20	283.125	18	34.6	30	922.106	23	35.8	Heterogeneous nuclear ribonucleoprotein D0 OS=Homo sapiens GN=HNRNPD PE=1 SV=1	U
P67809	324	35924	9.9	15	232.661	14	49.1	32	1077.69	22	61.4	Nuclease-sensitive element-binding protein 1 OS=Homo sapiens GN=YBX1 PE=1 SV=3	U
P61978	463	50976	5.5	21	227.937	18	40.4	60	1414.03	26	48.4	Heterogeneous nuclear ribonucleoprotein K OS=Homo sapiens GN=HNRNPK PE=1 SV=1	U
Q9Y333	95	10835	6.5	4	211.599	3	32.6	5	574.294	3	32.6	U6 snRNA-associated Sm-like protein LSm2 OS=Homo sapiens GN=LSM2 PE=1 SV=1	U
Q15365	356	37498	7.1	14	197.631	12	54.8	47	1440.57	18	68.3	Poly(rC)-binding protein 1 OS=Homo sapiens GN=PCBP1 PE=1 SV=2	U
P62312	80	9128	9.6	3	188.455	3	36.2	4	545.579	4	45	U6 snRNA-associated Sm-like protein LSm6 OS=Homo sapiens GN=LSM6 PE=1 SV=1	U
Q9BUJ2	856	95739	6.9	29	170.256	26	30.4	40	509.887	30	33.9	Heterogeneous nuclear ribonucleoprotein U-like protein 1 OS=Homo sapiens GN=HNRNPUL1 PE=1 SV=2	U
O60506	623	69603	8.6	18	145.198	17	32.3	34	595.496	24	42.5	Heterogeneous nuclear ribonucleoprotein Q OS=Homo sapiens GN=SYNCRIP PE=1 SV=2	U
P98179	157	17170	8.9	4	128.038	4	28.7	10	695.006	9	40.8	Putative RNA-binding protein 3 OS=Homo sapiens GN=RBM3 PE=1 SV=1	U
P62316	118	13527	9.9	3	127.766	3	33.1	2	184.942	2	16.9	Small nuclear ribonucleoprotein Sm D2 OS=Homo sapiens GN=SNRPD2 PE=1 SV=1	U
Q16629	238	27367	11.8	6	126.693	5	19.7	8	366.776	7	30.7	Splicing factor, arginine/serine-rich 7 OS=Homo sapiens GN=SFRS7 PE=1 SV=1	U
P62306	86	9725	4.7	2	116.872	2	24.4	2	253.758	2	24.4	Small nuclear ribonucleoprotein F OS=Homo sapiens GN=SNRPF PE=1 SV=1	U
Q14011	172	18648	9.5	4	116.872	3	20.9	2	126.879	2	14.5	Cold-inducible RNA-binding protein OS=Homo sapiens GN=CIRBP PE=1 SV=1	U
Q00839	825	90585	6	19	115.738	16	24.8	19	251.297	17	30.3	Heterogeneous nuclear ribonucleoprotein U OS=Homo sapiens GN=HNRNPU PE=1 SV=6	U
Q15366	365	38580	6.8	8	110.147	7	23.6	29	866.948	14	51	Poly(rC)-binding protein 2 OS=Homo sapiens GN=PCBP2 PE=1 SV=1	U
Q9H2U1	1008	114776	7.7	21	104.697	21	24.1	5	54.1249	5	7.9	Probable ATP-dependent RNA helicase DHX36 OS=Homo sapiens GN=DHX36 PE=1 SV=1	U
O43390	633	70943	8.1	13	103.209	13	21.2	23	396.472	20	28.3	Heterogeneous nuclear ribonucleoprotein R OS=Homo sapiens GN=HNRNPR PE=1 SV=1	U
P11940	636	70671	9.5	13	102.722	13	21.7	12	205.879	12	19.3	Polyadenylate-binding protein 1 OS=Homo sapiens GN=PABPC1 PE=1 SV=2	U
Q13247	344	39587	11.4	7	102.263	7	13.4	8	253.758	8	17.4	Splicing factor, arginine/serine-rich 6 OS=Homo sapiens GN=SFRS6 PE=1 SV=2	U
Q8NC51	408	44965	8.6	8	98.5388	8	17.6	4	106.976	4	11.3	Plasminogen activator inhibitor 1 RNA-binding protein OS=Homo sapiens GN=SERBP1 PE=1 SV=2	U
P17844	614	69148	8.9	12	98.2178	12	20.7	8	142.171	8	13.4	Probable ATP-dependent RNA helicase DDX5 OS=Homo sapiens GN=DDX5 PE=1 SV=1	U
P51991	378	39595	9	7	93.0644	7	22.8	5	144.333	5	20.6	Heterogeneous nuclear ribonucleoprotein A3 OS=Homo sapiens GN=HNRNPA3 PE=1 SV=2	U
Q99729	332	36225	8.2	6	90.8219	6	12.3	24	788.789	12	18.7	Heterogeneous nuclear ribonucleoprotein A/B OS=Homo sapiens GN=HNRNPAB PE=1 SV=2	U
P14866	589	64133	8.2	10	85.3222	9	22.4	14	259.359	13	32.8	Heterogeneous nuclear ribonucleoprotein L OS=Homo sapiens GN=HNRNPL PE=1 SV=2	U
P78527	4128	469093	7.1	68	82.784	62	17.2	58	153.312	55	16.2	DNA-dependent protein kinase catalytic subunit OS=Homo sapiens GN=PRKDC PE=1 SV=3	U
Q92499	740	82432	7.2	12	81.4942	11	19.9	11	162.199	11	19.2	ATP-dependent RNA helicase DDX1 OS=Homo sapiens GN=DDX1 PE=1 SV=2	U
P35637	526	53426	9.4	8	76.4331	8	16.5	6	124.467	5	14.6	RNA-binding protein FUS OS=Homo sapiens GN=FUS PE=1 SV=1	U
Q13243	272	31264	11.6	4	73.9041	4	16.5	7	280.813	7	22.8	Splicing factor, arginine/serine-rich 5 OS=Homo sapiens GN=SFRS5 PE=1 SV=1	U
P52272	730	77516	8.7	10	68.8421	10	16.8	4	59.7895	4	7	Heterogeneous nuclear ribonucleoprotein M OS=Homo sapiens GN=HNRNPM PE=1 SV=3	U
Q01130	221	25476	11.9	3	68.2191	3	13.1	5	246.868	5	14.9	Splicing factor, arginine/serine-rich 2 OS=Homo sapiens GN=SFRS2 PE=1 SV=4	U
P52597	415	45672	5.6	5	60.5479	5	12	3	78.8789	3	6.3	Heterogeneous nuclear ribonucleoprotein F OS=Homo sapiens GN=HNRNPF PE=1 SV=3	U
O14979	420	46437	9.6	5	59.8271	5	12.9	16	415.68	12	13.1	Heterogeneous nuclear ribonucleoprotein D-like OS=Homo sapiens GN=HNRPDL PE=1 SV=3	U
P26368	475	53501	9.1	5	52.8998	4	11.6	4	91.8871	4	11.6	Splicing factor U2AF 65 kDa subunit OS=Homo sapiens GN=U2AF2 PE=1 SV=4	U
P46063	649	73457	7.9	6	46.4605	6	10.3	10	168.129	10	23.3	ATP-dependent DNA helicase Q1 OS=Homo sapiens GN=RECQL PE=1 SV=3	U
P08621	437	51557	9.9	4	45.9998	4	8.7	2	49.9386	2	6.2	U1 small nuclear ribonucleoprotein 70 kDa OS=Homo sapiens GN=SNRNP70 PE=1 SV=2	U
P31943	449	49229	6.3	4	44.7704	4	11.6	3	72.9059	3	5.8	Heterogeneous nuclear ribonucleoprotein H OS=Homo sapiens GN=HNRNPH1 PE=1 SV=4	group-32
P55795	449	49264	6.3	4	44.7704	4	12	3	72.9059	3	5.8	Heterogeneous nuclear ribonucleoprotein H2 OS=Homo sapiens GN=HNRNPH2 PE=1 SV=1	group-32
Q07955	248	27745	10.4	2	40.528	2	8.5	13	571.978	11	43.5	Splicing factor, arginine/serine-rich 1 OS=Homo sapiens GN=SFRS1 PE=1 SV=2	U
Q86V81	257	26888	11.2	2	39.1088	2	11.3	5	212.288	4	23.3	THO complex subunit 4 OS=Homo sapiens GN=THOC4 PE=1 SV=3	U
Q96AE4	644	67560	7.6	5	39.0177	5	8.7	57	965.777	32	51.6	Far upstream element-binding protein 1 OS=Homo sapiens GN=FUBP1 PE=1 SV=3	U
P38159	391	42332	10.1	3	38.5586	3	9	2	55.8137	2	5.4	Heterogeneous nuclear ribonucleoprotein G OS=Homo sapiens GN=RBMX PE=1 SV=3	U
Q1KMD3	747	85105	4.9	5	33.6377	5	7.8	6	87.6433	6	11.8	Heterogeneous nuclear ribonucleoprotein U-like protein 2 OS=Homo sapiens GN=HNRNPUL2 PE=1 SV=1	U
Q92945	710	73147	7.3	4	28.3125	4	6.1	47	722.316	29	44.8	Far upstream element-binding protein 2 OS=Homo sapiens GN=KHSRP PE=1 SV=3	U
O43148	476	54844	6.6	2	21.1154	2	5.9	6	137.541	6	17.9	mRNA cap guanine-N7 methyltransferase OS=Homo sapiens GN=RNMT PE=1 SV=1	U
Q05519	484	53542	10.5	2	20.7664	2	5.2	2	45.0892	2	6.2	Splicing factor, arginine/serine-rich 11 OS=Homo sapiens GN=SFRS11 PE=1 SV=1	U
Q09161	790	91839	6.4	3	19.0841	3	3.9	7	96.685	7	9.2	Nuclear cap-binding protein subunit 1 OS=Homo sapiens GN=NCBP1 PE=1 SV=1	U
Q15459	793	88886	5.2	3	19.0119	3	5.3	2	27.5198	2	3.9	Splicing factor 3A subunit 1 OS=Homo sapiens GN=SF3A1 PE=1 SV=1	U
Q14498	530	59380	10.1	2	18.9641	2	5.3	9	185.291	8	20.2	RNA-binding protein 39 OS=Homo sapiens GN=RBM39 PE=1 SV=2	U
Q01844	656	68478	9.3	2	15.3216	2	3.5	2	33.267	2	4.3	RNA-binding protein EWS OS=Homo sapiens GN=EWSR1 PE=1 SV=1	U
Q13435	872	97657	5.7	2	11.5263	2	2.3	3	37.5399	3	6.1	Splicing factor 3B subunit 2 OS=Homo sapiens GN=SF3B2 PE=1 SV=1	U
Q14839	1912	217989	5.9	4	10.5135	4	2.8	3	17.1207	3	1.7	Chromodomain-helicase-DNA-binding protein 4 OS=Homo sapiens GN=CHD4 PE=1 SV=1	U
Q99878	128	13936	10.9	4	154.274	2	12.5	0	0	0	0	Histone H2A type 1-J OS=Homo sapiens GN=HIST1H2AJ PE=1 SV=3	group-26
Q93077	130	14105	11.1	4	154.274	2	12.3	0	0	0	0	Histone H2A type 1-C OS=Homo sapiens GN=HIST1H2AC PE=1 SV=3	group-26
Q71UI9	128	13509	10.6	4	154.274	2	12.5	0	0	0	0	Histone H2A.V OS=Homo sapiens GN=H2AFV PE=1 SV=3	group-26
P0C0S8	130	14091	10.9	4	154.274	2	12.3	0	0	0	0	Histone H2A type 1 OS=Homo sapiens GN=HIST1H2AG PE=1 SV=2	group-26
P0C0S5	128	13553	10.6	4	154.274	2	12.5	0	0	0	0	Histone H2A.Z OS=Homo sapiens GN=H2AFZ PE=1 SV=2	group-26
P16104	143	15145	10.7	4	154.274	2	11.2	0	0	0	0	Histone H2A.x OS=Homo sapiens GN=H2AFX PE=1 SV=2	group-26
Q96QV6	131	14233	10.9	4	154.274	2	12.2	0	0	0	0	Histone H2A type 1-A OS=Homo sapiens GN=HIST1H2AA PE=1 SV=3	group-26
Q6FI13	130	14095	10.9	4	154.274	2	12.3	0	0	0	0	Histone H2A type 2-A OS=Homo sapiens GN=HIST2H2AA3 PE=1 SV=3	group-26
P20671	130	14107	10.9	4	154.274	2	12.3	0	0	0	0	Histone H2A type 1-D OS=Homo sapiens GN=HIST1H2AD PE=1 SV=2	group-26
Q16777	129	13988	10.9	4	154.274	2	12.4	0	0	0	0	Histone H2A type 2-C OS=Homo sapiens GN=HIST2H2AC PE=1 SV=4	group-26
Q7L7L0	130	14121	11.1	4	154.274	2	12.3	0	0	0	0	Histone H2A type 3 OS=Homo sapiens GN=HIST3H2A PE=1 SV=3	group-26
Q9BTM1	129	14019	10.9	4	154.274	2	12.4	0	0	0	0	Histone H2A.J OS=Homo sapiens GN=H2AFJ PE=1 SV=1	group-26
Q96KK5	128	13906	10.9	4	154.274	2	12.5	0	0	0	0	Histone H2A type 1-H OS=Homo sapiens GN=HIST1H2AH PE=1 SV=3	group-26
P04908	130	14135	11.1	4	154.274	2	12.3	0	0	0	0	Histone H2A type 1-B/E OS=Homo sapiens GN=HIST1H2AB PE=1 SV=2	group-26
Q16778	126	13920	10.3	3	119.654	3	16.7	0	0	0	0	Histone H2B type 2-E OS=Homo sapiens GN=HIST2H2BE PE=1 SV=3	group-20
P33778	126	13950	10.3	3	119.654	3	16.7	0	0	0	0	Histone H2B type 1-B OS=Homo sapiens GN=HIST1H2BB PE=1 SV=2	group-20
Q8N257	126	13908	10.3	3	119.654	3	16.7	0	0	0	0	Histone H2B type 3-B OS=Homo sapiens GN=HIST3H2BB PE=1 SV=3	group-20
P06899	126	13904	10.3	3	119.654	3	16.7	0	0	0	0	Histone H2B type 1-J OS=Homo sapiens GN=HIST1H2BJ PE=1 SV=3	group-20
P23527	126	13906	10.3	3	119.654	3	16.7	0	0	0	0	Histone H2B type 1-O OS=Homo sapiens GN=HIST1H2BO PE=1 SV=3	group-20
P16401	226	22580	10.9	5	111.183	3	14.2	0	0	0	0	Histone H1.5 OS=Homo sapiens GN=HIST1H1B PE=1 SV=3	U
P84243	136	15328	11.3	3	110.856	2	13.2	0	0	0	0	Histone H3.3 OS=Homo sapiens GN=H3F3A PE=1 SV=2	group-25
Q71DI3	136	15388	11.3	3	110.856	2	13.2	0	0	0	0	Histone H3.2 OS=Homo sapiens GN=HIST2H3A PE=1 SV=3	group-25
Q16695	136	15508	11.1	3	110.856	2	13.2	0	0	0	0	Histone H3.1t OS=Homo sapiens GN=HIST3H3 PE=1 SV=3	group-25
P68431	136	15404	11.1	3	110.856	2	13.2	0	0	0	0	Histone H3.1 OS=Homo sapiens GN=HIST1H3A PE=1 SV=2	group-25
Q99877	126	13922	10.3	2	79.7695	2	15.9	0	0	0	0	Histone H2B type 1-N OS=Homo sapiens GN=HIST1H2BN PE=1 SV=3	group-21
Q93079	126	13892	10.3	2	79.7695	2	15.9	0	0	0	0	Histone H2B type 1-H OS=Homo sapiens GN=HIST1H2BH PE=1 SV=3	group-21
Q99880	126	13952	10.3	2	79.7695	2	15.9	0	0	0	0	Histone H2B type 1-L OS=Homo sapiens GN=HIST1H2BL PE=1 SV=3	group-21
O60814	126	13890	10.3	2	79.7695	2	15.9	0	0	0	0	Histone H2B type 1-K OS=Homo sapiens GN=HIST1H2BK PE=1 SV=3	group-21
P58876	126	13936	10.3	2	79.7695	2	15.9	0	0	0	0	Histone H2B type 1-D OS=Homo sapiens GN=HIST1H2BD PE=1 SV=2	group-21
P57053	126	13944	10.4	2	79.7695	2	15.9	0	0	0	0	Histone H2B type F-S OS=Homo sapiens GN=H2BFS PE=1 SV=2	group-21
Q99879	126	13989	10.3	2	79.7695	2	15.9	0	0	0	0	Histone H2B type 1-M OS=Homo sapiens GN=HIST1H2BM PE=1 SV=3	group-21
Q5QNW6	126	13920	10.3	2	79.7695	2	15.9	0	0	0	0	Histone H2B type 2-F OS=Homo sapiens GN=HIST2H2BF PE=1 SV=3	group-21
P62807	126	13906	10.3	2	79.7695	2	15.9	0	0	0	0	Histone H2B type 1-C/E/F/G/I OS=Homo sapiens GN=HIST1H2BC PE=1 SV=4	group-21
P07910	306	33670	5.1	4	65.6925	4	11.4	0	0	0	0	Heterogeneous nuclear ribonucleoproteins C1/C2 OS=Homo sapiens GN=HNRNPC PE=1 SV=4	U
O00571	662	73244	7.2	8	60.7308	8	14.5	0	0	0	0	ATP-dependent RNA helicase DDX3X OS=Homo sapiens GN=DDX3X PE=1 SV=3	U
O00148	427	49130	5.7	5	58.8463	5	11.5	0	0	0	0	ATP-dependent RNA helicase DDX39 OS=Homo sapiens GN=DDX39 PE=1 SV=2	U
Q9NY12	217	22348	10.9	2	46.3178	2	9.2	0	0	0	0	H/ACA ribonucleoprotein complex subunit 1 OS=Homo sapiens GN=GAR1 PE=1 SV=1	U
P23246	707	76150	9.4	6	42.649	6	11.7	0	0	0	0	Splicing factor, proline- and glutamine-rich OS=Homo sapiens GN=SFPQ PE=1 SV=2	U
Q08211	1270	140958	6.8	10	39.5707	10	9	0	0	0	0	ATP-dependent RNA helicase A OS=Homo sapiens GN=DHX9 PE=1 SV=4	U
Q13310	644	70783	9.3	5	39.0177	5	8.5	0	0	0	0	Polyadenylate-binding protein 4 OS=Homo sapiens GN=PABPC4 PE=1 SV=1	U
Q92841	650	72372	8.6	5	38.6575	5	9.2	0	0	0	0	Probable ATP-dependent RNA helicase DDX17 OS=Homo sapiens GN=DDX17 PE=1 SV=1	U
Q9NR30	783	87344	9.3	4	25.6729	4	5	0	0	0	0	Nucleolar RNA helicase 2 OS=Homo sapiens GN=DDX21 PE=1 SV=5	U
Q15393	1217	135577	5.3	5	20.647	5	5.3	0	0	0	0	Splicing factor 3B subunit 3 OS=Homo sapiens GN=SF3B3 PE=1 SV=4	U
Q12874	501	58849	5.4	2	20.0618	2	6	0	0	0	0	Splicing factor 3A subunit 3 OS=Homo sapiens GN=SF3A3 PE=1 SV=1	U
Q9UMS4	504	55181	6.6	2	19.9424	2	4.6	0	0	0	0	Pre-mRNA-processing factor 19 OS=Homo sapiens GN=PRPF19 PE=1 SV=1	U
Q15029	972	109436	5	3	15.5107	2	2.3	0	0	0	0	116 kDa U5 small nuclear ribonucleoprotein component OS=Homo sapiens GN=EFTUD2 PE=1 SV=1	U
O75533	1304	145830	7.1	4	15.4156	4	4.1	0	0	0	0	Splicing factor 3B subunit 1 OS=Homo sapiens GN=SF3B1 PE=1 SV=3	U
Q6P2Q9	2335	273599	8.8	5	10.7612	5	2	0	0	0	0	Pre-mRNA-processing-splicing factor 8 OS=Homo sapiens GN=PRPF8 PE=1 SV=2	U
O75643	2136	244505	6.1	4	9.411	4	1.9	0	0	0	0	U5 small nuclear ribonucleoprotein 200 kDa helicase OS=Homo sapiens GN=SNRNP200 PE=1 SV=2	U
P57721	339	35938	8.1	0	0	0	0	19	611.564	6	21.5	Poly(rC)-binding protein 3 OS=Homo sapiens GN=PCBP3 PE=1 SV=1	U
Q9Y580	266	30503	9.6	0	0	0	0	11	451.231	9	35.7	RNA-binding protein 7 OS=Homo sapiens GN=RBM7 PE=1 SV=1	U
P62310	102	11845	4.7	0	0	0	0	4	427.905	3	22.5	U6 snRNA-associated Sm-like protein LSm3 OS=Homo sapiens GN=LSM3 PE=1 SV=2	U
Q9UK45	103	11602	5.3	0	0	0	0	4	423.751	2	15.5	U6 snRNA-associated Sm-like protein LSm7 OS=Homo sapiens GN=LSM7 PE=1 SV=1	U
Q7Z2W4	902	101431	8.4	0	0	0	0	35	423.399	32	42.6	Zinc finger CCCH-type antiviral protein 1 OS=Homo sapiens GN=ZC3HAV1 PE=1 SV=3	U
Q6NZY4	707	78577	4.9	0	0	0	0	26	401.275	23	36.5	Zinc finger CCHC domain-containing protein 8 OS=Homo sapiens GN=ZCCHC8 PE=1 SV=2	U
Q9Y4Z0	139	15350	10	0	0	0	0	5	392.503	5	38.1	U6 snRNA-associated Sm-like protein LSm4 OS=Homo sapiens GN=LSM4 PE=1 SV=1	U
P49458	86	10112	8	0	0	0	0	3	380.637	3	34.9	Signal recognition particle 9 kDa protein OS=Homo sapiens GN=SRP9 PE=1 SV=2	U
Q14671	1186	126473	6.8	0	0	0	0	38	349.612	37	34.8	Pumilio homolog 1 OS=Homo sapiens GN=PUM1 PE=1 SV=3	U
O75534	798	88885	6.2	0	0	0	0	21	287.147	21	29.1	Cold shock domain-containing protein E1 OS=Homo sapiens GN=CSDE1 PE=1 SV=2	U
P83731	157	17779	11.3	0	0	0	0	4	278.002	4	25.5	60S ribosomal protein L24 OS=Homo sapiens GN=RPL24 PE=1 SV=1	U
Q15370	118	13133	4.9	0	0	0	0	3	277.413	3	35.6	Transcription elongation factor B polypeptide 2 OS=Homo sapiens GN=TCEB2 PE=1 SV=1	U
Q15717	326	36092	9.2	0	0	0	0	8	267.769	8	35.9	ELAV-like protein 1 OS=Homo sapiens GN=ELAVL1 PE=1 SV=2	U
Q15056	248	27385	7.2	0	0	0	0	6	263.99	6	25.8	Eukaryotic translation initiation factor 4H OS=Homo sapiens GN=EIF4H PE=1 SV=5	U
Q01085	375	41591	7.8	0	0	0	0	9	261.878	9	32.8	Nucleolysin TIAR OS=Homo sapiens GN=TIAL1 PE=1 SV=1	U
O76071	339	37840	5	0	0	0	0	8	257.501	8	32.7	Probable cytosolic iron-sulfur protein assembly protein CIAO1 OS=Homo sapiens GN=CIAO1 PE=1 SV=1	U
Q9H3K6	86	10117	6.5	0	0	0	0	2	253.758	2	29.1	BolA-like protein 2 OS=Homo sapiens GN=BOLA2 PE=1 SV=1	U
O00425	579	63705	8.9	0	0	0	0	13	244.992	12	24.4	Insulin-like growth factor 2 mRNA-binding protein 3 OS=Homo sapiens GN=IGF2BP3 PE=1 SV=2	U
P63165	101	11557	5.5	0	0	0	0	2	216.071	2	20.8	Small ubiquitin-related modifier 1 OS=Homo sapiens GN=SUMO1 PE=1 SV=1	U
Q96I24	572	61640	8.4	0	0	0	0	11	209.838	10	17.7	Far upstream element-binding protein 3 OS=Homo sapiens GN=FUBP3 PE=1 SV=2	U
Q5RKV6	272	28235	6.3	0	0	0	0	5	200.581	4	23.9	Exosome complex exonuclease MTR3 OS=Homo sapiens GN=EXOSC6 PE=1 SV=1	U
Q96EP5	407	43383	8.6	0	0	0	0	7	187.669	6	24.6	DAZ-associated protein 1 OS=Homo sapiens GN=DAZAP1 PE=1 SV=1	U
Q13868	293	32789	7.5	0	0	0	0	5	186.205	5	21.8	Exosome complex exonuclease RRP4 OS=Homo sapiens GN=EXOSC2 PE=1 SV=2	U
P34896	483	53083	7.7	0	0	0	0	8	180.73	8	20.1	Serine hydroxymethyltransferase, cytosolic OS=Homo sapiens GN=SHMT1 PE=1 SV=1	U
Q9UHX1	559	59876	5.3	0	0	0	0	9	175.679	9	24.5	Poly(U)-binding-splicing factor PUF60 OS=Homo sapiens GN=PUF60 PE=1 SV=1	U
Q9UI30	125	14199	5.3	0	0	0	0	2	174.585	2	20	tRNA methyltransferase 112 homolog OS=Homo sapiens GN=TRMT112 PE=1 SV=1	U
Q96PZ0	661	75035	6.4	0	0	0	0	10	165.077	10	20.1	Pseudouridylate synthase 7 homolog OS=Homo sapiens GN=PUS7 PE=1 SV=2	U
O15116	133	15179	5.2	0	0	0	0	2	164.084	2	30.8	U6 snRNA-associated Sm-like protein LSm1 OS=Homo sapiens GN=LSM1 PE=1 SV=1	U
O43414	337	37238	8.1	0	0	0	0	5	161.893	5	17.2	ERI1 exoribonuclease 3 OS=Homo sapiens GN=ERI3 PE=1 SV=2	U
O43399	206	22238	5.4	0	0	0	0	3	158.907	3	18.4	Tumor protein D54 OS=Homo sapiens GN=TPD52L2 PE=1 SV=2	U
Q16630	551	59210	7.2	0	0	0	0	8	158.426	7	16.3	Cleavage and polyadenylation specificity factor subunit 6 OS=Homo sapiens GN=CPSF6 PE=1 SV=2	U
P07951	284	32851	4.7	0	0	0	0	4	153.684	4	15.8	Tropomyosin beta chain OS=Homo sapiens GN=TPM2 PE=1 SV=1	U
P47813	144	16460	5.2	0	0	0	0	2	151.55	2	14.6	Eukaryotic translation initiation factor 1A, X-chromosomal OS=Homo sapiens GN=EIF1AX PE=1 SV=2	U
Q15024	291	31835	5.2	0	0	0	0	4	149.987	4	18.6	Exosome complex exonuclease RRP42 OS=Homo sapiens GN=EXOSC7 PE=1 SV=2	U
P34096	147	16840	9	0	0	0	0	2	148.457	2	17	Ribonuclease 4 OS=Homo sapiens GN=RNASE4 PE=1 SV=3	U
Q9BXS6	441	49452	9.9	0	0	0	0	6	148.457	5	15	Nucleolar and spindle-associated protein 1 OS=Homo sapiens GN=NUSAP1 PE=1 SV=1	U
Q13242	221	25542	8.6	0	0	0	0	3	148.121	3	14	Splicing factor, arginine/serine-rich 9 OS=Homo sapiens GN=SFRS9 PE=1 SV=1	U
Q9Y6H1	151	15513	9.2	0	0	0	0	2	144.524	2	15.2	Coiled-coil-helix-coiled-coil-helix domain-containing protein 2, mitochondrial OS=Homo sapiens GN=CHCHD2 PE=1 SV=1	U
Q9UHV9	154	16648	6.6	0	0	0	0	2	141.709	2	12.3	Prefoldin subunit 2 OS=Homo sapiens GN=PFDN2 PE=1 SV=1	U
Q9Y2L1	958	109003	7.1	0	0	0	0	12	136.68	12	18.5	Exosome complex exonuclease RRP44 OS=Homo sapiens GN=DIS3 PE=1 SV=2	U
Q8IYB7	885	99210	6	0	0	0	0	11	135.624	11	12.7	DIS3-like exonuclease 2 OS=Homo sapiens GN=DIS3L2 PE=1 SV=3	U
Q9H2H8	161	18155	6.8	0	0	0	0	2	135.548	2	15.5	Peptidyl-prolyl cis-trans isomerase-like 3 OS=Homo sapiens GN=PPIL3 PE=1 SV=1	U
Q92879	486	52063	8.5	0	0	0	0	6	134.711	6	14.4	CUGBP Elav-like family member 1 OS=Homo sapiens GN=CELF1 PE=1 SV=2	U
Q9Y3C6	166	18237	8	0	0	0	0	2	131.465	2	14.5	Peptidyl-prolyl cis-trans isomerase-like 1 OS=Homo sapiens GN=PPIL1 PE=1 SV=1	U
Q8IV48	349	40064	6.7	0	0	0	0	4	125.061	4	13.5	3'-5' exoribonuclease 1 OS=Homo sapiens GN=ERI1 PE=1 SV=3	U
P15927	270	29247	6.1	0	0	0	0	3	121.24	3	20.7	Replication protein A 32 kDa subunit OS=Homo sapiens GN=RPA2 PE=1 SV=1	U
Q96B26	276	30040	5.3	0	0	0	0	3	118.604	3	12	Exosome complex exonuclease RRP43 OS=Homo sapiens GN=EXOSC8 PE=1 SV=1	U
P31483	386	42963	7.8	0	0	0	0	4	113.073	4	11.1	Nucleolysin TIA-1 isoform p40 OS=Homo sapiens GN=TIA1 PE=1 SV=3	U
P31350	389	44878	5.4	0	0	0	0	4	112.201	4	14.1	Ribonucleoside-diphosphate reductase subunit M2 OS=Homo sapiens GN=RRM2 PE=1 SV=1	U
Q08170	494	56678	11.5	0	0	0	0	5	110.441	5	8.1	Splicing factor, arginine/serine-rich 4 OS=Homo sapiens GN=SFRS4 PE=1 SV=2	U
Q9BUL9	199	20632	9.6	0	0	0	0	2	109.664	2	12.1	Ribonuclease P protein subunit p25 OS=Homo sapiens GN=RPP25 PE=1 SV=1	U
O15347	200	22980	8.4	0	0	0	0	2	109.116	2	14.5	High mobility group protein B3 OS=Homo sapiens GN=HMGB3 PE=1 SV=4	U
Q9GZS3	305	33581	5.5	0	0	0	0	3	107.327	3	14.4	WD repeat-containing protein 61 OS=Homo sapiens GN=WDR61 PE=1 SV=1	U
Q86TB9	770	86850	6.7	0	0	0	0	7	99.1962	7	12.1	Protein PAT1 homolog 1 OS=Homo sapiens GN=PATL1 PE=1 SV=2	U
O95218	330	37404	10	0	0	0	0	3	99.1962	3	11.8	Zinc finger Ran-binding domain-containing protein 2 OS=Homo sapiens GN=ZRANB2 PE=1 SV=2	U
Q9NSI2	230	25456	11.1	0	0	0	0	2	94.8834	2	8.3	Uncharacterized protein C21orf70 OS=Homo sapiens GN=C21orf70 PE=1 SV=2	U
A0AV96	593	64067	7.7	0	0	0	0	5	92.0033	5	10.1	RNA-binding protein 47 OS=Homo sapiens GN=RBM47 PE=1 SV=1	U
P28072	239	25358	4.9	0	0	0	0	2	91.3104	2	8.4	Proteasome subunit beta type-6 OS=Homo sapiens GN=PSMB6 PE=1 SV=4	U
Q01081	240	27872	8.8	0	0	0	0	2	90.9299	2	10.8	Splicing factor U2AF 35 kDa subunit OS=Homo sapiens GN=U2AF1 PE=1 SV=3	U
P28340	1107	123631	7	0	0	0	0	9	88.7121	8	8.3	DNA polymerase delta catalytic subunit OS=Homo sapiens GN=POLD1 PE=1 SV=2	U
Q8NDH3	523	55861	6.9	0	0	0	0	4	83.4538	4	10.3	Probable aminopeptidase NPEPL1 OS=Homo sapiens GN=NPEPL1 PE=1 SV=3	U
O43143	795	90933	7.5	0	0	0	0	6	82.3516	6	8.2	Putative pre-mRNA-splicing factor ATP-dependent RNA helicase DHX15 OS=Homo sapiens GN=DHX15 PE=1 SV=2	U
P10155	538	60671	8	0	0	0	0	4	81.127	4	10.4	60 kDa SS-A/Ro ribonucleoprotein OS=Homo sapiens GN=TROVE2 PE=1 SV=2	U
Q07666	443	48227	8.7	0	0	0	0	3	73.8934	3	7.2	KH domain-containing, RNA-binding, signal transduction-associated protein 1 OS=Homo sapiens GN=KHDRBS1 PE=1 SV=1	U
Q92804	592	61830	8	0	0	0	0	4	73.7269	3	5.2	TATA-binding protein-associated factor 2N OS=Homo sapiens GN=TAF15 PE=1 SV=1	U
Q9UNP9	301	33431	5.6	0	0	0	0	2	72.5022	2	12.3	Peptidyl-prolyl cis-trans isomerase E OS=Homo sapiens GN=PPIE PE=1 SV=1	U
Q86U42	306	32749	5.1	0	0	0	0	2	71.3176	2	6.9	Polyadenylate-binding protein 2 OS=Homo sapiens GN=PABPN1 PE=1 SV=3	U
P60510	307	35080	5.1	0	0	0	0	2	71.0853	2	7.5	Serine/threonine-protein phosphatase 4 catalytic subunit OS=Homo sapiens GN=PPP4C PE=1 SV=1	U
Q6UXN9	313	35079	7.7	0	0	0	0	2	69.7226	2	6.7	WD repeat-containing protein 82 OS=Homo sapiens GN=WDR82 PE=1 SV=1	U
P49321	788	85238	4.3	0	0	0	0	5	69.236	5	10	Nuclear autoantigenic sperm protein OS=Homo sapiens GN=NASP PE=1 SV=2	U
Q15293	331	38890	5	0	0	0	0	2	65.931	2	6.9	Reticulocalbin-1 OS=Homo sapiens GN=RCN1 PE=1 SV=1	U
Q9ULR0	331	37566	5.8	0	0	0	0	2	65.931	2	8.2	Pre-mRNA-splicing factor ISY1 homolog OS=Homo sapiens GN=ISY1 PE=1 SV=2	U
Q8TB72	1066	114216	7.1	0	0	0	0	6	61.4161	6	6	Pumilio homolog 2 OS=Homo sapiens GN=PUM2 PE=1 SV=2	U
O00303	357	37564	5.4	0	0	0	0	2	61.1293	2	5	Eukaryotic translation initiation factor 3 subunit F OS=Homo sapiens GN=EIF3F PE=1 SV=1	U
O94992	359	40623	4.9	0	0	0	0	2	60.7888	2	7.8	Protein HEXIM1 OS=Homo sapiens GN=HEXIM1 PE=1 SV=1	U
Q13619	759	87680	8.1	0	0	0	0	4	57.5051	4	6.6	Cullin-4A OS=Homo sapiens GN=CUL4A PE=1 SV=3	U
Q9NZI8	577	63457	9.2	0	0	0	0	3	56.7327	2	4.5	Insulin-like growth factor 2 mRNA-binding protein 1 OS=Homo sapiens GN=IGF2BP1 PE=1 SV=1	U
Q9BY77	421	46089	10	0	0	0	0	2	51.8365	2	7.1	Polymerase delta-interacting protein 3 OS=Homo sapiens GN=POLDIP3 PE=1 SV=2	U
Q15637	639	68330	9	0	0	0	0	3	51.2281	3	8.6	Splicing factor 1 OS=Homo sapiens GN=SF1 PE=1 SV=4	U
Q06265	439	48949	5.3	0	0	0	0	2	49.7111	2	4.8	Exosome complex exonuclease RRP45 OS=Homo sapiens GN=EXOSC9 PE=1 SV=3	U
Q9UMR2	479	53927	6.3	0	0	0	0	2	45.6075	2	4.8	ATP-dependent RNA helicase DDX19B OS=Homo sapiens GN=DDX19B PE=1 SV=1	group-34
Q9NUU7	478	53975	6.6	0	0	0	0	2	45.6075	2	4.8	ATP-dependent RNA helicase DDX19A OS=Homo sapiens GN=DDX19A PE=1 SV=1	group-34
Q5VYS8	1495	171228	6.8	0	0	0	0	6	43.7923	6	5.9	Terminal uridylyltransferase 7 OS=Homo sapiens GN=ZCCHC6 PE=1 SV=1	U
P08651	508	55675	8.4	0	0	0	0	2	42.959	2	4.7	Nuclear factor 1 C-type OS=Homo sapiens GN=NFIC PE=1 SV=2	U
Q8WVV9	542	60083	7.7	0	0	0	0	2	40.2642	2	5	Heterogeneous nuclear ribonucleoprotein L-like OS=Homo sapiens GN=HNRPLL PE=1 SV=1	U
Q96JP5	570	63445	7.4	0	0	0	0	2	38.2863	2	6.5	Zinc finger protein 91 homolog OS=Homo sapiens GN=ZFP91 PE=1 SV=1	U
Q8WXI9	593	65261	9.7	0	0	0	0	2	36.8013	2	4.7	Transcriptional repressor p66-beta OS=Homo sapiens GN=GATAD2B PE=1 SV=1	U
P43246	934	104743	5.8	0	0	0	0	3	35.0479	3	3.4	DNA mismatch repair protein Msh2 OS=Homo sapiens GN=MSH2 PE=1 SV=1	U
Q93009	1102	128302	5.6	0	0	0	0	3	29.7049	3	3.4	Ubiquitin carboxyl-terminal hydrolase 7 OS=Homo sapiens GN=USP7 PE=1 SV=2	U
P49790	1475	153938	8.7	0	0	0	0	4	29.5907	4	3.7	Nuclear pore complex protein Nup153 OS=Homo sapiens GN=NUP153 PE=1 SV=2	U
O60306	1485	171294	6.4	0	0	0	0	4	29.3915	4	3.3	Intron-binding protein aquarius OS=Homo sapiens GN=AQR PE=1 SV=4	U
Q9NZB2	1118	121888	8.9	0	0	0	0	3	29.2798	3	3.6	Constitutive coactivator of PPAR-gamma-like protein 1 OS=Homo sapiens GN=FAM120A PE=1 SV=2	U
P47712	749	85211	5.4	0	0	0	0	2	29.1364	2	2.8	Cytosolic phospholipase A2 OS=Homo sapiens GN=PLA2G4A PE=1 SV=1	U
Q01780	885	100831	8.5	0	0	0	0	2	24.659	2	3.1	Exosome component 10 OS=Homo sapiens GN=EXOSC10 PE=1 SV=2	U
P51532	1647	184644	7.9	0	0	0	0	2	13.2503	2	1.5	Transcription activator BRG1 OS=Homo sapiens GN=SMARCA4 PE=1 SV=2	U
P51610	2035	208730	7.5	0	0	0	0	2	10.7239	2	1.4	Host cell factor 1 OS=Homo sapiens GN=HCFC1 PE=1 SV=2	U
Q9UQ35	2752	299616	12.1	0	0	0	0	2	7.92993	2	1.2	Serine/arginine repetitive matrix protein 2 OS=Homo sapiens GN=SRRM2 PE=1 SV=2	U

## Sheet: Table S2
Table S2: Spliceosomal proteins identified in the wildtype and mutant U1-SL3 complex.
WT only	WT and Mutant	Mutant only
DDX39B (O00148)
DDX17 (Q92841)
SF3B3 (Q15393)
SF3A3 (Q12874)
Prp19 (Q9UMS4)
U5-116k (Q15029)
SF3B1 (O75533)
Prp8 (Q6P2Q9)
U5-200k (O75643)
	LSm2 (Q9Y333)
	LSm6 (P62312)
	SmD2 (P62316)
	SmF (P62306)
	DDX5 (P17844)
	U2AF2 (P26368)
	U1-70k (P08621)
	SF3B1 (Q15459)
	SF3B2 (Q13435)
		LSm3 (P62310)
		LSm7 (Q9UK45)
		LSm4 (Q9Y4Z0)
		LSm1 (O15116)
		U2AF1 (Q01081)
		ISY1 (Q9ULR0)
		SF1 (Q15637)
		Aquarius (O60306)
		SF1 (Q15637)
		SRRM2 (Q9UQ35)

## Sheet: Table S3
Table S3: List of peptides for proteins identified by MS analysis of the U1-SL3/WT complex.
DTASelect v2.1.3
/home/ip2_data/jwohl/Sharma_Shalini/2016_11_16_hjk_Sharma_Shalini_SL3_wt_2016_11_17_04_4314/search/projects2016_11_17_04_7527
/ip2_data/jwohl/database///Uniprot_Human_with_streptavidin_appended_06-20-2014_reversed.fasta
ProLuCID 1.4.2 in SQT format.
-p 2 -y 2 --trypstat --fp .01 --extra --mass --pI -DM 7 --DB --dm -t 1 --brief --quiet
TRUE	Use criteria
0	Minimum peptide probability
0.01	Peptide global false discovery rate
0	Minimum protein probability
1	Protein false discovery rate
1	Minimum charge state
50	Maximum charge state
-1	Minimum ion proportion
10000	Maximum Sp rank
-1	Minimum Sp score
7	Maximum mass deviation (ppm)
TRUE	Define delta mass with respect to nearest isotope
Include	Modified peptide inclusion
Full	Tryptic status requirement
FALSE	Multiple, ambiguous IDs allowed
Ignore	Peptide validation handling
Salt step	Purge duplicate peptides by protein
FALSE	Include only loci with unique peptide
TRUE	Remove subset proteins
Ignore	Locus validation handling
0	Minimum modified peptides per locus
2	Minimum peptides per locus
Locus	Sequence Count	Spectrum Count	Sequence Coverage	Length	MolWt	pI	Validation Status	NSAF	EMPAI	Descriptive Name	HRedundancy	LRedundancy	MRedundancy
Unique	FileName	XCorr	DeltCN	Conf%	M+H+	CalcM+H+	PPM	TotalIntensity	SpR	Prob Score	pI	IonProportion	Redundancy	Sequence
P05387	7	9	0.913	115	11665	4.5	U	0.00391099	7.18465	60S acidic ribosomal protein P2 OS=Homo sapiens GN=RPLP2 PE=1 SV=1	0	9	0
*	2016-11-16-hjk-Sharma-Shalini-SL3-wt.28995.28995.2	5.4234	0.7437	100	1868.97	1868.98	-1	2280026	1	17.9382	8.64	72.7	2	R.YVASYLLAALGGNSSPSAK.D
*	2016-11-16-hjk-Sharma-Shalini-SL3-wt.17253.17253.2	5.663	0.5711	100	1772.9	1772.9	-0.9	4.33841e+06	1	10.9234	4.25	85.7	1	K.ILDSVGIEADDDRLNK.V
*	2016-11-16-hjk-Sharma-Shalini-SL3-wt.17233.17233.3	3.1732	0.4618	100	1772.9	1772.9	-0.3	2.67731e+06	1	8.94441	4.25	21.8	1	K.ILDSVGIEADDDRLNK.V
*	2016-11-16-hjk-Sharma-Shalini-SL3-wt.8266.8266.2	1.4414	0.3455	99.1	859.488	859.488	-0.2	2.8601e+06	1	6.07897	6.56	61.5	1	K.VISELNGK.N
*	2016-11-16-hjk-Sharma-Shalini-SL3-wt.25177.25177.2	3.1047	0.4337	100	1256.68	1256.68	0	1.68467e+06	1	9.77644	4.46	77.3	2	K.NIEDVIAQGIGK.L
*	2016-11-16-hjk-Sharma-Shalini-SL3-wt.17523.17523.2	6.598	0.7081	100	2774.43	2774.43	-1.1	3.14878e+06	1	18.0167	4.46	60.9	1	K.LASVPAGGAVAVSAAPGSAAPAAGSAPAAAEEK.K
	2016-11-16-hjk-Sharma-Shalini-SL3-wt.27528.27528.2	3.704	0.7619	100	1949.76	1949.76	-0.7	943600	1	8.3698	3.64	51.7	1	K.KEESEESDDDMGFGLFD.-
P51149	12	13	0.72	207	23490	6.7	U	0.00313845	4.24808	Ras-related protein Rab-7a OS=Homo sapiens GN=RAB7A PE=1 SV=1	0	13	0
*	2016-11-16-hjk-Sharma-Shalini-SL3-wt.17415.17415.2	1.6259	0.4482	99.7	1057.62	1057.63	-0.5	8232771	1	8.01012	6.56	57.9	1	K.VIILGDSGVGK.T
*	2016-11-16-hjk-Sharma-Shalini-SL3-wt.14912.14912.2	3.2621	0.5519	100	1197.59	1197.59	-1	3.50273e+06	1	9.5753	8.8	72.2	1	K.TSLMNQYVNK.K
*	2016-11-16-hjk-Sharma-Shalini-SL3-wt.20447.20447.2	1.7212	0.331	99.5	1036.57	1036.57	0.2	4261541	1	6.68714	6.56	60	1	K.ATIGADFLTK.E
*	2016-11-16-hjk-Sharma-Shalini-SL3-wt.24325.24325.2	4.0328	0.493	100	1647.81	1647.82	-3.3	3.29579e+06	1	11.4197	4.46	70.8	1	R.LVTMQIWDTAGQER.F
*	2016-11-16-hjk-Sharma-Shalini-SL3-wt.23099.23099.2	2.4434	0.4066	100	1187.62	1187.62	0.1	5.72545e+06	1	9.6084	9.08	55.6	1	R.FQSLGVAFYR.G
*	2016-11-16-hjk-Sharma-Shalini-SL3-wt.27789.27789.2	3.8834	0.6645	100	2013.93	2013.94	-6.4	1.38137e+06	1	12.4382	4.46	67.9	1	R.GADCCVLVFDVTAPNTFK.T
*	2016-11-16-hjk-Sharma-Shalini-SL3-wt.25387.25387.3	4.532	0.5654	100	1933.98	1933.98	0.1	1.23232e+06	1	11.4593	4.72	44.6	1	K.TLDSWRDEFLIQASPR.D
*	2016-11-16-hjk-Sharma-Shalini-SL3-wt.28346.28346.2	4.0658	0.5671	100	1475.75	1475.75	-0.2	837436	1	13.0845	4.46	62.5	2	R.DPENFPFVVLGNK.I
*	2016-11-16-hjk-Sharma-Shalini-SL3-wt.18018.18018.2	2.4463	0.5015	100	1283.63	1283.63	1.2	3.64614e+06	1	10.2669	6.56	61.1	1	K.NNIPYFETSAK.E
*	2016-11-16-hjk-Sharma-Shalini-SL3-wt.27602.27602.2	4.3258	0.5574	100	1589.83	1589.83	-0.5	3027139	1	12.6202	4.46	66.7	1	K.EAINVEQAFQTIAR.N
*	2016-11-16-hjk-Sharma-Shalini-SL3-wt.25316.25316.2	5.4383	0.603	100	1964.95	1964.95	-1	1.71131e+06	1	11.9311	3.86	71.4	1	K.QETEVELYNEFPEPIK.L
*	2016-11-16-hjk-Sharma-Shalini-SL3-wt.24406.24406.2	2.2455	0.4332	99.3	2706.31	2706.33	-4.5	1.71657e+06	9	6.7968	4.28	9.4	1	K.QETEVELYNEFPEPIKLDKNDR.A
P02533	48	101	0.718	472	51561	5.2	U	0.0106935	4.22396	Keratin, type I cytoskeletal 14 OS=Homo sapiens GN=KRT14 PE=1 SV=4	0	101	0
	2016-11-16-hjk-Sharma-Shalini-SL3-wt.6371.6371.2	2.3495	0.4775	100	1002.46	1002.46	-0.4	12448614	1	8.65429	9.08	68.8	1	R.QFTSSSSMK.G
	2016-11-16-hjk-Sharma-Shalini-SL3-wt.8681.8681.2	2.7961	0.6183	100	1279.58	1278.59	-4	1.4557e+06	1	9.92601	8.26	55.6	2	K.GSCGIGGGIGGGSSR.I
	2016-11-16-hjk-Sharma-Shalini-SL3-wt.10472.10472.2	2.8757	0.3642	100	1106.56	1106.56	-1.8	3.67049e+06	1	10.4344	8.26	70	1	R.ISSVLAGGSCR.A
*	2016-11-16-hjk-Sharma-Shalini-SL3-wt.12164.12164.2	3.9699	0.7556	100	1425.7	1425.7	-1.2	338696320	1	20.6608	9.08	69.2	4	R.APSTYGGGLSVSSSR.F
	2016-11-16-hjk-Sharma-Shalini-SL3-wt.10093.10093.2	2.5183	0.4443	100	1090.53	1090.53	-0.4	28081492	1	8.28659	6.56	60	2	K.VTMQNLNDR.L
	2016-11-16-hjk-Sharma-Shalini-SL3-wt.24561.24561.3	3.7045	0.4332	100	1880.95	1880.95	-0.3	2.7686e+06	1	7.08718	6.56	34.6	1	K.VTMQNLNDRLASYLDK.V
	2016-11-16-hjk-Sharma-Shalini-SL3-wt.10609.10609.2	2.1096	0.4285	100	809.44	809.44	-0.2	24963616	1	8.72025	6.56	75	2	R.LASYLDK.V
	2016-11-16-hjk-Sharma-Shalini-SL3-wt.14825.14825.2	4.6787	0.4935	100	1556.83	1556.83	-1.6	4342990	1	8.22765	4.4	92	1	K.VRALEEANADLEVK.I
	2016-11-16-hjk-Sharma-Shalini-SL3-wt.14819.14819.3	3.1517	0.4209	100	1556.83	1556.83	-0.6	5726289	1	9.01408	4.4	45	1	K.VRALEEANADLEVK.I
	2016-11-16-hjk-Sharma-Shalini-SL3-wt.14497.14497.2	3.4878	0.5206	100	1301.66	1301.66	-1	15943072	1	11.876	3.96	84.2	11	R.ALEEANADLEVK.I
	2016-11-16-hjk-Sharma-Shalini-SL3-wt.10511.10511.2	2.6962	0.4477	100	1036.53	1036.53	-0.7	34279848	1	8.05426	9.08	90.9	2	K.IRDWYQR.Q
*	2016-11-16-hjk-Sharma-Shalini-SL3-wt.2853.2853.2	2.0242	0.1543	99.2	841.488	841.489	-0.8	10024610	1	4.60123	9.08	63.6	1	R.QRPAEIK.D
*	2016-11-16-hjk-Sharma-Shalini-SL3-wt.27137.27137.2	6.7823	0.6951	100	2054.12	2054.12	0.5	5172927	1	15.1459	4.46	78.8	3	K.ILTATVDNANVLLQIDNAR.L
	2016-11-16-hjk-Sharma-Shalini-SL3-wt.11725.11725.2	2.0668	0.4286	100	807.399	807.4	-0.3	32583916	1	11.6816	4.46	66.7	4	R.LAADDFR.T
*	2016-11-16-hjk-Sharma-Shalini-SL3-wt.13068.13068.2	1.9375	0.4666	99.9	1266.67	1266.67	-1.3	14103426	1	10.2241	6.56	47.1	1	R.TKYETELNLR.M
*	2016-11-16-hjk-Sharma-Shalini-SL3-wt.15397.15397.2	1.4182	0.434	99.6	1037.53	1037.53	-0.1	4.77565e+06	1	8.61037	4.46	57.1	1	K.YETELNLR.M
	2016-11-16-hjk-Sharma-Shalini-SL3-wt.19915.19915.2	3.075	0.5695	100	1204.6	1204.6	-0.3	6.90017e+06	1	9.88782	4.46	65	1	R.MSVEADINGLR.R
	2016-11-16-hjk-Sharma-Shalini-SL3-wt.17191.17191.2	2.4049	0.4477	100	1360.7	1360.7	-0.9	17659412	1	8.23932	6.56	45.5	1	R.MSVEADINGLRR.V
	2016-11-16-hjk-Sharma-Shalini-SL3-wt.17883.17883.2	2.279	0.3388	99.9	1185.69	1185.69	-0.8	15343759	1	5.64737	6.56	72.2	1	R.RVLDELTLAR.A
	2016-11-16-hjk-Sharma-Shalini-SL3-wt.19833.19833.2	2.4618	0.5432	100	1029.59	1029.59	-0.2	77253976	1	9.38874	4.46	66.7	2	R.VLDELTLAR.A
*	2016-11-16-hjk-Sharma-Shalini-SL3-wt.23476.23476.2	3.5141	0.6459	100	1276.64	1276.65	-2.7	11588418	1	11.8886	4.14	72.2	3	R.ADLEMQIESLK.E
	2016-11-16-hjk-Sharma-Shalini-SL3-wt.10268.10268.2	2.8633	0.4618	100	993.561	993.561	-0.7	4.95664e+06	1	7.09129	6.56	85.7	2	K.EELAYLKK.N
	2016-11-16-hjk-Sharma-Shalini-SL3-wt.6149.6149.3	2.8759	0.4866	100	1370.65	1370.65	0.4	9927124	1	8.79846	5.8	44.7	1	K.KNHEEEMNALR.G
	2016-11-16-hjk-Sharma-Shalini-SL3-wt.7708.7708.2	2.3213	0.6378	100	1242.55	1242.55	-0.8	3.75086e+06	1	12.4716	4.72	87.5	2	K.NHEEEMNALR.G
	2016-11-16-hjk-Sharma-Shalini-SL3-wt.7761.7761.3	2.0607	0.5308	100	1242.55	1242.55	-0.1	4.31786e+06	1	9.47601	4.72	35.7	1	K.NHEEEMNALR.G
*	2016-11-16-hjk-Sharma-Shalini-SL3-wt.21616.21616.2	6.8121	0.7195	100	2085.99	2085.99	0	3.39066e+06	1	21.3823	3.96	85.7	5	R.GQVGGDVNVEMDAAPGVDLSR.I
	2016-11-16-hjk-Sharma-Shalini-SL3-wt.11206.11206.2	4.6285	0.4318	100	1438.7	1438.7	-0.7	4.31253e+06	1	8.9756	4.72	85	2	R.ILNEMRDQYEK.M
*	2016-11-16-hjk-Sharma-Shalini-SL3-wt.21527.21527.2	4.4926	0.5729	100	1300.62	1300.62	0.5	1.37404e+06	1	10.5021	4.72	83.3	1	R.KDAEEWFFTK.T
*	2016-11-16-hjk-Sharma-Shalini-SL3-wt.25987.25987.2	2.7084	0.6086	100	1172.52	1172.53	-2	9811757	1	12.8084	4.14	68.8	4	K.DAEEWFFTK.T
	2016-11-16-hjk-Sharma-Shalini-SL3-wt.14364.14364.2	6.6239	0.6892	100	2104.05	2104.05	-0.6	63752668	1	14.8483	4.4	80.6	1	K.TEELNREVATNSELVQSGK.S
	2016-11-16-hjk-Sharma-Shalini-SL3-wt.14374.14374.3	5.804	0.7021	100	2104.05	2104.05	0.3	212384384	1	15.1939	4.4	47.4	1	K.TEELNREVATNSELVQSGK.S
	2016-11-16-hjk-Sharma-Shalini-SL3-wt.9539.9539.2	3.7788	0.5947	100	1361.69	1361.69	-1.1	972136	1	13.8567	4.46	65.2	3	R.EVATNSELVQSGK.S
	2016-11-16-hjk-Sharma-Shalini-SL3-wt.18446.18446.4	3.3187	0.3457	99.8	2332.21	2332.21	-1.7	1.6457e+06	1	6.10301	4.89	15.7	1	R.EVATNSELVQSGKSEISELRR.T
*	2016-11-16-hjk-Sharma-Shalini-SL3-wt.28569.28569.2	5.7703	0.601	100	1892.95	1892.95	0.2	1.66623e+06	1	13.1147	4.46	74.1	1	R.TMQNLEIELQSQLSMK.A
	2016-11-16-hjk-Sharma-Shalini-SL3-wt.13951.13951.2	3.345	0.583	100	1220.6	1220.6	-0.1	4619422	1	10.5168	4.14	73.7	2	K.ASLENSLEETK.G
	2016-11-16-hjk-Sharma-Shalini-SL3-wt.6432.6432.2	4.1481	0.5768	100	1486.59	1486.59	-3.4	6.66164e+06	1	8.70761	4.14	77.8	1	R.CEMEQQNQEYK.I
	2016-11-16-hjk-Sharma-Shalini-SL3-wt.15673.15673.2	4.6035	0.6534	100	1379.73	1379.73	-1.2	446497376	1	12.9516	6.56	89.5	1	K.TRLEQEIATYR.R
	2016-11-16-hjk-Sharma-Shalini-SL3-wt.15676.15676.3	3.429	0.4994	100	1379.73	1379.73	-0.8	93191712	1	9.6946	6.56	44.4	1	K.TRLEQEIATYR.R
	2016-11-16-hjk-Sharma-Shalini-SL3-wt.13242.13242.3	2.7961	0.4028	99.9	1535.83	1535.83	-1.1	74798880	1	8.46969	9.08	46.3	1	K.TRLEQEIATYRR.L
	2016-11-16-hjk-Sharma-Shalini-SL3-wt.12311.12311.2	2.1794	0.3689	99.9	1122.58	1122.58	-0.4	24402740	1	6.40228	4.46	68.8	1	R.LEQEIATYR.R
	2016-11-16-hjk-Sharma-Shalini-SL3-wt.9416.9416.2	2.2624	0.09	99.1	1278.68	1278.68	-0.1	4222383	1	4.37281	6.56	55.6	1	R.LEQEIATYRR.L
	2016-11-16-hjk-Sharma-Shalini-SL3-wt.9403.9403.3	2.2154	0.345	99.9	1278.68	1278.68	-0.2	2.23659e+06	1	5.5097	6.56	38.7	1	R.LEQEIATYRR.L
*	2016-11-16-hjk-Sharma-Shalini-SL3-wt.13596.13596.3	5.4676	0.6959	100	2465.16	2465.16	-3.2	8932192	1	15.2959	5.8	37.8	1	R.RLLEGEDAHLSSSQFSSGSQSSR.D
*	2016-11-16-hjk-Sharma-Shalini-SL3-wt.13594.13594.4	3.5491	0.6112	100	2465.17	2465.16	0.3	6.11961e+06	1	10.3897	5.8	21.9	1	R.RLLEGEDAHLSSSQFSSGSQSSR.D
*	2016-11-16-hjk-Sharma-Shalini-SL3-wt.14923.14923.2	6.9009	0.7853	100	2309.05	2309.06	-4.3	9713588	1	23.2054	4.72	88.2	2	R.LLEGEDAHLSSSQFSSGSQSSR.D
*	2016-11-16-hjk-Sharma-Shalini-SL3-wt.14906.14906.3	6.0729	0.7287	100	2309.06	2309.06	-1.2	13343410	1	20.5428	4.72	44.8	11	R.LLEGEDAHLSSSQFSSGSQSSR.D
*	2016-11-16-hjk-Sharma-Shalini-SL3-wt.3777.3777.2	2.0127	0.5469	100	900.424	900.424	-0.7	6.33589e+06	1	12.2792	5.63	76.9	4	K.VMDVHDGK.V
*	2016-11-16-hjk-Sharma-Shalini-SL3-wt.6802.6802.2	2.9069	0.5666	100	1167.65	1167.65	-0.5	10543888	1	12.0557	7.33	82.4	2	K.VVSTHEQVLR.T
P04792	19	29	0.683	205	22783	6.4	U	0.00706946	3.81948	Heat shock protein beta-1 OS=Homo sapiens GN=HSPB1 PE=1 SV=2	0	29	0
*	2016-11-16-hjk-Sharma-Shalini-SL3-wt.19249.19249.2	2.1623	0.1751	99.3	987.609	987.61	-1.2	22030232	1	6.43948	12	64.3	2	R.RVPFSLLR.G
*	2016-11-16-hjk-Sharma-Shalini-SL3-wt.23039.23039.2	2.0843	0.4107	100	961.452	961.453	-0.5	1.37103e+06	1	10.8372	6.56	66.7	2	R.GPSWDPFR.D
*	2016-11-16-hjk-Sharma-Shalini-SL3-wt.25507.25507.3	2.8724	0.6436	100	1902.87	1902.87	0.3	4264149	1	13.6438	7.33	40	2	R.GPSWDPFRDWYPHSR.L
*	2016-11-16-hjk-Sharma-Shalini-SL3-wt.25384.25384.4	2.2513	0.517	100	1902.87	1902.87	0.1	805989	1	7.1544	7.33	19.4	2	R.GPSWDPFRDWYPHSR.L
*	2016-11-16-hjk-Sharma-Shalini-SL3-wt.24859.24859.2	2.9231	0.3999	100	1163.62	1163.62	-0.6	4.76499e+06	1	9.50365	6.56	66.7	2	R.LFDQAFGLPR.L
*	2016-11-16-hjk-Sharma-Shalini-SL3-wt.11410.11410.2	2.58	0.4992	100	1075.57	1075.57	-0.6	99150776	1	9.45627	6.56	66.7	1	R.QLSSGVSEIR.H
*	2016-11-16-hjk-Sharma-Shalini-SL3-wt.22984.22984.2	6.7361	0.6377	100	1783.92	1783.92	-1.4	3.10544e+06	1	11.9228	4.72	82.1	1	R.VSLDVNHFAPDELTVK.T
*	2016-11-16-hjk-Sharma-Shalini-SL3-wt.22969.22969.3	2.7252	0.254	99.7	1783.92	1783.92	-0.3	7.19628e+06	1	6.22806	4.72	34	2	R.VSLDVNHFAPDELTVK.T
*	2016-11-16-hjk-Sharma-Shalini-SL3-wt.8128.8128.2	2.845	0.5199	100	1146.64	1146.64	1.2	1.55858e+06	1	8.84569	6.56	88.9	1	K.TKDGVVEITGK.H
*	2016-11-16-hjk-Sharma-Shalini-SL3-wt.11777.11777.2	1.8609	0.4603	99.9	917.494	917.494	0.2	13811467	1	7.96214	4.46	64.3	1	K.DGVVEITGK.H
*	2016-11-16-hjk-Sharma-Shalini-SL3-wt.7302.7302.2	3.5597	0.4367	100	1468.74	1468.74	-0.7	1.49877e+06	1	11.4434	4.89	81	1	K.DGVVEITGKHEER.Q
*	2016-11-16-hjk-Sharma-Shalini-SL3-wt.7296.7296.3	3.146	0.5363	100	1468.74	1468.74	-1	12700910	1	9.96328	4.89	47.4	1	K.DGVVEITGKHEER.Q
*	2016-11-16-hjk-Sharma-Shalini-SL3-wt.10028.10028.4	2.7424	0.2258	99.6	2554.23	2554.23	0.2	14673916	1	5.99665	5.06	15.3	1	K.DGVVEITGKHEERQDEHGYISR.C
*	2016-11-16-hjk-Sharma-Shalini-SL3-wt.3983.3983.3	4.3066	0.5992	100	1655.75	1655.75	-0.6	2712521	1	14.916	5.63	57.5	1	K.HEERQDEHGYISR.C
*	2016-11-16-hjk-Sharma-Shalini-SL3-wt.3969.3969.4	3.6544	0.6107	100	1655.75	1655.75	-1.6	2.63361e+06	1	11.0777	5.63	32.1	1	K.HEERQDEHGYISR.C
*	2016-11-16-hjk-Sharma-Shalini-SL3-wt.5236.5236.2	2.424	0.448	100	1104.51	1104.51	0.2	6117847	1	9.00269	5.63	68.8	1	R.QDEHGYISR.C
*	2016-11-16-hjk-Sharma-Shalini-SL3-wt.27824.27824.2	2.7863	0.6441	100	3098.56	3098.56	0.8	984048	1	12.7172	4.14	22.7	3	K.YTLPPGVDPTQVSSSLSPEGTLTVEAPMPK.L
*	2016-11-16-hjk-Sharma-Shalini-SL3-wt.24420.24420.2	5.3053	0.6134	100	1905.99	1905.99	-1.2	3497638	1	13.8992	4.46	78.6	2	K.LATQSNEITIPVTFESR.A
*	2016-11-16-hjk-Sharma-Shalini-SL3-wt.5551.5551.2	2.076	0.3854	99.8	941.504	941.505	-1.7	2.78693e+06	1	7.48757	6.56	58.8	2	R.AQLGGPEAAK.S
P60174	15	18	0.671	249	26669	6.9	U	0.00361256	3.68813	Triosephosphate isomerase OS=Homo sapiens GN=TPI1 PE=1 SV=2	0	18	0
*	2016-11-16-hjk-Sharma-Shalini-SL3-wt.20866.20866.2	1.8939	0.4358	99.7	954.481	954.483	-2.6	4.24158e+06	1	7.9384	9.08	57.1	1	K.FFVGGNWK.M
*	2016-11-16-hjk-Sharma-Shalini-SL3-wt.27165.27165.2	4.053	0.2937	100	1414.79	1414.79	-0.3	1.65273e+06	1	11.1074	6.56	76.9	1	K.QSLGELIGTLNAAK.V
*	2016-11-16-hjk-Sharma-Shalini-SL3-wt.26492.26492.2	5.5337	0.6663	100	2192.07	2192.07	-0.8	2.09396e+06	1	15.4588	4.14	73.3	2	K.VPADTEVVCAPPTAYIDFAR.Q
*	2016-11-16-hjk-Sharma-Shalini-SL3-wt.9069.9069.2	3.1903	0.5931	100	1137.57	1137.57	-1.3	2755584	1	13.2777	8.26	72.2	1	K.IAVAAQNCYK.V
*	2016-11-16-hjk-Sharma-Shalini-SL3-wt.21560.21560.2	4.661	0.5724	100	1621.83	1621.83	2.6	2.95208e+06	1	11.4527	6.56	67.9	1	K.VTNGAFTGEISPGMIK.D
*	2016-11-16-hjk-Sharma-Shalini-SL3-wt.19182.19182.2	4.1943	0.6043	100	1586.74	1586.74	1.3	5.51027e+06	1	13.3062	5.63	87.5	1	K.DCGATWVVLGHSER.R
*	2016-11-16-hjk-Sharma-Shalini-SL3-wt.16168.16168.3	2.2692	0.4288	99.9	1742.84	1742.84	-0.6	4235544	1	6.33675	7.11	34.1	1	K.DCGATWVVLGHSERR.H
*	2016-11-16-hjk-Sharma-Shalini-SL3-wt.12448.12448.3	4.8678	0.6437	100	1614.82	1614.82	-1.8	2.60613e+06	1	11.2434	5.8	59.1	1	R.RHVFGESDELIGQK.V
*	2016-11-16-hjk-Sharma-Shalini-SL3-wt.15219.15219.2	4.7485	0.5185	100	1458.72	1458.72	-2.3	4914057	1	18.7832	4.72	83.3	1	R.HVFGESDELIGQK.V
*	2016-11-16-hjk-Sharma-Shalini-SL3-wt.26471.26471.3	3.6932	0.6056	100	1807.97	1807.97	0.8	1.05636e+06	1	11.1419	5.63	44	1	K.VAHALAEGLGVIACIGEK.L
*	2016-11-16-hjk-Sharma-Shalini-SL3-wt.27646.27646.2	4.0903	0.6626	100	1602.89	1602.89	-0.5	2286260	1	13.2065	6.56	80	2	K.VVLAYEPVWAIGTGK.T
*	2016-11-16-hjk-Sharma-Shalini-SL3-wt.4470.4470.2	3.0475	0.5264	100	1466.72	1466.72	-1.1	2174084	1	12.4653	5.63	68.2	1	K.TATPQQAQEVHEK.L
*	2016-11-16-hjk-Sharma-Shalini-SL3-wt.4462.4462.3	2.2156	0.3655	99.8	1466.72	1466.72	-0.2	2.06672e+06	1	5.76224	5.63	34.1	1	K.TATPQQAQEVHEK.L
*	2016-11-16-hjk-Sharma-Shalini-SL3-wt.8987.8987.2	3.4733	0.5966	100	1234.6	1234.6	-2.4	4517356	1	12.4524	6.56	76.2	1	K.SNVSDAVAQSTR.I
*	2016-11-16-hjk-Sharma-Shalini-SL3-wt.12583.12583.2	2.5677	0.2121	99.6	1326.67	1326.67	-1.4	59194840	1	8.26284	8.26	62.5	2	R.IIYGGSVTGATCK.E
Q9NZT1	9	10	0.671	146	15892	4.4	U	0.00342286	3.68813	Calmodulin-like protein 5 OS=Homo sapiens GN=CALML5 PE=1 SV=2	0	10	0
*	2016-11-16-hjk-Sharma-Shalini-SL3-wt.25042.25042.2	7.3465	0.7117	100	2263.12	2263.12	-1.1	3442836	1	16.2893	4.14	78.4	1	K.AFSAVDTDGNGTINAQELGAALK.A
*	2016-11-16-hjk-Sharma-Shalini-SL3-wt.6564.6564.2	2.1532	0.385	99.9	1058.59	1058.6	-1	6.68594e+06	1	7.01075	9.08	68.8	1	K.NLSEAQLRK.L
*	2016-11-16-hjk-Sharma-Shalini-SL3-wt.21294.21294.3	2.9431	0.4593	100	1445.79	1445.79	-0.3	5270356	1	10.0174	6.56	48.6	1	K.ARAGLEDLQVAFR.A
*	2016-11-16-hjk-Sharma-Shalini-SL3-wt.25223.25223.2	3.6458	0.4883	100	1218.65	1218.65	-0.5	6253851	1	10.551	4.46	78.9	1	R.AGLEDLQVAFR.A
*	2016-11-16-hjk-Sharma-Shalini-SL3-wt.17729.17729.3	2.2851	0.3419	99.7	1787.82	1787.82	-0.4	4.49136e+06	1	7.74976	4.25	34.5	1	R.AFDQDGDGHITVDELR.R
*	2016-11-16-hjk-Sharma-Shalini-SL3-wt.15245.15245.3	3.5615	0.5929	100	1943.92	1943.92	-1.3	11543859	1	11.5632	4.58	31.5	1	R.AFDQDGDGHITVDELRR.A
*	2016-11-16-hjk-Sharma-Shalini-SL3-wt.15223.15223.4	2.4035	0.3741	99.7	1943.92	1943.92	-0.8	2.37096e+06	1	6.56775	4.58	14.1	1	R.AFDQDGDGHITVDELRR.A
*	2016-11-16-hjk-Sharma-Shalini-SL3-wt.28486.28486.2	5.2663	0.6911	100	2040.02	2040.03	-0.5	1.93133e+06	1	13.9031	4.14	71.4	2	R.AMAGLGQPLPQEELDAMIR.E
*	2016-11-16-hjk-Sharma-Shalini-SL3-wt.16753.16753.2	2.8871	0.5287	100	2012.89	2012.89	-0.5	5.48828e+06	1	9.27745	4.12	41.9	1	R.EADVDQDGRVNYEEFAR.M
P04264	76	308	0.669	644	66039	8.1	U	0.0239005	3.66659	Keratin, type II cytoskeletal 1 OS=Homo sapiens GN=KRT1 PE=1 SV=6	0	308	0
*	2016-11-16-hjk-Sharma-Shalini-SL3-wt.17750.17750.2	5.0674	0.7013	100	1657.79	1657.79	-0.7	279296736	1	16.511	9.08	71	20	R.SGGGFSSGSAGIINYQR.R
*	2016-11-16-hjk-Sharma-Shalini-SL3-wt.15168.15168.3	3.2964	0.4836	100	1814.89	1813.89	-1.4	3737391	1	8.19157	10.88	25.8	1	R.SGGGFSSGSAGIINYQRR.T
*	2016-11-16-hjk-Sharma-Shalini-SL3-wt.16248.16248.2	6.3086	0.7844	100	1766.73	1765.73	-2.7	9147348	1	19.3127	8.26	58.3	34	R.FSSCGGGGGSFGAGGGFGSR.S
*	2016-11-16-hjk-Sharma-Shalini-SL3-wt.13119.13119.2	1.9158	0.472	99.8	874.497	874.499	-2.2	23435318	1	8.13497	9.08	69.2	2	R.SLVNLGGSK.S
*	2016-11-16-hjk-Sharma-Shalini-SL3-wt.13284.13284.2	1.558	0.3311	99.3	832.489	832.489	-0.1	334472512	1	5.66987	10.06	66.7	1	K.SISISVAR.G
*	2016-11-16-hjk-Sharma-Shalini-SL3-wt.24261.24261.2	3.2785	0.2765	100	1383.69	1383.69	0.4	6237524	1	11.0152	6.56	66.7	3	K.SLNNQFASFIDK.V
	2016-11-16-hjk-Sharma-Shalini-SL3-wt.15751.15751.2	5.9245	0.5376	100	1730.95	1730.95	-2.2	12205573	1	8.09088	9.08	87.5	1	K.VRFLEQQNQVLQTK.W
	2016-11-16-hjk-Sharma-Shalini-SL3-wt.15774.15774.3	4.0762	0.4791	100	1730.95	1730.95	-0.7	81783992	1	8.44667	9.08	44.4	1	K.VRFLEQQNQVLQTK.W
	2016-11-16-hjk-Sharma-Shalini-SL3-wt.14956.14956.2	3.9026	0.4646	100	1475.78	1475.79	-2.2	24285384	1	8.73287	6.56	94.7	4	R.FLEQQNQVLQTK.W
*	2016-11-16-hjk-Sharma-Shalini-SL3-wt.27088.27088.3	5.8712	0.3583	100	2932.51	2932.52	-0.5	1.97386e+06	1	11.7352	4.72	41.2	1	R.FLEQQNQVLQTKWELLQQVDTSTR.T
*	2016-11-16-hjk-Sharma-Shalini-SL3-wt.23034.23034.2	3.88	0.4362	100	1475.75	1475.75	-1.6	5.9524e+06	1	11.7078	4.46	81	12	K.WELLQQVDTSTR.T
*	2016-11-16-hjk-Sharma-Shalini-SL3-wt.29032.29032.3	3.717	0.6818	100	2150.08	2150.08	-0.6	13060790	1	12.3157	7.33	18.3	5	R.THNLEPYFESFINNLRR.R
*	2016-11-16-hjk-Sharma-Shalini-SL3-wt.29266.29266.4	2.6035	0.5164	100	2150.08	2150.08	0	1.35451e+06	1	9.03437	7.33	15.4	3	R.THNLEPYFESFINNLRR.R
*	2016-11-16-hjk-Sharma-Shalini-SL3-wt.3005.3005.3	2.1988	0.2259	99.3	1331.7	1331.7	0.2	419535	1	5.92921	9.08	34.4	1	R.RVDQLKSDQSR.L
*	2016-11-16-hjk-Sharma-Shalini-SL3-wt.9196.9196.2	2.7679	0.2566	99.7	1277.63	1277.63	-2.6	14716741	1	4.91893	4.72	72.2	1	K.SDQSRLDSELK.N
*	2016-11-16-hjk-Sharma-Shalini-SL3-wt.18538.18538.2	2.8667	0.7641	100	1300.53	1300.53	-1.6	6366736	1	10.9251	4.14	72.2	4	K.NMQDMVEDYR.N
*	2016-11-16-hjk-Sharma-Shalini-SL3-wt.15692.15692.2	4.4596	0.6432	100	1542.67	1542.67	-1.5	23594562	1	11.3631	4.72	72.7	1	K.NMQDMVEDYRNK.Y
*	2016-11-16-hjk-Sharma-Shalini-SL3-wt.15699.15699.3	2.7271	0.6048	100	1542.67	1542.67	-1.3	40252344	1	10.0529	4.72	42.1	1	K.NMQDMVEDYRNK.Y
*	2016-11-16-hjk-Sharma-Shalini-SL3-wt.22858.22858.3	5.1977	0.4739	100	2434.06	2434.07	-1.6	4.14508e+06	1	8.8316	4.42	31	1	K.NMQDMVEDYRNKYEDEINK.R
*	2016-11-16-hjk-Sharma-Shalini-SL3-wt.22868.22868.4	3.6256	0.4373	100	2434.07	2434.07	0.2	2.72189e+06	1	7.46505	4.42	18.8	1	K.NMQDMVEDYRNKYEDEINK.R
*	2016-11-16-hjk-Sharma-Shalini-SL3-wt.22126.22126.3	4.9652	0.5616	100	2590.16	2590.17	-1.3	20255176	1	10.5259	4.73	41.7	1	K.NMQDMVEDYRNKYEDEINKR.T
*	2016-11-16-hjk-Sharma-Shalini-SL3-wt.22123.22123.4	4.2134	0.3735	100	2590.16	2590.17	-0.9	93285752	1	7.28377	4.73	16.5	1	K.NMQDMVEDYRNKYEDEINKR.T
*	2016-11-16-hjk-Sharma-Shalini-SL3-wt.22115.22115.5	4.0926	0.3147	99.9	2591.17	2590.17	-1.5	1.90776e+06	1	7.17943	4.73	20.4	1	K.NMQDMVEDYRNKYEDEINKR.T
	2016-11-16-hjk-Sharma-Shalini-SL3-wt.6462.6462.2	2.9911	0.5565	100	1152.55	1152.55	0.1	89265408	1	10.1178	4.72	81.2	1	R.NKYEDEINK.R
	2016-11-16-hjk-Sharma-Shalini-SL3-wt.6406.6406.2	2.7562	0.5278	100	1308.65	1308.65	-2.1	218422688	1	8.88493	6.56	75	1	R.NKYEDEINKR.T
	2016-11-16-hjk-Sharma-Shalini-SL3-wt.6396.6396.3	3.826	0.442	100	1308.65	1308.65	-0.8	684676670	1	8.44799	6.56	65.6	2	R.NKYEDEINKR.T
	2016-11-16-hjk-Sharma-Shalini-SL3-wt.6344.6344.2	1.8136	0.3485	99.8	910.415	910.415	0.3	23378344	1	10.7076	4.14	66.7	1	K.YEDEINK.R
	2016-11-16-hjk-Sharma-Shalini-SL3-wt.4918.4918.2	2.0152	0.7003	100	1066.51	1066.52	-1.6	27652036	1	13.662	4.72	71.4	1	K.YEDEINKR.T
*	2016-11-16-hjk-Sharma-Shalini-SL3-wt.13422.13422.2	3.4112	0.3651	100	1421.74	1421.74	-1.4	154659984	1	6.97727	6.56	59.1	1	K.RTNAENEFVTIK.K
*	2016-11-16-hjk-Sharma-Shalini-SL3-wt.13411.13411.3	3.7198	0.4695	100	1421.74	1421.74	-0.9	8.13869e+06	1	9.77016	6.56	35.7	1	K.RTNAENEFVTIK.K
*	2016-11-16-hjk-Sharma-Shalini-SL3-wt.9782.9782.2	3.9767	0.4428	100	1549.83	1549.83	-1.5	8114446	1	7.74144	8.8	62.5	1	K.RTNAENEFVTIKK.D
*	2016-11-16-hjk-Sharma-Shalini-SL3-wt.9767.9767.3	3.9875	0.4561	100	1549.83	1549.83	-0.9	77241832	1	9.53742	8.8	41.3	2	K.RTNAENEFVTIKK.D
*	2016-11-16-hjk-Sharma-Shalini-SL3-wt.16922.16922.2	3.5105	0.5657	100	1265.64	1265.64	-1	4.05161e+06	1	12.0631	4.46	70	2	R.TNAENEFVTIK.K
*	2016-11-16-hjk-Sharma-Shalini-SL3-wt.12363.12363.2	3.6903	0.6173	100	1393.73	1393.73	-1.5	16299315	1	12.6593	6.56	77.3	3	R.TNAENEFVTIKK.D
*	2016-11-16-hjk-Sharma-Shalini-SL3-wt.12357.12357.3	3.5371	0.4719	100	1393.73	1393.73	-1.1	6441148	1	9.38814	6.56	57.9	1	R.TNAENEFVTIKK.D
*	2016-11-16-hjk-Sharma-Shalini-SL3-wt.6252.6252.2	3.4385	0.3997	100	1127.54	1127.54	-1.3	6.78583e+06	1	12.9854	6.56	83.3	1	K.KDVDGAYMTK.V
*	2016-11-16-hjk-Sharma-Shalini-SL3-wt.9651.9651.2	1.9208	0.4663	99.9	999.444	999.445	-1.2	7597067	1	12.7257	4.46	64.3	3	K.DVDGAYMTK.V
*	2016-11-16-hjk-Sharma-Shalini-SL3-wt.17461.17461.2	4.8141	0.473	100	1653.81	1653.82	-0.8	1.1233e+06	1	13.6992	4.72	84.6	1	K.DVDGAYMTKVDLQAK.L
*	2016-11-16-hjk-Sharma-Shalini-SL3-wt.24793.24793.2	2.9029	0.409	100	1302.71	1302.72	-2.1	7748097	1	9.08652	4.14	73.7	1	R.SLDLDSIIAEVK.A
*	2016-11-16-hjk-Sharma-Shalini-SL3-wt.8409.8409.2	2.2702	0.4338	100	1065.52	1065.52	-0.2	1.01164e+06	1	8.43415	4.46	71.4	3	K.AQYEDIAQK.S
*	2016-11-16-hjk-Sharma-Shalini-SL3-wt.7056.7056.2	4.2203	0.5166	100	1340.67	1340.67	-1.8	6.67586e+06	1	14.4286	6.56	100	3	K.SKAEAESLYQSK.Y
*	2016-11-16-hjk-Sharma-Shalini-SL3-wt.7089.7089.3	2.4507	0.5046	99.9	1340.67	1340.67	-1.4	8.32284e+06	1	9.34203	6.56	43.8	1	K.SKAEAESLYQSK.Y
*	2016-11-16-hjk-Sharma-Shalini-SL3-wt.18799.18799.3	8.0864	0.7145	100	2501.25	2501.25	-2.2	4.13321e+06	1	16.6599	4.89	59.7	1	K.SKAEAESLYQSKYEELQITAGR.H
*	2016-11-16-hjk-Sharma-Shalini-SL3-wt.18784.18784.4	4.1187	0.4047	100	2501.25	2501.25	-0.7	5.11528e+06	1	8.46461	4.89	25.5	1	K.SKAEAESLYQSKYEELQITAGR.H
*	2016-11-16-hjk-Sharma-Shalini-SL3-wt.9007.9007.2	2.5269	0.6568	100	1125.54	1125.54	-1.4	290846880	1	14.4809	4.46	66.7	1	K.AEAESLYQSK.Y
*	2016-11-16-hjk-Sharma-Shalini-SL3-wt.20531.20531.2	5.7025	0.6718	100	2286.12	2286.12	-0.5	1.85092e+06	1	15.9706	4.4	79.3	1	K.AEAESLYQSKYEELQITAGR.H
*	2016-11-16-hjk-Sharma-Shalini-SL3-wt.20487.20487.3	6.3869	0.6935	100	2286.12	2286.12	0.1	5202637	1	14.7403	4.4	44.1	1	K.AEAESLYQSKYEELQITAGR.H
	2016-11-16-hjk-Sharma-Shalini-SL3-wt.15750.15750.2	2.8964	0.4108	100	1179.6	1179.6	-1.3	92117264	1	11.6801	4.46	72.2	43	K.YEELQITAGR.H
*	2016-11-16-hjk-Sharma-Shalini-SL3-wt.12632.12632.2	3.2481	0.5256	100	1302.7	1302.7	-2	52301544	1	9.28793	6.56	83.3	1	R.NSKIEISELNR.V
*	2016-11-16-hjk-Sharma-Shalini-SL3-wt.6623.6623.2	2.7579	0.2877	99.8	1073.59	1073.6	-2.6	5.59426e+06	1	5.22689	6.56	86.7	3	R.LRSEIDNVK.K
*	2016-11-16-hjk-Sharma-Shalini-SL3-wt.4877.4877.2	2.4759	0.2153	99.8	1201.69	1201.69	-0.6	9137100	1	4.58955	8.8	66.7	1	R.LRSEIDNVKK.Q
*	2016-11-16-hjk-Sharma-Shalini-SL3-wt.4410.4410.3	2.6581	0.1588	99.3	1201.69	1201.69	-0.7	2150230	1	5.47451	8.8	55.2	1	R.LRSEIDNVKK.Q
*	2016-11-16-hjk-Sharma-Shalini-SL3-wt.15100.15100.2	6.6885	0.6192	100	1844.94	1844.95	-2.3	7.95742e+06	1	13.7008	6.56	93.3	1	K.KQISNLQQSISDAEQR.G
*	2016-11-16-hjk-Sharma-Shalini-SL3-wt.15060.15060.3	3.6066	0.4574	100	1844.94	1844.95	-1.3	5.50454e+06	1	9.02937	6.56	39.7	2	K.KQISNLQQSISDAEQR.G
*	2016-11-16-hjk-Sharma-Shalini-SL3-wt.22202.22202.3	7.3938	0.6762	100	2457.27	2457.27	-1.7	13920829	1	12.1161	6.56	55.1	1	K.KQISNLQQSISDAEQRGENALK.D
*	2016-11-16-hjk-Sharma-Shalini-SL3-wt.22201.22201.4	4.3027	0.2492	100	2457.27	2457.27	-0.8	11765963	1	7.09443	6.56	26.5	1	K.KQISNLQQSISDAEQRGENALK.D
*	2016-11-16-hjk-Sharma-Shalini-SL3-wt.18666.18666.2	5.0141	0.5822	100	1716.84	1716.85	-4.6	5527683	1	13.47	4.46	71.4	2	K.QISNLQQSISDAEQR.G
*	2016-11-16-hjk-Sharma-Shalini-SL3-wt.24795.24795.2	6.6921	0.5525	100	2329.17	2329.17	-0.7	5.71184e+06	1	16.0729	4.72	68.8	1	K.QISNLQQSISDAEQRGENALK.D
*	2016-11-16-hjk-Sharma-Shalini-SL3-wt.24882.24882.3	5.0341	0.4552	100	2329.17	2329.17	-1	84667912	1	11.3744	4.72	31.4	1	K.QISNLQQSISDAEQRGENALK.D
*	2016-11-16-hjk-Sharma-Shalini-SL3-wt.21955.21955.2	5.4381	0.5775	100	1599.83	1599.83	-3.4	9209470	1	13.446	4.72	88	1	K.NKLNDLEDALQQAK.E
*	2016-11-16-hjk-Sharma-Shalini-SL3-wt.21975.21975.3	3.5473	0.4192	100	1599.83	1599.83	-1.7	8851459	1	9.37203	4.72	40.9	1	K.NKLNDLEDALQQAK.E
*	2016-11-16-hjk-Sharma-Shalini-SL3-wt.28450.28450.3	7.094	0.662	100	2184.13	2184.13	1.3	1.91847e+06	1	12.6944	4.57	55	1	K.NKLNDLEDALQQAKEDLAR.L
*	2016-11-16-hjk-Sharma-Shalini-SL3-wt.20912.20912.2	4.3369	0.5576	100	1357.69	1357.7	-1.1	176247424	1	12.3421	4.14	72.7	5	K.LNDLEDALQQAK.E
*	2016-11-16-hjk-Sharma-Shalini-SL3-wt.28503.28503.3	4.1887	0.5077	100	1941.99	1941.99	-0.3	1.47304e+06	1	9.51102	4.25	42.6	1	K.LNDLEDALQQAKEDLAR.L
*	2016-11-16-hjk-Sharma-Shalini-SL3-wt.18481.18481.3	3.1171	0.4103	100	1523.79	1523.79	-0.6	3432294	1	6.30061	6.56	52.8	2	R.LLRDYQELMNTK.L
*	2016-11-16-hjk-Sharma-Shalini-SL3-wt.15660.15660.2	2.0464	0.5063	100	1141.52	1141.52	-0.5	31557836	1	8.51167	4.46	62.5	1	R.DYQELMNTK.L
*	2016-11-16-hjk-Sharma-Shalini-SL3-wt.10365.10365.2	2.1565	0.4941	100	1033.52	1033.52	-0.2	2.72549e+06	1	10.4926	4.14	68.8	3	R.TLLEGEESR.M
*	2016-11-16-hjk-Sharma-Shalini-SL3-wt.14940.14940.3	6.9587	0.6977	100	2565.16	2565.17	-2	11257710	1	17.3041	7.11	38.3	5	R.MSGECAPNVSVSVSTSHTTISGGGSR.G
*	2016-11-16-hjk-Sharma-Shalini-SL3-wt.8232.8232.2	9.4491	0.5573	100	2383.95	2383.95	-0.8	4358057	1	7.84721	8.64	82.6	20	R.GGGGGGYGSGGSSYGSGGGSYGSGGGGGGGR.G
*	2016-11-16-hjk-Sharma-Shalini-SL3-wt.9825.9825.2	2.0471	0.304	99.2	3312.3	3312.31	-1.9	1.0774e+06	1	3.84749	8.59	18.6	1	R.GSYGSGGSSYGSGGGSYGSGGGGGGHGSYGSGSSSGGYR.G
*	2016-11-16-hjk-Sharma-Shalini-SL3-wt.9796.9796.3	7.515	0.486	100	3312.3	3312.31	-2.5	6299803	1	6.21038	8.59	39.2	58	R.GSYGSGGSSYGSGGGSYGSGGGGGGHGSYGSGSSSGGYR.G
*	2016-11-16-hjk-Sharma-Shalini-SL3-wt.8032.8032.3	3.5466	0.8468	100	4299.72	4299.72	0.1	2.07178e+06	1	11.5074	9.42	5.6	1	R.GSYGSGGSSYGSGGGSYGSGGGGGGHGSYGSGSSSGGYRGGSGGGGGGSSGGR.G
*	2016-11-16-hjk-Sharma-Shalini-SL3-wt.8018.8018.4	6.7653	0.7909	100	4299.72	4299.72	-0.7	11490877	1	13.5567	9.42	9.8	8	R.GSYGSGGSSYGSGGGSYGSGGGGGGHGSYGSGSSSGGYRGGSGGGGGGSSGGR.G
*	2016-11-16-hjk-Sharma-Shalini-SL3-wt.2860.2860.3	3.1232	0.5289	100	2079.91	2079.91	0.1	871536	1	9.48499	12	21.6	1	R.GGSGGGGGGSSGGRGSGGGSSGGSIGGR.G
*	2016-11-16-hjk-Sharma-Shalini-SL3-wt.2957.2957.2	3.8024	0.7655	100	1092.5	1092.5	0.1	2.48293e+06	1	17.5557	10.06	79.2	4	R.GSGGGSSGGSIGGR.G
*	2016-11-16-hjk-Sharma-Shalini-SL3-wt.3721.3721.3	2.9581	0.4684	100	1751.83	1751.83	-0.6	427264	1	8.1745	10.99	19.7	1	R.GSGGGSSGGSIGGRGSSSGGVK.S
P35908	59	94	0.657	639	65433	8	U	0.00735138	3.53942	Keratin, type II cytoskeletal 2 epidermal OS=Homo sapiens GN=KRT2 PE=1 SV=2	0	94	0
*	2016-11-16-hjk-Sharma-Shalini-SL3-wt.12372.12372.3	3.1832	0.3632	100	2056.01	2056.01	-0.1	3.04037e+06	1	6.20913	12.28	27.9	1	R.GGGGGGFRGFSSGSAVVSGGSRR.S
*	2016-11-16-hjk-Sharma-Shalini-SL3-wt.9960.9960.2	3.4128	0.6482	100	1254.6	1254.61	-2.7	9041334	1	14.471	10.06	65.2	2	R.GFSSGSAVVSGGSR.R
*	2016-11-16-hjk-Sharma-Shalini-SL3-wt.12154.12154.2	2.4156	0.6368	100	1131.51	1131.51	-1.2	15464872	1	10.3785	8.26	56.2	1	R.STSSFSCLSR.H
*	2016-11-16-hjk-Sharma-Shalini-SL3-wt.9168.9168.2	4.3926	0.6436	100	1320.58	1320.58	-1.3	41880976	1	24.0559	10.06	70	2	R.HGGGGGGFGGGGFGSR.S
*	2016-11-16-hjk-Sharma-Shalini-SL3-wt.9157.9157.3	2.9817	0.5435	100	1320.58	1320.58	-1	19520108	1	10.6057	10.06	37	2	R.HGGGGGGFGGGGFGSR.S
*	2016-11-16-hjk-Sharma-Shalini-SL3-wt.12866.12866.2	2.0832	0.3722	99.9	831.493	831.493	0.1	23537082	1	8.48216	9.08	73.3	2	R.SLVGLGGTK.S
*	2016-11-16-hjk-Sharma-Shalini-SL3-wt.24238.24238.2	8.1031	0.6899	100	2399.02	2399.02	0.1	4.45855e+06	1	16.8331	10.06	65.2	6	R.GGGFGGGSSFGGGSGFSGGGFGGGGFGGGR.F
*	2016-11-16-hjk-Sharma-Shalini-SL3-wt.9806.9806.2	2.1996	0.4254	99.9	1041.55	1041.56	-2.5	13013976	1	7.72571	4.46	66.7	1	K.VDPEIQNVK.A
	2016-11-16-hjk-Sharma-Shalini-SL3-wt.15751.15751.2	5.9245	0.5376	100	1730.95	1730.95	-2.2	12205573	1	8.09088	9.08	87.5	1	K.VRFLEQQNQVLQTK.W
	2016-11-16-hjk-Sharma-Shalini-SL3-wt.15774.15774.3	4.0762	0.4791	100	1730.95	1730.95	-0.7	81783992	1	8.44667	9.08	44.4	1	K.VRFLEQQNQVLQTK.W
	2016-11-16-hjk-Sharma-Shalini-SL3-wt.14956.14956.2	3.9026	0.4646	100	1475.78	1475.79	-2.2	24285384	1	8.73287	6.56	94.7	4	R.FLEQQNQVLQTK.W
*	2016-11-16-hjk-Sharma-Shalini-SL3-wt.13330.13330.2	2.8766	0.4146	100	1193.63	1193.63	-1.8	16574485	1	8.75178	6.56	55.6	3	K.RYLDGLTAER.T
*	2016-11-16-hjk-Sharma-Shalini-SL3-wt.15686.15686.2	2.2155	0.5862	100	1037.52	1037.53	-1.4	118352200	1	11.7596	4.46	68.8	1	R.YLDGLTAER.T
*	2016-11-16-hjk-Sharma-Shalini-SL3-wt.25430.25430.2	6.4938	0.7187	100	2127.95	2127.95	-0.9	3752400	1	19.426	3.96	80	2	R.TSQNSELNNMQDLVEDYK.K
*	2016-11-16-hjk-Sharma-Shalini-SL3-wt.22663.22663.2	6.4307	0.6706	100	2256.04	2256.05	-0.2	3943055	1	18.2683	4.4	74.2	1	R.TSQNSELNNMQDLVEDYKK.K
*	2016-11-16-hjk-Sharma-Shalini-SL3-wt.20451.20451.3	5.6561	0.6099	99.9	2257.03	2256.05	-6.2	2717162	1	13.1304	4.4	35	3	R.TSQNSELNNMQDLVEDYKK.K
	2016-11-16-hjk-Sharma-Shalini-SL3-wt.3741.3741.3	4.1248	0.49	100	1322.7	1322.71	-1.8	1.59318e+06	1	8.54331	8.7	71.9	2	K.KKYEDEINKR.T
	2016-11-16-hjk-Sharma-Shalini-SL3-wt.5157.5157.2	2.96	0.3896	100	1038.51	1038.51	1.5	5.17686e+06	1	7.81563	4.72	92.9	1	K.KYEDEINK.R
	2016-11-16-hjk-Sharma-Shalini-SL3-wt.4697.4697.2	3.2568	0.4576	100	1194.61	1194.61	-1.1	5.31008e+06	1	9.17479	6.56	93.8	1	K.KYEDEINKR.T
	2016-11-16-hjk-Sharma-Shalini-SL3-wt.6344.6344.2	1.8136	0.3485	99.8	910.415	910.415	0.3	23378344	1	10.7076	4.14	66.7	1	K.YEDEINK.R
	2016-11-16-hjk-Sharma-Shalini-SL3-wt.4918.4918.2	2.0152	0.7003	100	1066.51	1066.52	-1.6	27652036	1	13.662	4.72	71.4	1	K.YEDEINKR.T
*	2016-11-16-hjk-Sharma-Shalini-SL3-wt.14209.14209.2	3.7116	0.4053	100	1364.72	1364.72	-0.4	4522507	1	7.17279	6.56	68.2	2	K.RTAAENDFVTLK.K
*	2016-11-16-hjk-Sharma-Shalini-SL3-wt.14236.14236.3	3.2511	0.5672	100	1364.72	1364.72	0.4	3.34094e+06	1	9.45423	6.56	39.5	1	K.RTAAENDFVTLK.K
*	2016-11-16-hjk-Sharma-Shalini-SL3-wt.10486.10486.2	2.8754	0.1202	99.6	1492.81	1492.81	-0.7	2.68006e+06	1	5.59926	8.8	41.7	1	K.RTAAENDFVTLKK.D
*	2016-11-16-hjk-Sharma-Shalini-SL3-wt.10436.10436.3	3.1478	0.4307	100	1492.81	1492.81	-0.6	5.32237e+06	1	8.65779	8.8	44.7	1	K.RTAAENDFVTLKK.D
*	2016-11-16-hjk-Sharma-Shalini-SL3-wt.17310.17310.2	3.32	0.6023	100	1208.61	1208.62	-0.9	9532415	1	10.9287	4.46	70	2	R.TAAENDFVTLK.K
*	2016-11-16-hjk-Sharma-Shalini-SL3-wt.12572.12572.2	3.6663	0.6128	100	1336.71	1336.71	-1.8	13746171	1	10.7666	6.56	72.7	1	R.TAAENDFVTLKK.D
*	2016-11-16-hjk-Sharma-Shalini-SL3-wt.12593.12593.3	2.3559	0.4954	100	1336.71	1336.71	-0.7	52923964	1	8.71775	6.56	36.1	1	R.TAAENDFVTLKK.D
*	2016-11-16-hjk-Sharma-Shalini-SL3-wt.10550.10550.2	4.0245	0.4706	100	1196.6	1196.6	-1.3	7.40633e+06	1	10.0133	6.56	94.4	1	K.KDVDNAYMIK.V
*	2016-11-16-hjk-Sharma-Shalini-SL3-wt.15491.15491.2	1.8756	0.4619	100	1068.5	1068.5	-0.2	6.96831e+06	1	10.0396	4.46	56.2	2	K.DVDNAYMIK.V
*	2016-11-16-hjk-Sharma-Shalini-SL3-wt.29318.29318.2	4.4321	0.527	100	1460.8	1460.8	-0.3	144229936	1	12.509	4.14	76.2	2	K.VDLLNQEIEFLK.V
*	2016-11-16-hjk-Sharma-Shalini-SL3-wt.28566.28566.3	5.0824	0.5553	100	3048.49	3048.49	-2	805213	1	14.1002	4.4	22.9	5	K.VLYDAEISQIHQSVTDTNVILSMDNSR.N
	2016-11-16-hjk-Sharma-Shalini-SL3-wt.24791.24791.2	3.1022	0.4081	100	1329.72	1329.73	-1.4	3.93014e+06	1	9.92235	4.14	59.1	1	R.NLDLDSIIAEVK.A
	2016-11-16-hjk-Sharma-Shalini-SL3-wt.9450.9450.2	2.3777	0.453	100	1107.54	1107.54	-0.2	5.50364e+06	1	8.62727	4.46	80	2	K.AQYEEIAQR.S
*	2016-11-16-hjk-Sharma-Shalini-SL3-wt.6229.6229.2	4.8341	0.4545	100	1391.68	1391.68	-2	4669517	1	12.6581	5.8	100	1	R.SKEEAEALYHSK.Y
*	2016-11-16-hjk-Sharma-Shalini-SL3-wt.6216.6216.3	3.3336	0.5459	100	1391.68	1391.68	-2.6	5.5494e+06	1	9.76902	5.8	50	1	R.SKEEAEALYHSK.Y
*	2016-11-16-hjk-Sharma-Shalini-SL3-wt.18164.18164.4	4.2827	0.5347	100	2566.28	2566.28	2	1570208	1	9.41622	5	18.6	1	R.SKEEAEALYHSKYEELQVTVGR.H
*	2016-11-16-hjk-Sharma-Shalini-SL3-wt.16336.16336.2	2.8309	0.4555	100	1193.62	1193.62	-0.9	17482306	1	11.4683	4.46	72.2	5	K.YEELQVTVGR.H
*	2016-11-16-hjk-Sharma-Shalini-SL3-wt.19671.19671.2	2.9436	0.3241	100	1343.75	1343.75	-1.2	2248950	1	8.00738	4.72	68.4	1	K.EIKIEISELNR.V
*	2016-11-16-hjk-Sharma-Shalini-SL3-wt.19660.19660.3	2.0119	0.3299	99.5	1343.75	1343.75	-0.4	1.19476e+06	1	6.59174	4.72	40.6	1	K.EIKIEISELNR.V
*	2016-11-16-hjk-Sharma-Shalini-SL3-wt.6461.6461.2	1.841	0.347	99.6	994.567	994.568	-1.4	66485116	1	6.96774	7.33	62.5	1	R.LQGEIAHVK.K
*	2016-11-16-hjk-Sharma-Shalini-SL3-wt.4591.4591.2	2.3769	0.4219	100	1122.66	1122.66	-1.2	8790128	1	7.94625	8.8	83.3	1	R.LQGEIAHVKK.Q
*	2016-11-16-hjk-Sharma-Shalini-SL3-wt.16180.16180.2	3.3034	0.7079	100	1329.64	1329.64	-1.8	3480098	1	15.431	4.14	63.6	1	K.NVQDAIADAEQR.G
*	2016-11-16-hjk-Sharma-Shalini-SL3-wt.21734.21734.2	5.2838	0.6547	100	1964.97	1964.98	-3.2	5.41122e+06	1	14.3102	4.89	73.3	1	K.NVQDAIADAEQRGEHALK.D
*	2016-11-16-hjk-Sharma-Shalini-SL3-wt.21688.21688.3	4.3688	0.6132	100	1964.98	1964.98	0.6	6.13309e+06	1	12.8639	4.89	39.3	2	K.NVQDAIADAEQRGEHALK.D
*	2016-11-16-hjk-Sharma-Shalini-SL3-wt.22972.22972.2	5.5554	0.5736	100	1613.85	1613.85	1.1	1.9068e+06	1	11.2249	4.72	91.7	1	R.NKLNDLEEALQQAK.E
*	2016-11-16-hjk-Sharma-Shalini-SL3-wt.22988.22988.3	3.8951	0.4521	100	1613.85	1613.85	-0.2	1.23511e+06	1	9.14364	4.72	47.5	1	R.NKLNDLEEALQQAK.E
*	2016-11-16-hjk-Sharma-Shalini-SL3-wt.22166.22166.2	4.446	0.5462	100	1371.71	1371.71	-1	10093154	1	10.6144	4.14	81.8	2	K.LNDLEEALQQAK.E
*	2016-11-16-hjk-Sharma-Shalini-SL3-wt.29208.29208.3	4.1121	0.5433	100	1956	1956	-0.2	409949	1	9.66891	4.25	32.3	1	K.LNDLEEALQQAKEDLAR.L
	2016-11-16-hjk-Sharma-Shalini-SL3-wt.20629.20629.2	4.3239	0.4754	100	1521.81	1521.81	-1.6	3.86587e+06	1	8.07892	6.56	81	1	R.LLRDYQELMNVK.L
	2016-11-16-hjk-Sharma-Shalini-SL3-wt.20655.20655.3	3.3343	0.3248	100	1521.81	1521.81	-0.3	48990140	1	6.60329	6.56	44.7	1	R.LLRDYQELMNVK.L
	2016-11-16-hjk-Sharma-Shalini-SL3-wt.18859.18859.2	1.9964	0.4012	99.9	1139.54	1139.54	-0.1	7.98038e+06	1	9.4644	4.46	62.5	2	R.DYQELMNVK.L
	2016-11-16-hjk-Sharma-Shalini-SL3-wt.24334.24334.2	3.1073	0.5248	100	1263.69	1263.69	-1.2	974869	1	11.7616	4.46	65	1	K.LALDVEIATYR.K
	2016-11-16-hjk-Sharma-Shalini-SL3-wt.6363.6363.2	3.0832	0.5511	100	1133.56	1133.56	-0.4	3.05256e+06	1	9.82855	4.72	81.2	1	R.KLLEGEECR.M
	2016-11-16-hjk-Sharma-Shalini-SL3-wt.7496.7496.2	2.0621	0.3026	99.7	1005.47	1005.47	-1	23355362	1	13.9021	4.14	57.1	1	K.LLEGEECR.M
*	2016-11-16-hjk-Sharma-Shalini-SL3-wt.5873.5873.2	4.5577	0.6598	100	1740.71	1740.71	-0.3	5957519	1	10.3247	8.8	51.6	2	R.GSSSGGGYSSGSSSYGSGGR.Q
*	2016-11-16-hjk-Sharma-Shalini-SL3-wt.6333.6333.2	5.9928	0.405	100	1741.75	1741.75	-0.1	9323248	1	16.1967	9.08	76.3	1	R.GGSGGGGSISGGGYGSGGGSGGR.Y
*	2016-11-16-hjk-Sharma-Shalini-SL3-wt.5481.5481.2	2.6547	0.7572	100	1197.55	1197.55	-0.6	7767682	1	18.7433	8.8	60.9	1	K.GGSISGGGYGSGGGK.H
*	2016-11-16-hjk-Sharma-Shalini-SL3-wt.4291.4291.2	5.9125	0.8109	100	1588.68	1588.68	-0.2	4282493	1	18.939	8.8	73.5	1	R.GGSSSGGGYGSGGGGSSSVK.G
P63244	17	17	0.653	317	35077	7.7	U	0.00267998	3.4978	Guanine nucleotide-binding protein subunit beta-2-like 1 OS=Homo sapiens GN=GNB2L1 PE=1 SV=3	0	17	0
*	2016-11-16-hjk-Sharma-Shalini-SL3-wt.28804.28804.3	5.2841	0.5773	100	2627.3	2627.3	0.3	992346	1	13.0657	7.33	45.7	1	K.GHNGWVTQIATTPQFPDMILSASR.D
*	2016-11-16-hjk-Sharma-Shalini-SL3-wt.10913.10913.2	3.8625	0.5212	100	1562.79	1562.79	0.9	3.01899e+06	1	9.40587	6.56	73.9	1	K.LTRDETNYGIPQR.A
*	2016-11-16-hjk-Sharma-Shalini-SL3-wt.12312.12312.2	2.2783	0.5352	100	1192.56	1192.56	-1	7569012	1	9.92556	4.46	70.6	1	R.DETNYGIPQR.A
*	2016-11-16-hjk-Sharma-Shalini-SL3-wt.20756.20756.2	2.6683	0.5282	100	1264.65	1264.65	-0.7	6448423	1	9.96657	6.56	50	1	R.LWDLTTGTTTR.R
*	2016-11-16-hjk-Sharma-Shalini-SL3-wt.22930.22930.2	2.9858	0.6413	100	1309.64	1309.64	0.3	5778200	1	15.1923	4.46	59.1	1	K.DVLSVAFSSDNR.Q
*	2016-11-16-hjk-Sharma-Shalini-SL3-wt.19207.19207.2	1.8649	0.4567	99.9	1090.57	1090.57	0.4	1.55213e+06	1	8.42023	8.26	56.2	1	K.LWNTLGVCK.Y
*	2016-11-16-hjk-Sharma-Shalini-SL3-wt.16445.16445.3	3.7744	0.6951	100	1981.87	1981.87	-1	3.85316e+06	1	12.1777	4.72	33.3	1	K.YTVQDESHSEWVSCVR.F
*	2016-11-16-hjk-Sharma-Shalini-SL3-wt.22833.22833.2	4.2273	0.5598	100	1907.89	1907.9	-1	1.50064e+06	1	16.0047	6.56	70	1	R.FSPNSSNPIIVSCGWDK.L
*	2016-11-16-hjk-Sharma-Shalini-SL3-wt.15269.15269.2	1.9964	0.451	99.9	1004.5	1004.5	-1.4	5331607	1	8.74038	8.26	69.2	1	K.VWNLANCK.L
*	2016-11-16-hjk-Sharma-Shalini-SL3-wt.16875.16875.3	5.5462	0.5494	100	2743.31	2743.31	-0.1	4.27128e+06	1	11.0973	7.38	36.4	1	K.TNHIGHTGYLNTVTVSPDGSLCASGGK.D
*	2016-11-16-hjk-Sharma-Shalini-SL3-wt.16913.16913.4	4.0635	0.5404	100	2743.31	2743.31	-0.3	3.01419e+06	1	8.9952	7.38	26.1	1	K.TNHIGHTGYLNTVTVSPDGSLCASGGK.D
*	2016-11-16-hjk-Sharma-Shalini-SL3-wt.24429.24429.2	3.8498	0.5427	100	1476.68	1476.68	1.2	13801801	1	15.3461	4.14	71.4	1	K.DGQAMLWDLNEGK.H
*	2016-11-16-hjk-Sharma-Shalini-SL3-wt.28894.28894.3	5.1468	0.6036	100	2276.11	2276.11	0.9	1047434	1	12.9067	5.63	36.5	1	K.HLYTLDGGDIINALCFSPNR.Y
*	2016-11-16-hjk-Sharma-Shalini-SL3-wt.21683.21683.2	2.8528	0.5556	100	1366.68	1366.68	-0.6	4391335	1	12.5412	8.26	50	1	R.YWLCAATGPSIK.I
*	2016-11-16-hjk-Sharma-Shalini-SL3-wt.22021.22021.2	5.1408	0.7039	100	1789	1789	0.1	2.66476e+06	1	16.2287	4.72	85.7	1	K.IIVDELKQEVISTSSK.A
*	2016-11-16-hjk-Sharma-Shalini-SL3-wt.5593.5593.2	2.8242	0.4153	100	978.509	978.51	-1.1	1.90697e+06	1	8.30302	6.56	75	1	K.QEVISTSSK.A
*	2016-11-16-hjk-Sharma-Shalini-SL3-wt.19165.19165.2	2.5823	0.4161	100	1060.6	1059.59	-2	6.60906e+06	1	8.54965	10.06	73.3	1	R.VWQVTIGTR.-
P01834	5	22	0.651	106	11609	5.9	U	0.0103719	3.47713	Ig kappa chain C region OS=Homo sapiens GN=IGKC PE=1 SV=1	0	22	0
*	2016-11-16-hjk-Sharma-Shalini-SL3-wt.28122.28122.2	4.9828	0.6839	100	1946.02	1946.03	-1.1	5506429	1	15.4471	4.46	56.2	12	-.TVAAPSVFIFPPSDEQLK.S
*	2016-11-16-hjk-Sharma-Shalini-SL3-wt.9546.9546.2	6.8855	0.738	100	2135.97	2135.97	-0.1	5.62426e+06	1	21.4674	3.96	80.6	4	K.VDNALQSGNSQESVTEQDSK.D
*	2016-11-16-hjk-Sharma-Shalini-SL3-wt.22543.22543.2	3.3983	0.4808	100	1502.76	1502.76	-0.6	2.15772e+06	1	11.5383	6.56	69.6	3	K.DSTYSLSSTLTLSK.A
*	2016-11-16-hjk-Sharma-Shalini-SL3-wt.13201.13201.2	6.1419	0.6952	100	1875.92	1875.93	-5.5	4352501	1	16.5334	7.11	82.8	2	K.VYACEVTHQGLSSPVTK.S
*	2016-11-16-hjk-Sharma-Shalini-SL3-wt.13178.13178.3	3.6271	0.5836	100	1875.92	1875.93	-1.5	3407162	1	12.9699	7.11	39.6	1	K.VYACEVTHQGLSSPVTK.S
P30086	9	10	0.626	187	21057	7.5	U	0.00267239	3.22669	Phosphatidylethanolamine-binding protein 1 OS=Homo sapiens GN=PEBP1 PE=1 SV=3	0	10	0
*	2016-11-16-hjk-Sharma-Shalini-SL3-wt.25385.25385.4	5.9146	0.5823	100	3471.71	3471.72	-3.3	1.13164e+06	1	12.2781	4.58	14	1	K.WSGPLSLQEVDEQPQHPLHVTYAGAAVDELGK.V
*	2016-11-16-hjk-Sharma-Shalini-SL3-wt.17536.17536.2	6.1611	0.6931	100	1632.8	1632.8	-0.7	5.03125e+06	1	14.1812	6.56	88.9	1	K.NRPTSISWDGLDSGK.L
*	2016-11-16-hjk-Sharma-Shalini-SL3-wt.17548.17548.3	3.3772	0.5459	100	1632.8	1632.8	1.2	1969615	1	10.4157	6.56	44.2	1	K.NRPTSISWDGLDSGK.L
*	2016-11-16-hjk-Sharma-Shalini-SL3-wt.23771.23771.2	3.4237	0.5712	100	1560.83	1560.83	-1	1981621	1	11.4956	4.46	65.2	1	K.LYTLVLTDPDAPSR.K
*	2016-11-16-hjk-Sharma-Shalini-SL3-wt.20330.20330.3	3.3414	0.4852	100	1688.92	1688.92	-0.2	2.80515e+06	1	8.45186	6.56	44.7	1	K.LYTLVLTDPDAPSRK.D
*	2016-11-16-hjk-Sharma-Shalini-SL3-wt.22436.22436.2	5.7826	0.6834	100	1949.94	1949.95	-2.9	1.56776e+06	1	17.2213	4.46	71	1	K.GNDISSGTVLSDYVGSGPPK.G
*	2016-11-16-hjk-Sharma-Shalini-SL3-wt.11041.11041.2	2.5282	0.4626	100	1103.51	1103.52	-0.7	2.08645e+06	1	8.26582	4.46	68.8	1	K.CDEPILSNR.S
*	2016-11-16-hjk-Sharma-Shalini-SL3-wt.24177.24177.2	5.1983	0.7794	100	2069.93	2069.93	-0.4	915447	1	20.7722	4.14	58.1	2	R.APVAGTCYQAEWDDYVPK.L
*	2016-11-16-hjk-Sharma-Shalini-SL3-wt.10123.10123.2	1.7412	0.3488	99.7	937.499	937.499	0.2	1.81225e+06	1	6.21345	6.56	64.3	1	K.LYEQLSGK.-
Q01469	9	13	0.607	135	15164	7	U	0.00481229	3.04576	Fatty acid-binding protein, epidermal OS=Homo sapiens GN=FABP5 PE=1 SV=3	0	13	0
*	2016-11-16-hjk-Sharma-Shalini-SL3-wt.20266.20266.2	2.2152	0.5121	100	927.562	927.562	0.2	2.62215e+06	1	8.12045	6.56	62.5	2	K.ELGVGIALR.K
*	2016-11-16-hjk-Sharma-Shalini-SL3-wt.15433.15433.2	2.0168	0.4283	99.9	1055.66	1055.66	-0.8	12165893	1	7.20831	9.08	70.6	1	K.ELGVGIALRK.M
*	2016-11-16-hjk-Sharma-Shalini-SL3-wt.14590.14590.2	5.3582	0.7383	100	1767.79	1767.79	-1.7	3.99805e+06	1	16.7853	6.56	90	1	K.MGAMAKPDCIITCDGK.N
*	2016-11-16-hjk-Sharma-Shalini-SL3-wt.14573.14573.3	4.2517	0.6952	100	1767.79	1767.79	-1.3	10331079	1	12.859	6.56	48	1	K.MGAMAKPDCIITCDGK.N
*	2016-11-16-hjk-Sharma-Shalini-SL3-wt.12622.12622.2	3.002	0.4837	100	1271.59	1271.59	-2.4	5975444	1	10.3715	6.56	65	1	K.TTQFSCTLGEK.F
*	2016-11-16-hjk-Sharma-Shalini-SL3-wt.4108.4108.2	2.0499	0.2707	99.6	1153.55	1153.55	-0.8	577464	1	6.52869	4.72	58.8	1	K.FEETTADGRK.T
	2016-11-16-hjk-Sharma-Shalini-SL3-wt.20709.20709.2	6.9897	0.8084	100	2434.11	2434.11	0.7	1.54261e+06	1	23.3846	4.72	63.6	1	K.TQTVCNFTDGALVQHQEWDGK.E
	2016-11-16-hjk-Sharma-Shalini-SL3-wt.19483.19483.3	6.6249	0.6921	100	2434.11	2434.11	-1.2	2759909	1	15.5598	4.72	39.4	4	K.TQTVCNFTDGALVQHQEWDGK.E
*	2016-11-16-hjk-Sharma-Shalini-SL3-wt.22058.22058.2	4.2573	0.6971	100	1694.8	1694.8	-1.9	12532598	1	18.4601	5.69	70.8	1	K.LVVECVMNNVTCTR.I
P08779	39	59	0.598	473	51268	5	U	0.00623352	2.96278	Keratin, type I cytoskeletal 16 OS=Homo sapiens GN=KRT16 PE=1 SV=4	0	59	0
	2016-11-16-hjk-Sharma-Shalini-SL3-wt.6371.6371.2	2.3495	0.4775	100	1002.46	1002.46	-0.4	12448614	1	8.65429	9.08	68.8	1	R.QFTSSSSMK.G
	2016-11-16-hjk-Sharma-Shalini-SL3-wt.8681.8681.2	2.7961	0.6183	100	1279.58	1278.59	-4	1.4557e+06	1	9.92601	8.26	55.6	2	K.GSCGIGGGIGGGSSR.I
	2016-11-16-hjk-Sharma-Shalini-SL3-wt.10472.10472.2	2.8757	0.3642	100	1106.56	1106.56	-1.8	3.67049e+06	1	10.4344	8.26	70	1	R.ISSVLAGGSCR.A
*	2016-11-16-hjk-Sharma-Shalini-SL3-wt.12304.12304.2	4.0712	0.6138	100	1338.66	1338.66	-1.1	6.89645e+06	1	15.6871	9.08	70.8	1	R.APSTYGGGLSVSSR.F
	2016-11-16-hjk-Sharma-Shalini-SL3-wt.10093.10093.2	2.5183	0.4443	100	1090.53	1090.53	-0.4	28081492	1	8.28659	6.56	60	2	K.VTMQNLNDR.L
	2016-11-16-hjk-Sharma-Shalini-SL3-wt.24561.24561.3	3.7045	0.4332	100	1880.95	1880.95	-0.3	2.7686e+06	1	7.08718	6.56	34.6	1	K.VTMQNLNDRLASYLDK.V
	2016-11-16-hjk-Sharma-Shalini-SL3-wt.10609.10609.2	2.1096	0.4285	100	809.44	809.44	-0.2	24963616	1	8.72025	6.56	75	2	R.LASYLDK.V
	2016-11-16-hjk-Sharma-Shalini-SL3-wt.14825.14825.2	4.6787	0.4935	100	1556.83	1556.83	-1.6	4342990	1	8.22765	4.4	92	1	K.VRALEEANADLEVK.I
	2016-11-16-hjk-Sharma-Shalini-SL3-wt.14819.14819.3	3.1517	0.4209	100	1556.83	1556.83	-0.6	5726289	1	9.01408	4.4	45	1	K.VRALEEANADLEVK.I
	2016-11-16-hjk-Sharma-Shalini-SL3-wt.14497.14497.2	3.4878	0.5206	100	1301.66	1301.66	-1	15943072	1	11.876	3.96	84.2	11	R.ALEEANADLEVK.I
	2016-11-16-hjk-Sharma-Shalini-SL3-wt.10511.10511.2	2.6962	0.4477	100	1036.53	1036.53	-0.7	34279848	1	8.05426	9.08	90.9	2	K.IRDWYQR.Q
*	2016-11-16-hjk-Sharma-Shalini-SL3-wt.25639.25639.2	6.6677	0.6179	100	2064.14	2064.14	-0.4	5352747	1	15.2724	4.46	70.6	1	K.IIAATIENAQPILQIDNAR.L
	2016-11-16-hjk-Sharma-Shalini-SL3-wt.11725.11725.2	2.0668	0.4286	100	807.399	807.4	-0.3	32583916	1	11.6816	4.46	66.7	4	R.LAADDFR.T
*	2016-11-16-hjk-Sharma-Shalini-SL3-wt.9145.9145.2	3.233	0.5136	100	1259.67	1259.67	-1.2	2.19514e+06	1	8.76633	7.33	82.4	1	R.TKYEHELALR.Q
*	2016-11-16-hjk-Sharma-Shalini-SL3-wt.9131.9131.3	2.8766	0.4108	100	1259.67	1259.67	-1.2	4.15789e+06	1	8.74345	7.33	46.9	1	R.TKYEHELALR.Q
	2016-11-16-hjk-Sharma-Shalini-SL3-wt.17883.17883.2	2.279	0.3388	99.9	1185.69	1185.69	-0.8	15343759	1	5.64737	6.56	72.2	1	R.RVLDELTLAR.T
	2016-11-16-hjk-Sharma-Shalini-SL3-wt.19833.19833.2	2.4618	0.5432	100	1029.59	1029.59	-0.2	77253976	1	9.38874	4.46	66.7	2	R.VLDELTLAR.T
	2016-11-16-hjk-Sharma-Shalini-SL3-wt.23022.23022.2	3.7977	0.5867	100	1276.65	1276.65	0	2.52718e+06	1	10.2602	4.14	70	1	R.TDLEMQIEGLK.E
*	2016-11-16-hjk-Sharma-Shalini-SL3-wt.15918.15918.2	1.6592	0.4749	99.9	893.473	893.473	-0.1	3.10208e+06	1	7.25936	4.46	58.3	1	K.EELAYLR.K
*	2016-11-16-hjk-Sharma-Shalini-SL3-wt.10935.10935.2	2.0669	0.3164	99.7	1021.57	1021.57	1.5	4.78949e+06	1	5.43354	6.56	57.1	1	K.EELAYLRK.N
*	2016-11-16-hjk-Sharma-Shalini-SL3-wt.14468.14468.2	2.1581	0.3931	99.9	1241.59	1241.59	-0.7	19577734	1	12.074	4.72	87.5	1	K.NHEEEMLALR.G
*	2016-11-16-hjk-Sharma-Shalini-SL3-wt.20176.20176.2	6.2214	0.5514	100	2087.96	2087.97	-0.9	3.33976e+06	1	16.0299	3.96	71.4	2	R.GQTGGDVNVEMDAAPGVDLSR.I
*	2016-11-16-hjk-Sharma-Shalini-SL3-wt.18085.18085.2	5.044	0.511	100	1897.88	1897.88	3.2	2.8822e+06	1	9.2988	4.4	74.1	1	R.ILNEMRDQYEQMAEK.N
*	2016-11-16-hjk-Sharma-Shalini-SL3-wt.8749.8749.2	2.0134	0.3006	99.7	1141.48	1141.48	-0.5	2548016	1	5.47216	4.14	73.3	1	R.DQYEQMAEK.N
*	2016-11-16-hjk-Sharma-Shalini-SL3-wt.24548.24548.2	2.2838	0.4476	100	1096.53	1096.53	-0.8	4.06645e+06	1	9.28696	4.46	71.4	1	R.DAETWFLSK.T
*	2016-11-16-hjk-Sharma-Shalini-SL3-wt.8955.8955.2	3.2199	0.4839	100	1405.69	1405.69	-2	12940782	1	11.0366	4.46	58.3	1	K.EVASNSELVQSSR.S
	2016-11-16-hjk-Sharma-Shalini-SL3-wt.13951.13951.2	3.345	0.583	100	1220.6	1220.6	-0.1	4619422	1	10.5168	4.14	73.7	2	K.ASLENSLEETK.G
	2016-11-16-hjk-Sharma-Shalini-SL3-wt.15673.15673.2	4.6035	0.6534	100	1379.73	1379.73	-1.2	446497376	1	12.9516	6.56	89.5	1	K.TRLEQEIATYR.R
	2016-11-16-hjk-Sharma-Shalini-SL3-wt.15676.15676.3	3.429	0.4994	100	1379.73	1379.73	-0.8	93191712	1	9.6946	6.56	44.4	1	K.TRLEQEIATYR.R
	2016-11-16-hjk-Sharma-Shalini-SL3-wt.13242.13242.3	2.7961	0.4028	99.9	1535.83	1535.83	-1.1	74798880	1	8.46969	9.08	46.3	1	K.TRLEQEIATYRR.L
	2016-11-16-hjk-Sharma-Shalini-SL3-wt.12311.12311.2	2.1794	0.3689	99.9	1122.58	1122.58	-0.4	24402740	1	6.40228	4.46	68.8	1	R.LEQEIATYR.R
	2016-11-16-hjk-Sharma-Shalini-SL3-wt.9416.9416.2	2.2624	0.09	99.1	1278.68	1278.68	-0.1	4222383	1	4.37281	6.56	55.6	1	R.LEQEIATYRR.L
	2016-11-16-hjk-Sharma-Shalini-SL3-wt.9403.9403.3	2.2154	0.345	99.9	1278.68	1278.68	-0.2	2.23659e+06	1	5.5097	6.56	38.7	1	R.LEQEIATYRR.L
*	2016-11-16-hjk-Sharma-Shalini-SL3-wt.11135.11135.3	5.5417	0.6734	100	2506.19	2506.19	-2.1	1.54178e+06	1	16.3193	5.8	37.7	1	R.RLLEGEDAHLSSQQASGQSYSSR.E
*	2016-11-16-hjk-Sharma-Shalini-SL3-wt.11166.11166.4	4.6978	0.526	100	2506.19	2506.19	0	2.60103e+06	1	10.0978	5.8	22.2	1	R.RLLEGEDAHLSSQQASGQSYSSR.E
*	2016-11-16-hjk-Sharma-Shalini-SL3-wt.12316.12316.2	6.9755	0.821	100	2350.09	2350.09	-0.7	4340372	1	25.2516	4.72	90.9	1	R.LLEGEDAHLSSQQASGQSYSSR.E
*	2016-11-16-hjk-Sharma-Shalini-SL3-wt.12292.12292.3	6.4597	0.6176	100	2350.09	2350.09	-0.6	5.99516e+06	1	17.355	4.72	51.5	1	R.LLEGEDAHLSSQQASGQSYSSR.E
*	2016-11-16-hjk-Sharma-Shalini-SL3-wt.6481.6481.2	3.1665	0.5944	100	1260.57	1260.57	-3.1	7383568	1	13.0887	6.56	65	1	R.EVFTSSSSSSSR.Q
*	2016-11-16-hjk-Sharma-Shalini-SL3-wt.4751.4751.2	2.3007	0.1174	99.5	855.54	855.541	-0.7	3.88117e+06	1	4.92958	10.99	75	1	R.QTRPILK.E
Q04695	38	51	0.593	432	48106	5	U	0.00589968	2.91742	Keratin, type I cytoskeletal 17 OS=Homo sapiens GN=KRT17 PE=1 SV=2	0	51	0
*	2016-11-16-hjk-Sharma-Shalini-SL3-wt.7363.7363.2	2.3381	0.253	99.8	984.499	984.5	-0.9	5252144	1	7.12657	9.08	62.5	1	R.QFTSSSSIK.G
*	2016-11-16-hjk-Sharma-Shalini-SL3-wt.7159.7159.2	2.9217	0.4016	100	1034.5	1034.5	-0.6	8683307	1	12.1479	8.26	55	1	R.LSGGLGAGSCR.L
	2016-11-16-hjk-Sharma-Shalini-SL3-wt.10609.10609.2	2.1096	0.4285	100	809.44	809.44	-0.2	24963616	1	8.72025	6.56	75	2	R.LASYLDK.V
*	2016-11-16-hjk-Sharma-Shalini-SL3-wt.14820.14820.3	2.2932	0.375	99.5	1600.85	1600.85	-1.3	5249424	1	6.4162	4.4	34	1	K.VRALEEANTELEVK.I
*	2016-11-16-hjk-Sharma-Shalini-SL3-wt.14728.14728.2	3.1918	0.5087	100	1345.68	1345.68	-1.6	8966999	1	11.4363	3.96	68.4	1	R.ALEEANTELEVK.I
	2016-11-16-hjk-Sharma-Shalini-SL3-wt.10511.10511.2	2.6962	0.4477	100	1036.53	1036.53	-0.7	34279848	1	8.05426	9.08	90.9	2	K.IRDWYQR.Q
*	2016-11-16-hjk-Sharma-Shalini-SL3-wt.13118.13118.2	1.4491	0.4327	99.3	994.425	994.426	-1.3	4.65614e+06	1	6.81817	6.56	58.3	1	R.DYSQYYR.T
*	2016-11-16-hjk-Sharma-Shalini-SL3-wt.8228.8228.2	1.8118	0.3419	99.7	974.515	974.515	-0.1	3.3001e+06	1	7.55246	4.46	64.3	1	R.TIEELQNK.I
*	2016-11-16-hjk-Sharma-Shalini-SL3-wt.28332.28332.2	6.1013	0.7366	100	2068.14	2068.14	0	886758	1	16.2122	4.46	66.7	1	K.ILTATVDNANILLQIDNAR.L
	2016-11-16-hjk-Sharma-Shalini-SL3-wt.11725.11725.2	2.0668	0.4286	100	807.399	807.4	-0.3	32583916	1	11.6816	4.46	66.7	4	R.LAADDFR.T
	2016-11-16-hjk-Sharma-Shalini-SL3-wt.9199.9199.2	2.4607	0.4661	100	1222.64	1222.64	-1.2	6.1038e+06	1	8.90531	6.56	75	1	R.TKFETEQALR.L
*	2016-11-16-hjk-Sharma-Shalini-SL3-wt.17897.17897.2	2.0788	0.252	99.3	1342.75	1342.74	1.2	5427270	1	4.95441	6.56	42.9	1	R.LSVEADINGLRR.V
	2016-11-16-hjk-Sharma-Shalini-SL3-wt.17883.17883.2	2.279	0.3388	99.9	1185.69	1185.69	-0.8	15343759	1	5.64737	6.56	72.2	1	R.RVLDELTLAR.A
	2016-11-16-hjk-Sharma-Shalini-SL3-wt.19833.19833.2	2.4618	0.5432	100	1029.59	1029.59	-0.2	77253976	1	9.38874	4.46	66.7	2	R.VLDELTLAR.A
*	2016-11-16-hjk-Sharma-Shalini-SL3-wt.22904.22904.2	3.3225	0.3686	100	1303.66	1303.66	0.2	16504940	1	9.16981	4.14	82.4	1	R.ADLEMQIENLK.E
	2016-11-16-hjk-Sharma-Shalini-SL3-wt.10268.10268.2	2.8633	0.4618	100	993.561	993.561	-0.7	4.95664e+06	1	7.09129	6.56	85.7	2	K.EELAYLKK.N
	2016-11-16-hjk-Sharma-Shalini-SL3-wt.6149.6149.3	2.8759	0.4866	100	1370.65	1370.65	0.4	9927124	1	8.79846	5.8	44.7	1	K.KNHEEEMNALR.G
	2016-11-16-hjk-Sharma-Shalini-SL3-wt.7708.7708.2	2.3213	0.6378	100	1242.55	1242.55	-0.8	3.75086e+06	1	12.4716	4.72	87.5	2	K.NHEEEMNALR.G
	2016-11-16-hjk-Sharma-Shalini-SL3-wt.7761.7761.3	2.0607	0.5308	100	1242.55	1242.55	-0.1	4.31786e+06	1	9.47601	4.72	35.7	1	K.NHEEEMNALR.G
	2016-11-16-hjk-Sharma-Shalini-SL3-wt.11206.11206.2	4.6285	0.4318	100	1438.7	1438.7	-0.7	4.31253e+06	1	8.9756	4.72	85	2	R.ILNEMRDQYEK.M
*	2016-11-16-hjk-Sharma-Shalini-SL3-wt.26462.26462.2	2.4803	0.6737	100	1144.5	1144.49	1.1	2125341	1	12.5554	4.14	68.8	3	K.DAEDWFFSK.T
	2016-11-16-hjk-Sharma-Shalini-SL3-wt.14364.14364.2	6.6239	0.6892	100	2104.05	2104.05	-0.6	63752668	1	14.8483	4.4	80.6	1	K.TEELNREVATNSELVQSGK.S
	2016-11-16-hjk-Sharma-Shalini-SL3-wt.14374.14374.3	5.804	0.7021	100	2104.05	2104.05	0.3	212384384	1	15.1939	4.4	47.4	1	K.TEELNREVATNSELVQSGK.S
	2016-11-16-hjk-Sharma-Shalini-SL3-wt.9539.9539.2	3.7788	0.5947	100	1361.69	1361.69	-1.1	972136	1	13.8567	4.46	65.2	3	R.EVATNSELVQSGK.S
	2016-11-16-hjk-Sharma-Shalini-SL3-wt.18446.18446.4	3.3187	0.3457	99.8	2332.21	2332.21	-1.7	1.6457e+06	1	6.10301	4.89	15.7	1	R.EVATNSELVQSGKSEISELRR.T
*	2016-11-16-hjk-Sharma-Shalini-SL3-wt.13525.13525.2	3.4224	0.5793	100	1403.67	1403.68	-2.4	10548648	1	12.7632	4.14	70	1	K.ASLEGNLAETENR.Y
	2016-11-16-hjk-Sharma-Shalini-SL3-wt.6432.6432.2	4.1481	0.5768	100	1486.59	1486.59	-3.4	6.66164e+06	1	8.70761	4.14	77.8	1	R.CEMEQQNQEYK.I
	2016-11-16-hjk-Sharma-Shalini-SL3-wt.15673.15673.2	4.6035	0.6534	100	1379.73	1379.73	-1.2	446497376	1	12.9516	6.56	89.5	1	K.TRLEQEIATYR.R
	2016-11-16-hjk-Sharma-Shalini-SL3-wt.15676.15676.3	3.429	0.4994	100	1379.73	1379.73	-0.8	93191712	1	9.6946	6.56	44.4	1	K.TRLEQEIATYR.R
	2016-11-16-hjk-Sharma-Shalini-SL3-wt.13242.13242.3	2.7961	0.4028	99.9	1535.83	1535.83	-1.1	74798880	1	8.46969	9.08	46.3	1	K.TRLEQEIATYRR.L
	2016-11-16-hjk-Sharma-Shalini-SL3-wt.12311.12311.2	2.1794	0.3689	99.9	1122.58	1122.58	-0.4	24402740	1	6.40228	4.46	68.8	1	R.LEQEIATYR.R
	2016-11-16-hjk-Sharma-Shalini-SL3-wt.9416.9416.2	2.2624	0.09	99.1	1278.68	1278.68	-0.1	4222383	1	4.37281	6.56	55.6	1	R.LEQEIATYRR.L
	2016-11-16-hjk-Sharma-Shalini-SL3-wt.9403.9403.3	2.2154	0.345	99.9	1278.68	1278.68	-0.2	2.23659e+06	1	5.5097	6.56	38.7	1	R.LEQEIATYRR.L
*	2016-11-16-hjk-Sharma-Shalini-SL3-wt.12619.12619.3	3.4973	0.5633	100	1672.87	1672.87	0	4.43874e+06	1	10.0554	5.8	39.6	1	R.RLLEGEDAHLTQYK.K
*	2016-11-16-hjk-Sharma-Shalini-SL3-wt.14325.14325.2	4.0816	0.5786	100	1516.76	1516.76	-0.2	17490288	1	12.5673	4.72	77.3	1	R.LLEGEDAHLTQYK.K
*	2016-11-16-hjk-Sharma-Shalini-SL3-wt.11237.11237.2	3.9928	0.6118	100	1644.86	1644.86	-2.4	1.27158e+06	1	12.3316	5.8	75	1	R.LLEGEDAHLTQYKK.E
*	2016-11-16-hjk-Sharma-Shalini-SL3-wt.11195.11195.3	2.8117	0.4228	100	1644.86	1644.86	0.2	5571271	1	7.75098	5.8	32.6	1	R.LLEGEDAHLTQYKK.E
*	2016-11-16-hjk-Sharma-Shalini-SL3-wt.12102.12102.2	1.7114	0.4961	99.9	1117.57	1117.57	0.1	28893654	1	8.63352	4.14	66.7	1	R.TIVEEVQDGK.V
P62805	13	17	0.583	103	11367	11.4	U	0.0082481	2.82825	Histone H4 OS=Homo sapiens GN=HIST1H4A PE=1 SV=2	0	17	0
*	2016-11-16-hjk-Sharma-Shalini-SL3-wt.8211.8211.2	1.8379	0.4703	99.9	888.478	888.479	-0.8	6013577	1	6.73833	6.56	53.8	1	R.DNIQGITK.P
*	2016-11-16-hjk-Sharma-Shalini-SL3-wt.12506.12506.2	2.9275	0.4605	100	1325.75	1325.75	-1.2	5.77339e+06	1	9.48179	9.08	61.9	1	R.DNIQGITKPAIR.R
*	2016-11-16-hjk-Sharma-Shalini-SL3-wt.12518.12518.3	2.5232	0.4124	99.9	1325.75	1325.75	-1	3.88435e+06	1	7.64947	9.08	39.5	1	R.DNIQGITKPAIR.R
*	2016-11-16-hjk-Sharma-Shalini-SL3-wt.10082.10082.3	2.7452	0.442	100	1481.85	1481.85	-0.4	10743495	1	8.87105	10.88	35.1	2	R.DNIQGITKPAIRR.L
*	2016-11-16-hjk-Sharma-Shalini-SL3-wt.14930.14930.2	3.8647	0.482	100	1336.72	1336.72	-0.9	21906186	1	9.63626	6.56	75	1	K.RISGLIYEETR.G
*	2016-11-16-hjk-Sharma-Shalini-SL3-wt.17477.17477.2	3.2573	0.471	100	1180.62	1180.62	-0.8	79556648	1	12.7041	4.46	66.7	2	R.ISGLIYEETR.G
*	2016-11-16-hjk-Sharma-Shalini-SL3-wt.21766.21766.3	2.54	0.2525	99.7	1577.89	1577.89	-0.4	766818	1	6.31482	6.56	26.2	1	R.ISGLIYEETRGVLK.V
*	2016-11-16-hjk-Sharma-Shalini-SL3-wt.22346.22346.2	1.9166	0.5407	100	989.577	989.578	-0.4	3866966	1	8.90931	6.56	69.2	2	K.VFLENVIR.D
*	2016-11-16-hjk-Sharma-Shalini-SL3-wt.5915.5915.2	2.5853	0.5895	100	1134.54	1134.54	1.2	5320061	1	11.2886	5.63	68.8	2	R.DAVTYTEHAK.R
*	2016-11-16-hjk-Sharma-Shalini-SL3-wt.4969.4969.2	2.7668	0.5644	100	1290.65	1290.64	1.5	1.12619e+06	1	9.42086	7.33	60	1	R.DAVTYTEHAKR.K
*	2016-11-16-hjk-Sharma-Shalini-SL3-wt.4962.4962.3	2.5814	0.5577	100	1290.64	1290.64	-1.1	6341041	1	9.53022	7.33	45.2	1	R.DAVTYTEHAKR.K
*	2016-11-16-hjk-Sharma-Shalini-SL3-wt.24710.24710.2	3.7155	0.5967	100	1466.8	1466.8	0.1	1.48863e+06	1	12.1757	8.8	72.7	1	K.TVTAMDVVYALKR.Q
*	2016-11-16-hjk-Sharma-Shalini-SL3-wt.24698.24698.3	2.5446	0.3982	99.9	1466.8	1466.8	-1	1.34001e+06	1	7.36245	8.8	34.1	1	K.TVTAMDVVYALKR.Q
P07737	7	8	0.579	140	15054	8.3	U	0.00285564	2.79315	Profilin-1 OS=Homo sapiens GN=PFN1 PE=1 SV=2	0	8	0
*	2016-11-16-hjk-Sharma-Shalini-SL3-wt.19564.19564.2	3.0018	0.5632	100	1213.62	1213.62	0.1	3.39231e+06	1	11.691	6.56	68.2	1	K.DSPSVWAAVPGK.T
*	2016-11-16-hjk-Sharma-Shalini-SL3-wt.28889.28889.2	4.4873	0.5275	100	1643.94	1643.94	0.4	4.34565e+06	1	13.4841	6.56	70.4	2	K.TFVNITPAEVGVLVGK.D
*	2016-11-16-hjk-Sharma-Shalini-SL3-wt.22644.22644.2	3.7302	0.584	100	1470.76	1470.76	2.2	2734754	1	12.7752	8.8	60	1	R.SSFYVNGLTLGGQK.C
*	2016-11-16-hjk-Sharma-Shalini-SL3-wt.27606.27606.2	3.8174	0.6347	100	1625.75	1625.75	0.5	1.2661e+06	1	14.021	3.96	72.7	1	R.DSLLQDGEFSMDLR.T
*	2016-11-16-hjk-Sharma-Shalini-SL3-wt.16505.16505.2	3.148	0.6595	100	1379.71	1379.72	-1.7	7857911	1	11.3058	9.08	65.2	1	K.STGGAPTFNVTVTK.T
*	2016-11-16-hjk-Sharma-Shalini-SL3-wt.6527.6527.2	3.0671	0.4353	100	1023.56	1023.56	-1	3.96465e+06	1	7.6193	7.33	82.4	1	K.EGVHGGLINK.K
*	2016-11-16-hjk-Sharma-Shalini-SL3-wt.4409.4409.2	2.9097	0.4337	99.9	1151.65	1151.65	-3.9	5.84226e+06	1	7.17992	8.8	73.7	1	K.EGVHGGLINKK.C
P02538	44	58	0.574	564	60045	8	U	0.00513915	2.74973	Keratin, type II cytoskeletal 6A OS=Homo sapiens GN=KRT6A PE=1 SV=3	0	58	0
	2016-11-16-hjk-Sharma-Shalini-SL3-wt.4048.4048.2	2.3164	0.3639	100	965.491	965.491	-0.2	2.30025e+06	1	7.46512	12	68.8	1	R.RGFSANSAR.L
*	2016-11-16-hjk-Sharma-Shalini-SL3-wt.11651.11651.2	2.257	0.4177	100	1012.51	1012.51	-0.4	4.66599e+06	1	11.356	10.06	68.8	2	R.SGFSSVSVSR.S
	2016-11-16-hjk-Sharma-Shalini-SL3-wt.9428.9428.3	3.3746	0.6213	100	1667.77	1667.77	-0.4	4837368	1	13.1879	10.28	33.8	1	R.SRGSGGLGGACGGAGFGSR.S
	2016-11-16-hjk-Sharma-Shalini-SL3-wt.11922.11922.2	3.9191	0.7165	100	1424.63	1424.63	-1.7	3.23496e+06	1	14.6685	8.26	72.4	2	R.GSGGLGGACGGAGFGSR.S
	2016-11-16-hjk-Sharma-Shalini-SL3-wt.13780.13780.2	1.7903	0.3897	99.8	881.473	881.473	-0.1	8947005	1	10.23	8.8	60	1	R.SLYGLGGSK.R
	2016-11-16-hjk-Sharma-Shalini-SL3-wt.16623.16623.2	4.1647	0.7234	100	1598.76	1598.76	-1.3	7.85624e+06	1	19.6784	8.26	50	1	R.ISIGGGSCAISGGYGSR.A
	2016-11-16-hjk-Sharma-Shalini-SL3-wt.8757.8757.2	2.9393	0.2732	100	1161.64	1161.64	-0.1	6074891	1	6.4117	9.08	78.6	2	K.VRFLEQQNK.V
	2016-11-16-hjk-Sharma-Shalini-SL3-wt.19209.19209.2	2.9622	0.5909	100	1203.63	1203.64	-1.6	80308432	1	10.0863	6.56	70.6	3	K.WTLLQEQGTK.T
	2016-11-16-hjk-Sharma-Shalini-SL3-wt.10908.10908.2	3.4941	0.4023	100	1172.64	1172.64	-0.4	7522104	1	7.3779	6.56	77.8	1	R.RQLDSIVGER.G
	2016-11-16-hjk-Sharma-Shalini-SL3-wt.13789.13789.2	1.9276	0.388	99.9	1016.54	1016.54	0	79314400	1	7.7923	4.46	50	2	R.QLDSIVGER.G
	2016-11-16-hjk-Sharma-Shalini-SL3-wt.7472.7472.2	2.5302	0.2655	99.9	945.51	945.511	-1	15984057	1	6.04861	6.56	84.6	1	R.GRLDSELR.G
*	2016-11-16-hjk-Sharma-Shalini-SL3-wt.24496.24496.2	2.9408	0.6067	100	1181.55	1181.55	-0.7	2693897	1	12.176	4.14	80	2	R.GMQDLVEDFK.N
	2016-11-16-hjk-Sharma-Shalini-SL3-wt.6462.6462.2	2.9911	0.5565	100	1152.55	1152.55	0.1	89265408	1	10.1178	4.72	81.2	1	K.NKYEDEINK.R
	2016-11-16-hjk-Sharma-Shalini-SL3-wt.6406.6406.2	2.7562	0.5278	100	1308.65	1308.65	-2.1	218422688	1	8.88493	6.56	75	1	K.NKYEDEINKR.T
	2016-11-16-hjk-Sharma-Shalini-SL3-wt.6396.6396.3	3.826	0.442	100	1308.65	1308.65	-0.8	684676670	1	8.44799	6.56	65.6	2	K.NKYEDEINKR.T
	2016-11-16-hjk-Sharma-Shalini-SL3-wt.6344.6344.2	1.8136	0.3485	99.8	910.415	910.415	0.3	23378344	1	10.7076	4.14	66.7	1	K.YEDEINK.R
	2016-11-16-hjk-Sharma-Shalini-SL3-wt.4918.4918.2	2.0152	0.7003	100	1066.51	1066.52	-1.6	27652036	1	13.662	4.72	71.4	1	K.YEDEINKR.T
	2016-11-16-hjk-Sharma-Shalini-SL3-wt.14533.14533.3	3.052	0.4635	100	1378.73	1378.73	-2	2.75268e+06	1	7.94562	6.56	33.3	1	K.RTAAENEFVTLK.K
	2016-11-16-hjk-Sharma-Shalini-SL3-wt.10776.10776.3	3.5582	0.504	100	1506.82	1506.83	-2.8	14152602	1	8.82306	8.8	57.9	1	K.RTAAENEFVTLKK.D
	2016-11-16-hjk-Sharma-Shalini-SL3-wt.17677.17677.2	2.6549	0.2809	99.9	1222.63	1222.63	0.3	3.19592e+06	1	9.48217	4.46	63.2	2	R.TAAENEFVTLK.K
	2016-11-16-hjk-Sharma-Shalini-SL3-wt.13223.13223.2	3.1001	0.5287	100	1350.72	1350.73	-2.3	6551722	1	10.8852	6.56	70	1	R.TAAENEFVTLKK.D
	2016-11-16-hjk-Sharma-Shalini-SL3-wt.10031.10031.2	2.2999	0.6169	100	1026.46	1026.46	2	4157698	1	12.53	4.46	68.8	2	K.DVDAAYMNK.V
	2016-11-16-hjk-Sharma-Shalini-SL3-wt.27243.27243.2	3.3175	0.4067	100	1407.71	1407.71	-1	7.80913e+06	1	7.7707	4.14	75	1	K.ADTLTDEINFLR.A
	2016-11-16-hjk-Sharma-Shalini-SL3-wt.28081.28081.3	3.7901	0.5819	100	3038.43	3038.42	2.2	208134	1	12.4441	4.4	17.2	1	R.ALYDAELSQMQTHISDTSVVLSMDNNR.N
	2016-11-16-hjk-Sharma-Shalini-SL3-wt.24791.24791.2	3.1022	0.4081	100	1329.72	1329.73	-1.4	3.93014e+06	1	9.92235	4.14	59.1	1	R.NLDLDSIIAEVK.A
	2016-11-16-hjk-Sharma-Shalini-SL3-wt.9450.9450.2	2.3777	0.453	100	1107.54	1107.54	-0.2	5.50364e+06	1	8.62727	4.46	80	2	K.AQYEEIAQR.S
	2016-11-16-hjk-Sharma-Shalini-SL3-wt.10615.10615.2	3.9886	0.5015	100	1455.69	1455.69	0.3	36121908	1	9.71627	6.56	80	1	R.SRAEAESWYQTK.Y
	2016-11-16-hjk-Sharma-Shalini-SL3-wt.10606.10606.3	2.7459	0.6155	100	1455.69	1455.69	0.2	5359364	1	12.7882	6.56	38.9	1	R.SRAEAESWYQTK.Y
	2016-11-16-hjk-Sharma-Shalini-SL3-wt.12771.12771.2	3.114	0.6128	100	1212.55	1212.55	-2.1	2.46733e+06	1	13.4384	4.46	76.5	1	R.AEAESWYQTK.Y
	2016-11-16-hjk-Sharma-Shalini-SL3-wt.13050.13050.2	2.8496	0.4837	100	1165.58	1165.58	-1.6	6.94802e+06	1	12.2043	4.46	72.2	2	K.YEELQVTAGR.H
	2016-11-16-hjk-Sharma-Shalini-SL3-wt.8125.8125.2	3.0863	0.475	100	1315.69	1315.7	-2.1	1.47857e+06	1	9.56296	6.56	68.4	1	R.NTKQEIAEINR.M
	2016-11-16-hjk-Sharma-Shalini-SL3-wt.9156.9156.2	2.1109	0.4592	99.8	972.508	972.511	-3.1	10093918	1	7.28288	4.46	71.4	1	K.QEIAEINR.M
	2016-11-16-hjk-Sharma-Shalini-SL3-wt.4825.4825.2	2.1886	0.3025	99.9	1096.61	1096.61	-0.1	4.26624e+06	1	7.26267	7.33	73.3	1	R.LRSEIDHVK.K
	2016-11-16-hjk-Sharma-Shalini-SL3-wt.3673.3673.3	3.2967	0.2525	99.9	1224.7	1224.71	-1	5772001	1	7.36063	8.8	59.4	1	R.LRSEIDHVKK.Q
	2016-11-16-hjk-Sharma-Shalini-SL3-wt.25579.25579.3	5.724	0.5675	100	2416.21	2416.21	0.9	1.10308e+06	1	10.1475	6.56	38.8	1	K.KQCANLQAAIADAEQRGEMALK.D
	2016-11-16-hjk-Sharma-Shalini-SL3-wt.21141.21141.2	4.6967	0.3449	100	1658.79	1658.79	1	3857343	1	12.3574	4.46	71.4	1	K.QCANLQAAIADAEQR.G
	2016-11-16-hjk-Sharma-Shalini-SL3-wt.27537.27537.3	6.3813	0.6678	100	2288.11	2288.11	1.1	3.63346e+06	1	13.1831	4.72	44.8	2	K.QCANLQAAIADAEQRGEMALK.D
	2016-11-16-hjk-Sharma-Shalini-SL3-wt.18076.18076.2	3.0335	0.4471	100	1357.73	1357.73	-0.4	4.14721e+06	1	7.56721	4.72	71.4	1	K.NKLEGLEDALQK.A
	2016-11-16-hjk-Sharma-Shalini-SL3-wt.18602.18602.2	2.7962	0.4917	100	1115.59	1115.59	-1.3	4827160	1	9.04637	4.14	72.2	1	K.LEGLEDALQK.A
	2016-11-16-hjk-Sharma-Shalini-SL3-wt.16151.16151.2	2.2049	0.3243	99.8	1153.55	1153.56	-0.7	43937104	1	8.74787	4.46	56.2	1	K.EYQELMNVK.L
	2016-11-16-hjk-Sharma-Shalini-SL3-wt.24334.24334.2	3.1073	0.5248	100	1263.69	1263.69	-1.2	974869	1	11.7616	4.46	65	1	K.LALDVEIATYR.K
	2016-11-16-hjk-Sharma-Shalini-SL3-wt.6363.6363.2	3.0832	0.5511	100	1133.56	1133.56	-0.4	3.05256e+06	1	9.82855	4.72	81.2	1	R.KLLEGEECR.L
	2016-11-16-hjk-Sharma-Shalini-SL3-wt.7496.7496.2	2.0621	0.3026	99.7	1005.47	1005.47	-1	23355362	1	13.9021	4.14	57.1	1	K.LLEGEECR.L
	2016-11-16-hjk-Sharma-Shalini-SL3-wt.15121.15121.2	3.9806	0.6013	100	1447.77	1447.78	-4	2.04363e+06	1	14.4238	9.08	72.4	2	R.AIGGGLSSVGGGSSTIK.Y
P13647	56	95	0.569	590	62378	7.8	U	0.00804662	2.70681	Keratin, type II cytoskeletal 5 OS=Homo sapiens GN=KRT5 PE=1 SV=3	0	95	0
*	2016-11-16-hjk-Sharma-Shalini-SL3-wt.7777.7777.2	1.9988	0.1621	99.3	810.41	810.41	-0.4	7818190	1	6.66428	10.06	66.7	1	R.QSSVSFR.S
*	2016-11-16-hjk-Sharma-Shalini-SL3-wt.16433.16433.2	3.2633	0.6538	100	1410.72	1410.72	-1.2	3169835	1	11.4174	10.06	62.5	4	R.SFSTASAITPSVSR.T
*	2016-11-16-hjk-Sharma-Shalini-SL3-wt.8692.8692.2	2.0967	0.4991	100	884.447	884.447	0.2	28916040	1	12.747	10.06	69.2	2	R.TSFTSVSR.S
*	2016-11-16-hjk-Sharma-Shalini-SL3-wt.4098.4098.2	3.2663	0.7375	100	865.389	865.391	-2.7	978549	1	16.0508	10.06	68.4	4	R.SGGGGGGGFGR.V
*	2016-11-16-hjk-Sharma-Shalini-SL3-wt.15153.15153.2	3.847	0.7129	100	1410.68	1410.68	0	14549712	1	16.3699	8.26	66.7	1	R.VSLAGACGVGGYGSR.S
*	2016-11-16-hjk-Sharma-Shalini-SL3-wt.10211.10211.2	2.0319	0.4836	100	1094.59	1094.6	-0.7	8586907	1	8.49117	9.98	66.7	2	R.SLYNLGGSKR.I
*	2016-11-16-hjk-Sharma-Shalini-SL3-wt.12687.12687.2	2.6819	0.4302	100	1267.67	1267.68	-0.8	219163776	1	8.78007	12	45.5	1	K.RISISTSGGSFR.N
*	2016-11-16-hjk-Sharma-Shalini-SL3-wt.12650.12650.3	2.6936	0.5168	100	1267.67	1267.68	-0.5	13299153	1	9.85267	12	48.6	2	K.RISISTSGGSFR.N
*	2016-11-16-hjk-Sharma-Shalini-SL3-wt.14999.14999.2	2.9552	0.5485	100	1111.57	1111.57	-1.3	2.52016e+06	1	9.68756	10.06	65	3	R.ISISTSGGSFR.N
	2016-11-16-hjk-Sharma-Shalini-SL3-wt.2771.2771.2	2.3993	0.2103	99.8	1032.53	1032.53	-0.7	787002	1	5.23746	4.72	71.4	2	R.TEEREQIK.T
	2016-11-16-hjk-Sharma-Shalini-SL3-wt.8757.8757.2	2.9393	0.2732	100	1161.64	1161.64	-0.1	6074891	1	6.4117	9.08	78.6	2	K.VRFLEQQNK.V
	2016-11-16-hjk-Sharma-Shalini-SL3-wt.19209.19209.2	2.9622	0.5909	100	1203.63	1203.64	-1.6	80308432	1	10.0863	6.56	70.6	3	K.WTLLQEQGTK.T
	2016-11-16-hjk-Sharma-Shalini-SL3-wt.10908.10908.2	3.4941	0.4023	100	1172.64	1172.64	-0.4	7522104	1	7.3779	6.56	77.8	1	R.RQLDSIVGER.G
	2016-11-16-hjk-Sharma-Shalini-SL3-wt.13789.13789.2	1.9276	0.388	99.9	1016.54	1016.54	0	79314400	1	7.7923	4.46	50	2	R.QLDSIVGER.G
	2016-11-16-hjk-Sharma-Shalini-SL3-wt.7472.7472.2	2.5302	0.2655	99.9	945.51	945.511	-1	15984057	1	6.04861	6.56	84.6	1	R.GRLDSELR.N
*	2016-11-16-hjk-Sharma-Shalini-SL3-wt.24730.24730.2	2.7972	0.4472	100	1238.57	1238.57	-1.9	2.10093e+06	1	9.43468	4.14	72.2	4	R.NMQDLVEDFK.N
	2016-11-16-hjk-Sharma-Shalini-SL3-wt.6462.6462.2	2.9911	0.5565	100	1152.55	1152.55	0.1	89265408	1	10.1178	4.72	81.2	1	K.NKYEDEINK.R
	2016-11-16-hjk-Sharma-Shalini-SL3-wt.6406.6406.2	2.7562	0.5278	100	1308.65	1308.65	-2.1	218422688	1	8.88493	6.56	75	1	K.NKYEDEINKR.T
	2016-11-16-hjk-Sharma-Shalini-SL3-wt.6396.6396.3	3.826	0.442	100	1308.65	1308.65	-0.8	684676670	1	8.44799	6.56	65.6	2	K.NKYEDEINKR.T
	2016-11-16-hjk-Sharma-Shalini-SL3-wt.6344.6344.2	1.8136	0.3485	99.8	910.415	910.415	0.3	23378344	1	10.7076	4.14	66.7	1	K.YEDEINK.R
	2016-11-16-hjk-Sharma-Shalini-SL3-wt.4918.4918.2	2.0152	0.7003	100	1066.51	1066.52	-1.6	27652036	1	13.662	4.72	71.4	1	K.YEDEINKR.T
*	2016-11-16-hjk-Sharma-Shalini-SL3-wt.17360.17360.2	3.8045	0.446	100	1438.73	1438.74	-1.4	82320624	1	7.17133	6.56	63.6	2	K.RTTAENEFVMLK.K
*	2016-11-16-hjk-Sharma-Shalini-SL3-wt.13286.13286.2	2.2885	0.2426	99.3	1568.83	1566.83	-1.8	726678	1	5.71003	8.8	42.9	1	K.RTTAENEFVMLKK.D
*	2016-11-16-hjk-Sharma-Shalini-SL3-wt.13237.13237.3	3.3851	0.4201	99.9	1567.84	1566.83	2.3	6.42176e+06	1	8.68283	8.8	51.3	1	K.RTTAENEFVMLKK.D
*	2016-11-16-hjk-Sharma-Shalini-SL3-wt.20899.20899.2	3.2745	0.3627	100	1282.63	1282.63	-1	50485092	1	9.63532	4.46	65	1	R.TTAENEFVMLK.K
*	2016-11-16-hjk-Sharma-Shalini-SL3-wt.16219.16219.2	3.2165	0.2391	99.9	1410.73	1410.73	-1.9	6097070	1	8.96084	6.56	70	1	R.TTAENEFVMLKK.D
	2016-11-16-hjk-Sharma-Shalini-SL3-wt.10031.10031.2	2.2999	0.6169	100	1026.46	1026.46	2	4157698	1	12.53	4.46	68.8	2	K.DVDAAYMNK.V
	2016-11-16-hjk-Sharma-Shalini-SL3-wt.18622.18622.2	4.7723	0.5582	100	1696.83	1695.83	-1.5	1.78721e+06	1	14.0637	4.4	73.1	1	K.DVDAAYMNKVELEAK.V
*	2016-11-16-hjk-Sharma-Shalini-SL3-wt.28049.28049.2	3.8605	0.6343	100	1425.67	1425.68	-3.3	1355705	1	13.1181	4.14	66.7	2	K.VDALMDEINFMK.M
	2016-11-16-hjk-Sharma-Shalini-SL3-wt.24791.24791.2	3.1022	0.4081	100	1329.72	1329.73	-1.4	3.93014e+06	1	9.92235	4.14	59.1	1	R.NLDLDSIIAEVK.A
*	2016-11-16-hjk-Sharma-Shalini-SL3-wt.9309.9309.2	2.192	0.3157	99.8	1093.53	1093.53	0.7	420932032	1	7.78732	4.46	64.3	1	K.AQYEEIANR.S
*	2016-11-16-hjk-Sharma-Shalini-SL3-wt.10800.10800.2	4.2141	0.5635	100	1485.69	1485.7	-1.3	32183972	1	9.96639	6.56	80	2	R.SRTEAESWYQTK.Y
*	2016-11-16-hjk-Sharma-Shalini-SL3-wt.13211.13211.2	3.3231	0.6329	100	1242.56	1242.56	-1.5	100041464	1	13.0356	4.46	64.7	3	R.TEAESWYQTK.Y
*	2016-11-16-hjk-Sharma-Shalini-SL3-wt.8227.8227.2	2.8754	0.5169	100	1194.57	1194.58	-0.8	43988848	1	11.4405	4.46	66.7	3	K.YEELQQTAGR.H
*	2016-11-16-hjk-Sharma-Shalini-SL3-wt.4387.4387.2	3.0549	0.529	100	1358.65	1358.65	-0.7	1.82293e+06	1	13.5315	7.33	83.3	1	R.NTKHEISEMNR.M
*	2016-11-16-hjk-Sharma-Shalini-SL3-wt.4370.4370.3	3.4339	0.4242	100	1358.65	1358.65	0.2	1.53273e+06	1	10.4502	7.33	52.9	1	R.NTKHEISEMNR.M
*	2016-11-16-hjk-Sharma-Shalini-SL3-wt.4734.4734.2	2.413	0.707	100	1015.46	1015.46	-0.9	20438166	1	14.6929	5.63	78.6	1	K.HEISEMNR.M
*	2016-11-16-hjk-Sharma-Shalini-SL3-wt.7923.7923.2	2.9835	0.3247	100	1057.6	1057.6	-1.5	7.30388e+06	1	6.341	6.56	87.5	1	R.LRAEIDNVK.K
*	2016-11-16-hjk-Sharma-Shalini-SL3-wt.5656.5656.2	2.3295	0.3024	99.9	1185.69	1185.69	-0.1	2786431	1	5.11331	8.8	58.8	1	R.LRAEIDNVKK.Q
*	2016-11-16-hjk-Sharma-Shalini-SL3-wt.16882.16882.3	4.0114	0.5655	100	1829.89	1829.89	0.5	3.82446e+06	1	10.457	6.56	50	1	K.KQCANLQNAIADAEQR.G
*	2016-11-16-hjk-Sharma-Shalini-SL3-wt.24450.24450.3	5.7197	0.5502	100	2441.26	2441.26	2	2.4378e+06	1	9.12428	6.56	41.6	2	K.KQCANLQNAIADAEQRGELALK.D
*	2016-11-16-hjk-Sharma-Shalini-SL3-wt.24448.24448.4	4.9245	0.4295	100	2441.26	2441.26	2.8	1.67001e+06	1	8.28359	6.56	29.8	2	K.KQCANLQNAIADAEQRGELALK.D
*	2016-11-16-hjk-Sharma-Shalini-SL3-wt.20062.20062.2	4.858	0.4781	100	1701.8	1701.8	-0.1	6462260	1	11.6033	4.46	67.9	1	K.QCANLQNAIADAEQR.G
*	2016-11-16-hjk-Sharma-Shalini-SL3-wt.26748.26748.2	3.7969	0.606	100	2314.17	2313.16	0.9	957944	1	11.3517	4.72	41.9	1	K.QCANLQNAIADAEQRGELALK.D
*	2016-11-16-hjk-Sharma-Shalini-SL3-wt.26703.26703.3	6.0075	0.5857	100	2313.16	2313.16	-0.9	3.02903e+06	1	11.1221	4.72	38.8	2	K.QCANLQNAIADAEQRGELALK.D
*	2016-11-16-hjk-Sharma-Shalini-SL3-wt.21945.21945.2	4.2573	0.3608	100	1385.76	1385.76	-1.5	7890658	1	8.38658	4.72	90	1	R.NKLAELEEALQK.A
*	2016-11-16-hjk-Sharma-Shalini-SL3-wt.18624.18624.2	3.2174	0.3767	100	1143.62	1143.63	-1.1	26929260	1	9.11865	4.14	83.3	2	K.LAELEEALQK.A
*	2016-11-16-hjk-Sharma-Shalini-SL3-wt.19157.19157.2	4.3277	0.4571	100	1537.8	1537.8	-1	5764032	1	7.95284	6.56	81	1	R.LLREYQELMNTK.L
*	2016-11-16-hjk-Sharma-Shalini-SL3-wt.19135.19135.3	3.1844	0.3475	99.8	1537.8	1537.8	-2.5	5.46355e+06	1	7.83924	6.56	52.6	1	R.LLREYQELMNTK.L
*	2016-11-16-hjk-Sharma-Shalini-SL3-wt.12490.12490.2	1.8554	0.5477	100	1155.53	1155.54	-0.6	203112640	1	9.89897	4.46	69.2	1	R.EYQELMNTK.L
	2016-11-16-hjk-Sharma-Shalini-SL3-wt.24334.24334.2	3.1073	0.5248	100	1263.69	1263.69	-1.2	974869	1	11.7616	4.46	65	1	K.LALDVEIATYR.K
	2016-11-16-hjk-Sharma-Shalini-SL3-wt.6363.6363.2	3.0832	0.5511	100	1133.56	1133.56	-0.4	3.05256e+06	1	9.82855	4.72	81.2	1	R.KLLEGEECR.L
	2016-11-16-hjk-Sharma-Shalini-SL3-wt.7496.7496.2	2.0621	0.3026	99.7	1005.47	1005.47	-1	23355362	1	13.9021	4.14	57.1	1	K.LLEGEECR.L
*	2016-11-16-hjk-Sharma-Shalini-SL3-wt.15225.15225.2	3.6945	0.6745	100	1439.71	1439.71	0.4	6324737	1	14.4934	9.08	69	5	R.GLGVGFGSGGGSSSSVK.F
*	2016-11-16-hjk-Sharma-Shalini-SL3-wt.4631.4631.2	2.0333	0.5537	100	971.479	971.479	-0.6	8587886	1	10.3952	10.06	62.5	2	K.FVSTTSSSR.K
*	2016-11-16-hjk-Sharma-Shalini-SL3-wt.3078.3078.2	1.9083	0.5843	100	1099.58	1099.57	1.4	1369002	1	10.4194	10.99	38.9	3	K.FVSTTSSSRK.S
P47929	8	20	0.566	136	15075	7.6	U	0.00734908	2.68129	Galectin-7 OS=Homo sapiens GN=LGALS7 PE=1 SV=2	0	20	0
*	2016-11-16-hjk-Sharma-Shalini-SL3-wt.22800.22800.4	6.6681	0.6467	100	2511.18	2511.18	0.7	4.4577e+06	1	13.9566	5.52	32.3	6	R.FHVNLLCGEEQGSDAALHFNPR.L
*	2016-11-16-hjk-Sharma-Shalini-SL3-wt.16895.16895.2	3.7133	0.6386	100	1238.63	1238.63	0.1	10194073	1	12.2172	4.46	70	2	R.LDTSEVVFNSK.E
*	2016-11-16-hjk-Sharma-Shalini-SL3-wt.10753.10753.2	2.9539	0.4547	100	1271.65	1271.65	-2.1	9869295	1	7.80245	6.56	73.7	1	R.EERGPGVPFQR.G
*	2016-11-16-hjk-Sharma-Shalini-SL3-wt.12047.12047.2	1.8495	0.5293	100	857.463	857.463	-0.3	109527240	1	10.3215	10.06	75	2	R.GPGVPFQR.G
*	2016-11-16-hjk-Sharma-Shalini-SL3-wt.8290.8290.2	3.8924	0.7441	100	1399.68	1399.69	-1.6	7017130	1	19.9396	7.41	90	2	K.AVVGDAQYHHFR.H
*	2016-11-16-hjk-Sharma-Shalini-SL3-wt.8270.8270.3	4.0798	0.509	100	1400.69	1399.69	-0.4	7.98701e+06	1	10.9483	7.41	56.8	2	K.AVVGDAQYHHFR.H
*	2016-11-16-hjk-Sharma-Shalini-SL3-wt.5102.5102.2	1.7719	0.2859	99.3	862.538	862.537	1.3	7090890	1	6.80148	12	63.6	2	R.HRLPLAR.V
*	2016-11-16-hjk-Sharma-Shalini-SL3-wt.19799.19799.2	3.6197	0.6016	100	1485.79	1485.79	-2.1	4.54779e+06	1	12.0239	4.14	66.7	3	R.LVEVGGDVQLDSVR.I
P62988	4	21	0.566	76	8565	7.2	U	0.0138085	2.68129	Ubiquitin OS=Homo sapiens GN=RPS27A PE=1 SV=1	0	21	0
*	2016-11-16-hjk-Sharma-Shalini-SL3-wt.22306.22306.2	5.2958	0.5718	100	1787.93	1787.93	-0.2	3.94177e+06	1	10.3033	3.96	78.6	3	K.TITLEVEPSDTIENVK.A
*	2016-11-16-hjk-Sharma-Shalini-SL3-wt.6865.6865.2	1.9739	0.5389	100	1039.51	1039.52	-1.9	1.41795e+06	1	10.6227	4.46	56.2	15	K.EGIPPDQQR.L
*	2016-11-16-hjk-Sharma-Shalini-SL3-wt.11620.11620.2	2.1266	0.4983	100	1081.55	1081.55	0	8316641	1	10.2747	6.56	62.5	1	R.TLSDYNIQK.E
*	2016-11-16-hjk-Sharma-Shalini-SL3-wt.16637.16637.2	2.8355	0.5948	100	1067.62	1067.62	-0.5	4.86143e+06	1	12.6405	7.33	81.2	2	K.ESTLHLVLR.L
P05455	30	43	0.564	408	46837	7.1	U	0.00526684	2.66438	Lupus La protein OS=Homo sapiens GN=SSB PE=1 SV=2	0	43	0
*	2016-11-16-hjk-Sharma-Shalini-SL3-wt.27256.27256.2	6.0972	0.7115	100	2071.97	2071.97	-0.5	4.18198e+06	1	21.3178	5.63	85.7	1	K.ICHQIEYYFGDFNLPR.D
*	2016-11-16-hjk-Sharma-Shalini-SL3-wt.27242.27242.3	3.628	0.5406	100	2071.97	2071.97	-0.6	14580589	1	13.0641	5.63	35.8	1	K.ICHQIEYYFGDFNLPR.D
*	2016-11-16-hjk-Sharma-Shalini-SL3-wt.12780.12780.2	4.343	0.6141	100	1379.67	1379.67	-2.6	3.86267e+06	1	12.8052	4.4	89.5	1	K.SKAELMEISEDK.T
*	2016-11-16-hjk-Sharma-Shalini-SL3-wt.15894.15894.2	2.479	0.5612	100	1164.54	1164.55	-0.5	8757195	1	11.1612	3.96	66.7	1	K.AELMEISEDK.T
*	2016-11-16-hjk-Sharma-Shalini-SL3-wt.10584.10584.3	4.8575	0.4897	100	1745.91	1745.91	-1	5261099	1	10.8069	6.56	48	1	R.RSPSKPLPEVTDEYK.N
*	2016-11-16-hjk-Sharma-Shalini-SL3-wt.12819.12819.2	4.8231	0.6387	100	1589.8	1589.81	-1	5420163	1	14.9377	4.72	83.3	2	R.SPSKPLPEVTDEYK.N
*	2016-11-16-hjk-Sharma-Shalini-SL3-wt.12817.12817.3	2.6604	0.6199	100	1589.81	1589.81	0.2	7.28431e+06	1	11.6311	4.72	24.4	1	R.SPSKPLPEVTDEYK.N
*	2016-11-16-hjk-Sharma-Shalini-SL3-wt.13103.13103.3	6.5044	0.574	100	2046.04	2046.04	-0.2	2277793	1	12.5298	4.89	59.3	2	R.SPSKPLPEVTDEYKNDVK.N
*	2016-11-16-hjk-Sharma-Shalini-SL3-wt.16218.16218.2	1.8982	0.629	100	1190.59	1190.59	-0.8	20914750	1	15.4719	4.14	56.2	1	K.PLPEVTDEYK.N
*	2016-11-16-hjk-Sharma-Shalini-SL3-wt.21759.21759.2	2.5679	0.3357	99.9	1292.64	1292.64	-0.7	3354390	1	8.84777	4.14	65	6	K.GFPTDATLDDIK.E
*	2016-11-16-hjk-Sharma-Shalini-SL3-wt.22964.22964.3	3.7733	0.4121	100	1858.95	1858.95	1.4	3.61091e+06	1	6.73676	4.72	39.6	1	K.EWLEDKGQVLNIQMR.R
*	2016-11-16-hjk-Sharma-Shalini-SL3-wt.17542.17542.2	2.0965	0.4584	100	1058.58	1058.58	0.5	2.6147e+06	1	9.296	10.06	64.3	1	K.GQVLNIQMR.R
*	2016-11-16-hjk-Sharma-Shalini-SL3-wt.27968.27968.2	4.165	0.603	100	1626.87	1626.87	-2.3	1.42844e+06	1	11.6465	6.56	66.7	3	K.GSIFVVFDSIESAKK.F
*	2016-11-16-hjk-Sharma-Shalini-SL3-wt.5665.5665.2	2.9731	0.4645	100	1033.57	1033.57	0	43035324	1	7.46861	8.8	87.5	3	K.KFVETPGQK.Y
*	2016-11-16-hjk-Sharma-Shalini-SL3-wt.6570.6570.2	1.7371	0.4684	99.7	905.471	905.473	-2.4	10060571	1	8.83022	6.56	64.3	1	K.FVETPGQK.Y
*	2016-11-16-hjk-Sharma-Shalini-SL3-wt.27539.27539.2	3.3464	0.4228	100	1382.79	1382.79	0.4	7.45662e+06	1	12.553	6.56	94.4	1	K.YKETDLLILFK.D
*	2016-11-16-hjk-Sharma-Shalini-SL3-wt.29363.29363.3	2.6489	0.3939	99.2	2122.12	2122.11	2.4	468569	1	7.79445	4.89	30	1	K.YKETDLLILFKDDYFAK.K
*	2016-11-16-hjk-Sharma-Shalini-SL3-wt.6525.6525.2	2.416	0.5203	100	1220.58	1220.58	-2.1	50118056	1	12.1952	4.4	68.8	1	K.QKLEEDAEMK.S
*	2016-11-16-hjk-Sharma-Shalini-SL3-wt.6515.6515.3	2.5659	0.4018	99.9	1220.58	1220.58	-0.9	6409413	1	9.14498	4.4	38.2	1	K.QKLEEDAEMK.S
*	2016-11-16-hjk-Sharma-Shalini-SL3-wt.10528.10528.2	3.7609	0.7123	100	1313.54	1313.54	-1.4	8792727	1	12.8066	4.14	75	1	K.FSGDLDDQTCR.E
*	2016-11-16-hjk-Sharma-Shalini-SL3-wt.23989.23989.3	6.3509	0.5772	100	2946.36	2946.37	-3	1.5423e+06	1	14.0444	4.7	32.4	1	K.FSGDLDDQTCREDLHILFSNHGEIK.W
*	2016-11-16-hjk-Sharma-Shalini-SL3-wt.22505.22505.2	1.3674	0.4242	99.4	835.447	835.446	0.4	1571116	1	6.08249	6.56	70	2	K.WIDFVR.G
*	2016-11-16-hjk-Sharma-Shalini-SL3-wt.22243.22243.2	1.7211	0.2512	99.4	819.497	819.497	0.1	3.9154e+06	1	6.2813	6.56	66.7	1	K.EGIILFK.E
*	2016-11-16-hjk-Sharma-Shalini-SL3-wt.9898.9898.2	2.6925	0.5188	100	1114.56	1114.56	-1.3	6904074	1	9.97548	6.56	55.6	1	K.DANNGNLQLR.N
*	2016-11-16-hjk-Sharma-Shalini-SL3-wt.26209.26209.2	4.1623	0.5924	100	1546.76	1546.76	-0.5	6.06957e+06	1	11.8222	3.86	77.3	2	K.EVTWEVLEGEVEK.E
*	2016-11-16-hjk-Sharma-Shalini-SL3-wt.7366.7366.2	5.68	0.4218	100	1444.76	1444.76	-1.1	4.35272e+06	1	10.3406	4.72	100	1	K.KIIEDQQESLNK.W
*	2016-11-16-hjk-Sharma-Shalini-SL3-wt.7402.7402.3	2.2652	0.4832	100	1444.76	1444.76	-0.3	13335724	1	7.6465	4.72	33.3	1	K.KIIEDQQESLNK.W
*	2016-11-16-hjk-Sharma-Shalini-SL3-wt.8866.8866.2	3.2713	0.2984	99.9	1316.66	1316.67	-3.5	4632951	1	8.2509	4.14	75	1	K.IIEDQQESLNK.W
*	2016-11-16-hjk-Sharma-Shalini-SL3-wt.6202.6202.3	4.0686	0.8196	100	2169.89	2169.9	-0.8	1.23751e+06	1	13.142	4.28	42.4	1	K.FASDDEHDEHDENGATGPVK.R
*	2016-11-16-hjk-Sharma-Shalini-SL3-wt.2138.2138.3	3.3084	0.3639	100	1489.71	1489.71	-1.1	1.56075e+06	1	9.04983	4.57	53.8	1	R.AREETDKEEPASK.Q
P01842	5	18	0.562	105	11237	7.2	U	0.00856693	2.64754	Ig lambda chain C regions OS=Homo sapiens GN=IGLC1 PE=1 SV=1	0	18	0
	2016-11-16-hjk-Sharma-Shalini-SL3-wt.23045.23045.2	4.38	0.6512	100	1986.02	1986.02	-0.8	5.78156e+06	1	12.4133	4.46	70	12	K.AAPSVTLFPPSSEELQANK.A
*	2016-11-16-hjk-Sharma-Shalini-SL3-wt.4258.4258.2	2.8287	0.5477	100	990.512	990.51	1.7	528839	1	9.34218	6.56	76.5	2	K.AGVETTTPSK.Q
	2016-11-16-hjk-Sharma-Shalini-SL3-wt.25597.25597.2	4.5822	0.5095	100	1743.86	1743.86	0.8	2532972	1	15.2051	6.56	76.9	2	K.YAASSYLSLTPEQWK.S
	2016-11-16-hjk-Sharma-Shalini-SL3-wt.7300.7300.2	4.9678	0.6664	100	1711.76	1711.76	-1.1	3.14508e+06	1	12.1032	5.63	73.1	1	R.SYSCQVTHEGSTVEK.T
	2016-11-16-hjk-Sharma-Shalini-SL3-wt.7298.7298.3	2.7653	0.6226	100	1711.76	1711.76	-0.7	5403183	1	13.8099	5.63	31.9	1	R.SYSCQVTHEGSTVEK.T
P04259	42	93	0.557	564	60067	8	U	0.00824036	2.60579	Keratin, type II cytoskeletal 6B OS=Homo sapiens GN=KRT6B PE=1 SV=5	0	93	0
	2016-11-16-hjk-Sharma-Shalini-SL3-wt.4048.4048.2	2.3164	0.3639	100	965.491	965.491	-0.2	2.30025e+06	1	7.46512	12	68.8	1	R.RGFSANSAR.L
	2016-11-16-hjk-Sharma-Shalini-SL3-wt.14526.14526.2	2.7487	0.5983	100	1026.52	1026.52	-0.7	8.25066e+06	1	15.146	10.06	76.5	1	R.SGFSSISVSR.S
	2016-11-16-hjk-Sharma-Shalini-SL3-wt.9428.9428.3	3.3746	0.6213	100	1667.77	1667.77	-0.4	4837368	1	13.1879	10.28	33.8	1	R.SRGSGGLGGACGGAGFGSR.S
	2016-11-16-hjk-Sharma-Shalini-SL3-wt.11922.11922.2	3.9191	0.7165	100	1424.63	1424.63	-1.7	3.23496e+06	1	14.6685	8.26	72.4	2	R.GSGGLGGACGGAGFGSR.S
	2016-11-16-hjk-Sharma-Shalini-SL3-wt.13780.13780.2	1.7903	0.3897	99.8	881.473	881.473	-0.1	8947005	1	10.23	8.8	60	1	R.SLYGLGGSK.R
	2016-11-16-hjk-Sharma-Shalini-SL3-wt.16623.16623.2	4.1647	0.7234	100	1598.76	1598.76	-1.3	7.85624e+06	1	19.6784	8.26	50	1	R.ISIGGGSCAISGGYGSR.A
	2016-11-16-hjk-Sharma-Shalini-SL3-wt.8757.8757.2	2.9393	0.2732	100	1161.64	1161.64	-0.1	6074891	1	6.4117	9.08	78.6	2	K.VRFLEQQNK.V
	2016-11-16-hjk-Sharma-Shalini-SL3-wt.19209.19209.2	2.9622	0.5909	100	1203.63	1203.64	-1.6	80308432	1	10.0863	6.56	70.6	3	K.WTLLQEQGTK.T
	2016-11-16-hjk-Sharma-Shalini-SL3-wt.7472.7472.2	2.5302	0.2655	99.9	945.51	945.511	-1	15984057	1	6.04861	6.56	84.6	1	R.GRLDSELR.N
	2016-11-16-hjk-Sharma-Shalini-SL3-wt.24157.24157.2	2.4711	0.393	100	1204.59	1204.59	0.3	1.71597e+06	1	7.07751	4.14	61.1	1	R.NMQDLVEDLK.N
	2016-11-16-hjk-Sharma-Shalini-SL3-wt.6462.6462.2	2.9911	0.5565	100	1152.55	1152.55	0.1	89265408	1	10.1178	4.72	81.2	1	K.NKYEDEINK.R
	2016-11-16-hjk-Sharma-Shalini-SL3-wt.6406.6406.2	2.7562	0.5278	100	1308.65	1308.65	-2.1	218422688	1	8.88493	6.56	75	1	K.NKYEDEINKR.T
	2016-11-16-hjk-Sharma-Shalini-SL3-wt.6396.6396.3	3.826	0.442	100	1308.65	1308.65	-0.8	684676670	1	8.44799	6.56	65.6	2	K.NKYEDEINKR.T
	2016-11-16-hjk-Sharma-Shalini-SL3-wt.6344.6344.2	1.8136	0.3485	99.8	910.415	910.415	0.3	23378344	1	10.7076	4.14	66.7	1	K.YEDEINK.R
	2016-11-16-hjk-Sharma-Shalini-SL3-wt.4918.4918.2	2.0152	0.7003	100	1066.51	1066.52	-1.6	27652036	1	13.662	4.72	71.4	1	K.YEDEINKR.T
	2016-11-16-hjk-Sharma-Shalini-SL3-wt.14533.14533.3	3.052	0.4635	100	1378.73	1378.73	-2	2.75268e+06	1	7.94562	6.56	33.3	1	K.RTAAENEFVTLK.K
	2016-11-16-hjk-Sharma-Shalini-SL3-wt.10776.10776.3	3.5582	0.504	100	1506.82	1506.83	-2.8	14152602	1	8.82306	8.8	57.9	1	K.RTAAENEFVTLKK.D
	2016-11-16-hjk-Sharma-Shalini-SL3-wt.17677.17677.2	2.6549	0.2809	99.9	1222.63	1222.63	0.3	3.19592e+06	1	9.48217	4.46	63.2	2	R.TAAENEFVTLK.K
	2016-11-16-hjk-Sharma-Shalini-SL3-wt.13223.13223.2	3.1001	0.5287	100	1350.72	1350.73	-2.3	6551722	1	10.8852	6.56	70	1	R.TAAENEFVTLKK.D
	2016-11-16-hjk-Sharma-Shalini-SL3-wt.10031.10031.2	2.2999	0.6169	100	1026.46	1026.46	2	4157698	1	12.53	4.46	68.8	2	K.DVDAAYMNK.V
	2016-11-16-hjk-Sharma-Shalini-SL3-wt.27243.27243.2	3.3175	0.4067	100	1407.71	1407.71	-1	7.80913e+06	1	7.7707	4.14	75	1	K.ADTLTDEINFLR.A
	2016-11-16-hjk-Sharma-Shalini-SL3-wt.28081.28081.3	3.7901	0.5819	100	3038.43	3038.42	2.2	208134	1	12.4441	4.4	17.2	1	R.ALYDAELSQMQTHISDTSVVLSMDNNR.N
	2016-11-16-hjk-Sharma-Shalini-SL3-wt.24791.24791.2	3.1022	0.4081	100	1329.72	1329.73	-1.4	3.93014e+06	1	9.92235	4.14	59.1	1	R.NLDLDSIIAEVK.A
	2016-11-16-hjk-Sharma-Shalini-SL3-wt.9450.9450.2	2.3777	0.453	100	1107.54	1107.54	-0.2	5.50364e+06	1	8.62727	4.46	80	2	K.AQYEEIAQR.S
	2016-11-16-hjk-Sharma-Shalini-SL3-wt.10615.10615.2	3.9886	0.5015	100	1455.69	1455.69	0.3	36121908	1	9.71627	6.56	80	1	R.SRAEAESWYQTK.Y
	2016-11-16-hjk-Sharma-Shalini-SL3-wt.10606.10606.3	2.7459	0.6155	100	1455.69	1455.69	0.2	5359364	1	12.7882	6.56	38.9	1	R.SRAEAESWYQTK.Y
	2016-11-16-hjk-Sharma-Shalini-SL3-wt.12771.12771.2	3.114	0.6128	100	1212.55	1212.55	-2.1	2.46733e+06	1	13.4384	4.46	76.5	1	R.AEAESWYQTK.Y
	2016-11-16-hjk-Sharma-Shalini-SL3-wt.15750.15750.2	2.8964	0.4108	100	1179.6	1179.6	-1.3	92117264	1	11.6801	4.46	72.2	43	K.YEELQITAGR.H
	2016-11-16-hjk-Sharma-Shalini-SL3-wt.8125.8125.2	3.0863	0.475	100	1315.69	1315.7	-2.1	1.47857e+06	1	9.56296	6.56	68.4	1	R.NTKQEIAEINR.M
	2016-11-16-hjk-Sharma-Shalini-SL3-wt.9156.9156.2	2.1109	0.4592	99.8	972.508	972.511	-3.1	10093918	1	7.28288	4.46	71.4	1	K.QEIAEINR.M
	2016-11-16-hjk-Sharma-Shalini-SL3-wt.4825.4825.2	2.1886	0.3025	99.9	1096.61	1096.61	-0.1	4.26624e+06	1	7.26267	7.33	73.3	1	R.LRSEIDHVK.K
	2016-11-16-hjk-Sharma-Shalini-SL3-wt.3673.3673.3	3.2967	0.2525	99.9	1224.7	1224.71	-1	5772001	1	7.36063	8.8	59.4	1	R.LRSEIDHVKK.Q
	2016-11-16-hjk-Sharma-Shalini-SL3-wt.25579.25579.3	5.724	0.5675	100	2416.21	2416.21	0.9	1.10308e+06	1	10.1475	6.56	38.8	1	K.KQCANLQAAIADAEQRGEMALK.D
	2016-11-16-hjk-Sharma-Shalini-SL3-wt.21141.21141.2	4.6967	0.3449	100	1658.79	1658.79	1	3857343	1	12.3574	4.46	71.4	1	K.QCANLQAAIADAEQR.G
	2016-11-16-hjk-Sharma-Shalini-SL3-wt.27537.27537.3	6.3813	0.6678	100	2288.11	2288.11	1.1	3.63346e+06	1	13.1831	4.72	44.8	2	K.QCANLQAAIADAEQRGEMALK.D
	2016-11-16-hjk-Sharma-Shalini-SL3-wt.18076.18076.2	3.0335	0.4471	100	1357.73	1357.73	-0.4	4.14721e+06	1	7.56721	4.72	71.4	1	K.NKLEGLEDALQK.A
	2016-11-16-hjk-Sharma-Shalini-SL3-wt.18602.18602.2	2.7962	0.4917	100	1115.59	1115.59	-1.3	4827160	1	9.04637	4.14	72.2	1	K.LEGLEDALQK.A
	2016-11-16-hjk-Sharma-Shalini-SL3-wt.16151.16151.2	2.2049	0.3243	99.8	1153.55	1153.56	-0.7	43937104	1	8.74787	4.46	56.2	1	K.EYQELMNVK.L
	2016-11-16-hjk-Sharma-Shalini-SL3-wt.24334.24334.2	3.1073	0.5248	100	1263.69	1263.69	-1.2	974869	1	11.7616	4.46	65	1	K.LALDVEIATYR.K
	2016-11-16-hjk-Sharma-Shalini-SL3-wt.6363.6363.2	3.0832	0.5511	100	1133.56	1133.56	-0.4	3.05256e+06	1	9.82855	4.72	81.2	1	R.KLLEGEECR.L
	2016-11-16-hjk-Sharma-Shalini-SL3-wt.7496.7496.2	2.0621	0.3026	99.7	1005.47	1005.47	-1	23355362	1	13.9021	4.14	57.1	1	K.LLEGEECR.L
*	2016-11-16-hjk-Sharma-Shalini-SL3-wt.11379.11379.2	3.9077	0.5584	100	1435.74	1435.74	-0.6	3.30033e+06	1	10.8131	9.08	65.5	1	R.ATGGGLSSVGGGSSTIK.Y
P31947	19	23	0.552	248	27774	4.7	U	0.00463466	2.56451	14-3-3 protein sigma OS=Homo sapiens GN=SFN PE=1 SV=1	0	23	0
	2016-11-16-hjk-Sharma-Shalini-SL3-wt.3510.3510.2	2.0684	0.1479	99.2	816.422	816.421	1	1.01036e+06	1	6.57676	4.46	66.7	1	K.LAEQAER.Y
*	2016-11-16-hjk-Sharma-Shalini-SL3-wt.22149.22149.2	5.3991	0.5668	100	1902.87	1902.87	-1	9172373	1	11.1795	4.4	72.4	1	K.LAEQAERYEDMAAFMK.G
*	2016-11-16-hjk-Sharma-Shalini-SL3-wt.22140.22140.3	3.6803	0.5269	100	1902.87	1902.87	-2.2	9669491	1	8.75851	4.4	38.9	1	K.LAEQAERYEDMAAFMK.G
*	2016-11-16-hjk-Sharma-Shalini-SL3-wt.20772.20772.2	2.2217	0.6762	100	1105.47	1105.47	-0.7	6056570	1	11.6235	4.46	66.7	1	R.YEDMAAFMK.G
*	2016-11-16-hjk-Sharma-Shalini-SL3-wt.6346.6346.2	2.3878	0.6003	100	1108.46	1108.46	0.1	4.20524e+06	1	10.5342	3.96	71.4	1	K.GEELSCEER.N
	2016-11-16-hjk-Sharma-Shalini-SL3-wt.18610.18610.2	1.8252	0.2732	99.2	907.524	907.525	-1.3	7847973	1	7.16393	8.8	57.1	1	R.NLLSVAYK.N
*	2016-11-16-hjk-Sharma-Shalini-SL3-wt.4634.4634.2	4.5887	0.7222	100	1546.7	1546.7	-0.2	1.54406e+06	1	16.1294	4.25	70.8	1	K.SNEEGSEEKGPEVR.E
*	2016-11-16-hjk-Sharma-Shalini-SL3-wt.4632.4632.3	2.9759	0.4154	100	1546.7	1546.7	-0.9	1.29371e+06	1	8.35474	4.25	48.7	1	K.SNEEGSEEKGPEVR.E
	2016-11-16-hjk-Sharma-Shalini-SL3-wt.5300.5300.2	1.5365	0.369	99.6	932.429	932.429	-0.1	8492757	1	7.83687	8.64	58.3	1	K.MKGDYYR.Y
*	2016-11-16-hjk-Sharma-Shalini-SL3-wt.11423.11423.2	2.2992	0.6344	100	1181.57	1181.57	-0.8	75099992	1	12.7806	4.14	63.2	1	R.YLAEVATGDDK.K
*	2016-11-16-hjk-Sharma-Shalini-SL3-wt.8206.8206.2	3.2437	0.5895	100	1309.66	1309.66	-0.3	3.39619e+06	1	10.215	4.72	76.2	2	R.YLAEVATGDDKK.R
*	2016-11-16-hjk-Sharma-Shalini-SL3-wt.8240.8240.3	1.8804	0.411	99.4	1309.66	1309.66	-0.7	3.62063e+06	1	7.52796	4.72	23.8	1	R.YLAEVATGDDKK.R
*	2016-11-16-hjk-Sharma-Shalini-SL3-wt.4124.4124.2	2.4975	0.3635	100	830.484	830.484	-0.5	1.58278e+06	1	6.18194	10.06	100	1	K.RIIDSAR.S
*	2016-11-16-hjk-Sharma-Shalini-SL3-wt.15829.15829.2	2.3862	0.5586	100	1242.56	1242.57	-1.8	5519315	1	13.0516	4.46	70.6	1	R.SAYQEAMDISK.K
*	2016-11-16-hjk-Sharma-Shalini-SL3-wt.13554.13554.2	3.0249	0.5819	100	1370.66	1370.66	0.6	14508419	1	14.9084	6.56	78.9	1	R.SAYQEAMDISKK.E
*	2016-11-16-hjk-Sharma-Shalini-SL3-wt.11826.11826.2	1.6092	0.3068	99.3	1054.54	1054.54	0	4.36436e+06	1	6.87425	6.56	57.1	2	K.EMPPTNPIR.L
*	2016-11-16-hjk-Sharma-Shalini-SL3-wt.28892.28892.2	6.5951	0.7993	100	2173.96	2173.96	0	10842114	1	18.4609	4.25	80	1	K.TTFDEAMADLHTLSEDSYK.D
*	2016-11-16-hjk-Sharma-Shalini-SL3-wt.28853.28853.3	4.8903	0.6658	100	2173.95	2173.96	-2.6	5064528	1	11.0361	4.25	32.1	2	K.TTFDEAMADLHTLSEDSYK.D
*	2016-11-16-hjk-Sharma-Shalini-SL3-wt.24952.24952.2	2.1954	0.6933	99.9	2529.09	2529.1	-4.9	661998	1	12.0248	3.23	40.6	2	R.DNLTLWTADNAGEEGGEAPQEPQS.-
P02545	41	45	0.55	664	74140	7	U	0.00338678	2.54813	Lamin-A/C OS=Homo sapiens GN=LMNA PE=1 SV=1	0	45	0
*	2016-11-16-hjk-Sharma-Shalini-SL3-wt.7961.7961.2	3.6243	0.322	100	1359.68	1359.69	-1.6	2.27188e+06	1	10.6749	10.06	58.3	3	R.SGAQASSTPLSPTR.I
*	2016-11-16-hjk-Sharma-Shalini-SL3-wt.11670.11670.2	1.949	0.5035	100	1131.53	1131.53	0.4	1.89119e+06	1	7.46882	3.96	56.2	1	K.EDLQELNDR.L
*	2016-11-16-hjk-Sharma-Shalini-SL3-wt.10239.10239.2	1.8133	0.4411	99.8	1089.55	1089.55	-0.6	5403840	1	7.26855	4.46	60	1	R.SLETENAGLR.L
*	2016-11-16-hjk-Sharma-Shalini-SL3-wt.8762.8762.2	2.7791	0.5007	100	1148.58	1148.58	1.5	3.68537e+06	1	9.66192	4.14	55.6	1	R.ITESEEVVSR.E
*	2016-11-16-hjk-Sharma-Shalini-SL3-wt.9593.9593.2	3.2467	0.6314	100	1293.64	1293.64	-0.4	5683488	1	11.6457	4.72	85	1	K.AAYEAELGDARK.T
*	2016-11-16-hjk-Sharma-Shalini-SL3-wt.9588.9588.3	2.2768	0.3874	99.9	1293.64	1293.64	-0.5	1.52533e+06	1	6.91955	4.72	30.8	1	K.AAYEAELGDARK.T
*	2016-11-16-hjk-Sharma-Shalini-SL3-wt.8082.8082.2	3.2966	0.4462	100	1171.64	1171.64	-0.3	3352675	1	7.86152	6.56	75	1	K.KEGDLIAAQAR.L
*	2016-11-16-hjk-Sharma-Shalini-SL3-wt.23990.23990.2	2.1546	0.4613	100	1002.55	1002.55	-0.5	2.06518e+06	1	8.22969	4.46	66.7	2	K.DLEALLNSK.E
*	2016-11-16-hjk-Sharma-Shalini-SL3-wt.14409.14409.2	2.6903	0.5506	100	1119.59	1119.59	0	13560321	1	10.2791	4.46	60	1	K.EAALSTALSEK.R
*	2016-11-16-hjk-Sharma-Shalini-SL3-wt.14273.14273.3	3.3284	0.3848	100	1338.71	1338.71	-0.1	7.89663e+06	1	9.49997	5.8	52.8	1	K.RTLEGELHDLR.G
*	2016-11-16-hjk-Sharma-Shalini-SL3-wt.16573.16573.4	4.6052	0.5061	100	1821.99	1821.99	-0.4	1.55054e+06	1	8.71393	7.33	22.6	1	K.RTLEGELHDLRGQVAK.L
*	2016-11-16-hjk-Sharma-Shalini-SL3-wt.9507.9507.2	2.18	0.3002	99.8	901.498	901.499	-1	11097716	1	7.38773	4.46	68.8	1	K.LEAALGEAK.K
*	2016-11-16-hjk-Sharma-Shalini-SL3-wt.6493.6493.2	2.5756	0.3218	100	1029.59	1029.59	-0.6	8404714	1	7.95242	6.56	72.2	1	K.LEAALGEAKK.Q
*	2016-11-16-hjk-Sharma-Shalini-SL3-wt.14137.14137.2	2.4149	0.395	100	1032.51	1032.51	-0.5	3488976	1	7.90881	4.46	71.4	1	K.QLQDEMLR.R
*	2016-11-16-hjk-Sharma-Shalini-SL3-wt.16277.16277.2	4.5744	0.5661	100	1509.76	1509.76	0.3	1.45184e+06	1	10.7778	4.72	76.2	1	R.LQTMKEELDFQK.N
*	2016-11-16-hjk-Sharma-Shalini-SL3-wt.16273.16273.3	3.1249	0.2906	100	1509.76	1509.76	-0.2	3259707	1	5.99063	4.72	33.3	1	R.LQTMKEELDFQK.N
*	2016-11-16-hjk-Sharma-Shalini-SL3-wt.12336.12336.2	1.8178	0.3462	99.7	908.435	908.436	-0.7	8490833	1	6.04359	4.14	66.7	1	K.EELDFQK.N
*	2016-11-16-hjk-Sharma-Shalini-SL3-wt.18780.18780.2	2.7524	0.4333	100	1028.57	1028.57	0.4	5756347	1	8.71729	4.46	68.8	1	R.LADALQELR.A
*	2016-11-16-hjk-Sharma-Shalini-SL3-wt.5432.5432.2	4.3382	0.7474	100	1374.63	1374.63	-1.5	1832427	1	19.9664	4.72	100	1	R.AQHEDQVEQYK.K
*	2016-11-16-hjk-Sharma-Shalini-SL3-wt.3984.3984.2	4.8651	0.4439	100	1502.72	1502.72	-1.6	1.69804e+06	1	16.5949	5.8	100	1	R.AQHEDQVEQYKK.E
*	2016-11-16-hjk-Sharma-Shalini-SL3-wt.3956.3956.3	4.6962	0.3557	100	1502.72	1502.72	-0.8	1.48531e+06	1	11.2014	5.8	58.3	1	R.AQHEDQVEQYKK.E
*	2016-11-16-hjk-Sharma-Shalini-SL3-wt.14579.14579.2	5.7173	0.6621	100	1752.86	1752.86	-2.6	10403270	1	16.6922	5.63	96.4	1	R.NSNLVGAAHEELQQSR.I
*	2016-11-16-hjk-Sharma-Shalini-SL3-wt.14588.14588.3	4.5485	0.6691	100	1752.86	1752.86	-0.8	2.82598e+06	1	12.2075	5.63	45.1	1	R.NSNLVGAAHEELQQSR.I
*	2016-11-16-hjk-Sharma-Shalini-SL3-wt.23490.23490.2	4.5926	0.343	100	1699.97	1699.97	1.1	3.17444e+06	1	7.14163	9.08	66.7	1	R.IRIDSLSAQLSQLQK.Q
*	2016-11-16-hjk-Sharma-Shalini-SL3-wt.23488.23488.3	3.0109	0.4116	99.9	1699.97	1699.97	-1.8	6620693	1	6.76807	9.08	34.9	1	R.IRIDSLSAQLSQLQK.Q
*	2016-11-16-hjk-Sharma-Shalini-SL3-wt.22071.22071.2	3.7704	0.4443	100	1430.79	1430.78	1	7.81458e+06	1	8.81952	6.56	75	1	R.IDSLSAQLSQLQK.Q
*	2016-11-16-hjk-Sharma-Shalini-SL3-wt.13792.13792.2	2.9837	0.4431	100	1187.64	1187.64	-0.5	10422335	1	7.3682	4.72	76.5	1	K.LRDLEDSLAR.E
*	2016-11-16-hjk-Sharma-Shalini-SL3-wt.5425.5425.2	2.5043	0.4877	100	1051.47	1051.47	-0.5	2.45885e+06	1	7.83064	4.72	92.3	1	K.EREMAEMR.A
*	2016-11-16-hjk-Sharma-Shalini-SL3-wt.27312.27312.2	5.7195	0.5914	100	1894.93	1893.93	-2	3940192	1	10.0912	3.96	69.2	1	R.MQQQLDEYQELLDIK.L
	2016-11-16-hjk-Sharma-Shalini-SL3-wt.7416.7416.2	1.7409	0.3788	99.6	974.477	974.479	-1.5	4.80695e+06	1	8.28847	3.96	50	1	K.LLEGEEER.L
*	2016-11-16-hjk-Sharma-Shalini-SL3-wt.2914.2914.2	1.6384	0.3967	99.7	919.438	919.438	0.1	759961	1	6.6623	10.06	69.2	1	R.SSFSQHAR.T
*	2016-11-16-hjk-Sharma-Shalini-SL3-wt.9366.9366.2	3.3113	0.5394	100	1203.57	1203.57	-1.1	6561499	1	12.7594	3.86	73.7	1	R.VAVEEVDEEGK.F
*	2016-11-16-hjk-Sharma-Shalini-SL3-wt.17661.17661.2	4.3048	0.5375	100	1536.67	1536.67	-0.2	3273784	1	10.8716	4.46	69.6	1	K.SNEDQSMGNWQIK.R
*	2016-11-16-hjk-Sharma-Shalini-SL3-wt.14723.14723.2	3.8017	0.5626	100	1447.73	1447.73	-2.4	3.93427e+06	1	10.8675	6.56	81.8	1	K.RQNGDDPLLTYR.F
*	2016-11-16-hjk-Sharma-Shalini-SL3-wt.14709.14709.3	3.2694	0.427	99.9	1447.73	1447.73	-2.4	1.9252e+06	1	9.43315	6.56	54.3	1	K.RQNGDDPLLTYR.F
*	2016-11-16-hjk-Sharma-Shalini-SL3-wt.26835.26835.3	5.1729	0.5211	100	2533.32	2533.32	-1.8	1.28853e+06	1	12.9384	7.33	32.5	2	K.AGQVVTIWAAGAGATHSPPTDLVWK.A
*	2016-11-16-hjk-Sharma-Shalini-SL3-wt.12101.12101.2	3.3016	0.6709	100	1363.62	1363.62	0.5	3129925	1	14.0269	8.26	68.4	1	K.AQNTWGCGNSLR.T
*	2016-11-16-hjk-Sharma-Shalini-SL3-wt.14017.14017.2	3.9264	0.5362	100	1619.84	1619.84	0.7	3.38693e+06	1	11.9633	6.56	65.4	1	R.TALINSTGEEVAMRK.L
*	2016-11-16-hjk-Sharma-Shalini-SL3-wt.14000.14000.3	3.5792	0.4614	100	1619.84	1619.84	-0.5	2952601	1	9.49875	6.56	35.8	1	R.TALINSTGEEVAMRK.L
*	2016-11-16-hjk-Sharma-Shalini-SL3-wt.13850.13850.2	6.6638	0.7036	100	2365.16	2365.16	1.3	1.21607e+06	1	17.4894	10.06	63.4	1	K.ASASGSGAQVGGPISSGSSASSVTVTR.S
*	2016-11-16-hjk-Sharma-Shalini-SL3-wt.16626.16626.2	3.9739	0.6658	100	1566.75	1566.75	-1.2	4550045	1	13.6148	6.56	65.5	1	R.SVGGSGGGSFGDNLVTR.S
P27482	8	9	0.55	149	16891	4.4	U	0.00301855	2.54813	Calmodulin-like protein 3 OS=Homo sapiens GN=CALML3 PE=1 SV=2	0	9	0
	2016-11-16-hjk-Sharma-Shalini-SL3-wt.22646.22646.2	2.1988	0.5073	100	956.472	956.472	-0.5	2.51085e+06	1	9.83051	4.46	57.1	2	K.EAFSLFDK.D
	2016-11-16-hjk-Sharma-Shalini-SL3-wt.10162.10162.2	1.8094	0.283	99.7	805.424	805.424	0	8809110	1	5.40959	6.56	66.7	1	R.ELGTVMR.S
*	2016-11-16-hjk-Sharma-Shalini-SL3-wt.12700.12700.2	2.9114	0.6432	100	1314.66	1314.66	-0.7	11756932	1	12.8981	4.46	61.9	1	R.SLGQNPTEAELR.D
*	2016-11-16-hjk-Sharma-Shalini-SL3-wt.14937.14937.3	2.6041	0.5103	99.9	1882.86	1882.86	-1.3	3.50398e+06	1	9.08767	4.42	31.5	1	K.MKDTDNEEEIREAFR.V
*	2016-11-16-hjk-Sharma-Shalini-SL3-wt.17301.17301.2	2.3505	0.4421	99.9	1623.72	1623.72	-1.4	4.50912e+06	1	5.5992	4.12	56.5	1	K.DTDNEEEIREAFR.V
*	2016-11-16-hjk-Sharma-Shalini-SL3-wt.19305.19305.2	2.8415	0.5817	100	1235.6	1235.6	-1.3	5.24276e+06	1	11.3583	4.46	63.6	1	K.DGNGFVSAAELR.H
*	2016-11-16-hjk-Sharma-Shalini-SL3-wt.20461.20461.2	3.6558	0.5378	100	1335.61	1335.61	-0.4	3.98136e+06	1	10.8076	3.86	70	1	K.LSDEEVDEMIR.A
*	2016-11-16-hjk-Sharma-Shalini-SL3-wt.20776.20776.2	6.3146	0.7753	100	1885.82	1885.82	0	4.11405e+06	1	18.342	3.86	75.9	1	R.AADTDGDGQVNYEEFVR.V
Q15365	12	14	0.548	356	37498	7.1	U	0.00196526	2.53183	Poly(rC)-binding protein 1 OS=Homo sapiens GN=PCBP1 PE=1 SV=2	0	14	0
	2016-11-16-hjk-Sharma-Shalini-SL3-wt.11012.11012.2	1.7241	0.4102	99.8	802.467	802.467	-0.1	6.84141e+06	1	5.67162	6.56	57.1	1	K.EVGSIIGK.K
	2016-11-16-hjk-Sharma-Shalini-SL3-wt.9807.9807.2	3.0796	0.6081	100	1288.59	1288.6	-1.1	8797511	1	15.2848	4.46	60	2	R.INISEGNCPER.I
*	2016-11-16-hjk-Sharma-Shalini-SL3-wt.25664.25664.2	3.1727	0.5063	100	1388.81	1388.81	-0.4	2.32961e+06	1	12.2073	9.08	62.5	2	R.IITLTGPTNAIFK.A
*	2016-11-16-hjk-Sharma-Shalini-SL3-wt.19092.19092.2	2.8767	0.4159	100	1442.8	1442.8	-0.3	7201427	1	11.8638	8.26	56.5	1	R.LVVPATQCGSLIGK.G
	2016-11-16-hjk-Sharma-Shalini-SL3-wt.18627.18627.2	4.9234	0.5156	100	2089.98	2089.98	-1.5	4916731	1	13.0881	4.14	66.7	1	R.ESTGAQVQVAGDMLPNSTER.A
*	2016-11-16-hjk-Sharma-Shalini-SL3-wt.22136.22136.2	4.2466	0.616	100	1672.89	1672.89	-2.2	4421563	1	10.8257	6.56	74.1	1	R.AITIAGVPQSVTECVK.Q
*	2016-11-16-hjk-Sharma-Shalini-SL3-wt.24175.24175.2	4.0622	0.5915	100	2475.19	2475.18	1.6	1.48526e+06	1	12.5572	6.56	43.2	1	R.VMTIPYQPMPASSPVICAGGQDR.C
*	2016-11-16-hjk-Sharma-Shalini-SL3-wt.24437.24437.5	4.2616	0.5371	100	3945.87	3945.87	0.7	740489	1	9.6946	4.95	11.3	1	R.CSDAAGYPHATHDLEGPPLDAYSIQGQHTISPLDLAK.L
*	2016-11-16-hjk-Sharma-Shalini-SL3-wt.18366.18366.4	2.9126	0.3744	99.9	2606.18	2606.18	0.1	2.60881e+06	1	5.73921	6.51	15.6	1	R.QQSHFAMMHGGTGFAGIDSSSPEVK.G
*	2016-11-16-hjk-Sharma-Shalini-SL3-wt.9690.9690.2	2.4505	0.4218	100	1014.53	1014.53	-1	11781181	1	9.49322	6.56	68.8	1	R.QGANINEIR.Q
	2016-11-16-hjk-Sharma-Shalini-SL3-wt.5392.5392.2	1.6621	0.2573	99.2	862.445	862.445	-0.1	1.89073e+06	1	5.29907	9.08	64.3	1	R.QMSGAQIK.I
*	2016-11-16-hjk-Sharma-Shalini-SL3-wt.8044.8044.2	1.7997	0.4294	99.8	1086.55	1086.55	0.3	6.03428e+06	1	8.84897	6.56	50	1	K.IANPVEGSSGR.Q
P60709	28	47	0.539	375	41737	5.5	U	0.00626338	2.45939	Actin, cytoplasmic 1 OS=Homo sapiens GN=ACTB PE=1 SV=1	0	47	0
P63261	28	47	0.539	375	41793	5.5	U	0.00626338	2.45939	Actin, cytoplasmic 2 OS=Homo sapiens GN=ACTG1 PE=1 SV=1	0	47	0
	2016-11-16-hjk-Sharma-Shalini-SL3-wt.8084.8084.2	2.246	0.5206	99.7	976.443	976.448	-5.6	6.63719e+06	1	10.0675	4.46	76.5	1	K.AGFAGDDAPR.A
	2016-11-16-hjk-Sharma-Shalini-SL3-wt.20530.20530.2	1.8857	0.4797	100	945.552	945.552	-0.1	2147811	1	8.40878	10.06	60	2	R.AVFPSIVGR.P
	2016-11-16-hjk-Sharma-Shalini-SL3-wt.17165.17165.2	1.4334	0.4237	99	1198.7	1198.71	-1.3	26844022	1	7.12139	12	44.4	1	R.AVFPSIVGRPR.H
	2016-11-16-hjk-Sharma-Shalini-SL3-wt.17013.17013.3	2.1475	0.4785	99.9	1198.7	1198.71	-0.8	8.27624e+06	1	8.88189	12	42.4	2	R.AVFPSIVGRPR.H
	2016-11-16-hjk-Sharma-Shalini-SL3-wt.7617.7617.2	3.4685	0.6235	100	1171.57	1171.57	-0.4	8793442	1	13.3467	9.08	95	2	R.HQGVMVGMGQK.D
	2016-11-16-hjk-Sharma-Shalini-SL3-wt.6618.6618.2	2.4827	0.6672	100	1198.52	1198.52	-2.4	5.38891e+06	1	12.6307	4.14	66.7	1	K.DSYVGDEAQSK.R
	2016-11-16-hjk-Sharma-Shalini-SL3-wt.5609.5609.2	2.5828	0.6399	100	1354.62	1354.62	-0.5	2908163	1	12.6939	4.72	65	1	K.DSYVGDEAQSKR.G
	2016-11-16-hjk-Sharma-Shalini-SL3-wt.11902.11902.2	2.2768	0.0884	99.5	800.535	800.535	-0.2	12861719	1	5.12345	10.99	91.7	1	K.RGILTLK.Y
	2016-11-16-hjk-Sharma-Shalini-SL3-wt.14780.14780.2	3.0683	0.6172	100	1515.75	1515.75	-2.3	7300082	1	12.1458	7.41	66.7	1	K.IWHHTFYNELR.V
	2016-11-16-hjk-Sharma-Shalini-SL3-wt.14766.14766.3	3.3403	0.5623	100	1515.75	1515.75	-1	28410200	1	9.1464	7.41	43.2	4	K.IWHHTFYNELR.V
	2016-11-16-hjk-Sharma-Shalini-SL3-wt.19590.19590.2	5.3405	0.2699	100	1954.06	1954.06	-1.1	15471607	1	12.9102	4.72	83.3	2	R.VAPEEHPVLLTEAPLNPK.A
	2016-11-16-hjk-Sharma-Shalini-SL3-wt.19678.19678.3	2.9636	0.1587	99.6	1954.06	1954.06	-0.2	89294952	1	9.31248	4.72	25	1	R.VAPEEHPVLLTEAPLNPK.A
	2016-11-16-hjk-Sharma-Shalini-SL3-wt.26531.26531.3	6.496	0.6511	100	3183.61	3183.61	-1.3	2584800	1	14.1911	5.52	41.1	2	R.TTGIVMDSGDGVTHTVPIYEGYALPHAILR.L
	2016-11-16-hjk-Sharma-Shalini-SL3-wt.26518.26518.4	6.0045	0.6388	100	3183.61	3183.61	-1	7.31407e+06	1	12.6427	5.52	20.8	4	R.TTGIVMDSGDGVTHTVPIYEGYALPHAILR.L
	2016-11-16-hjk-Sharma-Shalini-SL3-wt.26277.26277.2	3.8171	0.4422	100	1623.84	1623.84	0.8	5352066	1	6.98032	4.72	64	1	R.LDLAGRDLTDYLMK.I
	2016-11-16-hjk-Sharma-Shalini-SL3-wt.26261.26261.3	2.2396	0.3375	99.7	1623.84	1623.84	0.1	985517	1	5.59129	4.72	18.8	1	R.LDLAGRDLTDYLMK.I
	2016-11-16-hjk-Sharma-Shalini-SL3-wt.24472.24472.2	1.4188	0.4838	99.7	998.486	998.486	-0.4	2.20148e+06	1	8.46712	4.46	66.7	1	R.DLTDYLMK.I
	2016-11-16-hjk-Sharma-Shalini-SL3-wt.13037.13037.2	1.889	0.557	100	1132.53	1132.53	-0.9	9969214	1	13.3189	6.56	53.3	1	R.GYSFTTTAER.E
	2016-11-16-hjk-Sharma-Shalini-SL3-wt.22806.22806.2	4.0048	0.6594	100	1790.89	1790.89	-1.3	3497255	1	14.1451	4.14	74.1	4	K.SYELPDGQVITIGNER.F
	2016-11-16-hjk-Sharma-Shalini-SL3-wt.4849.4849.2	2.0435	0.3373	99.8	905.452	905.451	0.9	40219784	1	5.20852	6.56	83.3	1	K.CDVDIRK.D
	2016-11-16-hjk-Sharma-Shalini-SL3-wt.22896.22896.3	4.4397	0.5045	100	2343.16	2343.16	-2.1	749536	1	11.4269	6.56	37.9	1	R.KDLYANTVLSGGTTMYPGIADR.M
	2016-11-16-hjk-Sharma-Shalini-SL3-wt.26662.26662.2	6.1121	0.6832	100	2215.07	2215.07	0.4	3.00076e+06	1	17.9642	4.46	67.6	3	K.DLYANTVLSGGTTMYPGIADR.M
	2016-11-16-hjk-Sharma-Shalini-SL3-wt.15971.15971.2	2.3412	0.5922	100	1161.62	1161.62	-0.5	94747320	1	11.2736	6.56	66.7	2	K.EITALAPSTMK.I
	2016-11-16-hjk-Sharma-Shalini-SL3-wt.10407.10407.2	3.8032	0.7488	100	1516.7	1516.7	-0.8	8009395	1	14.6137	4.72	63.6	1	K.QEYDESGPSIVHR.K
	2016-11-16-hjk-Sharma-Shalini-SL3-wt.10382.10382.3	3.6353	0.6104	100	1516.7	1516.7	0.5	4903053	1	12.901	4.72	43.5	1	K.QEYDESGPSIVHR.K
	2016-11-16-hjk-Sharma-Shalini-SL3-wt.7732.7732.2	4.0758	0.6003	100	1644.8	1644.8	-0.9	1.5413e+06	1	14.9101	5.8	60	2	K.QEYDESGPSIVHRK.C
	2016-11-16-hjk-Sharma-Shalini-SL3-wt.7549.7549.3	4.0901	0.6178	100	1644.8	1644.8	-0.4	2250099	1	11.1858	5.8	42	2	K.QEYDESGPSIVHRK.C
	2016-11-16-hjk-Sharma-Shalini-SL3-wt.7648.7648.4	2.9406	0.4622	100	1644.8	1644.8	0.3	1.56686e+06	1	7.56658	5.8	26	1	K.QEYDESGPSIVHRK.C
P48668	41	52	0.537	564	60025	8	U	0.00460751	2.4435	Keratin, type II cytoskeletal 6C OS=Homo sapiens GN=KRT6C PE=1 SV=3	0	52	0
	2016-11-16-hjk-Sharma-Shalini-SL3-wt.4048.4048.2	2.3164	0.3639	100	965.491	965.491	-0.2	2.30025e+06	1	7.46512	12	68.8	1	R.RGFSANSAR.L
	2016-11-16-hjk-Sharma-Shalini-SL3-wt.14526.14526.2	2.7487	0.5983	100	1026.52	1026.52	-0.7	8.25066e+06	1	15.146	10.06	76.5	1	R.SGFSSISVSR.S
	2016-11-16-hjk-Sharma-Shalini-SL3-wt.9428.9428.3	3.3746	0.6213	100	1667.77	1667.77	-0.4	4837368	1	13.1879	10.28	33.8	1	R.SRGSGGLGGACGGAGFGSR.S
	2016-11-16-hjk-Sharma-Shalini-SL3-wt.11922.11922.2	3.9191	0.7165	100	1424.63	1424.63	-1.7	3.23496e+06	1	14.6685	8.26	72.4	2	R.GSGGLGGACGGAGFGSR.S
	2016-11-16-hjk-Sharma-Shalini-SL3-wt.13780.13780.2	1.7903	0.3897	99.8	881.473	881.473	-0.1	8947005	1	10.23	8.8	60	1	R.SLYGLGGSK.R
	2016-11-16-hjk-Sharma-Shalini-SL3-wt.16623.16623.2	4.1647	0.7234	100	1598.76	1598.76	-1.3	7.85624e+06	1	19.6784	8.26	50	1	R.ISIGGGSCAISGGYGSR.A
	2016-11-16-hjk-Sharma-Shalini-SL3-wt.8757.8757.2	2.9393	0.2732	100	1161.64	1161.64	-0.1	6074891	1	6.4117	9.08	78.6	2	K.VRFLEQQNK.V
	2016-11-16-hjk-Sharma-Shalini-SL3-wt.19209.19209.2	2.9622	0.5909	100	1203.63	1203.64	-1.6	80308432	1	10.0863	6.56	70.6	3	K.WTLLQEQGTK.T
	2016-11-16-hjk-Sharma-Shalini-SL3-wt.10908.10908.2	3.4941	0.4023	100	1172.64	1172.64	-0.4	7522104	1	7.3779	6.56	77.8	1	R.RQLDSIVGER.G
	2016-11-16-hjk-Sharma-Shalini-SL3-wt.13789.13789.2	1.9276	0.388	99.9	1016.54	1016.54	0	79314400	1	7.7923	4.46	50	2	R.QLDSIVGER.G
	2016-11-16-hjk-Sharma-Shalini-SL3-wt.7472.7472.2	2.5302	0.2655	99.9	945.51	945.511	-1	15984057	1	6.04861	6.56	84.6	1	R.GRLDSELR.N
	2016-11-16-hjk-Sharma-Shalini-SL3-wt.24157.24157.2	2.4711	0.393	100	1204.59	1204.59	0.3	1.71597e+06	1	7.07751	4.14	61.1	1	R.NMQDLVEDLK.N
	2016-11-16-hjk-Sharma-Shalini-SL3-wt.6462.6462.2	2.9911	0.5565	100	1152.55	1152.55	0.1	89265408	1	10.1178	4.72	81.2	1	K.NKYEDEINK.R
	2016-11-16-hjk-Sharma-Shalini-SL3-wt.6406.6406.2	2.7562	0.5278	100	1308.65	1308.65	-2.1	218422688	1	8.88493	6.56	75	1	K.NKYEDEINKR.T
	2016-11-16-hjk-Sharma-Shalini-SL3-wt.6396.6396.3	3.826	0.442	100	1308.65	1308.65	-0.8	684676670	1	8.44799	6.56	65.6	2	K.NKYEDEINKR.T
	2016-11-16-hjk-Sharma-Shalini-SL3-wt.6344.6344.2	1.8136	0.3485	99.8	910.415	910.415	0.3	23378344	1	10.7076	4.14	66.7	1	K.YEDEINK.R
	2016-11-16-hjk-Sharma-Shalini-SL3-wt.4918.4918.2	2.0152	0.7003	100	1066.51	1066.52	-1.6	27652036	1	13.662	4.72	71.4	1	K.YEDEINKR.T
	2016-11-16-hjk-Sharma-Shalini-SL3-wt.14533.14533.3	3.052	0.4635	100	1378.73	1378.73	-2	2.75268e+06	1	7.94562	6.56	33.3	1	K.RTAAENEFVTLK.K
	2016-11-16-hjk-Sharma-Shalini-SL3-wt.10776.10776.3	3.5582	0.504	100	1506.82	1506.83	-2.8	14152602	1	8.82306	8.8	57.9	1	K.RTAAENEFVTLKK.D
	2016-11-16-hjk-Sharma-Shalini-SL3-wt.17677.17677.2	2.6549	0.2809	99.9	1222.63	1222.63	0.3	3.19592e+06	1	9.48217	4.46	63.2	2	R.TAAENEFVTLK.K
	2016-11-16-hjk-Sharma-Shalini-SL3-wt.13223.13223.2	3.1001	0.5287	100	1350.72	1350.73	-2.3	6551722	1	10.8852	6.56	70	1	R.TAAENEFVTLKK.D
	2016-11-16-hjk-Sharma-Shalini-SL3-wt.10031.10031.2	2.2999	0.6169	100	1026.46	1026.46	2	4157698	1	12.53	4.46	68.8	2	K.DVDAAYMNK.V
	2016-11-16-hjk-Sharma-Shalini-SL3-wt.27243.27243.2	3.3175	0.4067	100	1407.71	1407.71	-1	7.80913e+06	1	7.7707	4.14	75	1	K.ADTLTDEINFLR.A
	2016-11-16-hjk-Sharma-Shalini-SL3-wt.28081.28081.3	3.7901	0.5819	100	3038.43	3038.42	2.2	208134	1	12.4441	4.4	17.2	1	R.ALYDAELSQMQTHISDTSVVLSMDNNR.N
	2016-11-16-hjk-Sharma-Shalini-SL3-wt.24791.24791.2	3.1022	0.4081	100	1329.72	1329.73	-1.4	3.93014e+06	1	9.92235	4.14	59.1	1	R.NLDLDSIIAEVK.A
	2016-11-16-hjk-Sharma-Shalini-SL3-wt.9450.9450.2	2.3777	0.453	100	1107.54	1107.54	-0.2	5.50364e+06	1	8.62727	4.46	80	2	K.AQYEEIAQR.S
	2016-11-16-hjk-Sharma-Shalini-SL3-wt.10615.10615.2	3.9886	0.5015	100	1455.69	1455.69	0.3	36121908	1	9.71627	6.56	80	1	R.SRAEAESWYQTK.Y
	2016-11-16-hjk-Sharma-Shalini-SL3-wt.10606.10606.3	2.7459	0.6155	100	1455.69	1455.69	0.2	5359364	1	12.7882	6.56	38.9	1	R.SRAEAESWYQTK.Y
	2016-11-16-hjk-Sharma-Shalini-SL3-wt.12771.12771.2	3.114	0.6128	100	1212.55	1212.55	-2.1	2.46733e+06	1	13.4384	4.46	76.5	1	R.AEAESWYQTK.Y
	2016-11-16-hjk-Sharma-Shalini-SL3-wt.13050.13050.2	2.8496	0.4837	100	1165.58	1165.58	-1.6	6.94802e+06	1	12.2043	4.46	72.2	2	K.YEELQVTAGR.H
	2016-11-16-hjk-Sharma-Shalini-SL3-wt.8125.8125.2	3.0863	0.475	100	1315.69	1315.7	-2.1	1.47857e+06	1	9.56296	6.56	68.4	1	R.NTKQEIAEINR.M
	2016-11-16-hjk-Sharma-Shalini-SL3-wt.9156.9156.2	2.1109	0.4592	99.8	972.508	972.511	-3.1	10093918	1	7.28288	4.46	71.4	1	K.QEIAEINR.M
	2016-11-16-hjk-Sharma-Shalini-SL3-wt.4825.4825.2	2.1886	0.3025	99.9	1096.61	1096.61	-0.1	4.26624e+06	1	7.26267	7.33	73.3	1	R.LRSEIDHVK.K
	2016-11-16-hjk-Sharma-Shalini-SL3-wt.3673.3673.3	3.2967	0.2525	99.9	1224.7	1224.71	-1	5772001	1	7.36063	8.8	59.4	1	R.LRSEIDHVKK.Q
	2016-11-16-hjk-Sharma-Shalini-SL3-wt.18076.18076.2	3.0335	0.4471	100	1357.73	1357.73	-0.4	4.14721e+06	1	7.56721	4.72	71.4	1	K.NKLEGLEDALQK.A
	2016-11-16-hjk-Sharma-Shalini-SL3-wt.18602.18602.2	2.7962	0.4917	100	1115.59	1115.59	-1.3	4827160	1	9.04637	4.14	72.2	1	K.LEGLEDALQK.A
	2016-11-16-hjk-Sharma-Shalini-SL3-wt.16151.16151.2	2.2049	0.3243	99.8	1153.55	1153.56	-0.7	43937104	1	8.74787	4.46	56.2	1	K.EYQELMNVK.L
	2016-11-16-hjk-Sharma-Shalini-SL3-wt.24334.24334.2	3.1073	0.5248	100	1263.69	1263.69	-1.2	974869	1	11.7616	4.46	65	1	K.LALDVEIATYR.K
	2016-11-16-hjk-Sharma-Shalini-SL3-wt.6363.6363.2	3.0832	0.5511	100	1133.56	1133.56	-0.4	3.05256e+06	1	9.82855	4.72	81.2	1	R.KLLEGEECR.L
	2016-11-16-hjk-Sharma-Shalini-SL3-wt.7496.7496.2	2.0621	0.3026	99.7	1005.47	1005.47	-1	23355362	1	13.9021	4.14	57.1	1	K.LLEGEECR.L
	2016-11-16-hjk-Sharma-Shalini-SL3-wt.15121.15121.2	3.9806	0.6013	100	1447.77	1447.78	-4	2.04363e+06	1	14.4238	9.08	72.4	2	R.AIGGGLSSVGGGSSTIK.Y
P09429	10	10	0.535	215	24894	5.7	U	0.00232436	2.42768	High mobility group protein B1 OS=Homo sapiens GN=HMGB1 PE=1 SV=3	0	10	0
	2016-11-16-hjk-Sharma-Shalini-SL3-wt.23360.23360.2	4.3688	0.6898	100	1496.66	1496.67	-3.7	2.09117e+06	1	12.6978	8.26	63.6	1	K.MSSYAFFVQTCR.E
*	2016-11-16-hjk-Sharma-Shalini-SL3-wt.16820.16820.2	4.032	0.2599	100	1464.67	1464.68	-1.8	1.36926e+06	1	13.4345	5.63	70.8	1	K.HPDASVNFSEFSK.K
	2016-11-16-hjk-Sharma-Shalini-SL3-wt.4695.4695.2	1.6808	0.2992	99.2	916.488	916.489	-0.9	5.43053e+06	1	5.59753	8.8	76.9	1	K.FKDPNAPK.R
*	2016-11-16-hjk-Sharma-Shalini-SL3-wt.23833.23833.3	4.4897	0.4477	100	2002	2002	0.2	1.76621e+06	1	12.3614	9.16	50	1	K.RPPSAFFLFCSEYRPK.I
	2016-11-16-hjk-Sharma-Shalini-SL3-wt.12037.12037.3	3.446	0.5424	100	1520.84	1520.84	-1.1	11256604	1	9.77494	7.33	37.8	1	K.IKGEHPGLSIGDVAK.K
	2016-11-16-hjk-Sharma-Shalini-SL3-wt.13727.13727.2	2.4066	0.3555	99.7	1279.67	1279.66	2.4	6562681	1	6.61831	5.63	42.9	1	K.GEHPGLSIGDVAK.K
	2016-11-16-hjk-Sharma-Shalini-SL3-wt.13805.13805.3	7.1226	0.5814	100	2238.05	2238.05	-0.9	2.33253e+06	1	14.4792	4.89	64.4	1	K.KLGEMWNNTAADDKQPYEK.K
	2016-11-16-hjk-Sharma-Shalini-SL3-wt.13799.13799.4	4.1148	0.471	100	2238.05	2238.05	-2	2039412	1	10.7691	4.89	29.4	1	K.KLGEMWNNTAADDKQPYEK.K
	2016-11-16-hjk-Sharma-Shalini-SL3-wt.15740.15740.3	4.308	0.5437	100	2109.95	2109.95	-1.7	2.15327e+06	1	12.6298	4.4	39.3	1	K.LGEMWNNTAADDKQPYEK.K
*	2016-11-16-hjk-Sharma-Shalini-SL3-wt.10638.10638.3	6.0578	0.7814	100	4007.32	4006.33	-2.2	1.09233e+06	1	17.6443	3.32	33.3	1	K.KKEEEEDEEDEEDEEEEEDEEDEDEEEDDDDE.-
P05386	2	2	0.526	114	11514	4.3	U	0.000876733	2.35738	60S acidic ribosomal protein P1 OS=Homo sapiens GN=RPLP1 PE=1 SV=1	0	2	0
*	2016-11-16-hjk-Sharma-Shalini-SL3-wt.27830.27830.3	3.8523	0.6451	100	3809.94	3808.93	1.7	476635	1	13.2399	4.46	9.8	1	K.ALANVNIGSLICNVGAGGPAPAAGAAPAGGPAPSTAAAPAEEK.K
	2016-11-16-hjk-Sharma-Shalini-SL3-wt.27528.27528.2	3.704	0.7619	100	1949.76	1949.76	-0.7	943600	1	8.3698	3.64	51.7	1	K.KEESEESDDDMGFGLFD.-
P07108	4	4	0.506	87	10044	6.5	U	0.00229764	2.20627	Acyl-CoA-binding protein OS=Homo sapiens GN=DBI PE=1 SV=2	0	4	0
*	2016-11-16-hjk-Sharma-Shalini-SL3-wt.21214.21214.3	3.3571	0.6584	100	1957.93	1957.94	-1.6	4606893	1	14.0089	5.8	28.3	1	K.TKPSDEEMLFIYGHYK.Q
*	2016-11-16-hjk-Sharma-Shalini-SL3-wt.21313.21313.2	3.814	0.5655	100	2150.06	2150.05	0.9	1.59099e+06	1	11.1169	4.72	40.6	1	K.QATVGDINTERPGMLDFTGK.A
*	2016-11-16-hjk-Sharma-Shalini-SL3-wt.21271.21271.3	5.0558	0.6398	100	2150.05	2150.05	-0.2	3.9766e+06	1	11.769	4.72	35.5	1	K.QATVGDINTERPGMLDFTGK.A
*	2016-11-16-hjk-Sharma-Shalini-SL3-wt.22608.22608.2	2.2579	0.3409	100	1061.5	1061.51	-0.2	2.08068e+06	1	7.37645	4.46	71.4	1	K.WDAWNELK.G
P68371	20	31	0.503	445	49831	4.9	U	0.00348132	2.1842	Tubulin beta-2C chain OS=Homo sapiens GN=TUBB2C PE=1 SV=1	0	31	0
	2016-11-16-hjk-Sharma-Shalini-SL3-wt.24779.24779.3	5.1658	0.5633	100	3116.41	3116.42	-2.7	1.49337e+06	1	10.4915	4.28	27.5	1	K.FWEVISDEHGIDPTGTYHGDSDLQLER.I
*	2016-11-16-hjk-Sharma-Shalini-SL3-wt.14117.14117.2	3.2323	0.6577	100	1328.65	1328.65	-0.7	6.99462e+06	1	14.6287	6.56	59.1	1	R.INVYYNEATGGK.Y
	2016-11-16-hjk-Sharma-Shalini-SL3-wt.23872.23872.2	3.5468	0.5689	100	1601.83	1601.82	3.9	5956180	1	11.9343	4.14	69.2	1	R.AVLVDLEPGTMDSVR.S
	2016-11-16-hjk-Sharma-Shalini-SL3-wt.29214.29214.3	7.6114	0.6587	100	2798.34	2798.34	-1.1	7057423	1	14.0253	9.08	44.7	3	R.SGPFGQIFRPDNFVFGQSGAGNNWAK.G
	2016-11-16-hjk-Sharma-Shalini-SL3-wt.28658.28658.3	6.1413	0.5781	100	2087.08	2087.08	1.5	3.11666e+06	1	12.4574	4.89	53.2	1	K.GHYTEGAELVDSVLDVVRK.E
	2016-11-16-hjk-Sharma-Shalini-SL3-wt.28672.28672.4	3.7155	0.5498	100	2087.08	2087.08	1.3	319478	1	9.98427	4.89	21.7	1	K.GHYTEGAELVDSVLDVVRK.E
	2016-11-16-hjk-Sharma-Shalini-SL3-wt.5720.5720.2	2.2041	0.4489	100	1077.53	1077.53	-0.1	4.63008e+06	1	7.67113	4.72	76.9	1	K.IREEYPDR.I
	2016-11-16-hjk-Sharma-Shalini-SL3-wt.21042.21042.2	3.3773	0.5809	100	1319.71	1319.7	1.8	2417879	1	8.50453	9.08	59.1	3	R.IMNTFSVVPSPK.V
	2016-11-16-hjk-Sharma-Shalini-SL3-wt.18166.18166.2	2.6803	0.438	100	1130.6	1130.6	0.6	1.80559e+06	1	8.33924	6.56	83.3	1	R.FPGQLNADLR.K
	2016-11-16-hjk-Sharma-Shalini-SL3-wt.13899.13899.3	2.6112	0.4112	99.9	1258.69	1258.69	-0.8	1.47102e+06	1	6.48957	9.08	38.9	2	R.FPGQLNADLRK.L
	2016-11-16-hjk-Sharma-Shalini-SL3-wt.24167.24167.2	2.9885	0.3517	100	1143.63	1143.63	0.6	2524926	1	9.96724	10.06	76.5	2	K.LAVNMVPFPR.L
	2016-11-16-hjk-Sharma-Shalini-SL3-wt.28510.28510.2	3.1925	0.6845	100	1620.83	1620.84	-1.1	848601	1	13.2664	10.06	52	1	R.LHFFMPGFAPLTSR.G
	2016-11-16-hjk-Sharma-Shalini-SL3-wt.28492.28492.3	3.2716	0.4933	100	1620.83	1620.84	-0.8	1.03056e+06	1	10.0591	10.06	38	2	R.LHFFMPGFAPLTSR.G
	2016-11-16-hjk-Sharma-Shalini-SL3-wt.28591.28591.2	3.4894	0.6532	100	1691.87	1691.87	-0.3	2.8371e+06	1	13.0046	4.46	56	2	R.ALTVPELTQQMFDAK.N
	2016-11-16-hjk-Sharma-Shalini-SL3-wt.8852.8852.2	1.6049	0.7151	100	1065.43	1065.43	-0.7	4312242	1	7.5246	6.56	50	1	K.NMMAACDPR.H
	2016-11-16-hjk-Sharma-Shalini-SL3-wt.24628.24628.2	2.2694	0.6308	100	1039.59	1039.59	-0.1	3.66999e+06	1	14.0994	9.08	62.5	2	R.YLTVAAVFR.G
	2016-11-16-hjk-Sharma-Shalini-SL3-wt.14846.14846.2	3.4084	0.4452	100	1446.68	1446.69	-4.2	23156512	1	9.98449	4.14	80	2	K.EVDEQMLNVQNK.N
	2016-11-16-hjk-Sharma-Shalini-SL3-wt.27074.27074.2	4.101	0.6207	100	1696.84	1696.83	1.9	3.6942e+06	1	16.715	6.56	86.4	2	K.NSSYFVEWIPNNVK.T
	2016-11-16-hjk-Sharma-Shalini-SL3-wt.21475.21475.2	2.7228	0.4641	100	1385.7	1385.7	0.5	4659593	1	6.99092	10.06	55	1	K.RISEQFTAMFR.R
	2016-11-16-hjk-Sharma-Shalini-SL3-wt.24170.24170.2	2.6166	0.4784	100	1229.6	1229.6	-0.6	5.8516e+06	1	10.287	6.56	61.1	1	R.ISEQFTAMFR.R
P23528	8	9	0.494	166	18502	8.1	U	0.00270942	2.11889	Cofilin-1 OS=Homo sapiens GN=CFL1 PE=1 SV=3	0	9	0
*	2016-11-16-hjk-Sharma-Shalini-SL3-wt.21830.21830.2	2.1126	0.4929	100	1181.59	1181.59	-0.5	3.32095e+06	1	8.74491	4.46	73.3	1	K.AVLFCLSEDK.K
*	2016-11-16-hjk-Sharma-Shalini-SL3-wt.17828.17828.2	2.9801	0.5139	100	1309.68	1309.68	-0.7	6192951	1	11.1252	6.56	82.4	1	K.AVLFCLSEDKK.N
*	2016-11-16-hjk-Sharma-Shalini-SL3-wt.17805.17805.3	1.9861	0.345	99.7	1309.68	1309.68	-0.1	1.40353e+06	1	7.85161	6.56	29.4	1	K.AVLFCLSEDKK.N
*	2016-11-16-hjk-Sharma-Shalini-SL3-wt.9045.9045.2	2.9222	0.386	100	1043.61	1043.61	-0.8	2.16674e+06	1	7.77681	6.56	87.5	1	K.KNIILEEGK.E
*	2016-11-16-hjk-Sharma-Shalini-SL3-wt.27576.27576.2	6.4851	0.7315	100	2166.09	2166.1	-0.8	6.75945e+06	1	18.9554	3.96	73.5	2	K.EILVGDVGQTVDDPYATFVK.M
	2016-11-16-hjk-Sharma-Shalini-SL3-wt.17250.17250.2	3.226	0.5684	100	1337.63	1337.63	-0.6	6547968	1	15.5021	4.46	63.2	1	R.YALYDATYETK.E
	2016-11-16-hjk-Sharma-Shalini-SL3-wt.28951.28951.3	2.7141	0.5149	100	2334.24	2334.24	0.4	429778	1	8.53059	4.89	22.4	1	K.ESKKEDLVFIFWAPESAPLK.S
*	2016-11-16-hjk-Sharma-Shalini-SL3-wt.9533.9533.2	6.1997	0.7213	100	1519.68	1519.68	-0.4	3.06389e+06	1	19.3421	4.72	100	1	K.HELQANCYEEVK.D
O75531	5	5	0.494	89	10059	6.1	U	0.00280752	2.11889	Barrier-to-autointegration factor OS=Homo sapiens GN=BANF1 PE=1 SV=1	0	5	0
*	2016-11-16-hjk-Sharma-Shalini-SL3-wt.8738.8738.3	3.5413	0.4204	100	1415.67	1415.67	0.6	1.38168e+06	1	8.45541	5.8	50	1	K.HRDFVAEPMGEK.P
*	2016-11-16-hjk-Sharma-Shalini-SL3-wt.25343.25343.2	4.3837	0.6548	100	1296.75	1296.75	-0.3	1.28127e+06	1	16.4949	6.56	88	1	K.PVGSLAGIGEVLGK.K
*	2016-11-16-hjk-Sharma-Shalini-SL3-wt.23556.23556.3	2.8898	0.2716	99.6	1478.76	1478.76	-1.9	1.62284e+06	1	5.22227	4.89	30.6	1	K.KDEDLFREWLK.D
*	2016-11-16-hjk-Sharma-Shalini-SL3-wt.27569.27569.2	2.6561	0.3507	99.9	1350.67	1350.67	2.6	562500	1	5.85998	4.4	70.6	1	K.DEDLFREWLK.D
*	2016-11-16-hjk-Sharma-Shalini-SL3-wt.14280.14280.2	1.6731	0.4189	99.8	927.381	927.381	-0.2	3.03684e+06	1	4.44292	5.69	66.7	1	R.DCFGCLR.E
P07476	30	36	0.492	585	68479	4.6	U	0.00307531	2.10456	Involucrin OS=Homo sapiens GN=IVL PE=1 SV=2	0	36	0
*	2016-11-16-hjk-Sharma-Shalini-SL3-wt.18228.18228.3	4.1537	0.5519	100	1806.99	1806.98	0.9	1.93261e+06	1	9.70612	4.4	47.9	1	K.VPVELPVEVPSKQEEK.H
*	2016-11-16-hjk-Sharma-Shalini-SL3-wt.7281.7281.2	1.6323	0.3091	99.3	1056.53	1056.53	0	2.74974e+06	1	8.08275	4.46	60	1	K.AENPEQQLK.Q
*	2016-11-16-hjk-Sharma-Shalini-SL3-wt.19385.19385.2	6.5384	0.4763	100	1569.88	1569.88	-1.1	2.27777e+06	1	9.68246	4.72	100	1	K.KLLDQQLDQELVK.R
*	2016-11-16-hjk-Sharma-Shalini-SL3-wt.19373.19373.3	3.4897	0.2297	99.9	1569.88	1569.88	-1.5	1.79424e+06	1	6.19873	4.72	42.1	1	K.KLLDQQLDQELVK.R
*	2016-11-16-hjk-Sharma-Shalini-SL3-wt.21721.21721.2	4.5031	0.2601	100	1441.79	1441.79	-1	3.73246e+06	1	9.46468	4.14	72.7	1	K.LLDQQLDQELVK.R
*	2016-11-16-hjk-Sharma-Shalini-SL3-wt.19310.19310.3	2.6706	0.4288	100	1597.89	1597.89	-0.6	2426887	1	7.5473	4.72	42.5	1	K.LLDQQLDQELVKR.D
*	2016-11-16-hjk-Sharma-Shalini-SL3-wt.5080.5080.2	2.3895	0.4024	100	976.489	976.488	1.2	1.50007e+06	1	7.39342	6.56	92.9	1	K.RDEQLGMK.K
*	2016-11-16-hjk-Sharma-Shalini-SL3-wt.19421.19421.2	4.9539	0.5111	100	1790.92	1790.93	-2.3	2956030	1	10.3391	4.4	69.2	1	K.EQLLELPEQQEGHLK.H
*	2016-11-16-hjk-Sharma-Shalini-SL3-wt.19408.19408.3	4.6581	0.5191	100	1790.93	1790.93	-1.2	3.56166e+06	1	9.16741	4.4	45.7	1	K.EQLLELPEQQEGHLK.H
*	2016-11-16-hjk-Sharma-Shalini-SL3-wt.4891.4891.2	4.1	0.495	100	1209.62	1209.62	-1.3	23514890	1	12.8787	5.63	94.4	1	K.HLEQQEGQLK.H
*	2016-11-16-hjk-Sharma-Shalini-SL3-wt.16429.16429.3	5.2525	0.5613	100	2359.13	2359.13	-1.1	6.43557e+06	1	11.3136	4.58	55	1	K.HLEHQEGQLEVPEEQMGQLK.Y
*	2016-11-16-hjk-Sharma-Shalini-SL3-wt.10360.10360.2	2.8576	0.5172	100	1235.63	1235.63	-0.1	3.24909e+06	1	9.76841	4.46	77.8	1	K.YLEQQEGQLK.H
*	2016-11-16-hjk-Sharma-Shalini-SL3-wt.17052.17052.2	3.5284	0.6212	100	1525.77	1525.77	-0.1	2630290	1	10.7976	4.46	68.2	2	K.QPELPEQQMGQLK.H
*	2016-11-16-hjk-Sharma-Shalini-SL3-wt.2716.2716.2	3.6507	0.6299	100	1193.59	1193.59	-1	767005	1	15.0454	5.63	83.3	2	K.HLEQQEGQPK.H
*	2016-11-16-hjk-Sharma-Shalini-SL3-wt.19943.19943.2	9.0941	0.7552	100	2393.16	2393.16	1.2	3.57207e+06	1	20.3387	4.12	77.8	1	K.HLEQQEGQLEQLEEQEGQLK.H
*	2016-11-16-hjk-Sharma-Shalini-SL3-wt.19929.19929.3	8.339	0.7051	100	2393.16	2393.16	-1.2	10355315	1	14.6054	4.12	50.8	1	K.HLEQQEGQLEQLEEQEGQLK.H
*	2016-11-16-hjk-Sharma-Shalini-SL3-wt.6480.6480.2	4.3144	0.6622	100	1211.59	1211.59	-2.8	12978609	1	14.6741	4.4	100	1	K.HLEEEEGQLK.H
*	2016-11-16-hjk-Sharma-Shalini-SL3-wt.6032.6032.2	3.5198	0.4565	100	1179.65	1179.65	-0.1	7599640	1	12.8088	7.33	100	1	K.HLVQQEGQLK.H
*	2016-11-16-hjk-Sharma-Shalini-SL3-wt.8333.8333.2	5.7401	0.7176	100	1721.85	1721.86	-3.6	2.8674e+06	1	21.5397	4.72	84.6	1	K.HLVQQEGQLEQQER.Q
*	2016-11-16-hjk-Sharma-Shalini-SL3-wt.8322.8322.3	4.0526	0.6053	100	1721.85	1721.86	-1.1	1.4221e+06	1	11.7787	4.72	54.8	1	K.HLVQQEGQLEQQER.Q
*	2016-11-16-hjk-Sharma-Shalini-SL3-wt.12778.12778.2	5.4486	0.5925	100	1535.81	1535.82	-2.1	3914322	1	12.5413	5.63	95.5	1	R.QVEHLEQQVGQLK.H
*	2016-11-16-hjk-Sharma-Shalini-SL3-wt.12770.12770.3	3.3143	0.4165	100	1535.82	1535.82	1.3	3.64505e+06	1	7.08194	5.63	38.5	1	R.QVEHLEQQVGQLK.H
*	2016-11-16-hjk-Sharma-Shalini-SL3-wt.5657.5657.2	4.3194	0.6364	100	1210.61	1210.61	-0.4	3.45337e+06	1	14.3985	4.72	100	1	K.HLEEQEGQLK.H
*	2016-11-16-hjk-Sharma-Shalini-SL3-wt.12898.12898.2	7.561	0.6905	100	2300.16	2300.16	-2.2	3523497	1	17.7055	4.72	69.4	1	K.HLEQQQGQLEVPEQQVGQPK.N
*	2016-11-16-hjk-Sharma-Shalini-SL3-wt.12862.12862.3	5.6674	0.6109	100	2300.15	2300.16	-4.1	4867108	1	11.3052	4.72	55.9	1	K.HLEQQQGQLEVPEQQVGQPK.N
*	2016-11-16-hjk-Sharma-Shalini-SL3-wt.14989.14989.2	3.742	0.4099	100	1525.78	1525.79	-2.1	4027019	1	9.84549	4.14	62.5	2	K.QLELPEQQEGQVK.H
*	2016-11-16-hjk-Sharma-Shalini-SL3-wt.17315.17315.2	5.8019	0.5611	100	1821.93	1821.93	-0.5	3.43985e+06	1	12.6172	4.14	74.1	2	K.QEAQLELPEQQVGQPK.H
*	2016-11-16-hjk-Sharma-Shalini-SL3-wt.4780.4780.2	5.0958	0.5437	100	1558.76	1558.76	-1.5	2.41124e+06	1	12.8657	5.52	91.7	1	K.HLEHPEQQDGQLK.H
*	2016-11-16-hjk-Sharma-Shalini-SL3-wt.4762.4762.3	4.6912	0.4693	100	1558.76	1558.76	-1.3	4343546	1	10.3388	5.52	66.7	3	K.HLEHPEQQDGQLK.H
*	2016-11-16-hjk-Sharma-Shalini-SL3-wt.24499.24499.2	5.5498	0.6635	100	2629.39	2629.4	-4	1.56527e+06	1	14.5845	4.46	50	1	K.GQLEQPVFAPAPGQVQDIQPALPTK.G
P67809	14	15	0.491	324	35924	9.9	U	0.0023136	2.09742	Nuclease-sensitive element-binding protein 1 OS=Homo sapiens GN=YBX1 PE=1 SV=3	0	15	0
	2016-11-16-hjk-Sharma-Shalini-SL3-wt.14630.14630.2	2.308	0.4984	100	940.463	940.464	-0.5	3.77351e+06	1	11.1386	9.08	78.6	1	R.NGYGFINR.N
	2016-11-16-hjk-Sharma-Shalini-SL3-wt.12841.12841.2	3.3686	0.6671	100	1286.67	1286.67	-1.4	3972528	1	12.8243	5.63	80	1	K.EDVFVHQTAIK.K
	2016-11-16-hjk-Sharma-Shalini-SL3-wt.9247.9247.2	3.9671	0.4312	100	1414.77	1414.77	-1.3	2.05898e+06	1	10.352	7.33	90	1	K.EDVFVHQTAIKK.N
	2016-11-16-hjk-Sharma-Shalini-SL3-wt.21471.21471.2	5.5547	0.7272	100	1795.83	1795.82	1.3	1.61792e+06	1	18.1341	3.8	65.5	2	R.SVGDGETVEFDVVEGEK.G
*	2016-11-16-hjk-Sharma-Shalini-SL3-wt.11307.11307.2	5.0301	0.6592	100	1695.86	1695.87	-1.5	1.76866e+06	1	14.2651	6.56	60	1	K.GAEAANVTGPGGVPVQGSK.Y
*	2016-11-16-hjk-Sharma-Shalini-SL3-wt.6153.6153.2	4.4406	0.7157	100	1688.71	1688.71	-2	3093699	1	13.0796	4.46	70.8	1	R.NYQQNYQNSESGEK.N
*	2016-11-16-hjk-Sharma-Shalini-SL3-wt.4184.4184.2	3.7861	0.638	100	1587.7	1587.7	-1.8	584817	1	15.1957	4.14	61.5	1	K.NEGSESAPEGQAQQR.R
*	2016-11-16-hjk-Sharma-Shalini-SL3-wt.12832.12832.4	5.9718	0.624	100	3223.53	3223.53	-1.4	7.9249e+06	1	13.4283	4.89	28.8	1	R.RPQYSNPPVQGEVMEGADNQGAGEQGRPVR.Q
*	2016-11-16-hjk-Sharma-Shalini-SL3-wt.4635.4635.3	3.5598	0.6923	100	2628.1	2628.1	-1.2	655476	1	11.7292	3.95	30.8	1	R.EDGNEEDKENQGDETQGQQPPQR.R
*	2016-11-16-hjk-Sharma-Shalini-SL3-wt.4023.4023.3	2.8978	0.76	100	2784.2	2784.2	-1.9	1.36517e+06	1	13.4804	4.19	15.7	1	R.EDGNEEDKENQGDETQGQQPPQRR.Y
*	2016-11-16-hjk-Sharma-Shalini-SL3-wt.4022.4022.4	2.718	0.4768	99.9	2784.2	2784.2	-0.9	628548	1	6.8542	4.19	14.1	1	R.EDGNEEDKENQGDETQGQQPPQRR.Y
*	2016-11-16-hjk-Sharma-Shalini-SL3-wt.4142.4142.2	2.2472	0.651	100	1711.76	1711.76	0.9	222140	1	11.9272	4.14	30.8	1	K.ENQGDETQGQQPPQR.R
*	2016-11-16-hjk-Sharma-Shalini-SL3-wt.3355.3355.3	2.6507	0.4499	100	1867.86	1867.86	0.3	324528	1	10.3144	4.72	30.8	1	K.ENQGDETQGQQPPQRR.Y
*	2016-11-16-hjk-Sharma-Shalini-SL3-wt.8577.8577.2	1.9448	0.587	99.8	1897.81	1897.8	3	272191	1	12.0862	3.31	52.2	1	K.AADPPAENSSAPEAEQGGAE.-
P62937	6	7	0.491	165	18012	7.8	U	0.0021201	2.09742	Peptidyl-prolyl cis-trans isomerase A OS=Homo sapiens GN=PPIA PE=1 SV=2	0	7	0
*	2016-11-16-hjk-Sharma-Shalini-SL3-wt.24778.24778.2	2.4175	0.411	100	1055.54	1055.54	0	1.88394e+06	1	10.448	4.46	73.3	2	R.VSFELFADK.V
	2016-11-16-hjk-Sharma-Shalini-SL3-wt.23858.23858.2	2.866	0.5926	100	1598.75	1598.75	0.5	3.51667e+06	1	13.3938	6.56	52	1	R.IIPGFMCQGGDFTR.H
*	2016-11-16-hjk-Sharma-Shalini-SL3-wt.21838.21838.2	2.4574	0.3371	100	1154.57	1154.57	-0.1	24537712	1	6.22511	4.14	68.8	1	K.FEDENFILK.H
*	2016-11-16-hjk-Sharma-Shalini-SL3-wt.25054.25054.3	7.6095	0.5964	100	2791.33	2791.33	-1.1	1.53888e+06	1	14.7644	8.23	35.4	1	K.HTGPGILSMANAGPNTNGSQFFICTAK.T
*	2016-11-16-hjk-Sharma-Shalini-SL3-wt.23141.23141.2	2.979	0.3661	100	1278.58	1278.58	-0.3	3.78311e+06	1	7.70464	4.14	63.2	1	K.EGMNIVEAMER.F
*	2016-11-16-hjk-Sharma-Shalini-SL3-wt.15925.15925.2	3.2692	0.5108	100	1247.63	1247.63	0.6	1914690	1	7.25129	4.46	60	1	K.KITIADCGQLE.-
P04406	19	32	0.49	335	36053	8.5	U	0.00477361	2.0903	Glyceraldehyde-3-phosphate dehydrogenase OS=Homo sapiens GN=GAPDH PE=1 SV=3	0	32	0
*	2016-11-16-hjk-Sharma-Shalini-SL3-wt.11127.11127.2	1.8493	0.4398	99.9	805.431	805.432	-0.9	18489466	1	7.38636	10.06	69.2	1	K.VGVNGFGR.I
*	2016-11-16-hjk-Sharma-Shalini-SL3-wt.28031.28031.2	3.7182	0.4625	100	1613.9	1613.9	-1.1	4.38758e+06	1	12.4138	6.56	73.9	2	K.LVINGNPITIFQER.D
*	2016-11-16-hjk-Sharma-Shalini-SL3-wt.25512.25512.2	3.6763	0.6226	100	2041.11	2041.11	1.9	1.03746e+06	1	10.1329	6.56	51.7	2	K.LVINGNPITIFQERDPSK.I
*	2016-11-16-hjk-Sharma-Shalini-SL3-wt.25584.25584.3	4.3872	0.5826	100	2041.11	2041.11	-0.6	42505720	1	13.0981	6.56	31.2	2	K.LVINGNPITIFQERDPSK.I
*	2016-11-16-hjk-Sharma-Shalini-SL3-wt.28847.28847.3	3.538	0.539	100	2518.22	2518.22	-0.4	400711	1	10.1277	4.4	21.3	1	K.IKWGDAGAEYVVESTGVFTTMEK.A
*	2016-11-16-hjk-Sharma-Shalini-SL3-wt.2204.2204.2	3.0753	0.4877	100	909.489	909.49	-1.7	8000287	1	9.16304	9.08	93.8	1	K.AGAHLQGGAK.R
*	2016-11-16-hjk-Sharma-Shalini-SL3-wt.22460.22460.3	6.0282	0.6272	100	2369.21	2369.21	-1.1	35099272	1	15.2375	7.33	53	3	K.RVIISAPSADAPMFVMGVNHEK.Y
*	2016-11-16-hjk-Sharma-Shalini-SL3-wt.22486.22486.4	3.6992	0.6439	100	2369.21	2369.21	-1.3	5.3378e+06	1	11.7262	7.33	20.8	2	K.RVIISAPSADAPMFVMGVNHEK.Y
*	2016-11-16-hjk-Sharma-Shalini-SL3-wt.24711.24711.2	3.3575	0.6687	100	2213.11	2213.11	1.3	636416	1	16.6572	5.63	33.3	1	R.VIISAPSADAPMFVMGVNHEK.Y
*	2016-11-16-hjk-Sharma-Shalini-SL3-wt.24677.24677.3	5.3483	0.6997	100	2213.11	2213.11	-0.2	9416614	1	18.0236	5.63	36.2	1	R.VIISAPSADAPMFVMGVNHEK.Y
*	2016-11-16-hjk-Sharma-Shalini-SL3-wt.17751.17751.2	5.2525	0.6906	100	1833.92	1833.92	-0.9	56565500	1	15.6796	8.04	65.5	1	K.IISNASCTTNCLAPLAK.V
*	2016-11-16-hjk-Sharma-Shalini-SL3-wt.19692.19692.2	3.2203	0.4071	100	1411.79	1411.79	-1.5	32875322	1	9.51931	9.08	78.3	3	R.GALQNIIPASTGAAK.A
*	2016-11-16-hjk-Sharma-Shalini-SL3-wt.20592.20592.2	4.8548	0.6652	100	1530.79	1530.79	-0.8	2662313	1	17.6179	6.56	84	3	R.VPTANVSVVDLTCR.L
*	2016-11-16-hjk-Sharma-Shalini-SL3-wt.22885.22885.2	5.4786	0.7192	100	1901.01	1901.02	-1	2.051e+06	1	17.3651	6.56	79.3	1	R.VPTANVSVVDLTCRLEK.P
*	2016-11-16-hjk-Sharma-Shalini-SL3-wt.22852.22852.3	4.36	0.5759	100	1901.02	1901.02	0.4	2.04833e+06	1	11.1889	6.56	36.7	1	R.VPTANVSVVDLTCRLEK.P
*	2016-11-16-hjk-Sharma-Shalini-SL3-wt.5037.5037.2	2.0116	0.3155	99.7	829.442	829.441	1.3	7904048	1	6.46817	6.56	64.3	1	K.QASEGPLK.G
*	2016-11-16-hjk-Sharma-Shalini-SL3-wt.25504.25504.2	3.9465	0.6716	100	1763.8	1763.8	-3	3792999	1	16.9131	4.46	66.7	3	K.LISWYDNEFGYSNR.V
*	2016-11-16-hjk-Sharma-Shalini-SL3-wt.15827.15827.2	2.8916	0.5633	100	1201.6	1201.61	-1.7	3.63185e+06	1	16.2423	7.33	73.7	1	R.VVDLMAHMASK.E
*	2016-11-16-hjk-Sharma-Shalini-SL3-wt.16614.16614.2	3.903	0.6908	100	1330.65	1330.65	-3	3.15185e+06	1	15.2706	5.63	85.7	2	R.VVDLMAHMASKE.-
P52907	9	9	0.49	286	32923	5.7	U	0.0015726	2.0903	F-actin-capping protein subunit alpha-1 OS=Homo sapiens GN=CAPZA1 PE=1 SV=3	0	9	0
*	2016-11-16-hjk-Sharma-Shalini-SL3-wt.23949.23949.3	3.0259	0.1942	99.7	2089.01	2089.01	0.5	3.29828e+06	1	7.0988	4.72	33.3	1	K.FITHAPPGEFNEVFNDVR.L
	2016-11-16-hjk-Sharma-Shalini-SL3-wt.22544.22544.2	2.6684	0.419	100	1197.7	1197.69	0.8	1.81252e+06	1	10.1472	6.56	61.1	1	R.LLLNNDNLLR.E
*	2016-11-16-hjk-Sharma-Shalini-SL3-wt.21788.21788.3	4.2142	0.6438	100	2124.98	2124.98	-1.8	5270336	1	13.4928	5.63	40.7	1	R.EGAAHAFAQYNMDQFTPVK.I
*	2016-11-16-hjk-Sharma-Shalini-SL3-wt.19788.19788.3	5.7916	0.609	100	2245.08	2245.07	3.5	3.32808e+06	1	13.8373	4.25	34.2	1	K.IEGYEDQVLITEHGDLGNSR.F
*	2016-11-16-hjk-Sharma-Shalini-SL3-wt.9250.9250.2	3.1389	0.5839	100	1542.69	1542.69	-2.6	1816190	1	12.3738	3.86	65.4	1	K.EASDPQPEEADGGLK.S
*	2016-11-16-hjk-Sharma-Shalini-SL3-wt.25461.25461.3	5.807	0.6331	100	2314.15	2314.15	-0.4	1053693	1	13.0507	5.63	38.7	1	K.TIDGQQTIIACIESHQFQPK.N
*	2016-11-16-hjk-Sharma-Shalini-SL3-wt.26525.26525.2	2.286	0.5489	99.8	1570.91	1570.92	-3.8	1.44146e+06	1	11.4245	9.08	46.2	1	K.FTITPPTAQVVGVLK.I
*	2016-11-16-hjk-Sharma-Shalini-SL3-wt.13769.13769.2	4.597	0.6016	100	1705.82	1705.82	-0.1	2.97141e+06	1	13.4123	4.14	80	1	K.DVQDSLTVSNEAQTAK.E
	2016-11-16-hjk-Sharma-Shalini-SL3-wt.4879.4879.2	2.2827	0.308	100	869.532	869.532	0.3	2.37375e+06	1	6.49527	12	75	1	R.RQLPVTR.T
P62269	10	11	0.487	152	17719	11	U	0.00361652	2.06902	40S ribosomal protein S18 OS=Homo sapiens GN=RPS18 PE=1 SV=3	0	11	0
*	2016-11-16-hjk-Sharma-Shalini-SL3-wt.10137.10137.2	2.3004	0.5428	100	1001.54	1001.54	-0.5	1.91904e+06	1	9.8801	6.56	66.7	1	R.VLNTNIDGR.R
*	2016-11-16-hjk-Sharma-Shalini-SL3-wt.23333.23333.2	1.761	0.2961	99.2	947.591	947.592	-1.2	3118749	1	7.65756	9.08	66.7	1	K.IAFAITAIK.G
*	2016-11-16-hjk-Sharma-Shalini-SL3-wt.8133.8133.2	1.718	0.554	99.9	857.498	857.499	-1.7	8.11527e+06	1	10.662	9.08	66.7	1	R.YAHVVLR.K
*	2016-11-16-hjk-Sharma-Shalini-SL3-wt.5550.5550.2	1.476	0.4834	99.4	985.592	985.594	-2.1	3.52438e+06	1	7.26175	9.98	71.4	1	R.YAHVVLRK.A
*	2016-11-16-hjk-Sharma-Shalini-SL3-wt.8119.8119.2	4.3935	0.4601	100	1403.68	1403.68	1.2	3515470	1	8.77838	4.25	77.3	1	K.RAGELTEDEVER.V
*	2016-11-16-hjk-Sharma-Shalini-SL3-wt.8135.8135.3	2.6379	0.5409	100	1403.67	1403.68	-0.8	2.53951e+06	1	9.43846	4.25	37.8	1	K.RAGELTEDEVER.V
*	2016-11-16-hjk-Sharma-Shalini-SL3-wt.15079.15079.2	2.3636	0.4894	100	1071.6	1071.6	-1.1	3.50733e+06	1	8.36785	10.06	66.7	1	R.VITIMQNPR.Q
*	2016-11-16-hjk-Sharma-Shalini-SL3-wt.25587.25587.2	1.966	0.3959	99.9	1060.56	1060.56	-0.6	1.70431e+06	1	8.86631	6.56	69.2	2	K.IPDWFLNR.Q
*	2016-11-16-hjk-Sharma-Shalini-SL3-wt.14576.14576.2	3.1948	0.4988	100	1321.67	1321.67	-1.9	4262687	1	13.9849	6.56	66.7	1	K.YSQVLANGLDNK.L
*	2016-11-16-hjk-Sharma-Shalini-SL3-wt.6137.6137.2	2.0828	0.1384	99.3	930.501	930.5	0.7	9196264	1	4.35801	4.72	72.7	1	K.LREDLER.L
P35527	21	22	0.483	623	62064	5.2	U	0.00176472	2.04088	Keratin, type I cytoskeletal 9 OS=Homo sapiens GN=KRT9 PE=1 SV=3	0	22	0
*	2016-11-16-hjk-Sharma-Shalini-SL3-wt.14212.14212.2	1.8396	0.2502	99.2	1074.52	1074.52	-0.8	4632585	1	6.46571	9.08	62.5	1	R.QFSSSYLSR.S
*	2016-11-16-hjk-Sharma-Shalini-SL3-wt.7443.7443.2	4.054	0.5975	100	1232.6	1232.6	0.1	5561974	1	12.5173	10.06	75	1	R.SGGGGGGGLGSGGSIR.S
*	2016-11-16-hjk-Sharma-Shalini-SL3-wt.6175.6175.2	2.9964	0.6168	100	1235.53	1235.53	-0.6	5.11615e+06	1	11.3606	9.08	54.2	1	R.FSSSSGYGGGSSR.V
*	2016-11-16-hjk-Sharma-Shalini-SL3-wt.7994.7994.2	2.1729	0.4218	100	1065.5	1065.5	-0.9	4618647	1	8.64195	6.56	66.7	1	K.STMQELNSR.L
	2016-11-16-hjk-Sharma-Shalini-SL3-wt.10609.10609.2	2.1096	0.4285	100	809.44	809.44	-0.2	24963616	1	8.72025	6.56	75	2	R.LASYLDK.V
*	2016-11-16-hjk-Sharma-Shalini-SL3-wt.14627.14627.2	5.0099	0.6127	100	1586.76	1586.77	-1.2	7.02239e+06	1	16.2457	3.96	75	1	K.VQALEEANNDLENK.I
*	2016-11-16-hjk-Sharma-Shalini-SL3-wt.2549.2549.2	2.1278	0.3275	99.9	812.499	812.499	-0.4	1.04863e+06	1	6.58972	10.04	92.9	1	K.KGPAAIQK.N
*	2016-11-16-hjk-Sharma-Shalini-SL3-wt.21614.21614.2	3.1779	0.639	100	1605.74	1605.74	0.2	11991312	1	13.9227	4.46	59.1	1	K.NYSPYYNTIDDLK.D
*	2016-11-16-hjk-Sharma-Shalini-SL3-wt.18208.18208.2	3.3615	0.4843	100	1315.69	1315.69	0.4	4.5605e+06	1	8.83717	4.46	68.2	1	K.DQIVDLTVGNNK.T
*	2016-11-16-hjk-Sharma-Shalini-SL3-wt.17935.17935.2	1.9168	0.4674	100	1060.56	1060.56	-0.3	14408473	1	10.5829	4.46	62.5	1	K.TLLDIDNTR.M
*	2016-11-16-hjk-Sharma-Shalini-SL3-wt.19238.19238.2	1.5465	0.4876	99.8	897.413	897.413	-0.9	6328634	1	8.8869	4.46	58.3	1	R.MTLDDFR.I
*	2016-11-16-hjk-Sharma-Shalini-SL3-wt.15353.15353.2	3.2905	0.5634	100	1157.59	1157.59	-0.8	2.69381e+06	1	10.4023	4.46	75	1	R.QGVDADINGLR.Q
*	2016-11-16-hjk-Sharma-Shalini-SL3-wt.17403.17403.2	2.704	0.6235	100	1190.61	1190.61	-1.9	3.46221e+06	1	10.4641	4.46	61.1	1	R.QVLDNLTMEK.S
*	2016-11-16-hjk-Sharma-Shalini-SL3-wt.24217.24217.2	4.1248	0.4519	100	1851.92	1851.93	-1.2	2.70892e+06	1	7.56255	4.72	55.6	1	K.TLNDMRQEYEQLIAK.N
*	2016-11-16-hjk-Sharma-Shalini-SL3-wt.28821.28821.3	6.9763	0.7012	100	3264.51	3264.51	-0.3	2.04059e+06	1	16.7504	4.12	33.7	1	K.DIENQYETQITQIEHEVSSSGQEVQSSAK.E
*	2016-11-16-hjk-Sharma-Shalini-SL3-wt.25510.25510.3	3.2182	0.5908	100	1837.97	1837.97	0.7	1.95672e+06	1	10.364	4.72	46.8	1	R.HGVQELEIELQSQLSK.K
*	2016-11-16-hjk-Sharma-Shalini-SL3-wt.27037.27037.2	5.5952	0.545	100	2095.04	2095.04	1.5	469089	1	14.9037	4.14	51.9	1	R.QEIECQNQEYSLLLSIK.M
*	2016-11-16-hjk-Sharma-Shalini-SL3-wt.21856.21856.2	7.2546	0.697	100	2510.14	2510.13	1.3	2.44606e+06	1	20.6375	4.12	59.1	1	K.EIETYHNLLEGGQEDFESSGAGK.I
*	2016-11-16-hjk-Sharma-Shalini-SL3-wt.21832.21832.3	7.0119	0.5896	100	2510.13	2510.13	-1.2	5194182	1	16.9311	4.12	43.5	1	K.EIETYHNLLEGGQEDFESSGAGK.I
*	2016-11-16-hjk-Sharma-Shalini-SL3-wt.5522.5522.2	6.6859	0.3365	100	1791.73	1791.73	-1.1	2.29211e+06	1	7.74734	8.8	79.5	1	R.GGSGGSYGGGGSGGGYGGGSGSR.G
*	2016-11-16-hjk-Sharma-Shalini-SL3-wt.9629.9629.3	8.016	0.9042	100	3223.28	3223.28	-0.4	1.91189e+06	1	20.1113	4.72	38.9	1	R.GGSGGSHGGGSGFGGESGGSYGGGEEASGSGGGYGGGSGK.S
P08670	24	25	0.483	466	53652	5.1	U	0.002681	2.04088	Vimentin OS=Homo sapiens GN=VIM PE=1 SV=4	0	25	0
*	2016-11-16-hjk-Sharma-Shalini-SL3-wt.14849.14849.2	1.6382	0.358	99.2	1495.79	1495.79	-0.8	4.21685e+06	1	5.6655	10.88	40	1	R.TYSLGSALRPSTSR.S
*	2016-11-16-hjk-Sharma-Shalini-SL3-wt.14909.14909.2	3.2666	0.5198	100	1428.71	1428.71	1	10565887	1	11.2049	8.8	65.2	1	R.SLYASSPGGVYATR.S
	2016-11-16-hjk-Sharma-Shalini-SL3-wt.14081.14081.2	2.704	0.4694	100	1115.57	1115.57	-0.9	4.13931e+06	1	9.54447	4.14	73.3	1	K.VELQELNDR.F
*	2016-11-16-hjk-Sharma-Shalini-SL3-wt.12302.12302.2	1.7309	0.3695	99.8	870.436	870.436	0.3	3.74999e+06	1	6.92195	6.56	66.7	1	R.FANYIDK.V
	2016-11-16-hjk-Sharma-Shalini-SL3-wt.8757.8757.2	2.9393	0.2732	100	1161.64	1161.64	-0.1	6074891	1	6.4117	9.08	78.6	2	K.VRFLEQQNK.I
*	2016-11-16-hjk-Sharma-Shalini-SL3-wt.26944.26944.2	2.8723	0.3451	99.8	1169.71	1169.71	-3.8	2.62609e+06	1	8.50173	4.46	72.2	1	K.ILLAELEQLK.G
*	2016-11-16-hjk-Sharma-Shalini-SL3-wt.18809.18809.2	4.1195	0.6211	100	1497.7	1497.7	-2.4	3063381	1	12.2018	4.4	95	1	K.SRLGDLYEEEMR.E
*	2016-11-16-hjk-Sharma-Shalini-SL3-wt.18797.18797.3	2.5956	0.5201	100	1497.7	1497.7	-0.2	2.50533e+06	1	9.16043	4.4	26.8	1	K.SRLGDLYEEEMR.E
*	2016-11-16-hjk-Sharma-Shalini-SL3-wt.17845.17845.2	3.1961	0.6188	100	1254.56	1254.57	-1.9	3680125	1	14.5448	3.96	66.7	1	R.LGDLYEEEMR.E
*	2016-11-16-hjk-Sharma-Shalini-SL3-wt.5185.5185.2	3.5542	0.4582	100	1216.63	1216.63	0.5	2562124	1	6.66744	6.56	83.3	1	R.RQVDQLTNDK.A
*	2016-11-16-hjk-Sharma-Shalini-SL3-wt.22358.22358.2	2.098	0.4216	99.9	1076.5	1076.5	-0.9	1.67697e+06	1	7.49593	4.14	62.5	1	R.DNLAEDIMR.L
*	2016-11-16-hjk-Sharma-Shalini-SL3-wt.21827.21827.3	4.9129	0.6072	100	2351.12	2351.13	-4.7	4832487	1	11.7494	4.25	34.5	1	K.LQEEMLQREEAENTLQSFR.Q
*	2016-11-16-hjk-Sharma-Shalini-SL3-wt.15754.15754.2	2.8712	0.5661	100	1323.62	1323.62	-1.2	9450586	1	9.22515	4.14	61.1	1	R.EEAENTLQSFR.Q
*	2016-11-16-hjk-Sharma-Shalini-SL3-wt.23800.23800.3	3.6506	0.4994	100	2393.13	2393.13	-1.5	1.27792e+06	1	8.19836	4.25	29	1	R.EEAENTLQSFRQDVDNASLAR.L
*	2016-11-16-hjk-Sharma-Shalini-SL3-wt.27209.27209.2	3.9192	0.5834	100	1405.76	1405.76	-0.4	1.43374e+06	1	10.3935	4.14	57.1	1	K.VESLQEEIAFLK.K
*	2016-11-16-hjk-Sharma-Shalini-SL3-wt.5838.5838.2	2.3191	0.5843	100	1023.51	1023.51	-0.2	2224279	1	8.84829	6.56	56.2	1	R.QQYESVAAK.N
	2016-11-16-hjk-Sharma-Shalini-SL3-wt.19102.19102.2	2.7078	0.6218	100	1309.61	1309.61	-0.5	16731109	1	13.3804	4.14	61.1	1	K.NLQEAEEWYK.S
*	2016-11-16-hjk-Sharma-Shalini-SL3-wt.12806.12806.2	2.0746	0.351	99.6	1093.53	1093.53	2.5	3832586	1	8.11883	4.46	61.1	1	K.FADLSEAANR.N
*	2016-11-16-hjk-Sharma-Shalini-SL3-wt.20786.20786.2	3.579	0.5217	100	1491.75	1490.75	-2.6	3.38406e+06	1	9.90685	4.46	63.6	1	R.QVQSLTCEVDALK.G
	2016-11-16-hjk-Sharma-Shalini-SL3-wt.19308.19308.2	2.0277	0.5601	100	1121.58	1121.58	-1.7	5.1105e+06	1	9.63994	4.46	57.1	1	R.EYQDLLNVK.M
	2016-11-16-hjk-Sharma-Shalini-SL3-wt.6773.6773.2	1.8795	0.3555	99.7	932.467	932.468	-1.2	2.88848e+06	1	7.74727	4.14	57.1	1	K.LLEGEESR.I
*	2016-11-16-hjk-Sharma-Shalini-SL3-wt.19606.19606.2	3.4468	0.5808	100	1668.84	1668.84	0.1	2890432	1	11.1404	4.72	70.8	1	R.ETNLDSLPLVDTHSK.R
*	2016-11-16-hjk-Sharma-Shalini-SL3-wt.10480.10480.2	4.1487	0.5335	100	1836.8	1836.8	-2.3	2.67509e+06	1	13.1783	4.25	69.2	1	R.DGQVINETSQHHDDLE.-
*	2016-11-16-hjk-Sharma-Shalini-SL3-wt.10478.10478.3	2.7185	0.4783	100	1836.8	1836.8	-0.5	1.52077e+06	1	8.0528	4.25	21.1	1	R.DGQVINETSQHHDDLE.-
P36952	18	23	0.483	375	42100	6	U	0.00306506	2.04088	Serpin B5 OS=Homo sapiens GN=SERPINB5 PE=1 SV=2	0	23	0
*	2016-11-16-hjk-Sharma-Shalini-SL3-wt.24460.24460.2	6.5319	0.6548	100	1870.93	1870.93	-1	2857808	1	12.7299	4.72	73.3	1	K.GDTANEIGQVLHFENVK.D
*	2016-11-16-hjk-Sharma-Shalini-SL3-wt.24458.24458.3	4.8926	0.5343	100	1870.93	1870.93	0.1	1.74486e+06	1	10.1438	4.72	46	1	K.GDTANEIGQVLHFENVK.D
*	2016-11-16-hjk-Sharma-Shalini-SL3-wt.24702.24702.2	3.7595	0.5956	100	1653.81	1653.81	-1.1	3.0848e+06	1	12.4004	4.46	76.9	2	K.DVPFGFQTVTSDVNK.L
*	2016-11-16-hjk-Sharma-Shalini-SL3-wt.16152.16152.2	2.1114	0.2561	99.7	980.493	980.493	-0.8	4742225	1	8.40739	4.14	50	1	K.ELETVDFK.D
*	2016-11-16-hjk-Sharma-Shalini-SL3-wt.5359.5359.2	1.7966	0.2795	99.3	873.48	873.479	1	2.22577e+06	1	6.4531	9.08	66.7	1	K.GQINNSIK.D
*	2016-11-16-hjk-Sharma-Shalini-SL3-wt.23885.23885.2	8.0433	0.6352	100	2346.09	2346.08	4.4	2.66258e+06	1	18.1756	4.25	65	1	K.DLTDGHFENILADNSVNDQTK.I
*	2016-11-16-hjk-Sharma-Shalini-SL3-wt.23908.23908.3	5.468	0.6385	100	2346.09	2346.08	0.7	8754252	1	13.7183	4.25	32.3	1	K.DLTDGHFENILADNSVNDQTK.I
*	2016-11-16-hjk-Sharma-Shalini-SL3-wt.25931.25931.2	3.5343	0.5294	100	1293.75	1293.76	-3.6	3.58956e+06	1	12.7915	8.8	59.1	1	K.ILVVNAAYFVGK.W
*	2016-11-16-hjk-Sharma-Shalini-SL3-wt.23068.23068.2	2.0696	0.3779	99.9	1101.63	1101.63	-0.6	1.81281e+06	1	5.88449	6.56	62.5	2	K.IIELPFQNK.H
*	2016-11-16-hjk-Sharma-Shalini-SL3-wt.26370.26370.2	3.5422	0.4256	100	1199.71	1198.7	0.9	1.74165e+06	1	9.58381	9.08	88.9	2	K.HLSMFILLPK.D
*	2016-11-16-hjk-Sharma-Shalini-SL3-wt.9625.9625.2	2.6362	0.6369	100	1221.55	1221.55	-0.9	7.93289e+06	1	11.9784	3.86	60	1	K.DVEDESTGLEK.I
*	2016-11-16-hjk-Sharma-Shalini-SL3-wt.23092.23092.2	6.3144	0.7247	100	2207.03	2207.04	-2.9	1.70465e+06	1	18.147	6.56	65.6	2	K.QLNSESLSQWTNPSTMANAK.V
*	2016-11-16-hjk-Sharma-Shalini-SL3-wt.17545.17545.2	2.2531	0.2774	99.8	1017.54	1017.54	0.7	7781960	1	7.8518	6.56	64.3	1	K.ACLENLGLK.H
*	2016-11-16-hjk-Sharma-Shalini-SL3-wt.17928.17928.2	7.5842	0.8313	100	1917.81	1917.82	-1.5	2607439	1	28.5323	4.4	87.5	1	K.HIFSEDTSDFSGMSETK.G
*	2016-11-16-hjk-Sharma-Shalini-SL3-wt.17929.17929.3	4.61	0.7686	100	1917.82	1917.82	-0.3	2.85075e+06	1	17.1531	4.4	48	1	K.HIFSEDTSDFSGMSETK.G
*	2016-11-16-hjk-Sharma-Shalini-SL3-wt.13135.13135.2	2.1382	0.4519	99.9	1037.61	1037.61	-1.8	6.42925e+06	1	8.11037	9.08	66.7	2	K.GVALSNVIHK.V
*	2016-11-16-hjk-Sharma-Shalini-SL3-wt.25961.25961.2	5.0218	0.6079	100	1715.88	1715.88	1.9	4386288	1	12.1385	4.72	84	1	K.DELNADHPFIYIIR.H
*	2016-11-16-hjk-Sharma-Shalini-SL3-wt.25944.25944.3	3.2656	0.3726	99.9	1715.87	1715.88	-2.3	2.56384e+06	1	8.99923	4.72	39.1	1	K.DELNADHPFIYIIR.H
P11021	35	44	0.482	654	72333	5.2	U	0.00336215	2.03389	78 kDa glucose-regulated protein OS=Homo sapiens GN=HSPA5 PE=1 SV=2	0	44	0
*	2016-11-16-hjk-Sharma-Shalini-SL3-wt.8383.8383.3	2.4025	0.3502	99.7	1555.79	1555.79	-0.8	2.72821e+06	1	7.27759	6.56	30.8	1	K.NGRVEIIANDQGNR.I
*	2016-11-16-hjk-Sharma-Shalini-SL3-wt.20384.20384.2	3.3495	0.605	100	1566.78	1566.78	-0.9	2132466	1	12.7197	4.46	54.2	2	R.ITPSYVAFTPEGER.L
*	2016-11-16-hjk-Sharma-Shalini-SL3-wt.17948.17948.2	3.0895	0.3603	100	1677.81	1677.81	-0.6	16453802	1	9.39064	4.46	64	1	K.NQLTSNPENTVFDAK.R
*	2016-11-16-hjk-Sharma-Shalini-SL3-wt.15653.15653.2	3.6729	0.5237	100	1430.69	1430.69	-2.3	5904770	1	10.953	4.46	63.6	1	R.TWNDPSVQQDIK.F
*	2016-11-16-hjk-Sharma-Shalini-SL3-wt.15288.15288.2	3.5099	0.4976	100	1604.86	1604.86	-3.6	2.31158e+06	1	9.72231	8.64	69.2	1	K.TKPYIQVDIGGGQTK.T
*	2016-11-16-hjk-Sharma-Shalini-SL3-wt.15285.15285.3	2.8038	0.4148	99.9	1604.86	1604.86	-1.1	8.19665e+06	1	7.1311	8.64	42.6	1	K.TKPYIQVDIGGGQTK.T
*	2016-11-16-hjk-Sharma-Shalini-SL3-wt.28292.28292.2	3.3901	0.6321	100	1536.8	1536.8	1.1	6.20453e+06	1	12.221	4.46	62.5	2	K.TFAPEEISAMVLTK.M
*	2016-11-16-hjk-Sharma-Shalini-SL3-wt.11596.11596.2	1.7275	0.264	99.1	981.488	981.489	-0.6	4.91677e+06	1	7.88799	4.46	57.1	1	K.ETAEAYLGK.K
*	2016-11-16-hjk-Sharma-Shalini-SL3-wt.8450.8450.2	2.6945	0.4367	100	1109.58	1109.58	0.4	1.90363e+06	1	9.22497	6.56	66.7	1	K.ETAEAYLGKK.V
*	2016-11-16-hjk-Sharma-Shalini-SL3-wt.17128.17128.3	3.9783	0.4115	100	2016.06	2016.07	-1.2	2.11185e+06	1	8.79469	8.8	39.6	1	K.KVTHAVVTVPAYFNDAQR.Q
*	2016-11-16-hjk-Sharma-Shalini-SL3-wt.17192.17192.4	2.6321	0.4182	99.7	2016.06	2016.07	-1.5	2.18847e+06	1	7.16948	8.8	13.4	1	K.KVTHAVVTVPAYFNDAQR.Q
*	2016-11-16-hjk-Sharma-Shalini-SL3-wt.19617.19617.3	2.9084	0.2712	99.6	1887.97	1887.97	-1.3	6297527	1	7.15525	7.33	35.4	1	K.VTHAVVTVPAYFNDAQR.Q
*	2016-11-16-hjk-Sharma-Shalini-SL3-wt.21474.21474.2	3.1951	0.4919	100	1217.63	1217.63	0.7	8995396	1	11.4337	6.56	71.4	1	K.DAGTIAGLNVMR.I
	2016-11-16-hjk-Sharma-Shalini-SL3-wt.24443.24443.2	4.5655	0.6352	100	1659.9	1659.9	1.1	7082671	1	13.3868	4.46	70	1	R.IINEPTAAAIAYGLDK.R
*	2016-11-16-hjk-Sharma-Shalini-SL3-wt.22316.22316.3	3.4024	0.5342	100	1816	1816	-0.3	1651946	1	9.13659	6.56	37.5	1	R.IINEPTAAAIAYGLDKR.E
*	2016-11-16-hjk-Sharma-Shalini-SL3-wt.28284.28284.2	3.4412	0.6482	100	2164.99	2164.99	1.5	303349	1	14.3102	3.8	40	1	R.IEIESFYEGEDFSETLTR.A
*	2016-11-16-hjk-Sharma-Shalini-SL3-wt.25228.25228.2	3.8239	0.3911	100	1512.75	1512.75	-1.5	1.23122e+06	1	11.5094	4.72	78.9	1	R.AKFEELNMDLFR.S
*	2016-11-16-hjk-Sharma-Shalini-SL3-wt.25237.25237.3	2.4193	0.4651	100	1512.75	1512.75	-0.2	588344	1	8.58568	4.72	27.5	1	R.AKFEELNMDLFR.S
*	2016-11-16-hjk-Sharma-Shalini-SL3-wt.27839.27839.2	3.1189	0.5474	100	1313.62	1313.62	-0.8	2357910	1	9.14448	4.14	66.7	1	K.FEELNMDLFR.S
*	2016-11-16-hjk-Sharma-Shalini-SL3-wt.9587.9587.2	1.6747	0.3325	99.5	918.477	918.478	-0.5	4823615	1	5.46398	4.14	53.8	1	K.VLEDSDLK.K
*	2016-11-16-hjk-Sharma-Shalini-SL3-wt.6441.6441.2	2.2072	0.4441	100	1046.57	1046.57	-1.2	4.98146e+06	1	9.22853	4.72	60	1	K.VLEDSDLKK.S
*	2016-11-16-hjk-Sharma-Shalini-SL3-wt.19966.19966.2	4.7668	0.5835	100	1588.85	1588.85	-0.8	4.44445e+06	1	9.89859	4.72	75	1	K.KSDIDEIVLVGGSTR.I
*	2016-11-16-hjk-Sharma-Shalini-SL3-wt.19928.19928.3	3.5308	0.545	100	1588.85	1588.85	0.1	6127210	1	10.9283	4.72	38.6	1	K.KSDIDEIVLVGGSTR.I
*	2016-11-16-hjk-Sharma-Shalini-SL3-wt.23309.23309.2	3.8182	0.5277	100	1460.76	1460.76	0.2	2.4395e+06	1	10.5421	4.14	75	1	K.SDIDEIVLVGGSTR.I
*	2016-11-16-hjk-Sharma-Shalini-SL3-wt.3202.3202.2	1.6091	0.3948	99.3	886.534	886.536	-1.7	516735	1	7.86804	10.04	57.1	1	R.NTVVPTKK.S
*	2016-11-16-hjk-Sharma-Shalini-SL3-wt.19065.19065.2	4.3729	0.6228	100	1836.93	1836.93	0.3	2.42807e+06	1	14.3909	6.56	67.9	2	K.SQIFSTASDNQPTVTIK.V
*	2016-11-16-hjk-Sharma-Shalini-SL3-wt.6519.6519.2	2.7452	0.5493	100	1191.63	1191.64	-4.2	4.0262e+06	1	9.89906	6.56	82.4	1	K.VYEGERPLTK.D
*	2016-11-16-hjk-Sharma-Shalini-SL3-wt.26885.26885.3	3.4909	0.5041	100	1934.01	1934.01	0.4	560385	1	11.9835	5.63	39.3	5	K.DNHLLGTFDLTGIPPAPR.G
*	2016-11-16-hjk-Sharma-Shalini-SL3-wt.7157.7157.2	1.8007	0.332	99.6	1074.55	1074.55	-0.8	4.50679e+06	1	7.88208	6.56	56.2	1	K.ITITNDQNR.L
*	2016-11-16-hjk-Sharma-Shalini-SL3-wt.21192.21192.2	2.926	0.4646	100	1316.64	1316.64	-0.6	3.26566e+06	1	8.48767	4.46	65	1	R.NELESYAYSLK.N
*	2016-11-16-hjk-Sharma-Shalini-SL3-wt.23229.23229.2	7.339	0.6463	100	1974.91	1974.91	-0.6	9395305	1	17.4402	4.12	86.2	1	K.IEWLESHQDADIEDFK.A
*	2016-11-16-hjk-Sharma-Shalini-SL3-wt.23192.23192.3	5.0291	0.5851	100	1974.91	1974.91	-1.1	2.77768e+06	1	12.5163	4.12	33.3	1	K.IEWLESHQDADIEDFK.A
*	2016-11-16-hjk-Sharma-Shalini-SL3-wt.23341.23341.2	3.2984	0.433	100	1397.79	1397.79	-1.8	2.48588e+06	1	8.28719	4.14	78.9	2	K.ELEEIVQPIISK.L
*	2016-11-16-hjk-Sharma-Shalini-SL3-wt.11146.11146.2	2.8977	0.2908	99.7	1818.83	1818.84	-2.8	4.00644e+06	1	7.66703	3.96	53.1	1	K.LYGSAGPPPTGEEDTAEK.D
*	2016-11-16-hjk-Sharma-Shalini-SL3-wt.17508.17508.2	4.8047	0.6941	100	2175.99	2175.99	-1	1.38848e+06	1	16.9715	3.8	60.6	2	K.LYGSAGPPPTGEEDTAEKDEL.-
P53999	9	9	0.48	127	14395	9.6	U	0.00354145	2.01995	Activated RNA polymerase II transcriptional coactivator p15 OS=Homo sapiens GN=SUB1 PE=1 SV=3	0	9	0
*	2016-11-16-hjk-Sharma-Shalini-SL3-wt.3676.3676.2	2.5092	0.5418	100	995.588	995.588	-0.8	1.44332e+06	1	9.20742	8.8	62.5	1	K.QVAPEKPVK.K
*	2016-11-16-hjk-Sharma-Shalini-SL3-wt.2230.2230.2	2.6943	0.2753	99.9	1123.68	1123.68	-1.3	1.86484e+06	1	9.69199	9.68	61.1	1	K.QVAPEKPVKK.Q
*	2016-11-16-hjk-Sharma-Shalini-SL3-wt.14695.14695.2	3.5932	0.4921	100	1699.77	1699.77	-1.9	1.81708e+06	1	9.04475	6.56	46.2	1	K.QSSSSRDDNMFQIGK.M
*	2016-11-16-hjk-Sharma-Shalini-SL3-wt.14643.14643.3	3.2507	0.3434	100	1699.77	1699.77	-0.7	5.04372e+06	1	7.39907	6.56	30.8	1	K.QSSSSRDDNMFQIGK.M
*	2016-11-16-hjk-Sharma-Shalini-SL3-wt.19499.19499.2	2.4873	0.5922	100	1067.48	1067.48	-1	3691553	1	10.985	4.46	62.5	1	R.DDNMFQIGK.M
*	2016-11-16-hjk-Sharma-Shalini-SL3-wt.21829.21829.2	2.1199	0.5623	100	1414.56	1414.57	-0.4	3.64043e+06	1	7.08921	3.96	72.2	1	R.EYWMDPEGEMK.P
*	2016-11-16-hjk-Sharma-Shalini-SL3-wt.26079.26079.2	3.7074	0.5876	100	1499.78	1499.79	-1.1	12408464	1	11.1406	6.56	71.4	1	K.GISLNPEQWSQLK.E
*	2016-11-16-hjk-Sharma-Shalini-SL3-wt.15690.15690.2	2.741	0.4203	100	1260.61	1260.61	-1.3	16505173	1	9.11893	3.96	57.9	1	K.EQISDIDDAVR.K
*	2016-11-16-hjk-Sharma-Shalini-SL3-wt.12666.12666.2	2.8406	0.4648	100	1388.7	1388.7	-1.3	2149048	1	7.78944	4.4	54.5	1	K.EQISDIDDAVRK.L
P30050	7	7	0.479	165	17819	9.4	U	0.0021201	2.01301	60S ribosomal protein L12 OS=Homo sapiens GN=RPL12 PE=1 SV=1	0	7	0
*	2016-11-16-hjk-Sharma-Shalini-SL3-wt.11860.11860.2	4.075	0.5791	100	1418.69	1418.69	-1.5	2.71303e+06	1	11.1691	6.56	74.1	1	R.CTGGEVGATSALAPK.I
*	2016-11-16-hjk-Sharma-Shalini-SL3-wt.17270.17270.2	2.1965	0.4724	100	881.547	881.545	1.2	3.87537e+06	1	9.29858	9.08	80	1	K.IGPLGLSPK.K
*	2016-11-16-hjk-Sharma-Shalini-SL3-wt.3907.3907.2	2.0514	0.2419	99.6	845.472	845.473	-0.9	733264	1	5.92096	6.56	71.4	1	K.KVGDDIAK.A
*	2016-11-16-hjk-Sharma-Shalini-SL3-wt.25588.25588.2	4.3735	0.5818	100	1666.97	1666.97	-1.1	2.83932e+06	1	13.3072	6.56	74.1	1	R.QAQIEVVPSASALIIK.A
*	2016-11-16-hjk-Sharma-Shalini-SL3-wt.25652.25652.2	5.1832	0.7341	100	1685.87	1685.86	3.1	2.59845e+06	1	21.0081	5.63	78.6	1	K.HSGNITFDEIVNIAR.Q
*	2016-11-16-hjk-Sharma-Shalini-SL3-wt.25641.25641.3	4.0876	0.6064	100	1685.86	1685.86	-0.7	994096	1	13.0374	5.63	40	1	K.HSGNITFDEIVNIAR.Q
*	2016-11-16-hjk-Sharma-Shalini-SL3-wt.15951.15951.2	4.9196	0.63	100	1675.8	1675.81	-2.5	1.4971e+06	1	15.2682	4.46	70.4	1	K.EILGTAQSVGCNVDGR.H
P63167	4	4	0.472	89	10366	7.4	U	0.00224601	1.96483	Dynein light chain 1, cytoplasmic OS=Homo sapiens GN=DYNLL1 PE=1 SV=1	0	4	0
*	2016-11-16-hjk-Sharma-Shalini-SL3-wt.23528.23528.2	7.1704	0.7805	100	2514.04	2514.04	-1.1	1.78271e+06	1	18.2824	3.8	78.8	1	K.NADMSEEMQQDSVECATQALEK.Y
*	2016-11-16-hjk-Sharma-Shalini-SL3-wt.4852.4852.2	2.0915	0.2075	99.3	895.537	895.536	1.3	6.55041e+06	1	6.71025	8.8	78.6	1	K.DIAAHIKK.E
	2016-11-16-hjk-Sharma-Shalini-SL3-wt.13436.13436.3	3.8197	0.434	100	1530.76	1530.76	-0.6	4554254	1	10.1286	9.16	56.8	1	K.KYNPTWHCIVGR.N
	2016-11-16-hjk-Sharma-Shalini-SL3-wt.16560.16560.3	3.2434	0.5327	99.6	1402.66	1402.67	-5.1	3385953	1	9.81162	8.23	34.2	1	K.YNPTWHCIVGR.N
Q9UBI6	3	4	0.472	72	8006	9	U	0.00277632	1.96483	Guanine nucleotide-binding protein G(I)/G(S)/G(O) subunit gamma-12 OS=Homo sapiens GN=GNG12 PE=1 SV=3	0	4	0
*	2016-11-16-hjk-Sharma-Shalini-SL3-wt.5699.5699.2	2.4474	0.4405	100	1146.59	1146.59	-0.4	698818	1	9.00636	10.06	63.2	1	K.TASTNNIAQAR.R
*	2016-11-16-hjk-Sharma-Shalini-SL3-wt.4012.4012.2	1.9292	0.2451	99.6	900.537	900.537	-0.5	1.13675e+06	1	4.54699	12	75	1	R.RTVQQLR.L
*	2016-11-16-hjk-Sharma-Shalini-SL3-wt.28985.28985.2	3.4365	0.6196	100	1727.92	1727.92	-1.6	508303	1	12.6384	4.46	56.5	2	R.SDPLLIGIPTSENPFK.D
P15924	161	193	0.47	2871	331774	6.8	U	0.00335944	1.95121	Desmoplakin OS=Homo sapiens GN=DSP PE=1 SV=3	0	193	0
*	2016-11-16-hjk-Sharma-Shalini-SL3-wt.6156.6156.2	2.0337	0.3541	99.9	844.416	844.416	0	2.75352e+06	1	9.16521	4.46	61.5	1	R.AESGPDLR.Y
*	2016-11-16-hjk-Sharma-Shalini-SL3-wt.13181.13181.3	3.4548	0.5742	100	1996.94	1995.94	-1.6	2.53591e+06	1	11.0922	4.72	30.4	1	R.AESGPDLRYEVTSGGGGTSR.M
*	2016-11-16-hjk-Sharma-Shalini-SL3-wt.5592.5592.2	2.6608	0.404	100	1170.54	1170.54	-0.2	1.69139e+06	1	9.47948	6.56	59.1	1	R.YEVTSGGGGTSR.M
*	2016-11-16-hjk-Sharma-Shalini-SL3-wt.10570.10570.3	5.3848	0.724	100	2245.98	2245.99	-5	2.57252e+06	1	13.4119	6.56	35.1	1	R.RGVITDQNSDGYCQTGTMSR.H
*	2016-11-16-hjk-Sharma-Shalini-SL3-wt.26875.26875.3	4.9368	0.6293	100	2502.12	2502.13	-1.3	742543	1	11.6043	5.63	40.4	1	R.HQNQNTIQELLQNCSDCLMR.A
*	2016-11-16-hjk-Sharma-Shalini-SL3-wt.19167.19167.2	2.3883	0.4494	100	1139.67	1139.67	-1.1	32107614	1	12.598	4.46	73.3	1	R.AELIVQPELK.Y
*	2016-11-16-hjk-Sharma-Shalini-SL3-wt.14052.14052.2	2.5034	0.514	100	1022.53	1022.53	0.2	17111476	1	13.9087	6.56	68.8	2	K.YGDGIQLTR.S
*	2016-11-16-hjk-Sharma-Shalini-SL3-wt.7672.7672.2	2.8135	0.7304	100	1325.56	1325.56	-1.1	2.08998e+06	1	12.866	6.56	61.1	1	R.QMGQPCDAYQK.R
*	2016-11-16-hjk-Sharma-Shalini-SL3-wt.14754.14754.2	3.7466	0.427	100	1314.73	1314.73	-1.1	17723842	1	11.2374	10.06	83.3	1	K.RLLQLQEQMR.A
*	2016-11-16-hjk-Sharma-Shalini-SL3-wt.14729.14729.3	2.5463	0.4725	99.9	1314.73	1314.73	-1.5	4149817	1	8.04732	10.06	45.2	1	K.RLLQLQEQMR.A
*	2016-11-16-hjk-Sharma-Shalini-SL3-wt.17504.17504.2	2.0785	0.1414	99.1	1158.63	1158.63	-0.4	11669098	1	7.18219	6.56	62.5	1	R.LLQLQEQMR.A
*	2016-11-16-hjk-Sharma-Shalini-SL3-wt.19384.19384.2	5.2775	0.7648	100	1893.77	1893.77	-2.4	3323047	1	11.9525	4.46	79.3	1	K.GGGGYTCQSGSGWDEFTK.H
*	2016-11-16-hjk-Sharma-Shalini-SL3-wt.16296.16296.2	3.3517	0.6903	100	1375.62	1375.62	-1.2	13620672	1	17.8995	7.11	70	1	K.HVTSECLGWMR.Q
*	2016-11-16-hjk-Sharma-Shalini-SL3-wt.16284.16284.3	2.5623	0.5	100	1375.62	1375.62	-0.6	4.31446e+06	1	8.35375	7.11	34.3	1	K.HVTSECLGWMR.Q
*	2016-11-16-hjk-Sharma-Shalini-SL3-wt.16959.16959.2	3.4529	0.5028	100	1271.7	1271.71	-1.9	23252364	1	8.89357	10.06	70	1	R.QLQNIIQATSR.E
*	2016-11-16-hjk-Sharma-Shalini-SL3-wt.9091.9091.2	1.8018	0.406	99.8	834.438	834.439	-0.8	5913098	1	6.85149	6.56	66.7	1	R.MSQLEVK.E
*	2016-11-16-hjk-Sharma-Shalini-SL3-wt.9940.9940.4	3.0949	0.4589	99.9	2050.05	2050.06	-1.8	1.04606e+06	1	5.89516	5.8	23.8	1	K.LKQESDQLVLNQHPASDK.I
*	2016-11-16-hjk-Sharma-Shalini-SL3-wt.9973.9973.2	2.1456	0.2917	99.8	884.465	884.466	-1.4	11534515	1	9.26315	7.11	100	1	K.CIDVHLK.E
*	2016-11-16-hjk-Sharma-Shalini-SL3-wt.5429.5429.2	2.7585	0.3014	100	1098.64	1098.64	-0.7	2.66067e+06	1	6.72358	10.99	75	1	K.RQVQNLVNK.S
*	2016-11-16-hjk-Sharma-Shalini-SL3-wt.5003.5003.2	2.1547	0.2475	99.4	981.659	981.657	2.2	1.30273e+06	1	5.7263	11.18	71.4	1	K.KIVQLKPR.N
*	2016-11-16-hjk-Sharma-Shalini-SL3-wt.9454.9454.2	1.6713	0.282	99.1	834.402	834.403	-1.1	1.9258e+06	1	6.4035	4.46	63.6	1	K.GDECILK.D
*	2016-11-16-hjk-Sharma-Shalini-SL3-wt.25140.25140.3	2.8479	0.5853	100	1780.84	1780.84	0.3	625650	1	10.0134	5.63	35	1	K.SLVSWHYCMIDIEK.I
*	2016-11-16-hjk-Sharma-Shalini-SL3-wt.26941.26941.2	4.0237	0.4249	100	1749.9	1747.9	-4.3	731887	1	10.7427	4.72	58.3	2	K.TIADLELHYQEFIR.N
*	2016-11-16-hjk-Sharma-Shalini-SL3-wt.26832.26832.3	3.7093	0.4961	100	1747.9	1747.9	-1	888225	1	9.73569	4.72	33.3	3	K.TIADLELHYQEFIR.N
*	2016-11-16-hjk-Sharma-Shalini-SL3-wt.10919.10919.2	3.3249	0.7017	100	1429.55	1429.55	-0.4	1.56111e+06	1	8.29201	3.96	58.3	1	R.NSQGSEMFGDDDK.R
*	2016-11-16-hjk-Sharma-Shalini-SL3-wt.8252.8252.2	2.3432	0.4751	100	1165.58	1165.58	0.1	3.26506e+06	1	7.95385	6.56	66.7	1	K.IQSQFTDAQK.H
*	2016-11-16-hjk-Sharma-Shalini-SL3-wt.22156.22156.3	7.2744	0.5937	100	2637.3	2635.29	2.3	3.20276e+06	1	11.5463	4.57	47.5	1	K.VIETNRENDKQETWMLMELQK.I
*	2016-11-16-hjk-Sharma-Shalini-SL3-wt.23952.23952.3	2.6542	0.4901	99.7	1922.9	1922.9	2.7	1.73597e+06	1	8.16906	4.4	30	1	R.ENDKQETWMLMELQK.I
*	2016-11-16-hjk-Sharma-Shalini-SL3-wt.26469.26469.2	3.7737	0.6131	100	1436.69	1436.69	0.3	1.83858e+06	1	9.59608	4.46	65	1	K.QETWMLMELQK.I
*	2016-11-16-hjk-Sharma-Shalini-SL3-wt.11314.11314.2	4.1624	0.6793	100	1716.9	1716.9	-1.9	1.94912e+06	1	13.8432	7.41	75	1	K.NLPLADQGSSHHITVK.I
*	2016-11-16-hjk-Sharma-Shalini-SL3-wt.11294.11294.3	3.5064	0.5854	100	1716.9	1716.9	-0.8	34121228	1	10.407	7.41	36.5	2	K.NLPLADQGSSHHITVK.I
*	2016-11-16-hjk-Sharma-Shalini-SL3-wt.20324.20324.2	1.3925	0.4613	99.7	866.419	866.419	-0.1	3.37419e+06	1	8.09422	6.56	58.3	1	K.DMLANFR.G
*	2016-11-16-hjk-Sharma-Shalini-SL3-wt.26422.26422.2	5.4656	0.6764	100	2138.06	2138.05	1.8	1.00943e+06	1	16.5338	4.46	63.3	1	K.LENINGVTDGYLNSLCTVR.A
*	2016-11-16-hjk-Sharma-Shalini-SL3-wt.8242.8242.2	2.0653	0.2512	99.7	957.573	957.573	0.4	3218249	1	5.94413	8.8	78.6	1	K.IKNDLNLK.K
*	2016-11-16-hjk-Sharma-Shalini-SL3-wt.5575.5575.2	2.827	0.1302	99.6	1085.67	1085.67	-1.8	1.87603e+06	1	4.46099	9.68	81.2	1	K.IKNDLNLKK.S
*	2016-11-16-hjk-Sharma-Shalini-SL3-wt.4959.4959.2	2.048	0.1513	99	844.487	844.489	-1.4	1.85119e+06	1	6.47195	8.8	75	1	K.NDLNLKK.S
*	2016-11-16-hjk-Sharma-Shalini-SL3-wt.22032.22032.2	6.7667	0.7432	100	2433.2	2433.2	-0.4	3109315	1	18.5254	5.63	61.5	2	K.AQQIHSQTSQQYPLYDLDLGK.F
*	2016-11-16-hjk-Sharma-Shalini-SL3-wt.22041.22041.3	5.943	0.7058	100	2433.2	2433.2	-2.2	25270622	1	15.3215	5.63	50	2	K.AQQIHSQTSQQYPLYDLDLGK.F
*	2016-11-16-hjk-Sharma-Shalini-SL3-wt.5627.5627.2	2.0008	0.2896	99.8	832.452	832.452	-0.4	7602114	1	6.87485	6.56	72.7	1	K.VTQLTDR.W
*	2016-11-16-hjk-Sharma-Shalini-SL3-wt.11028.11028.2	3.461	0.6041	100	1479.65	1478.65	-3.5	1.57882e+06	1	8.57414	8.22	73.7	1	R.NYRDNYQAFCK.W
*	2016-11-16-hjk-Sharma-Shalini-SL3-wt.8947.8947.2	2.0688	0.2539	99.7	937.43	937.429	0.6	2.25114e+06	1	6.93508	4.46	64.3	1	R.QDSLESMK.F
*	2016-11-16-hjk-Sharma-Shalini-SL3-wt.10404.10404.2	1.86	0.4205	99.9	1026.47	1026.47	0	2989337	1	8.60164	6.56	62.5	1	K.FGDSNTVMR.F
*	2016-11-16-hjk-Sharma-Shalini-SL3-wt.5393.5393.2	2.1419	0.5272	100	984.511	984.511	0.5	2.92699e+06	1	9.84229	7.33	81.2	1	K.NLHSEISGK.R
*	2016-11-16-hjk-Sharma-Shalini-SL3-wt.4488.4488.2	2.0386	0.5401	100	1140.61	1140.61	-0.4	5597056	1	9.06008	9.08	70.6	1	K.NLHSEISGKR.D
*	2016-11-16-hjk-Sharma-Shalini-SL3-wt.13938.13938.2	2.681	0.4314	100	1118.59	1118.59	-0.2	4.28429e+06	1	10.8164	6.56	61.1	1	K.IAELCANSIK.D
*	2016-11-16-hjk-Sharma-Shalini-SL3-wt.23998.23998.3	4.6095	0.6143	100	2123.09	2123.09	0.2	4.30793e+06	1	11.0784	5.63	36.4	2	R.TMIQSPSGVILQEAADVHAR.Y
*	2016-11-16-hjk-Sharma-Shalini-SL3-wt.19488.19488.2	1.9604	0.3392	99.8	907.524	907.525	-0.5	8779016	1	6.29091	6.56	75	2	R.YIELLTR.S
*	2016-11-16-hjk-Sharma-Shalini-SL3-wt.19683.19683.2	1.7155	0.222	99.1	867.465	867.464	0.4	5.17561e+06	1	4.53839	6.56	58.3	1	R.FLSEMLK.S
*	2016-11-16-hjk-Sharma-Shalini-SL3-wt.20555.20555.2	2.4091	0.4075	100	1129.61	1129.61	0.3	2.88262e+06	1	6.7272	3.96	62.5	2	K.IEVLEEELR.L
*	2016-11-16-hjk-Sharma-Shalini-SL3-wt.8426.8426.2	2.3451	0.5436	100	1160.5	1160.5	-0.5	1.28251e+06	1	9.42787	6.56	73.3	1	K.YQAECSQFK.A
*	2016-11-16-hjk-Sharma-Shalini-SL3-wt.13909.13909.2	2.5687	0.4589	100	1139.55	1139.55	-0.6	5382054	1	10.8326	3.96	68.8	1	R.LTYEIEDEK.R
*	2016-11-16-hjk-Sharma-Shalini-SL3-wt.11147.11147.2	2.6126	0.4944	100	1295.65	1295.65	1.4	1.72108e+06	1	9.85467	4.4	61.1	1	R.LTYEIEDEKR.R
*	2016-11-16-hjk-Sharma-Shalini-SL3-wt.7275.7275.2	3.0787	0.296	100	1251.59	1251.6	-2	2820548	1	6.91559	4.72	100	1	K.SVEDRFDQQK.N
*	2016-11-16-hjk-Sharma-Shalini-SL3-wt.8030.8030.2	2.3602	0.524	100	1023.47	1023.47	0.7	2407694	1	8.25899	4.46	71.4	1	K.NDYDQLQK.A
*	2016-11-16-hjk-Sharma-Shalini-SL3-wt.10434.10434.2	2.1278	0.5521	100	1044.57	1044.57	-0.4	9973977	1	9.99262	4.46	66.7	1	R.VLLQEEGTR.K
*	2016-11-16-hjk-Sharma-Shalini-SL3-wt.4949.4949.2	3.5992	0.0761	99.8	1279.66	1279.66	-2.1	2.33606e+06	1	6.23452	6.56	77.8	1	R.KREYENELAK.V
*	2016-11-16-hjk-Sharma-Shalini-SL3-wt.8606.8606.3	3.6633	0.5402	100	1661.78	1661.78	-0.1	4.95593e+06	1	11.5708	7.33	52.6	1	K.VRNHYNEEMSNLR.N
*	2016-11-16-hjk-Sharma-Shalini-SL3-wt.9961.9961.2	3.2233	0.656	100	1406.61	1406.61	-3.4	4399729	1	13.8084	5.63	77.8	2	R.NHYNEEMSNLR.N
*	2016-11-16-hjk-Sharma-Shalini-SL3-wt.9983.9983.3	2.7926	0.5873	100	1407.61	1406.61	-2.2	1929899	1	10.0219	5.63	38.2	1	R.NHYNEEMSNLR.N
*	2016-11-16-hjk-Sharma-Shalini-SL3-wt.11951.11951.2	3.9153	0.5145	100	1352.71	1352.71	2.4	8009047	1	9.78152	6.56	85	1	R.NKYETEINITK.T
*	2016-11-16-hjk-Sharma-Shalini-SL3-wt.13500.13500.2	1.3691	0.3698	99.1	987.547	987.547	0.1	22894702	1	6.42154	4.72	66.7	1	R.DLKDEIVR.L
*	2016-11-16-hjk-Sharma-Shalini-SL3-wt.18078.18078.2	4.0947	0.4798	100	1387.72	1387.72	-0.4	8667622	1	10.7915	4.46	72.7	1	R.LNDSILQATEQR.R
*	2016-11-16-hjk-Sharma-Shalini-SL3-wt.13453.13453.2	2.2414	0.1675	99.3	1009.57	1009.57	-1.8	3346986	1	5.6418	5.63	85.7	2	K.QHLEIELK.Q
*	2016-11-16-hjk-Sharma-Shalini-SL3-wt.5553.5553.2	2.5267	0.3668	100	875.446	875.447	-1.5	1.90665e+06	1	6.83919	4.46	71.4	1	K.QSLEEAAK.T
*	2016-11-16-hjk-Sharma-Shalini-SL3-wt.14466.14466.2	3.6982	0.5058	100	1353.64	1353.64	-1.3	3050586	1	7.88661	4.72	83.3	1	R.RWEYENELSK.V
*	2016-11-16-hjk-Sharma-Shalini-SL3-wt.18068.18068.2	4.2447	0.4065	100	1592.83	1592.83	-0.9	8.27948e+06	1	8.18114	4.72	72.7	1	K.VRNNYDEEIISLK.N
*	2016-11-16-hjk-Sharma-Shalini-SL3-wt.18066.18066.3	3.4047	0.4734	100	1592.83	1592.83	-0.4	3.7576e+06	1	9.24798	4.72	45.9	1	K.VRNNYDEEIISLK.N
*	2016-11-16-hjk-Sharma-Shalini-SL3-wt.20919.20919.2	3.0644	0.381	100	1337.66	1337.66	-0.2	4257456	1	8.8862	4.14	65	1	R.NNYDEEIISLK.N
*	2016-11-16-hjk-Sharma-Shalini-SL3-wt.18523.18523.2	3.2395	0.4328	100	1336.67	1336.67	-1.6	2843594	1	8.98242	4.46	70	1	K.NQFETEINITK.T
*	2016-11-16-hjk-Sharma-Shalini-SL3-wt.10070.10070.2	3.4359	0.5727	100	1200.64	1200.64	-0.3	3.64729e+06	1	11.569	9.08	94.1	1	K.TTIHQLTMQK.E
*	2016-11-16-hjk-Sharma-Shalini-SL3-wt.10086.10086.3	2.1449	0.4369	99.9	1200.64	1200.64	-0.2	2.60969e+06	1	7.49435	9.08	38.2	1	K.TTIHQLTMQK.E
*	2016-11-16-hjk-Sharma-Shalini-SL3-wt.9508.9508.2	1.6918	0.294	99.3	930.5	930.5	-0.8	4.72781e+06	1	6.9965	6.56	66.7	1	R.AQIDNLTR.E
*	2016-11-16-hjk-Sharma-Shalini-SL3-wt.13844.13844.2	3.0567	0.4249	100	1290.66	1290.66	-0.6	11132426	1	9.73806	6.56	65	1	K.NTLTQTTENLR.R
*	2016-11-16-hjk-Sharma-Shalini-SL3-wt.11550.11550.2	2.5602	0.2464	99.8	1446.77	1446.77	-0.4	2.7809e+06	1	5.23872	10.06	47.6	1	K.NTLTQTTENLRR.V
*	2016-11-16-hjk-Sharma-Shalini-SL3-wt.4662.4662.2	3.9808	0.3562	100	1272.65	1272.65	-1.2	6.50609e+06	1	6.34617	4.72	100	1	R.RVEEDIQQQK.A
*	2016-11-16-hjk-Sharma-Shalini-SL3-wt.5266.5266.2	2.6757	0.5379	100	1116.55	1116.55	-0.3	1.7263e+06	1	9.72751	4.14	73.3	1	R.VEEDIQQQK.A
*	2016-11-16-hjk-Sharma-Shalini-SL3-wt.11685.11685.2	3.3013	0.2808	100	1142.65	1142.65	-0.3	2.50658e+06	1	7.70612	6.56	87.5	1	R.KQQLEVELR.Q
*	2016-11-16-hjk-Sharma-Shalini-SL3-wt.15510.15510.2	2.5189	0.2432	99.9	1014.56	1014.56	-0.4	7.48694e+06	1	7.52344	4.46	71.4	1	K.QQLEVELR.Q
*	2016-11-16-hjk-Sharma-Shalini-SL3-wt.9037.9037.2	1.7996	0.228	99.2	893.472	893.473	-0.8	1.9225e+06	1	5.75169	6.56	63.6	1	R.VQYDLQK.A
*	2016-11-16-hjk-Sharma-Shalini-SL3-wt.4518.4518.2	3.28	0.5069	100	1135.56	1135.56	-0.6	1.50002e+06	1	12.5742	6.56	68.4	1	K.ANSSATETINK.L
*	2016-11-16-hjk-Sharma-Shalini-SL3-wt.10695.10695.2	2.0123	0.3671	99.9	964.52	964.521	-0.9	9793825	1	5.4484	6.56	81.8	1	R.LRIDYER.V
*	2016-11-16-hjk-Sharma-Shalini-SL3-wt.5916.5916.2	2.4207	0.4611	100	1144.6	1144.6	1	3741547	1	8.9073	4.72	64.3	1	K.QKVEEELNR.L
*	2016-11-16-hjk-Sharma-Shalini-SL3-wt.14235.14235.2	2.2057	0.4322	99.9	1233.62	1233.61	1.3	5.35646e+06	1	6.99759	4.4	61.1	1	K.KLEEELEGMR.R
*	2016-11-16-hjk-Sharma-Shalini-SL3-wt.24352.24352.2	4.0131	0.4982	100	1685.94	1685.94	-2.1	15247831	1	8.54384	6.56	60.7	1	K.ITNLTQQLEQASIVK.K
*	2016-11-16-hjk-Sharma-Shalini-SL3-wt.20918.20918.3	4.2482	0.558	100	1814.04	1814.04	-1.5	3662941	1	9.91557	8.8	38.5	1	K.ITNLTQQLEQASIVKK.R
*	2016-11-16-hjk-Sharma-Shalini-SL3-wt.10714.10714.2	1.6609	0.2782	99.2	924.49	924.49	0.5	2.08622e+06	1	8.16512	5.63	50	1	R.DVLDGHLR.E
*	2016-11-16-hjk-Sharma-Shalini-SL3-wt.11857.11857.2	2.4903	0.2882	99.9	1159.64	1159.64	-0.6	5.10654e+06	1	6.65666	6.56	66.7	1	R.RLSSEVEALR.R
*	2016-11-16-hjk-Sharma-Shalini-SL3-wt.9897.9897.3	2.6923	0.2907	99.9	1315.74	1315.74	-0.5	7.96096e+06	1	5.87479	10.06	38.7	1	R.RLSSEVEALRR.Q
*	2016-11-16-hjk-Sharma-Shalini-SL3-wt.8698.8698.2	4.1507	0.5049	100	1357.74	1357.74	-0.7	1.91912e+06	1	8.71564	6.56	95	1	R.RQLLQEQESVK.Q
*	2016-11-16-hjk-Sharma-Shalini-SL3-wt.15208.15208.2	2.2192	0.3835	99.9	1146.64	1146.64	-0.6	3147851	1	6.61583	6.56	55.6	1	R.LQSLTENLTK.E
*	2016-11-16-hjk-Sharma-Shalini-SL3-wt.18247.18247.2	2.8177	0.5008	100	1298.64	1298.64	0.6	6.74484e+06	1	12.3364	4.4	68.8	1	K.EHLMLEEELR.N
*	2016-11-16-hjk-Sharma-Shalini-SL3-wt.17715.17715.3	2.2177	0.4332	99.9	1306.68	1306.67	0.7	2219636	1	6.98825	4.72	35.5	1	R.NLRLEYDDLR.R
*	2016-11-16-hjk-Sharma-Shalini-SL3-wt.14827.14827.3	2.9984	0.4385	100	1462.77	1462.78	-0.8	9350419	1	7.29891	6.56	54.5	1	R.NLRLEYDDLRR.G
*	2016-11-16-hjk-Sharma-Shalini-SL3-wt.18689.18689.2	2.2226	0.2713	99.8	929.541	929.541	-0.9	5674902	1	6.50369	6.56	85.7	2	K.NATILELR.S
*	2016-11-16-hjk-Sharma-Shalini-SL3-wt.7473.7473.2	2.24	0.3623	100	1059.55	1059.55	-0.3	3.96799e+06	1	9.22073	10.06	66.7	1	R.SQLQISNNR.T
*	2016-11-16-hjk-Sharma-Shalini-SL3-wt.8943.8943.2	2.6954	0.1233	99.6	1158.61	1158.61	-1.2	10231270	1	4.54001	4.72	62.5	1	R.ENLRQEIEK.F
*	2016-11-16-hjk-Sharma-Shalini-SL3-wt.6425.6425.2	2.7806	0.4504	100	1261.59	1261.6	-0.6	8.23823e+06	1	8.97208	6.56	72.2	1	K.NQCTQVVQER.E
*	2016-11-16-hjk-Sharma-Shalini-SL3-wt.12325.12325.2	2.2787	0.2057	99.6	1285.68	1285.69	-0.8	3.0884e+06	1	5.52027	4.72	64.7	1	R.LQRLEDELNR.A
*	2016-11-16-hjk-Sharma-Shalini-SL3-wt.8321.8321.2	2.0059	0.3011	99	890.445	888.442	-3.8	5.60317e+06	1	5.736	4.14	66.7	2	R.LEDELNR.A
*	2016-11-16-hjk-Sharma-Shalini-SL3-wt.5732.5732.2	1.84	0.2356	99.3	906.453	906.453	0.4	5166543	1	6.28623	4.46	53.8	1	K.STLEAETR.V
*	2016-11-16-hjk-Sharma-Shalini-SL3-wt.17455.17455.2	3.526	0.6641	100	1414.71	1414.71	-0.6	5.6025e+06	1	10.4268	6.56	66.7	2	K.QQIQNDLNQWK.T
*	2016-11-16-hjk-Sharma-Shalini-SL3-wt.8241.8241.2	2.2467	0.0963	99.2	1103.58	1103.58	-0.2	5265322	1	4.42241	6.56	66.7	1	K.NSLRSEIER.L
*	2016-11-16-hjk-Sharma-Shalini-SL3-wt.9368.9368.3	3.0523	0.4965	100	1921.91	1921.91	-1.4	2.4406e+06	1	8.89466	4.25	36.7	1	K.LEDSTRETQSQLETER.S
*	2016-11-16-hjk-Sharma-Shalini-SL3-wt.14534.14534.2	4.4309	0.6579	100	1713.72	1713.73	-3.1	3353655	1	12.4326	3.96	66.7	2	R.ETQTECEWTVDTSK.L
*	2016-11-16-hjk-Sharma-Shalini-SL3-wt.21388.21388.2	7.5633	0.7114	100	1839.93	1839.93	-1.3	3514196	1	13.1625	6.56	92.9	1	K.KVTAMQLYECQLIDK.T
*	2016-11-16-hjk-Sharma-Shalini-SL3-wt.21374.21374.3	4.3917	0.4919	100	1840.93	1839.93	-1.4	3.41504e+06	1	10.8866	6.56	54.5	1	K.KVTAMQLYECQLIDK.T
*	2016-11-16-hjk-Sharma-Shalini-SL3-wt.24928.24928.2	5.1961	0.5095	100	1711.84	1711.84	-1.2	3115057	1	10.9343	4.46	73.9	1	K.VTAMQLYECQLIDK.T
*	2016-11-16-hjk-Sharma-Shalini-SL3-wt.28382.28382.2	4.3496	0.6157	100	1603.83	1603.83	-1.4	13716460	1	12.0295	4.14	68	2	K.SVEEVASEIQPFLR.G
*	2016-11-16-hjk-Sharma-Shalini-SL3-wt.11062.11062.2	1.891	0.2468	99.7	809.44	809.44	0	22774444	1	10.4651	6.56	72.7	1	K.YSLVEAK.R
*	2016-11-16-hjk-Sharma-Shalini-SL3-wt.28549.28549.4	6.4484	0.6725	100	3118.65	3118.66	-0.6	833195	1	13.1825	5.74	17.7	1	K.KLISPESTVMLLEAQAATGGIIDPHRNEK.L
*	2016-11-16-hjk-Sharma-Shalini-SL3-wt.13606.13606.2	2.2656	0.4878	100	945.535	945.536	-1.2	13954502	1	9.7465	6.56	56.2	1	K.LTVDSAIAR.D
*	2016-11-16-hjk-Sharma-Shalini-SL3-wt.21926.21926.2	2.0158	0.5202	99.9	1008.46	1008.46	-2.5	10882102	1	11.1358	3.96	66.7	2	R.DLIDFDDR.Q
*	2016-11-16-hjk-Sharma-Shalini-SL3-wt.22300.22300.2	5.3413	0.4972	100	1939.94	1939.94	-2.1	1.38996e+06	1	10.1773	4.25	48.3	2	R.DLIDFDDRQQIYAAEK.A
*	2016-11-16-hjk-Sharma-Shalini-SL3-wt.22282.22282.3	3.0588	0.5199	100	1939.94	1939.94	0.4	1.86228e+06	1	8.52081	4.25	33.9	2	R.DLIDFDDRQQIYAAEK.A
*	2016-11-16-hjk-Sharma-Shalini-SL3-wt.6599.6599.2	2.5604	0.4618	100	950.492	950.494	-1.9	4.11856e+06	1	8.01722	6.56	71.4	1	R.QQIYAAEK.A
*	2016-11-16-hjk-Sharma-Shalini-SL3-wt.11714.11714.2	2.1576	0.4022	100	933.525	933.525	-0.7	3.63486e+06	1	6.63049	6.56	68.8	1	K.TVSVSEAIK.K
*	2016-11-16-hjk-Sharma-Shalini-SL3-wt.8200.8200.2	2.7405	0.4345	100	1061.62	1061.62	-1.8	7446522	1	8.84255	8.8	61.1	2	K.TVSVSEAIKK.N
*	2016-11-16-hjk-Sharma-Shalini-SL3-wt.29241.29241.2	5.3443	0.6349	100	2253.25	2253.25	-1.5	630037	1	15.8609	4.46	58.8	2	R.LLEAQIASGGVVDPVNSVFLPK.D
*	2016-11-16-hjk-Sharma-Shalini-SL3-wt.15428.15428.2	1.9751	0.2254	99.5	1120.61	1120.61	-0.2	8704710	1	5.80301	6.56	71.4	1	R.GLIDRDLYR.S
*	2016-11-16-hjk-Sharma-Shalini-SL3-wt.9195.9195.2	2.243	0.3907	100	964.582	964.583	-1.1	9316819	1	7.90309	9.68	78.6	1	K.KVSYVQLK.E
*	2016-11-16-hjk-Sharma-Shalini-SL3-wt.12830.12830.2	1.8618	0.4452	99.9	836.487	836.488	-0.8	9538978	1	8.16079	8.8	72.7	1	K.VSYVQLK.E
*	2016-11-16-hjk-Sharma-Shalini-SL3-wt.20232.20232.3	5.0125	0.5601	100	1864.05	1864.05	-0.9	4932121	1	10.4461	8.23	55.3	1	R.CRIEPHTGLLLLSVQK.R
*	2016-11-16-hjk-Sharma-Shalini-SL3-wt.22360.22360.2	3.1262	0.5585	100	1547.91	1547.92	-1.4	1.76885e+06	1	8.69461	7.33	64	1	R.IEPHTGLLLLSVQK.R
*	2016-11-16-hjk-Sharma-Shalini-SL3-wt.22550.22550.3	2.7194	0.4158	100	1547.91	1547.92	-0.3	519814	1	7.63286	7.33	37.2	3	R.IEPHTGLLLLSVQK.R
*	2016-11-16-hjk-Sharma-Shalini-SL3-wt.15920.15920.2	1.6815	0.5462	100	925.456	925.456	-0.5	10065958	1	10.1955	10.06	69.2	1	R.SMSFQGIR.Q
*	2016-11-16-hjk-Sharma-Shalini-SL3-wt.26158.26158.2	5.8706	0.6756	100	2003.93	2003.94	-3.8	8822960	1	16.3984	4.46	82.8	1	K.DFLQGSSCIAGIYNETTK.Q
*	2016-11-16-hjk-Sharma-Shalini-SL3-wt.17308.17308.2	1.9916	0.4863	100	924.486	924.486	-0.1	11038918	1	8.314	6.56	64.3	1	K.LGIYEAMK.I
*	2016-11-16-hjk-Sharma-Shalini-SL3-wt.17431.17431.2	2.5572	0.5275	100	1018.6	1018.6	0.3	3.06348e+06	1	7.27743	9.08	93.8	1	K.RGLVGIEFK.E
*	2016-11-16-hjk-Sharma-Shalini-SL3-wt.23244.23244.2	4.4842	0.583	100	1538.88	1538.88	0.3	2.5329e+06	1	11.3742	4.46	76.9	2	R.LLEAQIATGGIIDPK.E
*	2016-11-16-hjk-Sharma-Shalini-SL3-wt.13954.13954.2	3.395	0.4429	100	1427.77	1427.76	1.3	3.79845e+06	1	7.77687	7.33	68.2	1	K.ESHRLPVDIAYK.R
*	2016-11-16-hjk-Sharma-Shalini-SL3-wt.13935.13935.3	3.6149	0.4924	100	1427.77	1427.76	1.2	16442414	1	9.12235	7.33	51.3	1	K.ESHRLPVDIAYK.R
*	2016-11-16-hjk-Sharma-Shalini-SL3-wt.27124.27124.2	5.3117	0.6502	100	2315.07	2315.07	-0.1	1.2352e+06	1	15.4324	4.12	51.4	1	K.RGYFNEELSEILSDPSDDTK.G
*	2016-11-16-hjk-Sharma-Shalini-SL3-wt.27098.27098.3	4.7478	0.6526	100	2315.07	2315.07	0.8	2931724	1	14.8319	4.12	49.2	2	K.RGYFNEELSEILSDPSDDTK.G
*	2016-11-16-hjk-Sharma-Shalini-SL3-wt.28799.28799.2	5.6828	0.7774	100	2028.99	2028.99	0.8	8874203	1	20.9701	4.14	85.2	1	K.GFFDPNTEENLTYLQLK.E
*	2016-11-16-hjk-Sharma-Shalini-SL3-wt.23734.23734.2	3.6251	0.4271	100	1788.92	1788.92	-1.8	2.30343e+06	1	7.49098	4.72	80	1	R.CIKDEETGLCLLPLK.E
*	2016-11-16-hjk-Sharma-Shalini-SL3-wt.23696.23696.3	3.0183	0.5768	100	1788.92	1788.92	-0.1	1.30209e+06	1	9.00844	4.72	41.7	1	R.CIKDEETGLCLLPLK.E
*	2016-11-16-hjk-Sharma-Shalini-SL3-wt.26847.26847.2	2.8921	0.5368	100	1387.71	1387.71	-0.1	2357296	1	9.27271	4.14	85	1	K.DEETGLCLLPLK.E
*	2016-11-16-hjk-Sharma-Shalini-SL3-wt.10102.10102.2	2.676	0.3442	99.9	1269.71	1269.72	-2.2	2.35768e+06	1	6.50313	6.56	70	1	R.RVVIVDPETNK.E
*	2016-11-16-hjk-Sharma-Shalini-SL3-wt.12390.12390.2	2.4647	0.5976	100	1113.61	1113.62	-1.3	4941065	1	12.469	4.46	58.8	2	R.VVIVDPETNK.E
*	2016-11-16-hjk-Sharma-Shalini-SL3-wt.10958.10958.2	1.7977	0.2679	99.3	1084.5	1084.5	-0.6	5851886	1	9.11107	4.46	43.8	1	K.EMSVQEAYK.K
*	2016-11-16-hjk-Sharma-Shalini-SL3-wt.7816.7816.2	3.0062	0.5	100	1212.59	1212.59	-0.4	3.98489e+06	1	9.35459	6.56	66.7	1	K.EMSVQEAYKK.G
*	2016-11-16-hjk-Sharma-Shalini-SL3-wt.21736.21736.2	1.8241	0.5156	99.8	1085.55	1085.55	-2.9	4297557	1	9.26202	4.46	69.2	1	K.GLIDYETFK.E
*	2016-11-16-hjk-Sharma-Shalini-SL3-wt.5761.5761.2	1.7317	0.4301	99.8	828.53	828.53	-0.5	6559230	1	7.87176	9.08	72.7	1	R.VVLVDRK.T
*	2016-11-16-hjk-Sharma-Shalini-SL3-wt.14513.14513.2	7.152	0.6059	100	1581.77	1581.78	-5.2	4207949	1	11.7125	4.72	96.2	1	R.KTGSQYDIQDAIDK.G
*	2016-11-16-hjk-Sharma-Shalini-SL3-wt.14510.14510.3	3.5998	0.5178	100	1581.77	1581.78	-0.6	4.06354e+06	1	10.1584	4.72	50	1	R.KTGSQYDIQDAIDK.G
*	2016-11-16-hjk-Sharma-Shalini-SL3-wt.17465.17465.2	4.2785	0.6135	100	1453.68	1453.68	-1.5	40261964	1	12.3348	4.14	66.7	2	K.TGSQYDIQDAIDK.G
*	2016-11-16-hjk-Sharma-Shalini-SL3-wt.15086.15086.2	1.3741	0.4365	99.3	875.403	875.405	-1.3	5.69271e+06	1	7.7963	6.56	60	1	K.FFDQYR.S
*	2016-11-16-hjk-Sharma-Shalini-SL3-wt.18864.18864.2	6.4602	0.8413	100	2119.92	2119.92	0.8	1.18918e+06	1	25.326	4.46	55.3	1	K.NGVGTSSSMGSGVSDDVFSSSR.H
*	2016-11-16-hjk-Sharma-Shalini-SL3-wt.9040.9040.2	1.8073	0.3184	99.5	862.498	862.499	-1.1	4.76856e+06	1	7.42936	10.06	57.1	1	K.ISTISSVR.N
*	2016-11-16-hjk-Sharma-Shalini-SL3-wt.16206.16206.2	2.1762	0.3796	99.9	1017.56	1017.56	-0.5	7.69774e+06	1	8.39187	4.46	50	1	K.ISITEGIER.G
*	2016-11-16-hjk-Sharma-Shalini-SL3-wt.16999.16999.2	2.2095	0.6695	100	1045.56	1045.56	-0.6	16310787	1	11.9682	6.56	52.9	2	R.GIVDSITGQR.L
*	2016-11-16-hjk-Sharma-Shalini-SL3-wt.15327.15327.2	5.5377	0.6408	100	1996.03	1995.03	-4.4	2125375	1	14.1018	7.11	70	1	R.LLEAQACTGGIIHPTTGQK.L
*	2016-11-16-hjk-Sharma-Shalini-SL3-wt.15384.15384.3	5.3939	0.5622	100	1995.03	1995.03	-1	3444986	1	10.4447	7.11	40.3	2	R.LLEAQACTGGIIHPTTGQK.L
*	2016-11-16-hjk-Sharma-Shalini-SL3-wt.25782.25782.2	6.4088	0.7066	100	2047.01	2047.01	-1.1	4.02368e+06	1	18.1628	4.14	80	1	K.LSLQDAVSQGVIDQDMATR.L
*	2016-11-16-hjk-Sharma-Shalini-SL3-wt.21435.21435.2	1.8571	0.3764	99.2	967.522	967.525	-3.3	10631128	1	7.75216	6.56	66.7	2	K.AFIGFEGVK.G
*	2016-11-16-hjk-Sharma-Shalini-SL3-wt.6083.6083.2	1.9772	0.3726	99.9	806.408	806.408	0.5	2.48789e+06	1	7.016	6.56	64.3	1	K.MSAAEAVK.E
*	2016-11-16-hjk-Sharma-Shalini-SL3-wt.6211.6211.2	1.9717	0.3647	99.8	1046.58	1046.58	-0.9	17477748	1	6.89813	6.56	60	1	R.ISTEEAIRK.G
*	2016-11-16-hjk-Sharma-Shalini-SL3-wt.5902.5902.2	2.346	0.3842	100	1012.5	1012.49	1.2	3.58658e+06	1	9.92843	6.56	66.7	1	R.LQDTSSYAK.I
*	2016-11-16-hjk-Sharma-Shalini-SL3-wt.21941.21941.2	2.0816	0.4861	100	1120.57	1120.57	-0.9	14518666	1	8.88197	4.46	64.7	1	R.SMVEDITGLR.L
*	2016-11-16-hjk-Sharma-Shalini-SL3-wt.9948.9948.2	2.537	0.5785	100	1004.56	1004.56	-1.2	14453134	1	11.4979	6.56	61.1	1	R.LLEAASVSSK.G
*	2016-11-16-hjk-Sharma-Shalini-SL3-wt.17351.17351.2	3.0433	0.7188	100	1520.72	1520.72	-0.6	5.38595e+06	1	18.1626	9.08	57.7	2	K.GLPSPYNMSSAPGSR.S
P09651	22	27	0.47	372	38747	9.1	U	0.00362713	1.95121	Heterogeneous nuclear ribonucleoprotein A1 OS=Homo sapiens GN=HNRNPA1 PE=1 SV=5	0	27	0
	2016-11-16-hjk-Sharma-Shalini-SL3-wt.4767.4767.2	2.4978	0.4742	100	1427.75	1427.75	-0.6	1.5206e+06	1	8.52908	6.56	66.7	1	K.SESPKEPEQLRK.L
	2016-11-16-hjk-Sharma-Shalini-SL3-wt.4721.4721.3	3.4963	0.3883	100	1427.75	1427.75	-1.2	2.2689e+06	1	7.38306	6.56	41.7	2	K.SESPKEPEQLRK.L
	2016-11-16-hjk-Sharma-Shalini-SL3-wt.28824.28824.2	4.7312	0.581	100	1784.9	1784.91	-0.9	4668256	1	12.9346	4.14	63.3	1	K.LFIGGLSFETTDESLR.S
	2016-11-16-hjk-Sharma-Shalini-SL3-wt.21881.21881.3	6.713	0.6876	100	2521.16	2521.16	-1.2	2655054	1	18.1943	5.8	43.3	1	R.SHFEQWGTLTDCVVMRDPNTK.R
	2016-11-16-hjk-Sharma-Shalini-SL3-wt.29297.29297.3	5.7248	0.6496	100	2510.21	2510.21	-2.6	1.79381e+06	1	15.4996	5.8	38.2	1	R.GFGFVTYATVEEVDAAMNARPHK.V
	2016-11-16-hjk-Sharma-Shalini-SL3-wt.29320.29320.4	2.2334	0.4004	99.7	2510.21	2510.21	-0.3	405500	1	7.26465	5.8	11.4	1	R.GFGFVTYATVEEVDAAMNARPHK.V
	2016-11-16-hjk-Sharma-Shalini-SL3-wt.5434.5434.2	3.432	0.4779	100	1437.74	1437.74	-1.4	2909830	1	9.01628	7.33	50	1	R.EDSQRPGAHLTVK.K
	2016-11-16-hjk-Sharma-Shalini-SL3-wt.5417.5417.3	2.8421	0.369	99.9	1437.74	1437.74	-0.7	4255841	1	6.84707	7.33	39.5	1	R.EDSQRPGAHLTVK.K
	2016-11-16-hjk-Sharma-Shalini-SL3-wt.4112.4112.3	4.1527	0.4092	100	1565.84	1565.84	-0.7	2.8318e+06	1	7.13053	8.8	45.5	1	R.EDSQRPGAHLTVKK.I
	2016-11-16-hjk-Sharma-Shalini-SL3-wt.2650.2650.2	2.1393	0.5603	100	1165.52	1165.52	-2.1	628046	1	11.3725	4.84	71.4	1	K.EDTEEHHLR.D
	2016-11-16-hjk-Sharma-Shalini-SL3-wt.18588.18588.3	5.2162	0.5693	100	2195.95	2195.96	-4.3	8.03582e+06	1	10.9528	4.7	48	1	K.EDTEEHHLRDYFEQYGK.I
	2016-11-16-hjk-Sharma-Shalini-SL3-wt.15871.15871.2	1.4489	0.584	99.9	1049.46	1049.46	-0.8	3.20421e+06	1	8.51871	4.46	50	1	R.DYFEQYGK.I
	2016-11-16-hjk-Sharma-Shalini-SL3-wt.24845.24845.2	3.0533	0.5387	100	1218.64	1218.64	-1.1	6577605	1	10.3618	4.14	72.2	2	K.IEVIEIMTDR.G
	2016-11-16-hjk-Sharma-Shalini-SL3-wt.20632.20632.3	5.3287	0.6098	100	1855.86	1855.86	-1.6	2.57828e+06	1	13.4839	4.89	50.9	2	K.RGFAFVTFDDHDSVDK.I
	2016-11-16-hjk-Sharma-Shalini-SL3-wt.23375.23375.2	4.3396	0.6414	100	1699.76	1699.76	-1.4	3.63507e+06	1	11.3859	4.4	68	1	R.GFAFVTFDDHDSVDK.I
	2016-11-16-hjk-Sharma-Shalini-SL3-wt.3934.3934.2	2.7278	0.5039	100	1485.66	1485.67	-1.5	580590	1	10.5239	7.38	52.6	1	K.YHTVNGHNCEVR.K
	2016-11-16-hjk-Sharma-Shalini-SL3-wt.3906.3906.3	3.5708	0.6387	100	1485.66	1485.67	-0.6	1.69149e+06	1	11.1543	7.38	47.5	1	K.YHTVNGHNCEVR.K
	2016-11-16-hjk-Sharma-Shalini-SL3-wt.2849.2849.2	1.689	0.3668	99.6	1613.76	1613.76	-0.1	231357	1	9.56205	8.23	16.7	1	K.YHTVNGHNCEVRK.A
	2016-11-16-hjk-Sharma-Shalini-SL3-wt.2836.2836.3	2.456	0.4731	99.9	1613.76	1613.76	-1.1	1.06537e+06	1	9.73015	8.23	37.5	1	K.YHTVNGHNCEVRK.A
	2016-11-16-hjk-Sharma-Shalini-SL3-wt.13896.13896.2	2.8466	0.6221	100	1375.63	1375.63	-0.9	12678955	1	11.0479	8.64	50	2	R.SSGPYGGGGQYFAK.P
*	2016-11-16-hjk-Sharma-Shalini-SL3-wt.5892.5892.2	5.2774	0.7807	100	1694.7	1694.7	0.4	1.24256e+06	1	19.4062	8.8	71	2	R.NQGGYGGSSSSSSYGSGR.R
*	2016-11-16-hjk-Sharma-Shalini-SL3-wt.4779.4779.3	2.3233	0.5015	99.7	1850.8	1850.8	-1.5	2.02689e+06	1	7.24339	10.01	24.6	1	R.NQGGYGGSSSSSSYGSGRR.F
P40926	14	19	0.47	338	35503	8.7	U	0.00280918	1.95121	Malate dehydrogenase, mitochondrial OS=Homo sapiens GN=MDH2 PE=1 SV=3	0	19	0
*	2016-11-16-hjk-Sharma-Shalini-SL3-wt.27099.27099.3	4.6944	0.5848	100	2366.24	2365.24	-1.7	3.60857e+06	1	10.3651	5.52	39.7	1	R.LTLYDIAHTPGVAADLSHIETK.A
*	2016-11-16-hjk-Sharma-Shalini-SL3-wt.27078.27078.4	2.5516	0.3831	99.3	2365.24	2365.24	1.8	297324	1	6.47343	5.52	11.8	1	R.LTLYDIAHTPGVAADLSHIETK.A
*	2016-11-16-hjk-Sharma-Shalini-SL3-wt.22257.22257.2	3.1499	0.5872	100	1489.73	1489.74	-0.7	1.70838e+06	1	11.4532	4.46	57.1	2	K.GYLGPEQLPDCLK.G
*	2016-11-16-hjk-Sharma-Shalini-SL3-wt.20767.20767.2	3.5105	0.6131	100	1338.71	1338.72	-3.7	3520411	1	12.3341	6.56	76.2	1	K.GCDVVVIPAGVPR.K
*	2016-11-16-hjk-Sharma-Shalini-SL3-wt.17381.17381.2	2.3766	0.5158	100	992.54	992.541	-1.4	2929078	1	8.04135	6.56	60	1	R.ANTFVAELK.G
*	2016-11-16-hjk-Sharma-Shalini-SL3-wt.22825.22825.2	2.5526	0.4617	100	1370.77	1370.77	-0.3	3345198	1	11.0286	8.26	65	2	K.TIIPLISQCTPK.V
*	2016-11-16-hjk-Sharma-Shalini-SL3-wt.25168.25168.2	2.984	0.5262	100	1560.8	1560.8	-1.3	1.57314e+06	1	9.96471	4.46	56.5	3	K.VDFPQDQLTALTGR.I
*	2016-11-16-hjk-Sharma-Shalini-SL3-wt.7868.7868.2	2.1295	0.2375	99.4	1073.58	1073.58	-1.1	2.88112e+06	1	4.9176	4.46	66.7	1	R.IQEAGTEVVK.A
*	2016-11-16-hjk-Sharma-Shalini-SL3-wt.16892.16892.2	4.3882	0.6952	100	1454.71	1454.71	-0.2	2.5988e+06	1	16.0956	9.08	69.2	1	K.AGAGSATLSMAYAGAR.F
*	2016-11-16-hjk-Sharma-Shalini-SL3-wt.28713.28713.2	3.0959	0.6093	100	1327.67	1327.67	0	1535980	1	14.6467	6.56	66.7	1	R.FVFSLVDAMNGK.E
*	2016-11-16-hjk-Sharma-Shalini-SL3-wt.15466.15466.2	2.9279	0.5903	100	1153.56	1153.56	-0.4	5737372	1	12.0801	4.46	61.1	1	K.EGVVECSFVK.S
*	2016-11-16-hjk-Sharma-Shalini-SL3-wt.27045.27045.2	4.969	0.6593	100	1973.95	1973.95	0.2	1.14855e+06	1	15.3892	4.46	67.9	2	K.SQETECTYFSTPLLLGK.K
*	2016-11-16-hjk-Sharma-Shalini-SL3-wt.23634.23634.3	3.0432	0.4994	100	2103.05	2102.05	-1.2	816368	1	7.82551	6.56	25	1	K.SQETECTYFSTPLLLGKK.G
*	2016-11-16-hjk-Sharma-Shalini-SL3-wt.21422.21422.2	1.6752	0.358	99.5	1116.6	1116.6	-0.4	2.80533e+06	1	6.97299	4.46	55.6	1	K.MISDAIPELK.A
P22626	19	21	0.467	353	37430	8.9	U	0.00297294	1.93089	Heterogeneous nuclear ribonucleoproteins A2/B1 OS=Homo sapiens GN=HNRNPA2B1 PE=1 SV=2	0	21	0
*	2016-11-16-hjk-Sharma-Shalini-SL3-wt.15365.15365.2	2.1469	0.4263	99.9	1057.59	1057.59	-2.1	3.00575e+06	1	8.98285	4.46	75	1	K.TLETVPLER.K
*	2016-11-16-hjk-Sharma-Shalini-SL3-wt.29129.29129.2	4.1268	0.6242	100	1798.92	1798.92	0.3	681620	1	11.2031	4.14	51.9	1	K.LFIGGLSFETTEESLR.N
*	2016-11-16-hjk-Sharma-Shalini-SL3-wt.14860.14860.2	1.3607	0.4788	99.3	1087.48	1087.48	-1.5	6.28117e+06	1	7.75615	6.56	57.1	1	R.NYYEQWGK.L
*	2016-11-16-hjk-Sharma-Shalini-SL3-wt.12080.12080.3	2.5847	0.3979	99.9	1491.73	1491.73	-1	1.41665e+06	1	6.2078	6.56	28.6	1	K.LTDCVVMRDPASK.R
*	2016-11-16-hjk-Sharma-Shalini-SL3-wt.3436.3436.2	3.0081	0.4982	100	1338.7	1338.7	-0.3	1.37356e+06	1	9.13926	7.33	73.9	1	R.EESGKPGAHVTVK.K
*	2016-11-16-hjk-Sharma-Shalini-SL3-wt.3435.3435.3	2.4783	0.2841	99.8	1338.7	1338.7	0.2	6898476	1	6.77739	7.33	34.8	1	R.EESGKPGAHVTVK.K
	2016-11-16-hjk-Sharma-Shalini-SL3-wt.2650.2650.2	2.1393	0.5603	100	1165.52	1165.52	-2.1	628046	1	11.3725	4.84	71.4	1	K.EDTEEHHLR.D
*	2016-11-16-hjk-Sharma-Shalini-SL3-wt.18910.18910.3	5.2884	0.7341	100	2196.94	2196.95	-2.8	8697882	1	11.2857	4.53	53.1	1	K.EDTEEHHLRDYFEEYGK.I
*	2016-11-16-hjk-Sharma-Shalini-SL3-wt.18912.18912.4	3.3259	0.4431	99.9	2196.94	2196.95	-2.3	2435364	1	5.75549	4.53	16.1	1	K.EDTEEHHLRDYFEEYGK.I
*	2016-11-16-hjk-Sharma-Shalini-SL3-wt.22589.22589.2	3.0823	0.4863	100	1188.64	1188.65	-2	2.00001e+06	1	9.59686	4.14	61.1	2	K.IDTIEIITDR.Q
*	2016-11-16-hjk-Sharma-Shalini-SL3-wt.21058.21058.3	6.0164	0.5902	100	1851.87	1851.87	0.3	5.00261e+06	1	14.655	4.89	50	1	K.RGFGFVTFDDHDPVDK.I
*	2016-11-16-hjk-Sharma-Shalini-SL3-wt.23678.23678.2	5.072	0.6287	100	1695.76	1695.76	-1.4	2106256	1	12.852	4.4	69.2	1	R.GFGFVTFDDHDPVDK.I
*	2016-11-16-hjk-Sharma-Shalini-SL3-wt.23665.23665.3	3.1175	0.5744	100	1695.76	1695.76	-0.5	1.61578e+06	1	10.9378	4.4	35.8	2	R.GFGFVTFDDHDPVDK.I
*	2016-11-16-hjk-Sharma-Shalini-SL3-wt.4956.4956.2	2.6012	0.5214	100	1410.69	1410.69	-0.7	970729	1	10.3355	7.41	55	1	K.YHTINGHNAEVR.K
*	2016-11-16-hjk-Sharma-Shalini-SL3-wt.4922.4922.3	2.8663	0.4482	100	1410.69	1410.69	-1	2518779	1	9.7724	7.41	39	1	K.YHTINGHNAEVR.K
*	2016-11-16-hjk-Sharma-Shalini-SL3-wt.3779.3779.3	2.7648	0.5584	100	1538.78	1538.78	-0.7	2.73419e+06	1	11.2389	8.8	47.8	1	K.YHTINGHNAEVRK.A
*	2016-11-16-hjk-Sharma-Shalini-SL3-wt.13623.13623.2	1.9832	0.3037	99.3	1013.44	1013.44	-2	3.4359e+06	1	6.93705	6.56	58.8	1	R.GGNFGFGDSR.G
*	2016-11-16-hjk-Sharma-Shalini-SL3-wt.13768.13768.2	3.6848	0.5959	100	1377.63	1377.63	-2.1	3315880	1	12.1863	10.06	73.9	1	R.GGGGNFGPGPGSNFR.G
*	2016-11-16-hjk-Sharma-Shalini-SL3-wt.13999.13999.2	6.6846	0.8193	100	2189.91	2189.91	-0.1	2.01967e+06	1	19.9572	8.64	69	1	R.NMGGPYGGGNYGPGGSGGSGGYGGR.S
P14923	36	52	0.464	745	81745	6.1	U	0.0034881	1.91072	Junction plakoglobin OS=Homo sapiens GN=JUP PE=1 SV=3	0	52	0
*	2016-11-16-hjk-Sharma-Shalini-SL3-wt.19382.19382.3	5.0068	0.6535	100	3103.41	3102.41	-1.4	1.68292e+06	1	12.2356	5.63	29.8	1	K.VTEWQQTYTYDSGIHSGANTCVPSVSSK.G
*	2016-11-16-hjk-Sharma-Shalini-SL3-wt.10321.10321.2	2.6575	0.6869	100	1266.51	1266.51	-0.7	2.50752e+06	1	9.73974	3.96	66.7	1	K.GIMEEDEACGR.Q
*	2016-11-16-hjk-Sharma-Shalini-SL3-wt.17412.17412.2	2.3323	0.2297	99.7	998.587	998.588	-0.9	17078564	1	7.76789	6.56	68.8	1	R.LAEPSQLLK.S
*	2016-11-16-hjk-Sharma-Shalini-SL3-wt.22030.22030.2	5.2124	0.4169	100	2029.03	2029.03	-3.1	10603160	1	14.3149	4.72	76.7	1	K.SAIVHLINYQDDAELATR.A
*	2016-11-16-hjk-Sharma-Shalini-SL3-wt.16804.16804.2	3.1119	0.4861	100	1341.73	1341.73	-0.4	51553356	1	9.44897	4.14	59.1	1	K.LLNDEDPVVVTK.A
*	2016-11-16-hjk-Sharma-Shalini-SL3-wt.15527.15527.2	2.0014	0.4983	100	1074.6	1074.6	-0.7	4871769	1	7.07266	9.08	62.5	1	K.AAMIVNQLSK.K
*	2016-11-16-hjk-Sharma-Shalini-SL3-wt.11920.11920.2	2.5691	0.4918	100	1202.69	1202.69	-2	2.36789e+06	1	9.4515	10.04	63.2	1	K.AAMIVNQLSKK.E
*	2016-11-16-hjk-Sharma-Shalini-SL3-wt.21322.21322.3	3.5745	0.4936	100	1567.91	1567.91	-0.8	2544354	1	9.2076	12	54.5	1	R.RALMGSPQLVAAVVR.T
*	2016-11-16-hjk-Sharma-Shalini-SL3-wt.25142.25142.2	3.2713	0.5882	100	1411.81	1411.81	0.1	8803690	1	12.7211	10.06	66.7	2	R.ALMGSPQLVAAVVR.T
*	2016-11-16-hjk-Sharma-Shalini-SL3-wt.8570.8570.2	3.1481	0.6728	100	1352.61	1352.61	-1.8	1.4534e+06	1	14.3017	4.46	63.6	2	R.TMQNTSDLDTAR.C
*	2016-11-16-hjk-Sharma-Shalini-SL3-wt.9511.9511.3	3.9251	0.6059	100	1575.78	1575.78	-2.3	4.15596e+06	1	9.86336	8.29	50	1	R.CTTSILHNLSHHR.E
	2016-11-16-hjk-Sharma-Shalini-SL3-wt.27485.27485.2	2.0287	0.4724	100	890.536	890.535	1.2	1.27425e+06	1	10.148	6.56	57.1	2	R.EGLLAIFK.S
*	2016-11-16-hjk-Sharma-Shalini-SL3-wt.16458.16458.2	2.0787	0.4251	99.9	869.519	869.52	-1.6	2.55448e+06	1	11.4358	10.06	73.3	2	K.SGGIPALVR.M
	2016-11-16-hjk-Sharma-Shalini-SL3-wt.23451.23451.2	2.9796	0.4972	100	1302.7	1302.7	0.8	6.42229e+06	1	11.2029	8.26	61.1	2	R.LVQNCLWTLR.N
*	2016-11-16-hjk-Sharma-Shalini-SL3-wt.17662.17662.2	2.5206	0.4692	100	1002.55	1002.55	-0.4	10748730	1	7.47024	4.46	62.5	2	K.QEGLESVLK.I
*	2016-11-16-hjk-Sharma-Shalini-SL3-wt.15901.15901.2	5.0239	0.631	100	1730.83	1730.84	-2.4	3935493	1	10.4502	4.4	74.1	1	R.AGDKDDITEPAVCALR.H
*	2016-11-16-hjk-Sharma-Shalini-SL3-wt.15893.15893.3	2.6871	0.3657	99.9	1730.84	1730.84	0.7	9037585	1	8.01984	4.4	28.6	1	R.AGDKDDITEPAVCALR.H
*	2016-11-16-hjk-Sharma-Shalini-SL3-wt.5831.5831.2	3.0737	0.3378	100	1368.63	1368.63	-1	3.32118e+06	1	13.0159	5.63	77.3	2	R.HPEAEMAQNSVR.L
*	2016-11-16-hjk-Sharma-Shalini-SL3-wt.5863.5863.3	2.5162	0.4477	100	1368.63	1368.63	-0.1	2361460	1	8.63275	5.63	30.8	1	R.HPEAEMAQNSVR.L
*	2016-11-16-hjk-Sharma-Shalini-SL3-wt.22694.22694.2	2.0242	0.388	99.9	1087.65	1087.65	-0.6	4962278	1	7.561	8.8	61.1	2	R.LNYGIPAIVK.L
*	2016-11-16-hjk-Sharma-Shalini-SL3-wt.23200.23200.2	3.1684	0.475	100	1449.82	1449.82	-0.7	11445251	1	9.01725	9.08	63.6	3	K.LLNQPNQWPLVK.A
*	2016-11-16-hjk-Sharma-Shalini-SL3-wt.21351.21351.2	4.9882	0.6914	100	2155.14	2155.14	0.2	1.95627e+06	1	14.7283	7.11	52.9	1	R.NLALCPANHAPLQEAAVIPR.L
*	2016-11-16-hjk-Sharma-Shalini-SL3-wt.21331.21331.3	5.043	0.6891	100	2155.14	2155.14	-1.2	9991695	1	13.4016	7.11	40	1	R.NLALCPANHAPLQEAAVIPR.L
*	2016-11-16-hjk-Sharma-Shalini-SL3-wt.18777.18777.2	2.0639	0.221	99.7	812.561	812.56	0.3	1.26639e+06	1	4.4864	9.08	75	2	R.LVQLLVK.A
*	2016-11-16-hjk-Sharma-Shalini-SL3-wt.7570.7570.2	4.922	0.5927	100	1599.79	1599.79	-1	2.32641e+06	1	18.7819	7.33	75	2	R.HVAAGTQQPYTDGVR.M
*	2016-11-16-hjk-Sharma-Shalini-SL3-wt.7603.7603.3	3.625	0.6092	100	1599.79	1599.79	-0.4	18580438	1	10.8616	7.33	31.5	1	R.HVAAGTQQPYTDGVR.M
	2016-11-16-hjk-Sharma-Shalini-SL3-wt.23005.23005.2	4.9976	0.5101	100	1899.95	1898.95	-2	2.39319e+06	1	11.8548	4.72	64.3	1	R.MEEIVEGCTGALHILAR.D
	2016-11-16-hjk-Sharma-Shalini-SL3-wt.22982.22982.3	4.5498	0.55	100	1898.94	1898.95	-1.2	2.95532e+06	1	11.7372	4.72	42.6	1	R.MEEIVEGCTGALHILAR.D
	2016-11-16-hjk-Sharma-Shalini-SL3-wt.21669.21669.2	4.0717	0.6429	100	1373.71	1373.71	-0.9	9752788	1	14.6148	4.46	73.9	1	R.VAAGVLCELAQDK.E
*	2016-11-16-hjk-Sharma-Shalini-SL3-wt.29165.29165.2	4.3528	0.6067	100	2267.09	2267.1	-1.7	269755	1	17.9461	4.25	40.6	2	K.EAADAIDAEGASAPLMELLHSR.N
*	2016-11-16-hjk-Sharma-Shalini-SL3-wt.29202.29202.3	5.9707	0.5342	100	2267.09	2267.1	-1	11496933	1	14.674	4.25	46.3	2	K.EAADAIDAEGASAPLMELLHSR.N
*	2016-11-16-hjk-Sharma-Shalini-SL3-wt.25158.25158.2	4.4598	0.6343	100	1483.75	1483.75	-0.2	8608759	1	15.9173	6.56	65.4	2	R.NEGTATYAAAVLFR.I
*	2016-11-16-hjk-Sharma-Shalini-SL3-wt.4857.4857.3	2.3864	0.3897	99.9	1236.59	1236.59	0.8	1.32562e+06	1	7.92203	4.72	53.3	1	R.ISEDKNPDYR.K
*	2016-11-16-hjk-Sharma-Shalini-SL3-wt.3578.3578.3	2.2265	0.3911	99.9	1364.68	1364.68	-0.3	551304	1	5.97035	6.56	40	1	R.ISEDKNPDYRK.R
*	2016-11-16-hjk-Sharma-Shalini-SL3-wt.20942.20942.2	2.8878	0.458	100	1392.78	1392.78	-1.1	4.86024e+06	1	7.21913	9.08	54.5	1	K.RVSVELTNSLFK.H
*	2016-11-16-hjk-Sharma-Shalini-SL3-wt.24052.24052.2	3.5272	0.5755	100	1236.68	1236.68	0.2	2.57217e+06	1	11.0005	6.56	68.4	2	R.VSVELTNSLFK.H
P07355	23	35	0.457	339	38604	7.8	U	0.00515953	1.86418	Annexin A2 OS=Homo sapiens GN=ANXA2 PE=1 SV=2	0	35	0
	2016-11-16-hjk-Sharma-Shalini-SL3-wt.14419.14419.3	4.5424	0.5514	100	1844.9	1844.9	-1.7	7.88291e+06	1	11.5025	5.63	39.7	2	K.LSLEGDHSTPPSAYGSVK.A
	2016-11-16-hjk-Sharma-Shalini-SL3-wt.11361.11361.2	2.0512	0.6918	100	1086.48	1086.49	-0.3	10841823	1	12.3661	4.46	66.7	1	K.AYTNFDAER.D
	2016-11-16-hjk-Sharma-Shalini-SL3-wt.25222.25222.2	6.1783	0.4968	100	2155.07	2155.07	2.3	3.53417e+06	1	11.8222	4.4	61.8	1	K.AYTNFDAERDALNIETAIK.T
	2016-11-16-hjk-Sharma-Shalini-SL3-wt.25210.25210.3	2.9732	0.3767	100	2155.07	2155.07	0	3.20073e+06	1	8.99546	4.4	22.4	2	K.AYTNFDAERDALNIETAIK.T
	2016-11-16-hjk-Sharma-Shalini-SL3-wt.20514.20514.2	2.7314	0.3609	100	1087.6	1087.6	-0.2	2389730	1	8.79947	4.46	66.7	1	R.DALNIETAIK.T
*	2016-11-16-hjk-Sharma-Shalini-SL3-wt.13243.13243.3	2.8299	0.5366	99.9	1667.82	1667.82	-2.9	1.8774e+06	1	9.26638	9.08	35.7	1	R.SNAQRQDIAFAYQR.R
*	2016-11-16-hjk-Sharma-Shalini-SL3-wt.16115.16115.2	2.5841	0.481	100	1111.55	1111.55	-0.2	57201364	1	11.264	6.56	68.8	2	R.QDIAFAYQR.R
	2016-11-16-hjk-Sharma-Shalini-SL3-wt.11208.11208.2	4.2375	0.5835	100	1222.59	1222.6	-0.2	2.90154e+06	1	14.787	4.46	100	2	K.TPAQYDASELK.A
	2016-11-16-hjk-Sharma-Shalini-SL3-wt.10381.10381.2	3.1099	0.531	100	1244.62	1244.62	-0.5	21722004	1	11.8244	4.46	66.7	1	R.TNQELQEINR.V
	2016-11-16-hjk-Sharma-Shalini-SL3-wt.20109.20109.2	2.4702	0.6863	100	1225.57	1225.57	0.8	3.72302e+06	1	16.4372	4.14	61.1	1	K.DIISDTSGDFR.K
	2016-11-16-hjk-Sharma-Shalini-SL3-wt.16608.16608.2	3.1266	0.5102	100	1353.66	1353.66	-3.9	5.48314e+06	1	10.9917	4.72	75	2	K.DIISDTSGDFRK.L
*	2016-11-16-hjk-Sharma-Shalini-SL3-wt.21308.21308.2	4.8317	0.6442	100	2064.98	2064.98	-1.8	5.41952e+06	1	11.6082	4.12	67.7	1	R.RAEDGSVIDYELIDQDAR.D
*	2016-11-16-hjk-Sharma-Shalini-SL3-wt.21304.21304.3	4.2759	0.5828	100	2064.98	2064.98	-0.7	9380251	1	10.1242	4.12	40.7	2	R.RAEDGSVIDYELIDQDAR.D
*	2016-11-16-hjk-Sharma-Shalini-SL3-wt.28451.28451.3	4.6169	0.524	100	2926.41	2926.41	2.6	1.52995e+06	1	9.33485	4.19	24	1	R.RAEDGSVIDYELIDQDARDLYDAGVK.R
*	2016-11-16-hjk-Sharma-Shalini-SL3-wt.23741.23741.2	5.8317	0.6385	100	1908.87	1908.88	-4	12020766	1	15.4388	3.8	85.7	3	R.AEDGSVIDYELIDQDAR.D
*	2016-11-16-hjk-Sharma-Shalini-SL3-wt.9158.9158.2	1.6936	0.3685	99.5	1036.54	1036.54	-0.9	5.25577e+06	1	7.63626	6.56	71.4	1	R.DLYDAGVKR.K
	2016-11-16-hjk-Sharma-Shalini-SL3-wt.21777.21777.2	2.3398	0.4461	100	1035.53	1035.53	-1.4	2.8975e+06	1	7.90626	6.56	71.4	2	K.WISIMTER.S
	2016-11-16-hjk-Sharma-Shalini-SL3-wt.27785.27785.2	2.7801	0.6757	100	1460.67	1460.67	-4.6	2.51661e+06	1	13.7446	4.46	63.2	2	K.SYSPYDMLESIR.K
	2016-11-16-hjk-Sharma-Shalini-SL3-wt.24649.24649.2	3.0689	0.6379	100	1588.77	1588.77	-1.3	3.51065e+06	1	14.9542	6.56	61.9	2	K.SYSPYDMLESIRK.E
	2016-11-16-hjk-Sharma-Shalini-SL3-wt.24648.24648.3	2.4347	0.6419	100	1588.77	1588.77	-0.8	1.5783e+06	1	12.2237	6.56	30.8	2	K.SYSPYDMLESIRK.E
	2016-11-16-hjk-Sharma-Shalini-SL3-wt.12222.12222.2	1.6939	0.3595	99.4	821.409	821.407	1.6	2591005	1	6.31443	4.46	63.6	1	R.SEVDMLK.I
	2016-11-16-hjk-Sharma-Shalini-SL3-wt.20100.20100.2	5.6744	0.703	100	2012.96	2012.96	1.2	2.15797e+06	1	16.9966	6.56	72	1	K.SLYYYIQQDTKGDYQK.A
	2016-11-16-hjk-Sharma-Shalini-SL3-wt.20114.20114.3	2.7667	0.4179	100	2012.96	2012.96	0.1	2.97396e+06	1	7.44737	6.56	31.2	1	K.SLYYYIQQDTKGDYQK.A
P62241	10	10	0.457	208	24205	10.3	U	0.00240259	1.86418	40S ribosomal protein S8 OS=Homo sapiens GN=RPS8 PE=1 SV=2	0	10	0
*	2016-11-16-hjk-Sharma-Shalini-SL3-wt.5587.5587.3	2.5182	0.3451	99.9	1347.74	1347.74	-0.5	2.61052e+06	1	5.55816	9.68	37.5	1	R.KYELGRPAANTK.I
*	2016-11-16-hjk-Sharma-Shalini-SL3-wt.22247.22247.2	4.7159	0.6508	100	1718.91	1718.91	-0.4	3.54234e+06	1	12.1053	4.46	73.1	1	R.IIDVVYNASNNELVR.T
*	2016-11-16-hjk-Sharma-Shalini-SL3-wt.21429.21429.2	4.0466	0.6004	100	1619.79	1619.8	-3.2	2.42975e+06	1	13.2903	7.33	85.7	1	R.QWYESHYALPLGR.K
*	2016-11-16-hjk-Sharma-Shalini-SL3-wt.21413.21413.3	2.858	0.398	99.9	1619.79	1619.8	-1.6	3.8561e+06	1	9.38082	7.33	35.6	1	R.QWYESHYALPLGR.K
*	2016-11-16-hjk-Sharma-Shalini-SL3-wt.17318.17318.2	2.7978	0.5258	100	1314.68	1314.68	1.4	3.96316e+06	1	9.38982	3.96	66.7	1	K.LTPEEEEILNK.K
*	2016-11-16-hjk-Sharma-Shalini-SL3-wt.20617.20617.2	4.3868	0.4942	100	1506.78	1506.78	-0.2	3.05299e+06	1	10.5145	4.46	75	1	K.ISSLLEEQFQQGK.L
*	2016-11-16-hjk-Sharma-Shalini-SL3-wt.11858.11858.3	2.0202	0.4355	99.7	1558.79	1558.79	-0.7	3225217	1	7.16194	8.65	27	1	K.LLACIASRPGQCGR.A
*	2016-11-16-hjk-Sharma-Shalini-SL3-wt.11051.11051.2	2.3677	0.3633	100	951.479	951.478	0.6	1.3072e+06	1	8.96109	4.46	66.7	1	R.ADGYVLEGK.E
*	2016-11-16-hjk-Sharma-Shalini-SL3-wt.22938.22938.2	1.7524	0.266	99.5	969.504	969.504	0.1	1.96541e+06	1	7.59472	4.46	66.7	1	K.ELEFYLR.K
*	2016-11-16-hjk-Sharma-Shalini-SL3-wt.17700.17700.2	2.6463	0.4201	100	1097.6	1097.6	0.6	3.51273e+06	1	8.2318	6.56	78.6	1	K.ELEFYLRK.I
Q96FQ6	6	7	0.456	103	11801	6.8	U	0.00339628	1.85759	Protein S100-A16 OS=Homo sapiens GN=S100A16 PE=1 SV=1	0	7	0
*	2016-11-16-hjk-Sharma-Shalini-SL3-wt.27307.27307.2	3.2305	0.5075	100	1294.74	1294.74	-0.1	1.05258e+06	1	14.6427	6.56	76.5	2	K.AVIVLVENFYK.Y
*	2016-11-16-hjk-Sharma-Shalini-SL3-wt.10218.10218.2	2.9738	0.6042	100	1386.64	1386.64	-0.4	1.07733e+06	1	12.2047	5.63	65	1	K.ELNHMLSDTGNR.K
*	2016-11-16-hjk-Sharma-Shalini-SL3-wt.7299.7299.3	3.5781	0.5777	100	1514.74	1514.74	-0.8	4860069	1	11.7054	7.33	51.3	1	K.ELNHMLSDTGNRK.A
*	2016-11-16-hjk-Sharma-Shalini-SL3-wt.8670.8670.2	3.1488	0.5764	100	1365.69	1365.69	-0.8	2.00075e+06	1	11.3738	5.63	63.6	1	K.LIQNLDANHDGR.I
*	2016-11-16-hjk-Sharma-Shalini-SL3-wt.8643.8643.3	2.8063	0.5128	100	1365.69	1365.69	-0.6	2.35132e+06	1	9.02935	5.63	42.5	1	K.LIQNLDANHDGR.I
*	2016-11-16-hjk-Sharma-Shalini-SL3-wt.4425.4425.2	2.8914	0.5591	100	1285.6	1285.6	-0.8	1.22824e+06	1	11.2426	4.46	77.8	1	K.LIHEQEQQSSS.-
P13645	37	137	0.455	584	58827	5.2	U	0.0117233	1.85102	Keratin, type I cytoskeletal 10 OS=Homo sapiens GN=KRT10 PE=1 SV=6	0	137	0
*	2016-11-16-hjk-Sharma-Shalini-SL3-wt.7295.7295.2	5.8439	0.8005	100	1549.67	1549.68	-1.7	85634016	1	19.7098	8.26	84.8	1	R.SGGGGGGGGCGGGGGVSSLR.I
*	2016-11-16-hjk-Sharma-Shalini-SL3-wt.22798.22798.2	5.4152	0.7521	100	1707.77	1707.77	0.2	2.1136e+06	1	19.6594	10.06	75	49	K.GSLGGGFSSGGFSGGSFSR.G
*	2016-11-16-hjk-Sharma-Shalini-SL3-wt.23690.23690.2	7.1174	0.8108	100	2342.98	2342.98	-1.9	4.15278e+06	1	22.544	8.26	72.5	6	R.GSSGGGCFGGSSGGYGGLGGFGGGSFR.G
	2016-11-16-hjk-Sharma-Shalini-SL3-wt.10093.10093.2	2.5183	0.4443	100	1090.53	1090.53	-0.4	28081492	1	8.28659	6.56	60	2	K.VTMQNLNDR.L
	2016-11-16-hjk-Sharma-Shalini-SL3-wt.24561.24561.3	3.7045	0.4332	100	1880.95	1880.95	-0.3	2.7686e+06	1	7.08718	6.56	34.6	1	K.VTMQNLNDRLASYLDK.V
	2016-11-16-hjk-Sharma-Shalini-SL3-wt.10609.10609.2	2.1096	0.4285	100	809.44	809.44	-0.2	24963616	1	8.72025	6.56	75	2	R.LASYLDK.V
*	2016-11-16-hjk-Sharma-Shalini-SL3-wt.13182.13182.2	4.9859	0.4349	100	1637.82	1636.82	-2.3	5.00981e+06	1	9.0024	4.4	83.3	2	K.VRALEESNYELEGK.I
*	2016-11-16-hjk-Sharma-Shalini-SL3-wt.13171.13171.3	2.7073	0.4769	100	1636.82	1636.82	0.7	4.40528e+06	1	8.57492	4.4	36.6	2	K.VRALEESNYELEGK.I
*	2016-11-16-hjk-Sharma-Shalini-SL3-wt.14030.14030.2	3.4493	0.6103	100	1381.65	1381.65	-1.1	2.31773e+06	1	14.7851	3.96	63.2	4	R.ALEESNYELEGK.I
*	2016-11-16-hjk-Sharma-Shalini-SL3-wt.1516.1516.2	2.1039	0.652	100	1118.51	1118.51	-1.7	609268	1	15.5261	7.41	55.6	1	K.HGNSHQGEPR.D
	2016-11-16-hjk-Sharma-Shalini-SL3-wt.11725.11725.2	2.0668	0.4286	100	807.399	807.4	-0.3	32583916	1	11.6816	4.46	66.7	4	R.LAADDFR.L
*	2016-11-16-hjk-Sharma-Shalini-SL3-wt.12544.12544.2	2.5025	0.4896	100	1234.68	1234.68	-0.6	13238390	1	8.53002	6.56	66.7	2	R.LKYENEVALR.Q
*	2016-11-16-hjk-Sharma-Shalini-SL3-wt.12557.12557.3	2.1959	0.244	99.3	1234.68	1234.68	-0.4	38003200	1	6.6181	6.56	35.3	1	R.LKYENEVALR.Q
*	2016-11-16-hjk-Sharma-Shalini-SL3-wt.10759.10759.2	2.1139	0.5044	100	993.499	993.5	-1.2	23002760	1	11.9625	4.46	78.6	2	K.YENEVALR.Q
	2016-11-16-hjk-Sharma-Shalini-SL3-wt.17566.17566.2	3.3437	0.5133	100	1201.62	1201.62	1	7055657	1	9.72001	4.46	75	2	R.QSVEADINGLR.R
	2016-11-16-hjk-Sharma-Shalini-SL3-wt.14868.14868.2	2.9571	0.3933	100	1357.72	1357.72	-1.9	1149346180	1	7.35216	6.56	47.6	2	R.QSVEADINGLRR.V
	2016-11-16-hjk-Sharma-Shalini-SL3-wt.14857.14857.3	2.5511	0.3884	99.9	1357.72	1357.72	-1.1	169706432	1	6.68008	6.56	40	2	R.QSVEADINGLRR.V
*	2016-11-16-hjk-Sharma-Shalini-SL3-wt.16975.16975.2	3.3793	0.2895	100	1187.7	1187.7	-0.4	9629484	1	6.21636	6.56	83.3	2	R.RVLDELTLTK.A
*	2016-11-16-hjk-Sharma-Shalini-SL3-wt.18857.18857.2	2.3295	0.5433	100	1031.6	1031.6	-0.4	34987944	1	8.95818	4.46	66.7	4	R.VLDELTLTK.A
	2016-11-16-hjk-Sharma-Shalini-SL3-wt.1752.1752.2	2.1569	0.372	99.9	1044.48	1044.48	-0.6	1341834	1	9.75511	5.8	85.7	1	K.KNHEEEMK.D
	2016-11-16-hjk-Sharma-Shalini-SL3-wt.2153.2153.2	2.2364	0.3777	99.9	916.381	916.383	-1.8	2.36248e+06	1	5.13362	4.72	75	1	K.NHEEEMK.D
*	2016-11-16-hjk-Sharma-Shalini-SL3-wt.10535.10535.2	3.363	0.6284	100	1365.64	1365.64	-1.5	10170407	1	16.3435	4.46	82.4	1	R.SQYEQLAEQNR.K
*	2016-11-16-hjk-Sharma-Shalini-SL3-wt.7867.7867.2	3.7296	0.6378	100	1493.73	1493.73	-0.5	3044025	1	12.3364	6.56	84.2	3	R.SQYEQLAEQNRK.D
*	2016-11-16-hjk-Sharma-Shalini-SL3-wt.7497.7497.3	2.5537	0.3941	100	1493.73	1493.73	-0.2	2.75652e+06	1	8.89671	6.56	32.5	2	R.SQYEQLAEQNRK.D
	2016-11-16-hjk-Sharma-Shalini-SL3-wt.14598.14598.2	4.0537	0.5468	100	1237.59	1237.58	0.2	4.89351e+06	1	9.66655	4.72	100	1	R.KDAEAWFNEK.S
	2016-11-16-hjk-Sharma-Shalini-SL3-wt.19668.19668.2	2.3244	0.3605	100	1109.49	1109.49	-0.3	18675422	1	7.90676	4.14	68.8	4	K.DAEAWFNEK.S
*	2016-11-16-hjk-Sharma-Shalini-SL3-wt.25945.25945.2	6.2278	0.7157	100	1996.97	1996.97	-0.7	15788840	1	16.8473	3.96	80	10	K.ELTTEIDNNIEQISSYK.S
*	2016-11-16-hjk-Sharma-Shalini-SL3-wt.27267.27267.3	5.1811	0.6716	100	2981.5	2981.51	-0.9	8405362	1	11.2314	4.42	40	1	K.ELTTEIDNNIEQISSYKSEITELRR.N
*	2016-11-16-hjk-Sharma-Shalini-SL3-wt.27257.27257.4	4.9527	0.5238	100	2981.5	2981.51	-2.6	7572060	1	8.41899	4.42	20	2	K.ELTTEIDNNIEQISSYKSEITELRR.N
*	2016-11-16-hjk-Sharma-Shalini-SL3-wt.8107.8107.2	2.2675	0.3162	99.9	1003.55	1003.55	0.1	25520594	1	6.66235	6.56	91.7	1	K.SEITELRR.N
*	2016-11-16-hjk-Sharma-Shalini-SL3-wt.17902.17902.2	4.5738	0.6083	100	1390.68	1390.68	-3.2	6.62721e+06	1	12.3777	4.14	75	3	K.QSLEASLAETEGR.Y
*	2016-11-16-hjk-Sharma-Shalini-SL3-wt.23599.23599.2	5.4246	0.6641	100	2083.95	2082.96	-6.8	3.87574e+06	1	14.4625	3.96	72	4	R.AETECQNTEYQQLLDIK.I
*	2016-11-16-hjk-Sharma-Shalini-SL3-wt.15675.15675.2	4.5982	0.5888	100	1434.77	1434.77	-1.7	203460368	1	11.8189	6.56	89.5	3	K.IRLENEIQTYR.S
*	2016-11-16-hjk-Sharma-Shalini-SL3-wt.15674.15674.3	3.1259	0.3513	100	1434.77	1434.77	-0.7	131587176	1	9.27629	6.56	36.8	3	K.IRLENEIQTYR.S
*	2016-11-16-hjk-Sharma-Shalini-SL3-wt.11970.11970.2	2.7608	0.431	100	1165.58	1165.58	-0.5	50392844	1	9.39433	4.46	68.8	1	R.LENEIQTYR.S
*	2016-11-16-hjk-Sharma-Shalini-SL3-wt.9689.9689.2	3.1822	0.5423	100	1262.6	1262.6	-1.4	231288000	1	13.963	4.46	66.7	3	R.SLLEGEGSSGGGGR.G
*	2016-11-16-hjk-Sharma-Shalini-SL3-wt.2171.2171.2	2.6243	0.4339	100	1185.52	1185.52	-0.9	2.00768e+06	1	8.6665	6.56	61.9	2	K.SSSSGSVGESSSK.G
P01857	13	33	0.455	330	36106	8.2	U	0.00499738	1.85102	Ig gamma-1 chain C region OS=Homo sapiens GN=IGHG1 PE=1 SV=1	0	33	0
*	2016-11-16-hjk-Sharma-Shalini-SL3-wt.19898.19898.2	2.7478	0.5913	100	1186.65	1186.65	-0.6	150840208	1	14.9196	9.08	68.4	3	K.GPSVFPLAPSSK.S
	2016-11-16-hjk-Sharma-Shalini-SL3-wt.17686.17686.2	3.4856	0.4697	100	1321.68	1321.68	-0.6	36994944	1	9.66295	8.26	60.9	2	K.STSGGTAALGCLVK.D
*	2016-11-16-hjk-Sharma-Shalini-SL3-wt.21844.21844.2	4.8166	0.61	100	2140.02	2139.03	-3.8	2.49101e+06	1	15.3512	4.25	60	1	R.TPEVTCVVVDVSHEDPEVK.F
*	2016-11-16-hjk-Sharma-Shalini-SL3-wt.21604.21604.3	4.492	0.6295	100	2139.03	2139.03	-0.1	3320236	1	12.0839	4.25	32.8	2	R.TPEVTCVVVDVSHEDPEVK.F
*	2016-11-16-hjk-Sharma-Shalini-SL3-wt.20878.20878.2	4.3034	0.5706	100	1677.8	1677.8	-1	5.45952e+06	1	13.1532	5.63	69.6	4	K.FNWYVDGVEVHNAK.T
*	2016-11-16-hjk-Sharma-Shalini-SL3-wt.21003.21003.3	2.9001	0.4449	100	1677.8	1677.8	0.5	5888030	1	13.928	5.63	33.3	4	K.FNWYVDGVEVHNAK.T
	2016-11-16-hjk-Sharma-Shalini-SL3-wt.11579.11579.2	1.3471	0.4433	99.4	838.503	838.503	-0.4	133099448	1	8.97751	6.56	63.6	1	K.ALPAPIEK.T
	2016-11-16-hjk-Sharma-Shalini-SL3-wt.15642.15642.2	2.6654	0.5775	100	1286.67	1286.67	-0.9	1.79738e+06	1	9.55198	6.56	72.2	4	R.EPQVYTLPPSR.D
	2016-11-16-hjk-Sharma-Shalini-SL3-wt.19822.19822.2	2.4581	0.4407	100	1161.63	1161.63	-0.3	2.35221e+06	1	9.68882	8.26	68.8	1	K.NQVSLTCLVK.G
	2016-11-16-hjk-Sharma-Shalini-SL3-wt.26726.26726.2	5.5778	0.6933	100	2544.13	2544.13	-0.3	25221860	1	16.7772	3.96	80.6	5	K.GFYPSDIAVEWESNGQPENNYK.T
*	2016-11-16-hjk-Sharma-Shalini-SL3-wt.27258.27258.2	4.3253	0.6622	100	1873.92	1873.92	0.5	2.36187e+06	1	15.2949	4.46	56.7	4	K.TTPPVLDSDGSFFLYSK.L
	2016-11-16-hjk-Sharma-Shalini-SL3-wt.20423.20423.4	4.3369	0.6055	100	2801.27	2801.27	0.1	1.34292e+06	1	11.6547	7.49	24	1	R.WQQGNVFSCSVMHEALHNHYTQK.S
	2016-11-16-hjk-Sharma-Shalini-SL3-wt.20411.20411.5	3.6293	0.6206	100	2801.27	2801.27	0	1.32153e+06	1	10.1691	7.49	24.2	1	R.WQQGNVFSCSVMHEALHNHYTQK.S
Q13835	27	32	0.452	747	82861	9.1	U	0.00214078	1.83139	Plakophilin-1 OS=Homo sapiens GN=PKP1 PE=1 SV=2	0	32	0
*	2016-11-16-hjk-Sharma-Shalini-SL3-wt.14027.14027.2	2.6513	0.4134	100	1192.61	1192.61	-1	2.56786e+06	1	9.54784	6.56	58.8	1	R.VQEQVMMTVK.R
*	2016-11-16-hjk-Sharma-Shalini-SL3-wt.19649.19649.2	5.2791	0.7713	100	1984.83	1984.83	-1.5	2517194	1	17.9702	4.46	71.9	1	R.GSMYDGLADNYNYGTTSR.S
*	2016-11-16-hjk-Sharma-Shalini-SL3-wt.24734.24734.2	4.977	0.6365	100	1972.95	1972.96	-1.1	1.10568e+06	1	12.8888	8.64	48.4	1	K.FQAGNGSWGYPIYNGTLK.R
*	2016-11-16-hjk-Sharma-Shalini-SL3-wt.19489.19489.2	3.9206	0.5613	100	1521.64	1521.64	-1.8	4.55924e+06	1	10.5112	6.56	68.2	1	R.FSSYSQMENWSR.H
*	2016-11-16-hjk-Sharma-Shalini-SL3-wt.13546.13546.2	2.5367	0.6014	100	1327.57	1327.56	3	3.938e+06	1	14.9264	8.22	57.9	1	R.YSFYSTCSGQK.A
*	2016-11-16-hjk-Sharma-Shalini-SL3-wt.9912.9912.2	2.903	0.6445	100	1267.61	1267.62	-1.3	3.86224e+06	1	12.3462	4.46	76.5	1	K.AVQYLSSQDEK.Y
*	2016-11-16-hjk-Sharma-Shalini-SL3-wt.21284.21284.3	5.4198	0.6527	100	2393.09	2393.09	-0.2	1.92938e+06	1	16.3467	5.63	39.3	3	K.YQAIGAYYIQHTCFQDESAK.Q
*	2016-11-16-hjk-Sharma-Shalini-SL3-wt.16194.16194.2	2.394	0.3999	99.2	1294.66	1293.66	-5.8	3.50377e+06	1	7.94767	8.26	72.2	1	K.QQVYQLGGICK.L
*	2016-11-16-hjk-Sharma-Shalini-SL3-wt.14210.14210.2	4.6684	0.7069	100	1524.79	1524.79	-1	2.38405e+06	1	16.7656	10.06	80	2	R.SPNQNVQQAAAGALR.N
*	2016-11-16-hjk-Sharma-Shalini-SL3-wt.3332.3332.2	2.0622	0.2531	99.6	1049.56	1049.56	-0.8	680303	1	5.5354	9.08	76.9	1	R.STTNKLETR.R
*	2016-11-16-hjk-Sharma-Shalini-SL3-wt.28785.28785.2	4.0821	0.5459	100	1524.83	1524.83	0.2	1.61826e+06	1	11.2505	3.96	57.7	2	K.EELIADALPVLADR.V
*	2016-11-16-hjk-Sharma-Shalini-SL3-wt.29360.29360.2	4.3882	0.6541	100	1852.89	1852.89	1.1	1.01613e+06	1	13.6374	4.14	65.4	1	R.EVVDPEVFFNATGCLR.K
*	2016-11-16-hjk-Sharma-Shalini-SL3-wt.21114.21114.3	5.3463	0.6198	100	1881.84	1881.84	-0.6	3.79816e+06	1	12.862	7.16	43.2	1	K.SVENCMCVLHNLSYR.L
*	2016-11-16-hjk-Sharma-Shalini-SL3-wt.9715.9715.2	2.2176	0.5227	100	900.477	900.479	-1.8	7983159	1	8.90364	4.46	57.1	1	R.LDAEVPTR.Y
*	2016-11-16-hjk-Sharma-Shalini-SL3-wt.7995.7995.2	2.1102	0.4463	100	1212.61	1212.61	-0.7	2.30398e+06	1	7.69393	8.8	71.4	1	R.YRQLEYNAR.N
*	2016-11-16-hjk-Sharma-Shalini-SL3-wt.16466.16466.2	2.973	0.4589	100	1361.66	1361.66	-1.2	10989880	1	9.32457	7.33	75	1	K.GSGWLYHSDAIR.T
*	2016-11-16-hjk-Sharma-Shalini-SL3-wt.16452.16452.3	2.5913	0.4986	100	1362.66	1361.66	-0.4	4214060	1	7.76712	7.33	39.4	1	K.GSGWLYHSDAIR.T
*	2016-11-16-hjk-Sharma-Shalini-SL3-wt.19503.19503.2	1.9046	0.4421	99.9	939.496	939.497	-0.8	2.03211e+06	1	10.0014	8.8	64.3	1	R.TYLNLMGK.S
*	2016-11-16-hjk-Sharma-Shalini-SL3-wt.24221.24221.2	5.4139	0.6352	100	1833.9	1833.9	2.1	2.36345e+06	1	13.9999	4.46	71	1	K.DATLEACAGALQNLTASK.G
*	2016-11-16-hjk-Sharma-Shalini-SL3-wt.27475.27475.2	2.8638	0.4989	100	1421.75	1421.75	0.6	2.08317e+06	1	9.11601	9.08	60.9	1	K.GLMSSGMSQLIGLK.E
*	2016-11-16-hjk-Sharma-Shalini-SL3-wt.9976.9976.2	2.9158	0.4861	100	1187.64	1187.64	-1	4370746	1	8.64203	6.56	70	2	R.LLQSGNSDVVR.S
*	2016-11-16-hjk-Sharma-Shalini-SL3-wt.17087.17087.2	2.6739	0.5298	100	1122.56	1122.56	0.4	2.38581e+06	1	10.8168	10.06	70.6	1	R.SGASLLSNMSR.H
*	2016-11-16-hjk-Sharma-Shalini-SL3-wt.19161.19161.2	3.6012	0.5749	100	1376.7	1376.7	-1.6	3902685	1	10.894	6.56	76.2	1	R.VMGNQVFPEVTR.L
*	2016-11-16-hjk-Sharma-Shalini-SL3-wt.19957.19957.3	5.0277	0.5781	100	2626.24	2626.24	-0.7	3.86327e+06	1	11.9725	5.63	37.5	1	R.LLTSHTGNTSNSEDILSSACYTVR.N
*	2016-11-16-hjk-Sharma-Shalini-SL3-wt.13854.13854.2	2.1359	0.4539	100	1200.64	1200.64	-0.6	9152016	1	8.71312	9.08	50	1	R.NLMASQPQLAK.Q
*	2016-11-16-hjk-Sharma-Shalini-SL3-wt.12389.12389.2	1.6842	0.3379	99.7	814.478	814.478	-0.1	6.72321e+06	1	5.99589	6.56	58.3	1	K.ELQGVLR.Q
*	2016-11-16-hjk-Sharma-Shalini-SL3-wt.22501.22501.2	3.2088	0.4971	100	1317.69	1317.69	0.2	2.40006e+06	1	9.31548	10.06	59.1	1	R.NMLGTLAGANSLR.N
P05109	6	7	0.452	93	10834	7	U	0.00376147	1.83139	Protein S100-A8 OS=Homo sapiens GN=S100A8 PE=1 SV=1	0	7	0
*	2016-11-16-hjk-Sharma-Shalini-SL3-wt.19054.19054.2	3.0953	0.5594	100	1272.69	1272.69	-0.3	5.13561e+06	1	11.247	7.33	72.2	2	K.ALNSIIDVYHK.Y
*	2016-11-16-hjk-Sharma-Shalini-SL3-wt.10323.10323.2	3.903	0.5352	100	1434.71	1434.71	-1.3	1.62458e+06	1	8.69437	7.33	85	1	K.GNFHAVYRDDLK.K
*	2016-11-16-hjk-Sharma-Shalini-SL3-wt.17001.17001.2	3.2418	0.3791	100	1421.71	1421.71	-1.6	8414640	1	9.98996	4.46	60	1	K.LLETECPQYIR.K
*	2016-11-16-hjk-Sharma-Shalini-SL3-wt.12877.12877.2	4.1243	0.5756	100	1549.8	1549.8	-0.3	1.9878e+06	1	10.2705	6.56	72.7	1	K.LLETECPQYIRK.K
*	2016-11-16-hjk-Sharma-Shalini-SL3-wt.12892.12892.3	2.9773	0.4073	100	1549.8	1549.8	0.1	4.67368e+06	1	8.72655	6.56	34.2	1	K.LLETECPQYIRK.K
*	2016-11-16-hjk-Sharma-Shalini-SL3-wt.18858.18858.2	1.7508	0.2645	99.4	822.414	822.414	-0.4	4.76479e+06	1	7.08517	6.56	70	1	K.GADVWFK.E
P31946	11	11	0.451	246	28082	4.8	U	0.0022346	1.82488	14-3-3 protein beta/alpha OS=Homo sapiens GN=YWHAB PE=1 SV=3	0	11	0
	2016-11-16-hjk-Sharma-Shalini-SL3-wt.3510.3510.2	2.0684	0.1479	99.2	816.422	816.421	1	1.01036e+06	1	6.57676	4.46	66.7	1	K.LAEQAER.Y
	2016-11-16-hjk-Sharma-Shalini-SL3-wt.16642.16642.3	3.2166	0.3108	100	1812.83	1812.83	-0.1	3.97961e+06	1	7.33346	4.4	31.5	1	K.LAEQAERYDDMAAAMK.A
	2016-11-16-hjk-Sharma-Shalini-SL3-wt.12128.12128.2	2.1106	0.7714	100	1015.42	1015.42	-0.1	7576220	1	10.6902	4.46	62.5	1	R.YDDMAAAMK.A
*	2016-11-16-hjk-Sharma-Shalini-SL3-wt.6285.6285.2	5.9332	0.6867	100	1598.74	1598.74	-1.2	6.58239e+06	1	14.4524	4.4	100	1	K.AVTEQGHELSNEER.N
*	2016-11-16-hjk-Sharma-Shalini-SL3-wt.6282.6282.3	3.5971	0.4726	100	1598.74	1598.74	0.2	6.9736e+06	1	11.1959	4.4	41.9	1	K.AVTEQGHELSNEER.N
	2016-11-16-hjk-Sharma-Shalini-SL3-wt.18610.18610.2	1.8252	0.2732	99.2	907.524	907.525	-1.3	7847973	1	7.16393	8.8	57.1	1	R.NLLSVAYK.N
*	2016-11-16-hjk-Sharma-Shalini-SL3-wt.15294.15294.2	2.2573	0.3517	99.8	1360.71	1360.71	-1.4	8338496	1	7.45851	6.56	50	1	K.YLIPNATQPESK.V
*	2016-11-16-hjk-Sharma-Shalini-SL3-wt.8668.8668.2	2.5355	0.5572	100	1182.56	1182.56	-0.6	8550438	1	12.7265	4.46	68.4	1	R.YLSEVASGDNK.Q
*	2016-11-16-hjk-Sharma-Shalini-SL3-wt.20671.20671.2	7.2688	0.7265	100	2159.03	2159.03	1.9	2597716	1	18.2638	4.46	68.8	1	K.QTTVSNSQQAYQEAFEISK.K
	2016-11-16-hjk-Sharma-Shalini-SL3-wt.5616.5616.2	2.1363	0.4078	100	1108.56	1108.56	0.7	3.49629e+06	1	8.28074	7.33	64.3	1	K.EMQPTHPIR.L
*	2016-11-16-hjk-Sharma-Shalini-SL3-wt.23866.23866.2	2.1036	0.7491	100	2350.95	2350.95	-1.5	335859	1	8.50366	3.2	50	1	R.DNLTLWTSENQGDEGDAGEGEN.-
P05114	4	4	0.45	100	10659	9.6	U	0.00199895	1.81838	Non-histone chromosomal protein HMG-14 OS=Homo sapiens GN=HMGN1 PE=1 SV=3	0	4	0
*	2016-11-16-hjk-Sharma-Shalini-SL3-wt.3945.3945.2	3.9233	0.5084	100	1302.65	1302.65	-1.2	642924	1	10.6773	4.72	72.7	1	K.VSSAEGAAKEEPK.R
*	2016-11-16-hjk-Sharma-Shalini-SL3-wt.3670.3670.2	1.7092	0.2521	99	811.503	811.504	-0.8	1.63005e+06	1	7.39093	10.04	78.6	1	R.LSAKPPAK.V
*	2016-11-16-hjk-Sharma-Shalini-SL3-wt.9479.9479.3	2.99	0.7078	99.9	2533.1	2533.11	-3.7	907221	1	13.4877	3.89	26.1	1	K.EDLPAENGETKTEESPASDEAGEK.E
*	2016-11-16-hjk-Sharma-Shalini-SL3-wt.4485.4485.2	2.8459	0.7074	100	1349.57	1349.57	-0.8	810911	1	12.3266	3.86	63.6	1	K.TEESPASDEAGEK.E
O43707	42	47	0.449	911	104854	5.4	U	0.00257823	1.8119	Alpha-actinin-4 OS=Homo sapiens GN=ACTN4 PE=1 SV=2	0	47	0
	2016-11-16-hjk-Sharma-Shalini-SL3-wt.26092.26092.2	2.1725	0.5611	100	1199.63	1199.63	-1.1	2.06535e+06	1	10.4828	4.14	62.5	1	R.DLLLDPAWEK.Q
	2016-11-16-hjk-Sharma-Shalini-SL3-wt.15739.15739.2	3.2679	0.7153	100	1392.65	1392.65	-1.1	3.4446e+06	1	14.2344	8.29	77.8	1	K.TFTAWCNSHLR.K
	2016-11-16-hjk-Sharma-Shalini-SL3-wt.15752.15752.3	2.3144	0.5262	100	1392.65	1392.65	-0.8	2.7114e+06	1	11.9604	8.29	36.4	1	K.TFTAWCNSHLR.K
*	2016-11-16-hjk-Sharma-Shalini-SL3-wt.22291.22291.2	4.5867	0.675	100	1920.93	1920.93	-1	789689	1	14.9026	4.25	69.2	1	K.AGTQIENIDEDFRDGLK.L
*	2016-11-16-hjk-Sharma-Shalini-SL3-wt.22267.22267.3	4.2336	0.5568	100	1920.93	1920.93	0.3	6.18677e+06	1	10.7507	4.25	40.4	1	K.AGTQIENIDEDFRDGLK.L
	2016-11-16-hjk-Sharma-Shalini-SL3-wt.17604.17604.2	1.8206	0.3535	99.8	864.482	864.483	-0.4	3.00962e+06	1	6.8919	6.56	76.9	1	K.ALDFIASK.G
*	2016-11-16-hjk-Sharma-Shalini-SL3-wt.20699.20699.2	4.0694	0.6154	100	1514.8	1514.81	-2.2	1.68729e+06	1	12.7782	4.14	53.8	1	K.LVSIGAEEIVDGNAK.M
	2016-11-16-hjk-Sharma-Shalini-SL3-wt.21853.21853.2	3.5569	0.5732	100	1537.77	1537.77	-1.8	2.65509e+06	1	11.0453	4.14	66.7	1	R.FAIQDISVEETSAK.E
	2016-11-16-hjk-Sharma-Shalini-SL3-wt.24927.24927.2	2.2888	0.3953	99.3	1174.6	1174.6	-5.4	2.55165e+06	1	8.00059	6.56	62.5	1	K.EGLLLWCQR.K
*	2016-11-16-hjk-Sharma-Shalini-SL3-wt.21894.21894.2	3.9417	0.6002	100	1485.75	1485.76	-4.1	1.87174e+06	1	12.5121	9.08	77.3	1	K.NVNVQNFHISWK.D
	2016-11-16-hjk-Sharma-Shalini-SL3-wt.22761.22761.2	2.6206	0.3434	100	1226.66	1226.66	0.3	2.95208e+06	1	7.26163	7.33	55	1	K.DGLAFNALIHR.H
*	2016-11-16-hjk-Sharma-Shalini-SL3-wt.9121.9121.2	3.4217	0.4107	100	1299.66	1299.67	-3.7	1.8694e+06	1	7.02975	5.8	77.8	1	R.HRPELIEYDK.L
*	2016-11-16-hjk-Sharma-Shalini-SL3-wt.9085.9085.3	3.0569	0.4036	100	1299.67	1299.67	-0.2	4.44379e+06	1	6.9679	5.8	58.6	1	R.HRPELIEYDK.L
*	2016-11-16-hjk-Sharma-Shalini-SL3-wt.25470.25470.2	4.8153	0.6935	100	1775.84	1775.84	-0.7	2631913	1	18.731	3.96	63.3	2	K.DDPVTNLNNAFEVAEK.Y
*	2016-11-16-hjk-Sharma-Shalini-SL3-wt.18034.18034.2	5.6626	0.7351	100	2060.96	2060.96	0.8	2404685	1	19.505	4.25	72.4	1	K.VLAVNQENEHLMEDYEK.L
*	2016-11-16-hjk-Sharma-Shalini-SL3-wt.18003.18003.3	5.0124	0.5507	100	2060.96	2060.96	0	3.51578e+06	1	13.5476	4.25	36.4	1	K.VLAVNQENEHLMEDYEK.L
*	2016-11-16-hjk-Sharma-Shalini-SL3-wt.23209.23209.2	1.5538	0.4449	99.8	1029.54	1029.54	0	1.18654e+06	1	8.85613	4.46	58.3	1	R.TIPWLEDR.V
*	2016-11-16-hjk-Sharma-Shalini-SL3-wt.20979.20979.2	2.6022	0.4388	100	1481.81	1481.81	0.6	1.04174e+06	1	8.49986	6.56	65	2	R.TIPWLEDRVPQK.T
*	2016-11-16-hjk-Sharma-Shalini-SL3-wt.20966.20966.3	1.9656	0.4269	99.7	1481.81	1481.81	0.4	586656	1	7.12725	6.56	23.8	1	R.TIPWLEDRVPQK.T
*	2016-11-16-hjk-Sharma-Shalini-SL3-wt.5682.5682.2	1.8602	0.3326	99.8	1005.5	1005.5	0	2.6962e+06	1	7.79834	6.56	57.1	1	K.TIQEMQQK.L
	2016-11-16-hjk-Sharma-Shalini-SL3-wt.23629.23629.2	4.3852	0.4887	100	1608.8	1608.81	-3.1	2830904	1	11.6694	6.56	81.8	1	K.CQLEINFNTLQTK.L
*	2016-11-16-hjk-Sharma-Shalini-SL3-wt.19837.19837.3	3.9884	0.5042	100	1998.93	1998.93	-1.1	3.99171e+06	1	11.4818	4.72	35.2	1	K.MVSDINNGWQHLEQAEK.G
	2016-11-16-hjk-Sharma-Shalini-SL3-wt.29277.29277.2	2.8041	0.6228	100	1421.71	1421.71	-0.3	2.33395e+06	1	12.4823	4.14	76.5	1	K.GYEEWLLNEIR.R
	2016-11-16-hjk-Sharma-Shalini-SL3-wt.4190.4190.2	1.9136	0.3817	99.9	825.447	825.447	0.1	1.02611e+06	1	6.46007	5.63	91.7	1	R.LDHLAEK.F
	2016-11-16-hjk-Sharma-Shalini-SL3-wt.10219.10219.2	2.9825	0.5836	100	1214.58	1214.58	-0.1	1.89502e+06	1	11.7918	5.63	94.4	1	K.ASIHEAWTDGK.E
*	2016-11-16-hjk-Sharma-Shalini-SL3-wt.11956.11956.2	4.2325	0.3906	100	1548.76	1548.77	-1.6	2799228	1	7.17154	5.8	70.8	1	K.HRDYETATLSDIK.A
*	2016-11-16-hjk-Sharma-Shalini-SL3-wt.11911.11911.3	4.9345	0.5495	100	1548.77	1548.77	0.2	2.99317e+06	1	9.00559	5.8	56.8	1	K.HRDYETATLSDIK.A
*	2016-11-16-hjk-Sharma-Shalini-SL3-wt.22036.22036.3	4.1721	0.4247	100	1670.87	1670.87	-2.2	5156723	1	8.57102	4.72	45.5	1	K.QLEAIDQLHLEYAK.R
*	2016-11-16-hjk-Sharma-Shalini-SL3-wt.5644.5644.2	2.1213	0.3178	99.8	1159.57	1159.57	0.3	2.2991e+06	1	5.79366	4.72	58.8	1	K.STLPDADRER.E
*	2016-11-16-hjk-Sharma-Shalini-SL3-wt.11115.11115.2	1.6782	0.3921	99.8	894.541	894.541	0	7050900	1	8.24706	7.33	57.1	1	R.EAILAIHK.E
*	2016-11-16-hjk-Sharma-Shalini-SL3-wt.20380.20380.2	5.9099	0.5658	100	1920	1920.01	-1.4	3157307	1	13.2524	8.8	79.3	2	K.LSGSNPYTTVTPQIINSK.W
*	2016-11-16-hjk-Sharma-Shalini-SL3-wt.8501.8501.2	2.2755	0.142	99.5	811.503	811.504	-1.1	1.54189e+06	1	6.51279	9.08	90.9	1	K.VQQLVPK.R
*	2016-11-16-hjk-Sharma-Shalini-SL3-wt.5107.5107.2	4.2186	0.4648	100	1325.68	1325.68	0.6	2798107	1	9.64561	5.8	95	1	K.RDHALLEEQSK.Q
*	2016-11-16-hjk-Sharma-Shalini-SL3-wt.5070.5070.3	3.7421	0.3301	100	1325.68	1325.68	1.6	2.27625e+06	1	11.0093	5.8	60.6	1	K.RDHALLEEQSK.Q
*	2016-11-16-hjk-Sharma-Shalini-SL3-wt.23426.23426.2	5.5188	0.5992	100	1773.93	1773.93	-0.3	2.17736e+06	1	12.0837	9.08	85.2	2	R.QFASQANVVGPWIQTK.M
	2016-11-16-hjk-Sharma-Shalini-SL3-wt.6828.6828.3	3.0595	0.5404	100	1301.6	1301.61	-1.4	4676706	1	11.5677	7.41	50	1	K.HTNYTMEHIR.V
	2016-11-16-hjk-Sharma-Shalini-SL3-wt.20460.20460.2	3.4516	0.5056	100	1429.77	1429.76	3	6533449	1	10.041	4.46	68.2	1	R.TINEVENQILTR.D
*	2016-11-16-hjk-Sharma-Shalini-SL3-wt.15492.15492.2	2.911	0.5956	100	1352.62	1352.63	-2.4	4.84905e+06	1	12.4552	4.46	72.2	1	K.GISQEQMQEFR.A
*	2016-11-16-hjk-Sharma-Shalini-SL3-wt.7502.7502.2	2.2754	0.5005	100	965.446	965.448	-2	2.44005e+06	1	6.84849	7.33	84.6	1	R.ASFNHFDK.D
*	2016-11-16-hjk-Sharma-Shalini-SL3-wt.12533.12533.2	4.1688	0.6336	100	1256.59	1256.59	-0.6	2.07499e+06	1	16.2109	4.72	90.5	2	K.DHGGALGPEEFK.A
	2016-11-16-hjk-Sharma-Shalini-SL3-wt.16395.16395.2	2.4495	0.6143	100	1561.73	1561.73	-4	1917640	1	10.187	4.14	45.8	1	R.ELPPDQAEYCIAR.M
*	2016-11-16-hjk-Sharma-Shalini-SL3-wt.20968.20968.2	4.5625	0.657	100	1792.86	1792.86	0.1	4.22123e+06	1	14.4284	4.46	70	1	R.MAPYQGPDAVPGALDYK.S
Q9NP97	3	3	0.448	96	10922	7.2	U	0.00156168	1.80543	Dynein light chain roadblock-type 1 OS=Homo sapiens GN=DYNLRB1 PE=1 SV=3	0	3	0
*	2016-11-16-hjk-Sharma-Shalini-SL3-wt.28482.28482.3	2.9591	0.5309	99.9	2386.15	2386.14	2.7	493781	1	10.6254	7.33	18.7	1	K.STMDNPTTTQYASLMHSFILK.A
	2016-11-16-hjk-Sharma-Shalini-SL3-wt.26113.26113.2	3.1331	0.5229	100	1446.72	1446.72	0.3	2.11208e+06	1	10.1362	4.14	65	1	R.DIDPQNDLTFLR.I
*	2016-11-16-hjk-Sharma-Shalini-SL3-wt.8058.8058.2	3.7783	0.5355	100	1144.6	1144.6	0.1	1621351	1	8.87722	6.56	94.4	1	K.KNEIMVAPDK.D
P37802	9	11	0.447	199	22391	8.2	U	0.00276237	1.79898	Transgelin-2 OS=Homo sapiens GN=TAGLN2 PE=1 SV=3	0	11	0
*	2016-11-16-hjk-Sharma-Shalini-SL3-wt.9038.9038.2	1.8394	0.4833	100	820.431	820.431	-0.1	2.44821e+06	1	8.1091	9.08	66.7	1	R.GPAYGLSR.E
*	2016-11-16-hjk-Sharma-Shalini-SL3-wt.22165.22165.2	2.0956	0.33	99.7	1078.53	1078.53	-1.7	5307075	1	5.97013	6.56	57.1	1	R.ENFQNWLK.D
*	2016-11-16-hjk-Sharma-Shalini-SL3-wt.10866.10866.2	3.4206	0.4026	100	1124.61	1124.61	-0.7	3.47452e+06	1	9.20983	10.04	88.9	1	K.KIQASTMAFK.Q
*	2016-11-16-hjk-Sharma-Shalini-SL3-wt.27503.27503.2	4.213	0.5444	100	1678.82	1678.82	1	763825	1	9.89939	4.46	65.4	2	K.QMEQISQFLQAAER.Y
*	2016-11-16-hjk-Sharma-Shalini-SL3-wt.24328.24328.2	3.3563	0.6438	100	1215.69	1215.69	2.3	3535168	1	11.4203	10.06	68.2	1	R.TLMNLGGLAVAR.D
*	2016-11-16-hjk-Sharma-Shalini-SL3-wt.29203.29203.2	2.9464	0.5291	100	1594.72	1594.72	-1.3	3797880	1	9.07488	4.14	70	2	R.DDGLFSGDPNWFPK.K
*	2016-11-16-hjk-Sharma-Shalini-SL3-wt.25434.25434.2	3.8109	0.6081	100	1722.81	1722.81	-0.4	1.71355e+06	1	12.3254	4.72	77.3	1	R.DDGLFSGDPNWFPKK.S
*	2016-11-16-hjk-Sharma-Shalini-SL3-wt.10444.10444.2	2.0735	0.394	99.8	1279.59	1279.59	-1.5	952858	1	6.41459	4.46	45	1	R.NFSDNQLQEGK.N
*	2016-11-16-hjk-Sharma-Shalini-SL3-wt.17358.17358.2	2.7995	0.4461	100	1202.63	1202.63	-2.5	4.08857e+06	1	11.0232	10.06	60	1	K.NVIGLQMGTNR.G
P06702	5	6	0.447	114	13242	6.1	U	0.0026302	1.79898	Protein S100-A9 OS=Homo sapiens GN=S100A9 PE=1 SV=1	0	6	0
*	2016-11-16-hjk-Sharma-Shalini-SL3-wt.28006.28006.2	5.3492	0.6596	100	1806.94	1806.94	-1.4	9446795	1	13.4915	7.33	73.1	1	R.NIETIINTFHQYSVK.L
*	2016-11-16-hjk-Sharma-Shalini-SL3-wt.27944.27944.3	4.0176	0.5186	100	1806.94	1806.94	-1.5	696241	1	11.2348	7.33	40.4	2	R.NIETIINTFHQYSVK.L
*	2016-11-16-hjk-Sharma-Shalini-SL3-wt.11758.11758.2	3.6829	0.5033	100	1455.72	1455.72	-1.3	3.88244e+06	1	9.50906	5.63	87	1	K.LGHPDTLNQGEFK.E
*	2016-11-16-hjk-Sharma-Shalini-SL3-wt.19448.19448.3	1.9795	0.4243	99.3	1742.82	1742.83	-1.1	2.25994e+06	1	7.13676	4.25	28.3	1	K.VIEHIMEDLDTNADK.Q
*	2016-11-16-hjk-Sharma-Shalini-SL3-wt.7484.7484.2	1.7639	0.5505	100	971.494	971.495	-0.5	10436645	1	10.7817	7.33	57.1	1	R.LTWASHEK.M
P29692	9	9	0.445	281	31122	5	U	0.00160058	1.78612	Elongation factor 1-delta OS=Homo sapiens GN=EEF1D PE=1 SV=5	0	9	0
*	2016-11-16-hjk-Sharma-Shalini-SL3-wt.14720.14720.2	3.4111	0.5923	100	1526.7	1526.71	-1.5	2.90369e+06	1	15.3134	6.56	66.7	1	R.FYEQMNGPVAGASR.Q
*	2016-11-16-hjk-Sharma-Shalini-SL3-wt.12171.12171.2	4.153	0.6749	100	2185.05	2185.05	-0.9	1.22281e+06	1	13.3954	5.63	52.8	1	K.SLAGSSGPGASSGTSGDHGELVVR.I
*	2016-11-16-hjk-Sharma-Shalini-SL3-wt.12126.12126.3	6.005	0.6244	100	2185.05	2185.05	-1.1	7.77221e+06	1	15.0378	5.63	43.8	1	K.SLAGSSGPGASSGTSGDHGELVVR.I
*	2016-11-16-hjk-Sharma-Shalini-SL3-wt.16763.16763.2	2.9163	0.4574	100	1358.73	1358.73	-1.6	1.81388e+06	1	10.4281	4.46	47.6	1	R.IASLEVENQSLR.G
*	2016-11-16-hjk-Sharma-Shalini-SL3-wt.26226.26226.2	3.5823	0.6042	100	1299.73	1299.73	1.1	1.31138e+06	1	10.6448	6.56	84.2	1	R.GVVQELQQAISK.L
*	2016-11-16-hjk-Sharma-Shalini-SL3-wt.6342.6342.3	2.6476	0.6092	100	1423.71	1423.71	-0.7	5.91085e+06	1	10.2564	10.06	36.6	1	R.ATAPQTQHVSPMR.Q
*	2016-11-16-hjk-Sharma-Shalini-SL3-wt.20366.20366.3	4.7098	0.7697	100	2909.19	2909.2	-1.3	784948	1	11.6967	3.71	34.1	1	K.KPATPAEDDEDDDIDLFGSDNEEEDK.E
*	2016-11-16-hjk-Sharma-Shalini-SL3-wt.26560.26560.2	3.2041	0.3547	100	1373.74	1373.74	0	2.71675e+06	1	10.3034	6.56	66.7	1	R.SIQLDGLVWGASK.L
	2016-11-16-hjk-Sharma-Shalini-SL3-wt.17968.17968.2	2.4887	0.4303	99.9	1346.66	1346.66	-2.5	5813801	1	7.31705	4.14	60	1	K.LQIQCVVEDDK.V
P80723	6	6	0.445	227	22693	4.6	U	0.00132089	1.78612	Brain acid soluble protein 1 OS=Homo sapiens GN=BASP1 PE=1 SV=2	0	6	0
*	2016-11-16-hjk-Sharma-Shalini-SL3-wt.8363.8363.3	3.0464	0.5314	99.9	2298.13	2298.14	-2.3	795723	1	8.79405	4.4	27.5	1	K.AEPPKAPEQEQAAPGPAAGGEAPK.A
*	2016-11-16-hjk-Sharma-Shalini-SL3-wt.9398.9398.3	4.8986	0.6773	100	2636.23	2636.23	0.7	2.34298e+06	1	15.2399	4.03	30	1	K.AAEAAAAPAESAAPAAGEEPSKEEGEPK.K
*	2016-11-16-hjk-Sharma-Shalini-SL3-wt.4583.4583.2	5.3311	0.3619	100	1412.73	1412.74	-2.2	1.38867e+06	1	12.3305	6.56	88.5	1	K.KTEAPAAPAAQETK.S
*	2016-11-16-hjk-Sharma-Shalini-SL3-wt.4187.4187.2	2.6665	0.5367	100	1932.88	1932.88	-1.5	507694	1	11.6742	4.72	30.3	1	K.SDGAPASDSKPGSSEAAPSSK.E
*	2016-11-16-hjk-Sharma-Shalini-SL3-wt.4165.4165.3	3.718	0.6359	100	1932.88	1932.88	-1.3	961646	1	11.0433	4.72	33.3	1	K.SDGAPASDSKPGSSEAAPSSK.E
*	2016-11-16-hjk-Sharma-Shalini-SL3-wt.6395.6395.2	2.9152	0.6465	100	1386.67	1386.67	-1.6	5500001	1	13.6615	4.46	58.3	1	K.ETPAATEAPSSTPK.A
P07437	19	32	0.444	444	49671	4.9	U	0.00360171	1.77971	Tubulin beta chain OS=Homo sapiens GN=TUBB PE=1 SV=2	0	32	0
*	2016-11-16-hjk-Sharma-Shalini-SL3-wt.14088.14088.2	3.2524	0.6501	100	1301.64	1301.64	-0.8	12541609	1	15.6877	6.56	61.9	1	R.ISVYYNEATGGK.Y
	2016-11-16-hjk-Sharma-Shalini-SL3-wt.25159.25159.2	4.2307	0.6359	100	1615.84	1615.84	1.4	2785978	1	15.7002	4.14	76	1	R.AILVDLEPGTMDSVR.S
	2016-11-16-hjk-Sharma-Shalini-SL3-wt.29214.29214.3	7.6114	0.6587	100	2798.34	2798.34	-1.1	7057423	1	14.0253	9.08	44.7	3	R.SGPFGQIFRPDNFVFGQSGAGNNWAK.G
	2016-11-16-hjk-Sharma-Shalini-SL3-wt.28658.28658.3	6.1413	0.5781	100	2087.08	2087.08	1.5	3.11666e+06	1	12.4574	4.89	53.2	1	K.GHYTEGAELVDSVLDVVRK.E
	2016-11-16-hjk-Sharma-Shalini-SL3-wt.28672.28672.4	3.7155	0.5498	100	2087.08	2087.08	1.3	319478	1	9.98427	4.89	21.7	1	K.GHYTEGAELVDSVLDVVRK.E
	2016-11-16-hjk-Sharma-Shalini-SL3-wt.5720.5720.2	2.2041	0.4489	100	1077.53	1077.53	-0.1	4.63008e+06	1	7.67113	4.72	76.9	1	K.IREEYPDR.I
	2016-11-16-hjk-Sharma-Shalini-SL3-wt.21042.21042.2	3.3773	0.5809	100	1319.71	1319.7	1.8	2417879	1	8.50453	9.08	59.1	3	R.IMNTFSVVPSPK.V
	2016-11-16-hjk-Sharma-Shalini-SL3-wt.18166.18166.2	2.6803	0.438	100	1130.6	1130.6	0.6	1.80559e+06	1	8.33924	6.56	83.3	1	R.FPGQLNADLR.K
	2016-11-16-hjk-Sharma-Shalini-SL3-wt.13899.13899.3	2.6112	0.4112	99.9	1258.69	1258.69	-0.8	1.47102e+06	1	6.48957	9.08	38.9	2	R.FPGQLNADLRK.L
	2016-11-16-hjk-Sharma-Shalini-SL3-wt.24167.24167.2	2.9885	0.3517	100	1143.63	1143.63	0.6	2524926	1	9.96724	10.06	76.5	2	K.LAVNMVPFPR.L
	2016-11-16-hjk-Sharma-Shalini-SL3-wt.28510.28510.2	3.1925	0.6845	100	1620.83	1620.84	-1.1	848601	1	13.2664	10.06	52	1	R.LHFFMPGFAPLTSR.G
	2016-11-16-hjk-Sharma-Shalini-SL3-wt.28492.28492.3	3.2716	0.4933	100	1620.83	1620.84	-0.8	1.03056e+06	1	10.0591	10.06	38	2	R.LHFFMPGFAPLTSR.G
*	2016-11-16-hjk-Sharma-Shalini-SL3-wt.28279.28279.2	3.3781	0.4946	100	1659.9	1659.9	1.2	3.88606e+06	1	11.9978	4.46	64	4	R.ALTVPELTQQVFDAK.N
	2016-11-16-hjk-Sharma-Shalini-SL3-wt.8852.8852.2	1.6049	0.7151	100	1065.43	1065.43	-0.7	4312242	1	7.5246	6.56	50	1	K.NMMAACDPR.H
	2016-11-16-hjk-Sharma-Shalini-SL3-wt.24628.24628.2	2.2694	0.6308	100	1039.59	1039.59	-0.1	3.66999e+06	1	14.0994	9.08	62.5	2	R.YLTVAAVFR.G
	2016-11-16-hjk-Sharma-Shalini-SL3-wt.14846.14846.2	3.4084	0.4452	100	1446.68	1446.69	-4.2	23156512	1	9.98449	4.14	80	2	K.EVDEQMLNVQNK.N
	2016-11-16-hjk-Sharma-Shalini-SL3-wt.27074.27074.2	4.101	0.6207	100	1696.84	1696.83	1.9	3.6942e+06	1	16.715	6.56	86.4	2	K.NSSYFVEWIPNNVK.T
	2016-11-16-hjk-Sharma-Shalini-SL3-wt.21475.21475.2	2.7228	0.4641	100	1385.7	1385.7	0.5	4659593	1	6.99092	10.06	55	1	K.RISEQFTAMFR.R
	2016-11-16-hjk-Sharma-Shalini-SL3-wt.24170.24170.2	2.6166	0.4784	100	1229.6	1229.6	-0.6	5.8516e+06	1	10.287	6.56	61.1	1	R.ISEQFTAMFR.R
P13928	12	12	0.443	327	36881	5.8	U	0.0018339	1.77332	Annexin A8 OS=Homo sapiens GN=ANXA8 PE=1 SV=3	0	12	0
Q5VT79	12	12	0.443	327	36865	5.6	U	0.0018339	1.77332	Annexin A8-like protein 2 OS=Homo sapiens GN=ANXA8L2 PE=2 SV=1	0	12	0
	2016-11-16-hjk-Sharma-Shalini-SL3-wt.15445.15445.2	5.5259	0.6455	100	1807.81	1807.81	-3.1	2834299	1	14.0921	4.72	78.6	1	K.SSSHFNPDPDAETLYK.A
	2016-11-16-hjk-Sharma-Shalini-SL3-wt.15439.15439.3	2.3797	0.5213	100	1807.81	1807.81	-0.7	4572140	1	9.28656	4.72	28.9	1	K.SSSHFNPDPDAETLYK.A
	2016-11-16-hjk-Sharma-Shalini-SL3-wt.28723.28723.2	4.8283	0.535	100	1571.86	1571.86	-0.2	1243042	1	12.8974	4.46	76	1	K.GIGTNEQAIIDVLTK.R
	2016-11-16-hjk-Sharma-Shalini-SL3-wt.27195.27195.2	3.1913	0.611	100	1335.75	1335.75	0.8	801206	1	14.0142	8.8	66.7	1	R.LIVALMYPPYR.Y
	2016-11-16-hjk-Sharma-Shalini-SL3-wt.28430.28430.2	2.6952	0.5554	100	1199.7	1199.7	1.5	430365	1	10.9625	4.46	57.9	1	K.EGVIIEILASR.T
	2016-11-16-hjk-Sharma-Shalini-SL3-wt.29294.29294.2	3.6241	0.7763	100	2740.17	2740.17	-3.2	168103	1	14.8866	3.64	35.1	1	K.AYEEDYGSSLEEDIQADTSGYLER.I
	2016-11-16-hjk-Sharma-Shalini-SL3-wt.22323.22323.2	2.5768	0.2856	99.9	1158.67	1158.67	-0.3	1.52371e+06	1	7.6795	8.26	72.2	1	R.ILVCLLQGSR.D
	2016-11-16-hjk-Sharma-Shalini-SL3-wt.21890.21890.2	1.9931	0.3129	99.8	1023.57	1023.57	0.1	3.95541e+06	1	8.28965	8.26	64.3	1	K.FITILCTR.S
	2016-11-16-hjk-Sharma-Shalini-SL3-wt.10460.10460.2	1.6319	0.3561	99.5	943.44	943.441	-0.9	2947047	1	7.50418	4.14	63.6	1	R.VFEEYEK.I
	2016-11-16-hjk-Sharma-Shalini-SL3-wt.24159.24159.3	4.041	0.5738	100	1730.86	1730.86	0.5	792602	1	12.6416	4.72	45.8	1	K.SETHGSLEEAMLTVVK.C
	2016-11-16-hjk-Sharma-Shalini-SL3-wt.14002.14002.3	3.2095	0.5306	100	1525.69	1525.69	0.1	4.43059e+06	1	9.31082	7.11	48.7	1	K.CTQNLHSYFAER.L
	2016-11-16-hjk-Sharma-Shalini-SL3-wt.23780.23780.2	4.0435	0.6118	100	1677.73	1677.73	-5.2	1.94958e+06	1	11.1486	4.14	69.2	1	K.TLSSMIMEDTSGDYK.N
P11142	27	38	0.441	646	70898	5.5	U	0.00293963	1.76058	Heat shock cognate 71 kDa protein OS=Homo sapiens GN=HSPA8 PE=1 SV=1	0	38	0
*	2016-11-16-hjk-Sharma-Shalini-SL3-wt.24135.24135.3	6.1156	0.7502	100	2263.11	2263.12	-1.2	1.78879e+06	1	19.3604	7.11	37.5	1	K.GPAVGIDLGTTYSCVGVFQHGK.V
	2016-11-16-hjk-Sharma-Shalini-SL3-wt.18328.18328.2	3.0852	0.6449	100	1487.7	1487.7	-0.9	3.92852e+06	1	12.3086	4.46	63.6	2	R.TTPSYVAFTDTER.L
*	2016-11-16-hjk-Sharma-Shalini-SL3-wt.18614.18614.2	4.5844	0.6866	100	1649.79	1649.8	-0.4	4.12094e+06	1	17.0186	6.56	73.1	2	K.NQVAMNPTNTVFDAK.R
*	2016-11-16-hjk-Sharma-Shalini-SL3-wt.13034.13034.2	4.3598	0.4044	100	1410.67	1410.67	-1.5	7.30755e+06	1	11.8238	4.72	86.4	2	R.RFDDAVVQSDMK.H
*	2016-11-16-hjk-Sharma-Shalini-SL3-wt.19523.19523.3	3.8145	0.6419	100	1653.83	1653.83	-0.3	6494139	1	14.3455	9.08	41.3	3	K.HWPFMVVNDAGRPK.V
	2016-11-16-hjk-Sharma-Shalini-SL3-wt.5954.5954.2	2.4894	0.5782	100	1180.62	1180.62	-0.4	13811089	1	11.1495	6.56	56.2	1	K.VQVEYKGETK.S
*	2016-11-16-hjk-Sharma-Shalini-SL3-wt.26132.26132.2	3.1823	0.5567	100	1616.78	1616.79	-3.5	6.25329e+06	1	11.736	4.46	60.9	2	K.SFYPEEVSSMVLTK.M
*	2016-11-16-hjk-Sharma-Shalini-SL3-wt.14944.14944.2	1.621	0.4283	99.6	993.524	993.525	-1.2	21446790	1	8.47631	4.46	50	1	K.EIAEAYLGK.T
*	2016-11-16-hjk-Sharma-Shalini-SL3-wt.23267.23267.2	4.6213	0.5208	100	1982	1982	-0.2	8662057	1	12.1275	6.56	77.8	2	K.TVTNAVVTVPAYFNDSQR.Q
*	2016-11-16-hjk-Sharma-Shalini-SL3-wt.23574.23574.2	3.0286	0.4721	100	1199.67	1199.67	-0.6	3.8495e+06	1	11.5751	6.56	75	2	K.DAGTIAGLNVLR.I
	2016-11-16-hjk-Sharma-Shalini-SL3-wt.24443.24443.2	4.5655	0.6352	100	1659.9	1659.9	1.1	7082671	1	13.3868	4.46	70	1	R.IINEPTAAAIAYGLDK.K
	2016-11-16-hjk-Sharma-Shalini-SL3-wt.21884.21884.3	5.3502	0.6491	100	1787.99	1787.99	-1	1.72153e+06	1	12.3212	6.56	46.7	1	R.IINEPTAAAIAYGLDKK.V
	2016-11-16-hjk-Sharma-Shalini-SL3-wt.10774.10774.2	4.336	0.7919	100	1691.72	1691.73	-1.8	17305542	1	16.6361	4.4	76.9	1	K.STAGDTHLGGEDFDNR.M
	2016-11-16-hjk-Sharma-Shalini-SL3-wt.10763.10763.3	3.9384	0.6147	100	1691.73	1691.73	0.9	8474233	1	10.3425	4.4	43.8	1	K.STAGDTHLGGEDFDNR.M
	2016-11-16-hjk-Sharma-Shalini-SL3-wt.22659.22659.2	3.6805	0.3869	100	1480.75	1480.75	-0.2	6.97555e+06	1	10.8432	4.72	80	1	R.ARFEELNADLFR.G
	2016-11-16-hjk-Sharma-Shalini-SL3-wt.22660.22660.3	3.173	0.5914	100	1480.75	1480.75	0.4	3168873	1	12.0128	4.72	36.8	1	R.ARFEELNADLFR.G
	2016-11-16-hjk-Sharma-Shalini-SL3-wt.24872.24872.2	2.7042	0.4294	100	1253.62	1253.62	-0.9	8304772	1	10.2122	4.14	61.1	1	R.FEELNADLFR.G
*	2016-11-16-hjk-Sharma-Shalini-SL3-wt.15991.15991.2	4.2141	0.6399	100	1481.8	1481.81	-2.1	3.97545e+06	1	13.7684	7.33	87	1	K.SQIHDIVLVGGSTR.I
*	2016-11-16-hjk-Sharma-Shalini-SL3-wt.15976.15976.3	2.6445	0.4257	99.9	1481.81	1481.81	-1	2962837	1	7.6265	7.33	42.5	1	K.SQIHDIVLVGGSTR.I
	2016-11-16-hjk-Sharma-Shalini-SL3-wt.23613.23613.2	1.9522	0.2957	99.3	1081.57	1081.57	-1.9	4830022	1	7.5384	6.56	56.2	2	K.LLQDFFNGK.E
*	2016-11-16-hjk-Sharma-Shalini-SL3-wt.26493.26493.2	5.7306	0.6196	100	2774.33	2774.33	0	1592147	1	18.6755	4.14	56.2	3	K.QTQTFTTYSDNQPGVLIQVYEGER.A
*	2016-11-16-hjk-Sharma-Shalini-SL3-wt.21543.21543.2	1.9433	0.4005	99.7	1197.66	1197.66	1.5	1.18641e+06	1	6.9568	6.56	55	1	K.FELTGIPPAPR.G
*	2016-11-16-hjk-Sharma-Shalini-SL3-wt.21825.21825.2	3.5388	0.7165	100	1303.6	1303.6	-0.6	4464991	1	15.6434	6.56	70	1	K.NSLESYAFNMK.A
*	2016-11-16-hjk-Sharma-Shalini-SL3-wt.26108.26108.2	3.2915	0.4801	100	1304.63	1304.63	-2.1	6.91894e+06	1	9.17339	4.46	70.6	1	K.CNEIINWLDK.N
*	2016-11-16-hjk-Sharma-Shalini-SL3-wt.4579.4579.3	4.8982	0.3667	100	1745.81	1745.81	-0.8	11269480	1	9.28843	4.89	60.5	1	K.NQTAEKEEFEHQQK.E
*	2016-11-16-hjk-Sharma-Shalini-SL3-wt.3329.3329.2	1.9647	0.5022	100	1074.49	1074.49	0	2213278	1	8.69233	4.72	69.2	1	K.EEFEHQQK.E
*	2016-11-16-hjk-Sharma-Shalini-SL3-wt.10904.10904.2	1.798	0.2154	99.2	944.523	944.523	-0.1	7947390	1	5.49705	8.26	61.5	1	K.VCNPIITK.L
P14618	20	27	0.441	531	57937	7.8	U	0.00254104	1.76058	Pyruvate kinase isozymes M1/M2 OS=Homo sapiens GN=PKM2 PE=1 SV=4	0	27	0
*	2016-11-16-hjk-Sharma-Shalini-SL3-wt.18283.18283.2	2.5921	0.4833	100	1197.65	1197.65	-0.8	4.71697e+06	1	10.6979	4.46	60	2	R.LDIDSPPITAR.N
*	2016-11-16-hjk-Sharma-Shalini-SL3-wt.17061.17061.2	3.2858	0.6199	100	1359.7	1359.7	-1.3	11199596	1	11.1702	8.26	63.6	3	R.NTGIICTIGPASR.S
*	2016-11-16-hjk-Sharma-Shalini-SL3-wt.9573.9573.3	5.6026	0.6063	100	1883.9	1883.9	-0.6	3901531	1	11.228	6.77	61.2	1	R.LNFSHGTHEYHAETIK.N
*	2016-11-16-hjk-Sharma-Shalini-SL3-wt.27358.27358.3	5.2414	0.6641	100	2465.29	2465.29	-1.2	2461352	1	12.0627	4.72	32	2	R.TATESFASDPILYRPVAVALDTK.G
*	2016-11-16-hjk-Sharma-Shalini-SL3-wt.26995.26995.4	4.4945	0.5304	100	3018.59	3017.59	-1.8	861580	1	9.61282	4.89	17.4	1	R.TATESFASDPILYRPVAVALDTKGPEIR.T
*	2016-11-16-hjk-Sharma-Shalini-SL3-wt.5839.5839.2	2.9831	0.469	100	1118.61	1118.61	0.3	2.95527e+06	1	8.44404	6.56	72.2	1	K.GSGTAEVELKK.G
*	2016-11-16-hjk-Sharma-Shalini-SL3-wt.17259.17259.2	2.433	0.6259	100	1197.58	1197.58	-0.1	4730901	1	11.2398	4.46	55.6	1	K.ITLDNAYMEK.C
*	2016-11-16-hjk-Sharma-Shalini-SL3-wt.25400.25400.2	4.7539	0.4895	100	1779.87	1779.88	-4.6	3.44352e+06	1	11.1845	4.14	76.7	1	K.GADFLVTEVENGGSLGSK.K
*	2016-11-16-hjk-Sharma-Shalini-SL3-wt.22960.22960.3	6.0221	0.5672	100	1907.97	1907.97	-0.1	2.23367e+06	1	10.8823	4.72	48.3	1	K.GADFLVTEVENGGSLGSKK.G
*	2016-11-16-hjk-Sharma-Shalini-SL3-wt.20668.20668.3	3.1767	0.4028	100	1764.98	1764.99	-0.6	2.5394e+06	1	7.50896	6.56	25.8	1	K.KGVNLPGAAVDLPAVSEK.D
*	2016-11-16-hjk-Sharma-Shalini-SL3-wt.23417.23417.2	3.5973	0.6526	100	1636.89	1636.89	1.1	2436770	1	14.3652	4.46	68	1	K.GVNLPGAAVDLPAVSEK.D
	2016-11-16-hjk-Sharma-Shalini-SL3-wt.19896.19896.2	2.6485	0.4894	100	1141.61	1141.61	0	4.69112e+06	1	8.66888	4.14	82.4	1	R.GDLGIEIPAEK.V
*	2016-11-16-hjk-Sharma-Shalini-SL3-wt.28997.28997.3	3.646	0.6033	100	1876.97	1876.97	-0.2	434897	1	11.2977	8.26	32.1	2	R.AGKPVICATQMLESMIK.K
*	2016-11-16-hjk-Sharma-Shalini-SL3-wt.28313.28313.3	3.379	0.5304	100	1931.99	1931.99	2.5	431850	1	8.58435	4.4	31.6	1	R.EAEAAIYHLQLFEELR.R
*	2016-11-16-hjk-Sharma-Shalini-SL3-wt.26072.26072.3	4.701	0.5009	100	2088.08	2088.09	-1.3	4.2415e+06	1	9.62921	4.89	45.8	1	R.EAEAAIYHLQLFEELRR.L
*	2016-11-16-hjk-Sharma-Shalini-SL3-wt.28162.28162.2	5.3067	0.7014	100	2175.12	2175.12	-0.2	1.59418e+06	1	16.8711	4.14	63.9	2	R.LAPITSDPTEATAVGAVEASFK.C
*	2016-11-16-hjk-Sharma-Shalini-SL3-wt.18105.18105.2	3.028	0.5985	100	1222.64	1221.63	0.3	4234198	1	11.708	8.04	75	1	K.CCSGAIIVLTK.S
*	2016-11-16-hjk-Sharma-Shalini-SL3-wt.23255.23255.2	1.4794	0.3475	99.2	933.522	933.523	-0.4	4.20069e+06	1	9.67365	8.26	58.3	1	R.GIFPVLCK.D
*	2016-11-16-hjk-Sharma-Shalini-SL3-wt.25068.25068.2	4.7195	0.6519	100	1642.76	1642.77	-4.3	1.65529e+06	1	16.5092	3.86	75	2	K.DPVQEAWAEDVDLR.V
*	2016-11-16-hjk-Sharma-Shalini-SL3-wt.16235.16235.2	2.3895	0.577	100	979.502	979.503	-0.6	2777652	1	10.8376	9.08	66.7	1	R.VNFAMNVGK.A
P00558	17	19	0.436	417	44615	8.1	U	0.00227698	1.72898	Phosphoglycerate kinase 1 OS=Homo sapiens GN=PGK1 PE=1 SV=3	0	19	0
*	2016-11-16-hjk-Sharma-Shalini-SL3-wt.11011.11011.2	1.843	0.4974	100	924.424	924.424	-0.5	3.25863e+06	1	8.37711	6.56	57.1	1	K.FCLDNGAK.S
*	2016-11-16-hjk-Sharma-Shalini-SL3-wt.22823.22823.2	2.5235	0.4693	100	1247.69	1247.69	1.1	835629	1	8.4425	4.46	63.2	1	K.YSLEPVAVELK.S
*	2016-11-16-hjk-Sharma-Shalini-SL3-wt.28097.28097.2	5.2537	0.5468	100	1768.94	1768.94	-0.1	2199723	1	14.8813	6.56	73.3	2	K.ACANPAAGSVILLENLR.F
	2016-11-16-hjk-Sharma-Shalini-SL3-wt.6162.6162.2	2.159	0.295	99.8	974.457	974.458	-0.3	7081887	1	8.14832	4.72	78.6	1	R.FHVEEEGK.G
	2016-11-16-hjk-Sharma-Shalini-SL3-wt.18848.18848.2	3.7485	0.5793	100	1634.79	1634.79	-0.4	2.74055e+06	1	11.9989	5.63	80	1	K.LGDVYVNDAFGTAHR.A
	2016-11-16-hjk-Sharma-Shalini-SL3-wt.18844.18844.3	2.5379	0.5589	100	1634.79	1634.79	-1	12388899	1	9.48854	5.63	34.1	1	K.LGDVYVNDAFGTAHR.A
*	2016-11-16-hjk-Sharma-Shalini-SL3-wt.12299.12299.2	4.0389	0.6344	100	1367.71	1367.71	-0.4	9618754	1	17.7456	9.08	85.7	1	R.AHSSMVGVNLPQK.A
*	2016-11-16-hjk-Sharma-Shalini-SL3-wt.15174.15174.2	1.932	0.3105	99.7	884.45	884.451	-1.4	2593979	1	7.00238	6.56	66.7	1	K.ELNYFAK.A
*	2016-11-16-hjk-Sharma-Shalini-SL3-wt.27205.27205.3	2.312	0.4356	99.9	1768.99	1769	-0.6	1.32307e+06	1	7.2438	6.56	34	2	K.ALESPERPFLAILGGAK.V
*	2016-11-16-hjk-Sharma-Shalini-SL3-wt.22827.22827.2	2.6669	0.1603	99.8	1201.66	1201.66	0.1	1.75484e+06	1	8.33167	6.56	61.1	1	K.IQLINNMLDK.V
*	2016-11-16-hjk-Sharma-Shalini-SL3-wt.26482.26482.2	2.6332	0.6164	100	1318.73	1318.73	0.5	1.35275e+06	1	13.0738	4.46	54.5	1	K.ITLPVDFVTADK.F
*	2016-11-16-hjk-Sharma-Shalini-SL3-wt.26408.26408.3	3.2792	0.5962	100	2023.04	2023.04	1.7	511822	1	10.7646	4.4	28.6	1	K.ITLPVDFVTADKFDENAK.T
*	2016-11-16-hjk-Sharma-Shalini-SL3-wt.23467.23467.3	4.8468	0.6415	100	2605.23	2605.24	-3	1.57924e+06	1	12.8045	6.56	24.7	1	K.TGQATVASGIPAGWMGLDCGPESSKK.Y
*	2016-11-16-hjk-Sharma-Shalini-SL3-wt.4358.4358.2	1.8063	0.3587	99.8	937.51	937.51	0.2	1.87156e+06	1	7.28223	8.8	64.3	1	K.KYAEAVTR.A
*	2016-11-16-hjk-Sharma-Shalini-SL3-wt.5486.5486.2	1.823	0.4055	99.9	809.415	809.415	-0.1	1.8611e+06	1	8.29409	6.56	66.7	1	K.YAEAVTR.A
*	2016-11-16-hjk-Sharma-Shalini-SL3-wt.16342.16342.2	1.6559	0.507	99.8	904.48	904.481	-1.2	3.0998e+06	1	7.50687	4.46	61.5	1	K.ALMDEVVK.A
*	2016-11-16-hjk-Sharma-Shalini-SL3-wt.16485.16485.2	4.5754	0.6957	100	1754.78	1754.79	-1.3	2452864	1	16.8383	5.69	64.3	1	R.GCITIIGGGDTATCCAK.W
P63104	17	19	0.429	245	27745	4.8	U	0.00387552	1.68534	14-3-3 protein zeta/delta OS=Homo sapiens GN=YWHAZ PE=1 SV=1	0	19	0
	2016-11-16-hjk-Sharma-Shalini-SL3-wt.3510.3510.2	2.0684	0.1479	99.2	816.422	816.421	1	1.01036e+06	1	6.57676	4.46	66.7	1	K.LAEQAER.Y
*	2016-11-16-hjk-Sharma-Shalini-SL3-wt.15713.15713.2	4.6086	0.6658	100	1901.82	1901.82	-1.6	4356928	1	10.1949	4.4	65.5	1	K.LAEQAERYDDMAACMK.S
*	2016-11-16-hjk-Sharma-Shalini-SL3-wt.15691.15691.3	2.9305	0.6765	100	1901.81	1901.82	-2.2	13527236	1	10.6342	4.4	33.3	1	K.LAEQAERYDDMAACMK.S
*	2016-11-16-hjk-Sharma-Shalini-SL3-wt.11468.11468.2	1.2658	0.8635	100	1104.42	1104.42	-0.1	15893808	1	3.99842	4.46	62.5	1	R.YDDMAACMK.S
*	2016-11-16-hjk-Sharma-Shalini-SL3-wt.10049.10049.2	4.8845	0.6111	100	1548.71	1548.71	-0.1	5.58227e+06	1	12.158	3.96	82.6	2	K.SVTEQGAELSNEER.N
	2016-11-16-hjk-Sharma-Shalini-SL3-wt.18610.18610.2	1.8252	0.2732	99.2	907.524	907.525	-1.3	7847973	1	7.16393	8.8	57.1	1	R.NLLSVAYK.N
*	2016-11-16-hjk-Sharma-Shalini-SL3-wt.5421.5421.2	1.9114	0.2996	99.7	889.499	889.499	0.3	2187839	1	7.54524	6.56	69.2	1	R.VVSSIEQK.T
*	2016-11-16-hjk-Sharma-Shalini-SL3-wt.17904.17904.2	1.9891	0.3971	99.8	1304.69	1304.68	1	5.01536e+06	1	7.25679	6.56	60	1	K.FLIPNASQAESK.V
	2016-11-16-hjk-Sharma-Shalini-SL3-wt.5300.5300.2	1.5365	0.369	99.6	932.429	932.429	-0.1	8492757	1	7.83687	8.64	58.3	1	K.MKGDYYR.Y
*	2016-11-16-hjk-Sharma-Shalini-SL3-wt.11351.11351.2	2.4256	0.5991	100	1151.56	1151.56	-1.7	1.99761e+06	1	11.3396	4.14	65	1	R.YLAEVAAGDDK.K
*	2016-11-16-hjk-Sharma-Shalini-SL3-wt.8199.8199.2	2.9713	0.4671	100	1279.65	1279.65	-1.8	17705072	1	9.60274	4.72	65	1	R.YLAEVAAGDDKK.G
*	2016-11-16-hjk-Sharma-Shalini-SL3-wt.8185.8185.3	2.0174	0.4689	99.6	1279.65	1279.65	-1.4	1.83225e+06	1	7.23983	4.72	27.8	1	R.YLAEVAAGDDKK.G
*	2016-11-16-hjk-Sharma-Shalini-SL3-wt.22170.22170.3	6.4676	0.599	100	2169.07	2169.08	-4.1	4.49291e+06	1	14.2134	4.72	50.9	1	K.KGIVDQSQQAYQEAFEISK.K
*	2016-11-16-hjk-Sharma-Shalini-SL3-wt.25214.25214.2	6.6121	0.6831	100	2040.99	2040.99	1.9	2.24345e+06	1	20.3992	4.14	75.9	2	K.GIVDQSQQAYQEAFEISK.K
*	2016-11-16-hjk-Sharma-Shalini-SL3-wt.23437.23437.2	6.1524	0.5315	100	2169.08	2169.08	-0.5	1.84258e+06	1	18.9283	4.72	71.9	1	K.GIVDQSQQAYQEAFEISKK.E
*	2016-11-16-hjk-Sharma-Shalini-SL3-wt.23415.23415.3	6.4311	0.6368	100	2169.08	2169.08	-2	4.09077e+06	1	14.6615	4.72	47.5	1	K.GIVDQSQQAYQEAFEISKK.E
	2016-11-16-hjk-Sharma-Shalini-SL3-wt.5616.5616.2	2.1363	0.4078	100	1108.56	1108.56	0.7	3.49629e+06	1	8.28074	7.33	64.3	1	K.EMQPTHPIR.L
P01040	3	4	0.429	98	11006	5.5	U	0.00203975	1.68534	Cystatin-A OS=Homo sapiens GN=CSTA PE=1 SV=1	0	4	0
*	2016-11-16-hjk-Sharma-Shalini-SL3-wt.19473.19473.2	2.3591	0.4151	99.8	1339.71	1339.71	-3	18713282	1	9.85643	4.14	61.9	1	K.PATPEIQEIVDK.V
*	2016-11-16-hjk-Sharma-Shalini-SL3-wt.16023.16023.2	2.9649	0.6063	100	1356.71	1356.72	-1.3	33572724	1	13.5878	8.64	54.5	1	K.TQVVAGTNYYIK.V
*	2016-11-16-hjk-Sharma-Shalini-SL3-wt.22839.22839.2	4.6224	0.6104	100	1976	1976	0.2	4.04296e+06	1	14.1179	4.14	64.5	2	K.SLPGQNEDLVLTGYQVDK.N
Q9BQE3	20	31	0.425	449	49895	5.1	U	0.00345031	1.66073	Tubulin alpha-1C chain OS=Homo sapiens GN=TUBA1C PE=1 SV=1	0	31	0
	2016-11-16-hjk-Sharma-Shalini-SL3-wt.26271.26271.2	4.9395	0.7924	100	2007.88	2007.89	-6.1	1.28059e+06	1	16.9722	4.14	45.7	1	K.TIGGGDDSFNTFFSETGAGK.H
	2016-11-16-hjk-Sharma-Shalini-SL3-wt.28232.28232.2	5.6226	0.5462	100	1702.91	1701.91	0.8	12986799	1	11.0383	3.96	69.2	3	R.AVFVDLEPTVIDEVR.T
	2016-11-16-hjk-Sharma-Shalini-SL3-wt.19984.19984.3	5.3803	0.4647	100	2415.2	2415.2	-1.1	4.04935e+06	1	11.2064	5.8	41.3	1	R.QLFHPEQLITGKEDAANNYAR.G
	2016-11-16-hjk-Sharma-Shalini-SL3-wt.20041.20041.4	2.9862	0.3405	99.6	2415.21	2415.2	1.7	3.65818e+06	1	5.85996	5.8	22.7	1	R.QLFHPEQLITGKEDAANNYAR.G
	2016-11-16-hjk-Sharma-Shalini-SL3-wt.4702.4702.2	2.8015	0.5106	100	1023.45	1023.45	-2.7	1.20973e+06	1	10.408	4.46	62.5	1	K.EDAANNYAR.G
	2016-11-16-hjk-Sharma-Shalini-SL3-wt.26742.26742.2	2.2685	0.4353	100	1085.62	1085.62	-0.2	1.5527e+06	1	9.26915	4.14	64.3	2	K.EIIDLVLDR.I
	2016-11-16-hjk-Sharma-Shalini-SL3-wt.6877.6877.2	1.9016	0.5111	100	909.503	909.504	-1.3	4.97864e+06	1	9.44467	8.64	57.1	1	R.LSVDYGKK.S
	2016-11-16-hjk-Sharma-Shalini-SL3-wt.13585.13585.3	3.4512	0.5219	99.9	1874.98	1874.98	-3.3	3116893	1	8.07361	9.08	40.7	1	R.RNLDIERPTYTNLNR.L
	2016-11-16-hjk-Sharma-Shalini-SL3-wt.16597.16597.2	2.7695	0.2767	99.7	1718.88	1718.88	-2.3	5140622	1	6.02637	6.56	44	1	R.NLDIERPTYTNLNR.L
	2016-11-16-hjk-Sharma-Shalini-SL3-wt.25379.25379.2	4.4793	0.7272	100	1756.96	1756.96	0.2	2.19551e+06	1	16.4939	7.33	71.4	4	R.IHFPLATYAPVISAEK.A
	2016-11-16-hjk-Sharma-Shalini-SL3-wt.25274.25274.3	3.3162	0.6005	100	1756.96	1756.96	0.5	2.44695e+06	1	11.2584	7.33	31	5	R.IHFPLATYAPVISAEK.A
	2016-11-16-hjk-Sharma-Shalini-SL3-wt.20382.20382.2	2.0618	0.5716	100	1249.55	1249.55	-0.4	10822516	1	11.3372	8	62.5	1	K.YMACCLLYR.G
	2016-11-16-hjk-Sharma-Shalini-SL3-wt.17117.17117.2	2.3439	0.4411	100	1015.58	1015.58	1.5	5.91423e+06	1	9.51501	6.56	66.7	1	K.DVNAAIATIK.T
	2016-11-16-hjk-Sharma-Shalini-SL3-wt.24521.24521.3	3.5755	0.5389	100	1754.87	1754.87	-0.3	2.83229e+06	1	11.3489	8.26	46.3	1	K.RTIQFVDWCPTGFK.V
	2016-11-16-hjk-Sharma-Shalini-SL3-wt.27621.27621.2	3.6171	0.5651	100	1598.77	1598.77	-0.3	1.34628e+06	1	12.8704	6.56	72.7	1	R.TIQFVDWCPTGFK.V
	2016-11-16-hjk-Sharma-Shalini-SL3-wt.21958.21958.2	3.5318	0.5699	100	1825.98	1824.99	-5.2	2.9366e+06	1	10.5843	6.56	64.3	2	K.VGINYQPPTVVPGGDLAK.V
*	2016-11-16-hjk-Sharma-Shalini-SL3-wt.26523.26523.2	5.0219	0.6696	100	1851.89	1850.89	-2.5	1256801	1	13.4926	6.56	70.4	1	R.AVCMLSNTTAVAEAWAR.L
	2016-11-16-hjk-Sharma-Shalini-SL3-wt.15818.15818.3	2.7605	0.4286	99.9	1381.7	1380.7	-1.5	3.3025e+06	1	7.68811	7.25	39.5	1	R.LDHKFDLMYAK.R
	2016-11-16-hjk-Sharma-Shalini-SL3-wt.19657.19657.2	1.7948	0.3679	99.8	887.434	887.433	0.8	2.3516e+06	1	6.88047	6.56	66.7	1	K.FDLMYAK.R
	2016-11-16-hjk-Sharma-Shalini-SL3-wt.10316.10316.2	1.8095	0.4192	99.9	906.423	906.424	-0.3	3.48943e+06	1	6.85416	4.14	57.1	1	R.EDMAALEK.D
P08107	26	38	0.424	641	70052	5.6	U	0.00296256	1.65461	Heat shock 70 kDa protein 1A/1B OS=Homo sapiens GN=HSPA1A PE=1 SV=5	0	38	0
	2016-11-16-hjk-Sharma-Shalini-SL3-wt.18328.18328.2	3.0852	0.6449	100	1487.7	1487.7	-0.9	3.92852e+06	1	12.3086	4.46	63.6	2	R.TTPSYVAFTDTER.L
*	2016-11-16-hjk-Sharma-Shalini-SL3-wt.19366.19366.2	4.2149	0.5923	100	1658.85	1658.85	-0.4	22684022	1	13.389	6.56	69.2	2	K.NQVALNPQNTVFDAK.R
*	2016-11-16-hjk-Sharma-Shalini-SL3-wt.12277.12277.2	4.4481	0.5965	100	1350.67	1350.67	-1.5	4.50578e+06	1	9.43872	6.56	86.4	1	R.KFGDPVVQSDMK.H
*	2016-11-16-hjk-Sharma-Shalini-SL3-wt.15022.15022.2	3.0404	0.5652	100	1222.58	1222.58	-1.6	14785104	1	10.7364	4.46	75	1	K.FGDPVVQSDMK.H
*	2016-11-16-hjk-Sharma-Shalini-SL3-wt.18504.18504.3	4.0341	0.6221	100	1680.85	1680.85	-0.9	6435448	1	12.7954	7.33	52.5	3	K.HWPFQVINDGDKPK.V
	2016-11-16-hjk-Sharma-Shalini-SL3-wt.28383.28383.2	2.973	0.5428	100	1614.81	1614.81	-1.5	2.89551e+06	1	14.0254	4.46	56.5	3	K.AFYPEEISSMVLTK.M
	2016-11-16-hjk-Sharma-Shalini-SL3-wt.25678.25678.2	2.845	0.5031	100	1197.69	1197.69	-0.3	9431228	1	10.1288	6.56	63.6	2	K.DAGVIAGLNVLR.I
	2016-11-16-hjk-Sharma-Shalini-SL3-wt.25002.25002.2	4.4748	0.5923	100	1687.9	1687.9	-1.4	2712968	1	13.3988	4.46	63.3	1	R.IINEPTAAAIAYGLDR.T
	2016-11-16-hjk-Sharma-Shalini-SL3-wt.10820.10820.2	5.1506	0.7674	100	1675.73	1675.73	-1.4	7.47363e+06	1	17.215	4.4	85.2	1	K.ATAGDTHLGGEDFDNR.L
	2016-11-16-hjk-Sharma-Shalini-SL3-wt.10858.10858.3	2.8569	0.595	100	1675.73	1675.73	-1.7	101511760	1	8.92343	4.4	33.3	2	K.ATAGDTHLGGEDFDNR.L
*	2016-11-16-hjk-Sharma-Shalini-SL3-wt.17654.17654.2	3.8744	0.5625	100	1261.66	1261.66	-1.1	3.27614e+06	1	10.1631	5.63	94.4	1	R.LVNHFVEEFK.R
	2016-11-16-hjk-Sharma-Shalini-SL3-wt.23347.23347.2	3.6665	0.55	100	1542.74	1542.74	-0.5	4.7115e+06	1	8.91375	4.72	80	1	R.ARFEELCSDLFR.S
	2016-11-16-hjk-Sharma-Shalini-SL3-wt.23345.23345.3	1.9778	0.5163	99.3	1542.73	1542.74	-2.1	1.25931e+06	1	7.59262	4.72	27	1	R.ARFEELCSDLFR.S
	2016-11-16-hjk-Sharma-Shalini-SL3-wt.24586.24586.2	2.8987	0.632	100	1315.6	1315.6	-1.6	3082909	1	9.46947	4.14	66.7	1	R.FEELCSDLFR.S
*	2016-11-16-hjk-Sharma-Shalini-SL3-wt.17220.17220.2	4.0466	0.6606	100	1465.81	1465.81	-1.4	7.43252e+06	1	16.4236	7.33	76	1	K.AQIHDLVLVGGSTR.I
*	2016-11-16-hjk-Sharma-Shalini-SL3-wt.17246.17246.3	2.545	0.3697	99.9	1465.81	1465.81	0.7	34208536	1	8.23519	7.33	31.2	1	K.AQIHDLVLVGGSTR.I
*	2016-11-16-hjk-Sharma-Shalini-SL3-wt.24003.24003.2	2.2929	0.4468	100	1109.57	1109.57	0.3	3058822	1	9.75407	6.56	62.5	2	K.LLQDFFNGR.D
	2016-11-16-hjk-Sharma-Shalini-SL3-wt.28193.28193.2	3.6139	0.6837	100	2786.37	2786.36	3.7	329878	1	16.435	4.14	37.5	2	K.QTQIFTTYSDNQPGVLIQVYEGER.A
	2016-11-16-hjk-Sharma-Shalini-SL3-wt.10385.10385.2	1.606	0.4358	99.8	801.421	801.421	-0.5	3.47215e+06	1	6.93605	6.56	66.7	1	K.DNNLLGR.F
	2016-11-16-hjk-Sharma-Shalini-SL3-wt.4839.4839.2	2.1835	0.4716	100	1137.55	1137.55	0.4	11124648	1	9.48169	4.72	75	1	K.YKAEDEVQR.E
*	2016-11-16-hjk-Sharma-Shalini-SL3-wt.4864.4864.3	1.9861	0.4223	99.9	1422.7	1422.7	-0.1	8886989	1	6.96562	4.89	30.3	1	K.YKAEDEVQRER.V
	2016-11-16-hjk-Sharma-Shalini-SL3-wt.22163.22163.2	3.036	0.5507	100	1287.6	1287.6	-1.3	25173208	1	17.0454	6.56	65	2	K.NALESYAFNMK.S
*	2016-11-16-hjk-Sharma-Shalini-SL3-wt.7326.7326.2	2.276	0.4493	100	947.466	947.468	-1.6	4.73264e+06	1	9.1228	4.14	73.3	1	K.SAVEDEGLK.G
*	2016-11-16-hjk-Sharma-Shalini-SL3-wt.27682.27682.2	3.6682	0.4807	100	1876.91	1876.91	1	821512	1	10.7671	4.14	53.6	1	K.CQEVISWLDANTLAEK.D
*	2016-11-16-hjk-Sharma-Shalini-SL3-wt.26082.26082.4	4.4604	0.5688	100	2663.25	2662.25	-0.9	1.52212e+06	1	11.7932	4.42	28.3	1	K.CQEVISWLDANTLAEKDEFEHK.R
*	2016-11-16-hjk-Sharma-Shalini-SL3-wt.28331.28331.2	7.0341	0.7505	100	3055.5	3055.49	0.7	1.04189e+06	1	21.1533	4.46	40	2	K.ELEQVCNPIISGLYQGAGGPGPGGFGAQGPK.G
P68363	21	32	0.424	451	50152	5.1	U	0.00354581	1.65461	Tubulin alpha-1B chain OS=Homo sapiens GN=TUBA1B PE=1 SV=1	0	32	0
	2016-11-16-hjk-Sharma-Shalini-SL3-wt.26271.26271.2	4.9395	0.7924	100	2007.88	2007.89	-6.1	1.28059e+06	1	16.9722	4.14	45.7	1	K.TIGGGDDSFNTFFSETGAGK.H
	2016-11-16-hjk-Sharma-Shalini-SL3-wt.28232.28232.2	5.6226	0.5462	100	1702.91	1701.91	0.8	12986799	1	11.0383	3.96	69.2	3	R.AVFVDLEPTVIDEVR.T
	2016-11-16-hjk-Sharma-Shalini-SL3-wt.19984.19984.3	5.3803	0.4647	100	2415.2	2415.2	-1.1	4.04935e+06	1	11.2064	5.8	41.3	1	R.QLFHPEQLITGKEDAANNYAR.G
	2016-11-16-hjk-Sharma-Shalini-SL3-wt.20041.20041.4	2.9862	0.3405	99.6	2415.21	2415.2	1.7	3.65818e+06	1	5.85996	5.8	22.7	1	R.QLFHPEQLITGKEDAANNYAR.G
	2016-11-16-hjk-Sharma-Shalini-SL3-wt.4702.4702.2	2.8015	0.5106	100	1023.45	1023.45	-2.7	1.20973e+06	1	10.408	4.46	62.5	1	K.EDAANNYAR.G
	2016-11-16-hjk-Sharma-Shalini-SL3-wt.26742.26742.2	2.2685	0.4353	100	1085.62	1085.62	-0.2	1.5527e+06	1	9.26915	4.14	64.3	2	K.EIIDLVLDR.I
	2016-11-16-hjk-Sharma-Shalini-SL3-wt.6877.6877.2	1.9016	0.5111	100	909.503	909.504	-1.3	4.97864e+06	1	9.44467	8.64	57.1	1	R.LSVDYGKK.S
	2016-11-16-hjk-Sharma-Shalini-SL3-wt.13585.13585.3	3.4512	0.5219	99.9	1874.98	1874.98	-3.3	3116893	1	8.07361	9.08	40.7	1	R.RNLDIERPTYTNLNR.L
	2016-11-16-hjk-Sharma-Shalini-SL3-wt.16597.16597.2	2.7695	0.2767	99.7	1718.88	1718.88	-2.3	5140622	1	6.02637	6.56	44	1	R.NLDIERPTYTNLNR.L
	2016-11-16-hjk-Sharma-Shalini-SL3-wt.25379.25379.2	4.4793	0.7272	100	1756.96	1756.96	0.2	2.19551e+06	1	16.4939	7.33	71.4	4	R.IHFPLATYAPVISAEK.A
	2016-11-16-hjk-Sharma-Shalini-SL3-wt.25274.25274.3	3.3162	0.6005	100	1756.96	1756.96	0.5	2.44695e+06	1	11.2584	7.33	31	5	R.IHFPLATYAPVISAEK.A
	2016-11-16-hjk-Sharma-Shalini-SL3-wt.20382.20382.2	2.0618	0.5716	100	1249.55	1249.55	-0.4	10822516	1	11.3372	8	62.5	1	K.YMACCLLYR.G
	2016-11-16-hjk-Sharma-Shalini-SL3-wt.17117.17117.2	2.3439	0.4411	100	1015.58	1015.58	1.5	5.91423e+06	1	9.51501	6.56	66.7	1	K.DVNAAIATIK.T
	2016-11-16-hjk-Sharma-Shalini-SL3-wt.24252.24252.2	2.7614	0.1741	99.7	1740.85	1740.85	-0.3	1.89601e+06	1	6.00152	8.26	53.8	1	K.RSIQFVDWCPTGFK.V
	2016-11-16-hjk-Sharma-Shalini-SL3-wt.24230.24230.3	3.97	0.6297	100	1740.85	1740.85	-2.5	2220071	1	12.3864	8.26	56.1	1	K.RSIQFVDWCPTGFK.V
	2016-11-16-hjk-Sharma-Shalini-SL3-wt.27436.27436.2	3.5222	0.636	100	1584.75	1584.75	-0.4	1159020	1	13.2581	6.56	66.7	1	R.SIQFVDWCPTGFK.V
	2016-11-16-hjk-Sharma-Shalini-SL3-wt.21958.21958.2	3.5318	0.5699	100	1825.98	1824.99	-5.2	2.9366e+06	1	10.5843	6.56	64.3	2	K.VGINYQPPTVVPGGDLAK.V
	2016-11-16-hjk-Sharma-Shalini-SL3-wt.28403.28403.2	4.1293	0.6539	100	1864.9	1864.9	-2.6	515046	1	11.7464	6.56	60.7	1	R.AVCMLSNTTAIAEAWAR.L
	2016-11-16-hjk-Sharma-Shalini-SL3-wt.15818.15818.3	2.7605	0.4286	99.9	1381.7	1380.7	-1.5	3.3025e+06	1	7.68811	7.25	39.5	1	R.LDHKFDLMYAK.R
	2016-11-16-hjk-Sharma-Shalini-SL3-wt.19657.19657.2	1.7948	0.3679	99.8	887.434	887.433	0.8	2.3516e+06	1	6.88047	6.56	66.7	1	K.FDLMYAK.R
	2016-11-16-hjk-Sharma-Shalini-SL3-wt.10316.10316.2	1.8095	0.4192	99.9	906.423	906.424	-0.3	3.48943e+06	1	6.85416	4.14	57.1	1	R.EDMAALEK.D
Q71U36	20	31	0.424	451	50136	5.1	U	0.003435	1.65461	Tubulin alpha-1A chain OS=Homo sapiens GN=TUBA1A PE=1 SV=1	0	31	0
	2016-11-16-hjk-Sharma-Shalini-SL3-wt.26271.26271.2	4.9395	0.7924	100	2007.88	2007.89	-6.1	1.28059e+06	1	16.9722	4.14	45.7	1	K.TIGGGDDSFNTFFSETGAGK.H
	2016-11-16-hjk-Sharma-Shalini-SL3-wt.28232.28232.2	5.6226	0.5462	100	1702.91	1701.91	0.8	12986799	1	11.0383	3.96	69.2	3	R.AVFVDLEPTVIDEVR.T
	2016-11-16-hjk-Sharma-Shalini-SL3-wt.19984.19984.3	5.3803	0.4647	100	2415.2	2415.2	-1.1	4.04935e+06	1	11.2064	5.8	41.3	1	R.QLFHPEQLITGKEDAANNYAR.G
	2016-11-16-hjk-Sharma-Shalini-SL3-wt.20041.20041.4	2.9862	0.3405	99.6	2415.21	2415.2	1.7	3.65818e+06	1	5.85996	5.8	22.7	1	R.QLFHPEQLITGKEDAANNYAR.G
	2016-11-16-hjk-Sharma-Shalini-SL3-wt.4702.4702.2	2.8015	0.5106	100	1023.45	1023.45	-2.7	1.20973e+06	1	10.408	4.46	62.5	1	K.EDAANNYAR.G
	2016-11-16-hjk-Sharma-Shalini-SL3-wt.26742.26742.2	2.2685	0.4353	100	1085.62	1085.62	-0.2	1.5527e+06	1	9.26915	4.14	64.3	2	K.EIIDLVLDR.I
	2016-11-16-hjk-Sharma-Shalini-SL3-wt.6877.6877.2	1.9016	0.5111	100	909.503	909.504	-1.3	4.97864e+06	1	9.44467	8.64	57.1	1	R.LSVDYGKK.S
	2016-11-16-hjk-Sharma-Shalini-SL3-wt.13585.13585.3	3.4512	0.5219	99.9	1874.98	1874.98	-3.3	3116893	1	8.07361	9.08	40.7	1	R.RNLDIERPTYTNLNR.L
	2016-11-16-hjk-Sharma-Shalini-SL3-wt.16597.16597.2	2.7695	0.2767	99.7	1718.88	1718.88	-2.3	5140622	1	6.02637	6.56	44	1	R.NLDIERPTYTNLNR.L
	2016-11-16-hjk-Sharma-Shalini-SL3-wt.25379.25379.2	4.4793	0.7272	100	1756.96	1756.96	0.2	2.19551e+06	1	16.4939	7.33	71.4	4	R.IHFPLATYAPVISAEK.A
	2016-11-16-hjk-Sharma-Shalini-SL3-wt.25274.25274.3	3.3162	0.6005	100	1756.96	1756.96	0.5	2.44695e+06	1	11.2584	7.33	31	5	R.IHFPLATYAPVISAEK.A
	2016-11-16-hjk-Sharma-Shalini-SL3-wt.20382.20382.2	2.0618	0.5716	100	1249.55	1249.55	-0.4	10822516	1	11.3372	8	62.5	1	K.YMACCLLYR.G
	2016-11-16-hjk-Sharma-Shalini-SL3-wt.17117.17117.2	2.3439	0.4411	100	1015.58	1015.58	1.5	5.91423e+06	1	9.51501	6.56	66.7	1	K.DVNAAIATIK.T
	2016-11-16-hjk-Sharma-Shalini-SL3-wt.24521.24521.3	3.5755	0.5389	100	1754.87	1754.87	-0.3	2.83229e+06	1	11.3489	8.26	46.3	1	K.RTIQFVDWCPTGFK.V
	2016-11-16-hjk-Sharma-Shalini-SL3-wt.27621.27621.2	3.6171	0.5651	100	1598.77	1598.77	-0.3	1.34628e+06	1	12.8704	6.56	72.7	1	R.TIQFVDWCPTGFK.V
	2016-11-16-hjk-Sharma-Shalini-SL3-wt.21958.21958.2	3.5318	0.5699	100	1825.98	1824.99	-5.2	2.9366e+06	1	10.5843	6.56	64.3	2	K.VGINYQPPTVVPGGDLAK.V
	2016-11-16-hjk-Sharma-Shalini-SL3-wt.28403.28403.2	4.1293	0.6539	100	1864.9	1864.9	-2.6	515046	1	11.7464	6.56	60.7	1	R.AVCMLSNTTAIAEAWAR.L
	2016-11-16-hjk-Sharma-Shalini-SL3-wt.15818.15818.3	2.7605	0.4286	99.9	1381.7	1380.7	-1.5	3.3025e+06	1	7.68811	7.25	39.5	1	R.LDHKFDLMYAK.R
	2016-11-16-hjk-Sharma-Shalini-SL3-wt.19657.19657.2	1.7948	0.3679	99.8	887.434	887.433	0.8	2.3516e+06	1	6.88047	6.56	66.7	1	K.FDLMYAK.R
	2016-11-16-hjk-Sharma-Shalini-SL3-wt.10316.10316.2	1.8095	0.4192	99.9	906.423	906.424	-0.3	3.48943e+06	1	6.85416	4.14	57.1	1	R.EDMAALEK.D
P62701	10	12	0.422	263	29598	10.2	U	0.00228017	1.64241	40S ribosomal protein S4, X isoform OS=Homo sapiens GN=RPS4X PE=1 SV=2	0	12	0
	2016-11-16-hjk-Sharma-Shalini-SL3-wt.10342.10342.3	2.2991	0.352	99.7	1564.86	1564.86	-0.2	3.15227e+06	1	6.63202	10.99	25	1	K.LTGVFAPRPSTGPHK.L
	2016-11-16-hjk-Sharma-Shalini-SL3-wt.11905.11905.2	1.9681	0.3751	99.7	995.503	995.504	-1.3	5971357	1	9.32918	4.46	60	2	K.YALTGDEVK.K
	2016-11-16-hjk-Sharma-Shalini-SL3-wt.8330.8330.2	2.3098	0.4238	100	1123.6	1123.6	-0.1	1.75336e+06	1	9.11332	6.56	76.5	1	K.YALTGDEVKK.I
*	2016-11-16-hjk-Sharma-Shalini-SL3-wt.28425.28425.3	4.3949	0.601	100	2141.1	2141.09	0.7	657202	1	9.9203	4.72	28.8	1	K.VRTDITYPAGFMDVISIDK.T
	2016-11-16-hjk-Sharma-Shalini-SL3-wt.8648.8648.3	2.2778	0.5404	99.9	1215.66	1215.66	-2.2	2.29043e+06	1	9.16865	7.41	44.4	2	K.GIPHLVTHDAR.T
	2016-11-16-hjk-Sharma-Shalini-SL3-wt.17709.17709.2	2.3819	0.1886	99.7	1215.71	1215.71	-0.3	1327983	1	4.31709	8.8	70.6	1	R.TIRYPDPLIK.V
*	2016-11-16-hjk-Sharma-Shalini-SL3-wt.20234.20234.2	3.573	0.5949	100	1445.75	1445.75	1.4	2.48356e+06	1	10.6844	4.14	60.9	1	K.VNDTIQIDLETGK.I
*	2016-11-16-hjk-Sharma-Shalini-SL3-wt.23170.23170.2	3.7237	0.5566	100	1782.82	1782.83	-1	1.88393e+06	1	10.6818	6.56	70	1	K.FDTGNLCMVTGGANLGR.I
*	2016-11-16-hjk-Sharma-Shalini-SL3-wt.23044.23044.2	2.333	0.5671	100	990.598	990.598	-0.4	3.68207e+06	1	10.8744	9.08	66.7	1	R.LSNIFVIGK.G
	2016-11-16-hjk-Sharma-Shalini-SL3-wt.22817.22817.2	1.56	0.4678	99.8	868.505	868.504	0.8	1.19801e+06	1	8.58391	10.06	63.6	1	K.PWISLPR.G
P61088	5	5	0.421	152	17138	6.6	U	0.00164387	1.63633	Ubiquitin-conjugating enzyme E2 N OS=Homo sapiens GN=UBE2N PE=1 SV=1	0	5	0
	2016-11-16-hjk-Sharma-Shalini-SL3-wt.18394.18394.2	1.6767	0.4623	99.8	1036.64	1036.64	0.6	1.53056e+06	1	9.53371	6.56	66.7	1	R.LLAEPVPGIK.A
*	2016-11-16-hjk-Sharma-Shalini-SL3-wt.25309.25309.3	3.3884	0.3924	99.9	2196.08	2196.08	2	1.49985e+06	1	8.35336	5.63	27.8	1	R.YFHVVIAGPQDSPFEGGTFK.L
*	2016-11-16-hjk-Sharma-Shalini-SL3-wt.28937.28937.2	2.5491	0.2875	99.7	1747.89	1747.9	-1.6	550746	1	7.38513	4.14	50	1	K.LELFLPEEYPMAAPK.V
	2016-11-16-hjk-Sharma-Shalini-SL3-wt.19686.19686.2	1.9307	0.2863	99.5	970.546	970.547	-1.2	2439092	1	8.25326	10.06	64.3	1	K.WSPALQIR.T
	2016-11-16-hjk-Sharma-Shalini-SL3-wt.9989.9989.2	2.7444	0.4585	100	1203.6	1203.6	-1.2	3.37015e+06	1	9.87839	4.46	75	1	K.TNEAQAIETAR.A
O14818	10	10	0.419	248	27887	8.5	U	0.00201507	1.62422	Proteasome subunit alpha type-7 OS=Homo sapiens GN=PSMA7 PE=1 SV=1	0	10	0
	2016-11-16-hjk-Sharma-Shalini-SL3-wt.26968.26968.3	3.9432	0.6154	100	2449.24	2449.24	-1.6	884022	1	11.6262	4.72	30.2	1	R.AITVFSPDGHLFQVEYAQEAVK.K
*	2016-11-16-hjk-Sharma-Shalini-SL3-wt.14883.14883.2	3.4216	0.3481	100	1184.7	1184.7	-1.5	8286977	1	7.47428	6.56	88.9	1	R.GRDIVVLGVEK.K
*	2016-11-16-hjk-Sharma-Shalini-SL3-wt.19959.19959.2	2.0575	0.4184	99.9	971.578	971.577	0.7	1.92421e+06	1	8.11259	4.46	78.6	1	R.DIVVLGVEK.K
	2016-11-16-hjk-Sharma-Shalini-SL3-wt.23988.23988.2	3.9426	0.5311	100	1634.86	1634.86	-0.2	5941388	1	11.9254	4.14	72	1	R.LTVEDPVTVEYITR.Y
	2016-11-16-hjk-Sharma-Shalini-SL3-wt.14252.14252.2	4.3799	0.6467	100	1666.79	1666.79	-0.4	2.26055e+06	1	11.5051	7.25	66.7	1	R.LYQTDPSGTYHAWK.A
	2016-11-16-hjk-Sharma-Shalini-SL3-wt.14234.14234.3	2.5179	0.6073	100	1666.79	1666.79	2	4051192	1	10.5722	7.25	22.9	1	R.LYQTDPSGTYHAWK.A
*	2016-11-16-hjk-Sharma-Shalini-SL3-wt.21135.21135.2	5.1754	0.6442	100	1740.81	1740.82	-2.5	6951250	1	14.0933	3.86	76	1	K.NYTDEAIETDDLTIK.L
	2016-11-16-hjk-Sharma-Shalini-SL3-wt.17365.17365.2	2.6113	0.492	100	1100.63	1100.63	-1.1	3.89398e+06	1	12.2056	6.56	68.4	1	K.ALLEVVQSGGK.N
*	2016-11-16-hjk-Sharma-Shalini-SL3-wt.19388.19388.2	1.9922	0.1832	99.3	945.519	945.519	0.6	1.86894e+06	1	7.22971	6.56	64.3	1	K.NIELAVMR.R
*	2016-11-16-hjk-Sharma-Shalini-SL3-wt.15710.15710.2	2.2134	0.2742	99.7	1084.59	1084.59	-1.1	10894140	1	6.74737	4.14	68.8	1	K.ILNPEEIEK.Y
P62424	14	15	0.417	266	29996	10.6	U	0.00281807	1.61216	60S ribosomal protein L7a OS=Homo sapiens GN=RPL7A PE=1 SV=2	0	15	0
*	2016-11-16-hjk-Sharma-Shalini-SL3-wt.5692.5692.2	2.8886	0.4934	100	979.629	979.63	-1.3	1.65579e+06	1	10.245	10.04	77.8	1	K.KVAPAPAVVK.K
*	2016-11-16-hjk-Sharma-Shalini-SL3-wt.7706.7706.2	1.6409	0.4308	99.7	851.534	851.535	-0.9	1.73558e+06	1	7.33771	9.08	73.3	2	K.VAPAPAVVK.K
*	2016-11-16-hjk-Sharma-Shalini-SL3-wt.13501.13501.2	2.1387	0.2893	99.8	1073.64	1073.64	-0.1	5594649	1	4.59933	8.8	87.5	1	K.KVVNPLFEK.R
*	2016-11-16-hjk-Sharma-Shalini-SL3-wt.17780.17780.2	1.927	0.4955	100	945.541	945.54	0.6	2.98598e+06	1	10.3807	6.56	69.2	1	K.VVNPLFEK.R
*	2016-11-16-hjk-Sharma-Shalini-SL3-wt.17353.17353.2	2.2674	0.4847	100	1216.63	1216.63	-1.3	3.43444e+06	1	7.75766	6.56	60	1	K.NFGIGQDIQPK.R
*	2016-11-16-hjk-Sharma-Shalini-SL3-wt.25741.25741.2	3.0078	0.4981	100	1569.84	1569.84	1	1.62565e+06	1	11.4514	6.56	60.9	1	K.VPPAINQFTQALDR.Q
*	2016-11-16-hjk-Sharma-Shalini-SL3-wt.10838.10838.2	2.5874	0.3541	100	902.53	902.53	-0.5	8499615	1	6.02556	9.08	78.6	1	R.QTATQLLK.L
*	2016-11-16-hjk-Sharma-Shalini-SL3-wt.18470.18470.2	2.6418	0.5024	100	1345.73	1345.73	-2.6	4675712	1	7.86291	6.56	60.9	1	R.AGVNTVTTLVENK.K
*	2016-11-16-hjk-Sharma-Shalini-SL3-wt.15244.15244.3	2.0919	0.3758	99.6	1473.83	1473.83	-0.7	1.24002e+06	1	6.12416	8.8	22.9	1	R.AGVNTVTTLVENKK.A
*	2016-11-16-hjk-Sharma-Shalini-SL3-wt.21311.21311.2	1.8059	0.426	99.8	1080.56	1080.56	0.8	2375461	1	6.65662	8.26	62.5	1	K.MGVPYCIIK.G
*	2016-11-16-hjk-Sharma-Shalini-SL3-wt.14861.14861.2	4.4212	0.6427	100	1700.78	1700.78	-2.5	4.0192e+06	1	11.7044	4.46	73.1	1	K.TCTTVAFTQVNSEDK.G
*	2016-11-16-hjk-Sharma-Shalini-SL3-wt.10129.10129.2	2.3392	0.4351	100	1458.66	1458.66	-0.4	1.34026e+06	1	8.61413	4.72	55.6	1	R.TNYNDRYDEIR.R
*	2016-11-16-hjk-Sharma-Shalini-SL3-wt.10126.10126.3	2.1486	0.4411	99.8	1458.66	1458.66	-0.9	1.73922e+06	1	7.16188	4.72	36.4	1	R.TNYNDRYDEIR.R
*	2016-11-16-hjk-Sharma-Shalini-SL3-wt.11677.11677.2	2.7181	0.6109	100	1064.56	1064.56	-0.2	3.13444e+06	1	14.3678	9.08	83.3	1	R.HWGGNVLGPK.S
O15511	6	6	0.417	151	16320	5.7	U	0.00198571	1.61216	Actin-related protein 2/3 complex subunit 5 OS=Homo sapiens GN=ARPC5 PE=1 SV=3	0	6	0
*	2016-11-16-hjk-Sharma-Shalini-SL3-wt.7730.7730.2	4.2429	0.7177	100	1353.61	1353.62	-1.8	690912	1	15.2324	4.25	90	1	R.KVDVDEYDENK.F
*	2016-11-16-hjk-Sharma-Shalini-SL3-wt.10127.10127.2	3.0392	0.7125	100	1225.52	1225.52	-3.3	1.18843e+06	1	11.9642	3.86	76.5	1	K.VDVDEYDENK.F
*	2016-11-16-hjk-Sharma-Shalini-SL3-wt.22932.22932.2	3.0304	0.4457	100	1316.7	1316.7	-0.4	2.95083e+06	1	8.46065	9.08	62.5	1	R.QGNMTAALQAALK.N
	2016-11-16-hjk-Sharma-Shalini-SL3-wt.18617.18617.2	2.0265	0.2392	99.3	889.48	889.481	-1.9	1.85749e+06	1	7.56194	6.56	71.4	1	K.NGVDLLMK.Y
*	2016-11-16-hjk-Sharma-Shalini-SL3-wt.22859.22859.3	4.7906	0.7242	100	2162.98	2162.98	1.2	1.43607e+06	1	16.7449	4.72	29	1	K.GFESPSDNSSAMLLQWHEK.A
*	2016-11-16-hjk-Sharma-Shalini-SL3-wt.16351.16351.2	2.4566	0.4195	99.9	1070.63	1070.63	-2.1	6980945	1	9.78094	10.06	63.2	1	K.ALAAGGVGSIVR.V
P27695	17	23	0.415	318	35554	8.1	U	0.00361446	1.60016	DNA-(apurinic or apyrimidinic site) lyase OS=Homo sapiens GN=APEX1 PE=1 SV=2	0	23	0
*	2016-11-16-hjk-Sharma-Shalini-SL3-wt.7775.7775.3	5.3768	0.559	100	1914.94	1914.94	-1.4	7210773	1	10.0661	4.42	41.7	1	K.KGAVAEDGDELRTEPEAK.K
*	2016-11-16-hjk-Sharma-Shalini-SL3-wt.6287.6287.3	4.1317	0.4556	100	2043.03	2043.04	-1	2206568	1	7.60288	4.73	42.1	1	K.KGAVAEDGDELRTEPEAKK.S
*	2016-11-16-hjk-Sharma-Shalini-SL3-wt.6257.6257.4	2.4965	0.2929	99.7	2043.04	2043.04	0.1	1.9694e+06	1	6.5053	4.73	21	1	K.KGAVAEDGDELRTEPEAKK.S
*	2016-11-16-hjk-Sharma-Shalini-SL3-wt.9065.9065.2	2.1321	0.4359	99.9	1131.53	1131.53	0.8	3121260	1	9.97709	3.96	61.1	1	K.GAVAEDGDELR.T
*	2016-11-16-hjk-Sharma-Shalini-SL3-wt.9770.9770.2	7.1897	0.6148	100	1786.84	1786.85	-1.4	5.54263e+06	1	12.9671	4.12	83.3	2	K.GAVAEDGDELRTEPEAK.K
*	2016-11-16-hjk-Sharma-Shalini-SL3-wt.9755.9755.3	3.5878	0.2891	99.7	1786.85	1786.85	2.3	4519591	1	8.47322	4.12	35.8	2	K.GAVAEDGDELRTEPEAK.K
*	2016-11-16-hjk-Sharma-Shalini-SL3-wt.13950.13950.2	5.5978	0.7068	100	1786.81	1786.81	-1.8	2750138	1	16.3423	3.86	86.2	2	K.EAAGEGPALYEDPPDQK.T
*	2016-11-16-hjk-Sharma-Shalini-SL3-wt.3635.3635.2	1.87	0.435	99.8	1086.61	1086.62	-0.4	1.85202e+06	1	7.9345	10.04	55	1	K.TSPSGKPATLK.I
*	2016-11-16-hjk-Sharma-Shalini-SL3-wt.20163.20163.2	2.4294	0.5124	100	1219.59	1219.59	-0.1	2.92005e+06	1	8.83999	6.56	55.6	2	K.ICSWNVDGLR.A
*	2016-11-16-hjk-Sharma-Shalini-SL3-wt.21728.21728.2	3.6646	0.6424	100	1545.74	1545.75	-4.4	3.74992e+06	1	12.9964	3.96	68.2	2	K.EEAPDILCLQETK.C
*	2016-11-16-hjk-Sharma-Shalini-SL3-wt.25810.25810.3	5.6632	0.6938	100	3084.47	3084.47	0.3	1.18807e+06	1	14.5868	4.89	29.6	1	K.CSENKLPAELQELPGLSHQYWSAPSDK.E
*	2016-11-16-hjk-Sharma-Shalini-SL3-wt.25771.25771.4	4.5167	0.4478	100	3084.47	3084.47	-2.4	1.1719e+06	1	9.9142	4.89	20.3	1	K.CSENKLPAELQELPGLSHQYWSAPSDK.E
*	2016-11-16-hjk-Sharma-Shalini-SL3-wt.26611.26611.3	7.1059	0.6749	100	2466.23	2466.23	-0.9	9683947	1	16.0922	4.72	48.5	2	K.LPAELQELPGLSHQYWSAPSDK.E
*	2016-11-16-hjk-Sharma-Shalini-SL3-wt.18587.18587.2	2.3753	0.3433	99.8	1137.59	1137.59	-1.8	11590081	1	9.61807	6.56	60	1	K.EGYSGVGLLSR.Q
*	2016-11-16-hjk-Sharma-Shalini-SL3-wt.9942.9942.2	4.9359	0.7666	100	1690.72	1690.73	-5.1	3.83415e+06	1	17.1417	4.25	74.1	1	K.VSYGIGDEEHDQEGR.V
*	2016-11-16-hjk-Sharma-Shalini-SL3-wt.10055.10055.3	2.204	0.3619	99.7	1690.73	1690.73	-0.4	1.08319e+06	1	5.3176	4.25	31.8	1	K.VSYGIGDEEHDQEGR.V
*	2016-11-16-hjk-Sharma-Shalini-SL3-wt.11078.11078.3	2.8643	0.3332	100	1235.63	1235.63	-0.5	2529652	1	6.10958	9.08	46.7	1	R.QRWDEAFRK.F
P84103	8	12	0.415	164	19330	11.6	U	0.00365662	1.60016	Splicing factor, arginine/serine-rich 3 OS=Homo sapiens GN=SFRS3 PE=1 SV=1	0	12	0
*	2016-11-16-hjk-Sharma-Shalini-SL3-wt.10485.10485.2	2.4176	0.4773	100	1248.63	1248.63	-1.5	9258819	1	9.07232	8.8	61.9	1	K.VYVGNLGNNGNK.T
*	2016-11-16-hjk-Sharma-Shalini-SL3-wt.12970.12970.3	2.8027	0.3516	99.6	1876.95	1876.95	1.8	5.44553e+06	1	7.31731	6.56	27.9	1	K.VYVGNLGNNGNKTELER.A
*	2016-11-16-hjk-Sharma-Shalini-SL3-wt.20086.20086.2	1.9066	0.5357	100	1043.53	1043.53	1.4	2.98553e+06	1	11.3605	8.8	66.7	2	R.AFGYYGPLR.S
	2016-11-16-hjk-Sharma-Shalini-SL3-wt.27392.27392.2	3.6227	0.6355	100	1621.76	1621.76	-1.4	1421351	1	17.053	4.14	62.5	2	R.NPPGFAFVEFEDPR.D
*	2016-11-16-hjk-Sharma-Shalini-SL3-wt.27082.27082.2	2.0157	0.3887	99.3	2320.11	2320.1	2.7	841042	1	8.70985	4.25	17.9	1	R.NPPGFAFVEFEDPRDAADAVR.E
*	2016-11-16-hjk-Sharma-Shalini-SL3-wt.27004.27004.3	3.5132	0.6275	100	2320.09	2320.1	-2	7840705	1	14.8134	4.25	27.9	2	R.NPPGFAFVEFEDPRDAADAVR.E
*	2016-11-16-hjk-Sharma-Shalini-SL3-wt.5498.5498.3	3.2221	0.3505	100	1286.72	1286.72	0.1	1609630	1	7.41971	9.08	60	1	R.VRVELSNGEKR.S
*	2016-11-16-hjk-Sharma-Shalini-SL3-wt.6816.6816.2	2.5294	0.4135	99.9	1124.58	1123.58	-2.7	1.76445e+06	1	7.68537	12	72.2	2	R.NRGPPPSWGR.R
P06733	15	19	0.41	434	47169	7.4	U	0.00218779	1.5704	Alpha-enolase OS=Homo sapiens GN=ENO1 PE=1 SV=2	0	19	0
*	2016-11-16-hjk-Sharma-Shalini-SL3-wt.22953.22953.2	3.2488	0.1138	99.8	1406.72	1406.72	-0.3	2.20791e+06	1	12.2065	4.46	61.9	2	R.GNPTVEVDLFTSK.G
	2016-11-16-hjk-Sharma-Shalini-SL3-wt.26528.26528.2	5.3841	0.6842	100	1804.94	1804.94	-0.6	1.9808e+06	1	15.5902	4.46	63.3	2	R.AAVPSGASTGIYEALELR.D
*	2016-11-16-hjk-Sharma-Shalini-SL3-wt.23164.23164.3	5.4612	0.6773	100	2277.14	2277.14	0	3852541	1	12.6765	4.4	37.7	1	R.AAVPSGASTGIYEALELRDNDK.T
*	2016-11-16-hjk-Sharma-Shalini-SL3-wt.2615.2615.2	2.0077	0.2253	99.5	810.446	810.447	-1.1	899828	1	9.77388	7.33	90.9	1	K.AVEHINK.T
*	2016-11-16-hjk-Sharma-Shalini-SL3-wt.4672.4672.2	3.1955	0.3436	100	1088.59	1088.59	-1.3	3.74758e+06	1	6.88667	6.56	100	1	K.KLNVTEQEK.I
*	2016-11-16-hjk-Sharma-Shalini-SL3-wt.17144.17144.2	3.2724	0.6466	100	1280.58	1280.59	-1.5	3848624	1	12.1135	4.14	65	2	K.LMIEMDGTENK.S
*	2016-11-16-hjk-Sharma-Shalini-SL3-wt.27320.27320.4	5.2106	0.5386	100	3011.57	3011.57	-1.3	2.55809e+06	1	10.8496	6.51	27.3	1	R.HIADLAGNSEVILPVPAFNVINGGSHAGNK.L
*	2016-11-16-hjk-Sharma-Shalini-SL3-wt.10652.10652.2	2.7704	0.438	100	1143.62	1143.62	2	2.34145e+06	1	9.8666	7.33	66.7	1	R.IGAEVYHNLK.N
*	2016-11-16-hjk-Sharma-Shalini-SL3-wt.23241.23241.2	5.9428	0.7238	100	1960.92	1960.92	-0.4	3.43815e+06	1	15.7777	3.96	84.4	1	K.DATNVGDEGGFAPNILENK.E
*	2016-11-16-hjk-Sharma-Shalini-SL3-wt.13621.13621.2	2.3562	0.6578	100	1072.53	1072.53	-0.8	8080304	1	12.5992	6.56	85.7	1	R.SGKYDLDFK.S
*	2016-11-16-hjk-Sharma-Shalini-SL3-wt.24958.24958.2	3.2264	0.6485	100	1425.73	1425.73	1.6	2127708	1	12.5332	4.46	59.1	2	R.YISPDQLADLYK.S
*	2016-11-16-hjk-Sharma-Shalini-SL3-wt.14582.14582.2	1.52	0.3939	99.2	1007.5	1007.5	-1.6	20255930	1	6.23692	8.04	69.2	1	K.SCNCLLLK.V
*	2016-11-16-hjk-Sharma-Shalini-SL3-wt.17261.17261.3	4.227	0.5188	100	1525.77	1525.77	0.2	2754063	1	10.214	10.06	63	1	K.LAQANGWGVMVSHR.S
	2016-11-16-hjk-Sharma-Shalini-SL3-wt.10819.10819.2	1.6491	0.4602	99.7	806.45	806.452	-1.8	25827566	1	7.42639	9.08	70	1	K.YNQLLR.I
*	2016-11-16-hjk-Sharma-Shalini-SL3-wt.11973.11973.2	2.1466	0.2074	99.7	959.542	959.542	0.1	3.88568e+06	1	5.54953	10.99	61.5	1	R.NFRNPLAK.-
P63220	4	4	0.41	83	9111	8.5	U	0.00240837	1.5704	40S ribosomal protein S21 OS=Homo sapiens GN=RPS21 PE=1 SV=1	0	4	0
*	2016-11-16-hjk-Sharma-Shalini-SL3-wt.14885.14885.2	6.3888	0.6547	100	1556.73	1556.74	-1.8	9139756	1	14.3512	4.72	88	1	K.DHASIQMNVAEVDK.V
*	2016-11-16-hjk-Sharma-Shalini-SL3-wt.15442.15442.2	1.8641	0.394	99.8	1024.52	1024.52	-1	6.49507e+06	1	9.45434	8.26	56.2	1	K.TYAICGAIR.R
*	2016-11-16-hjk-Sharma-Shalini-SL3-wt.10945.10945.2	2.7245	0.3549	100	1278.61	1278.61	-0.4	6.75137e+06	1	6.70938	4.72	55	1	R.RMGESDDSILR.L
*	2016-11-16-hjk-Sharma-Shalini-SL3-wt.14078.14078.2	2.8939	0.5552	100	1122.51	1122.51	-0.8	4.13663e+06	1	11.0703	4.14	66.7	1	R.MGESDDSILR.L
Q8WVV4	25	29	0.408	595	68696	6.3	U	0.0024357	1.55859	Protein POF1B OS=Homo sapiens GN=POF1B PE=1 SV=2	0	29	0
*	2016-11-16-hjk-Sharma-Shalini-SL3-wt.6047.6047.2	1.3224	0.4884	99.2	897.415	897.413	1.6	1.33129e+06	1	7.27207	8.8	61.5	1	R.TYSGPMNK.V
*	2016-11-16-hjk-Sharma-Shalini-SL3-wt.20704.20704.2	2.3178	0.3634	99.9	1245.66	1245.66	-0.6	2.22974e+06	1	11.2885	6.56	58.8	1	K.VVQALDPFNSR.E
*	2016-11-16-hjk-Sharma-Shalini-SL3-wt.19857.19857.3	4.9642	0.5942	100	2658.28	2658.28	-1.4	2.05357e+06	1	11.1443	6.51	30	1	K.TTSSYQNLVWSDHSQELHSPTLK.I
*	2016-11-16-hjk-Sharma-Shalini-SL3-wt.12897.12897.2	2.3656	0.5231	100	1193.65	1193.65	-1.1	4653894	1	9.43427	9.08	61.1	1	K.LTTYPQTTIR.K
*	2016-11-16-hjk-Sharma-Shalini-SL3-wt.26767.26767.2	4.9695	0.5603	100	1947	1947	0	2054626	1	11.2069	4.46	64.3	2	K.YVVQNPEQEPLSQFLR.G
*	2016-11-16-hjk-Sharma-Shalini-SL3-wt.18046.18046.2	3.9284	0.5699	100	1608.78	1608.78	-0.8	2.06954e+06	1	12.7388	7.33	77.3	1	R.GSHFFPGNNVIYEK.T
*	2016-11-16-hjk-Sharma-Shalini-SL3-wt.18021.18021.3	2.0535	0.3295	99.6	1608.78	1608.78	-0.1	3792984	1	5.00481	7.33	39	1	R.GSHFFPGNNVIYEK.T
*	2016-11-16-hjk-Sharma-Shalini-SL3-wt.26848.26848.2	2.573	0.404	100	1411.76	1411.76	-0.3	1.1509e+06	1	10.0346	6.56	71.4	1	R.YFGELLADLSRK.N
*	2016-11-16-hjk-Sharma-Shalini-SL3-wt.26463.26463.3	4.1867	0.4833	100	1811.89	1811.89	0.9	1.04821e+06	1	9.65089	6.51	47.6	1	K.NTDLYHCLLEHLQR.I
*	2016-11-16-hjk-Sharma-Shalini-SL3-wt.27862.27862.2	6.3037	0.4518	100	2081.94	2081.94	-0.6	1.45619e+06	1	14.0445	3.69	62.5	3	K.QDFESTDESEDIESLIPK.G
*	2016-11-16-hjk-Sharma-Shalini-SL3-wt.22724.22724.2	2.3215	0.4878	100	1149.66	1149.66	-1.4	1.2335e+06	1	11.0385	10.06	66.7	1	R.LVLSTFSNIR.E
*	2016-11-16-hjk-Sharma-Shalini-SL3-wt.21977.21977.2	2.3407	0.5537	100	1208.62	1208.62	-0.3	8131084	1	8.48751	4.14	68.8	1	K.EYEELLASVR.A
*	2016-11-16-hjk-Sharma-Shalini-SL3-wt.2877.2877.2	2.2959	0.6523	100	1769.82	1769.82	1.2	246166	1	15.2012	7.33	42.3	1	R.ANNHQQQQGLQDSSSK.C
*	2016-11-16-hjk-Sharma-Shalini-SL3-wt.2870.2870.3	3.3695	0.4937	100	1769.81	1769.82	-0.8	778473	1	9.23296	7.33	37.5	1	R.ANNHQQQQGLQDSSSK.C
*	2016-11-16-hjk-Sharma-Shalini-SL3-wt.16156.16156.2	3.2143	0.4202	100	1447.7	1446.7	-2.3	3.85604e+06	1	8.6747	4.46	70	2	K.CQALEENNLSLR.H
*	2016-11-16-hjk-Sharma-Shalini-SL3-wt.10246.10246.2	2.5399	0.5692	100	1151.51	1151.52	-1.9	3392739	1	12.8359	5.63	68.8	1	R.HTLSDMEYR.L
*	2016-11-16-hjk-Sharma-Shalini-SL3-wt.6374.6374.2	3.7669	0.4592	100	1413.72	1413.72	-0.9	8323634	1	9.63634	6.56	75	1	K.RNLEQENQNLR.M
*	2016-11-16-hjk-Sharma-Shalini-SL3-wt.6364.6364.3	3.2286	0.363	100	1413.72	1413.72	-0.5	9019563	1	7.90053	6.56	59.4	1	K.RNLEQENQNLR.M
*	2016-11-16-hjk-Sharma-Shalini-SL3-wt.8591.8591.2	2.6783	0.3994	100	1257.62	1257.62	-0.4	1189410	1	10.8033	4.46	61.1	1	R.NLEQENQNLR.M
*	2016-11-16-hjk-Sharma-Shalini-SL3-wt.15482.15482.2	4.498	0.6232	100	1566.69	1566.69	-1.2	2.3762e+06	1	9.86566	4.72	79.2	1	K.MDEIGNHYTEMVK.N
*	2016-11-16-hjk-Sharma-Shalini-SL3-wt.15446.15446.3	2.7344	0.3424	99.9	1567.7	1566.69	0.2	1.63213e+06	1	7.19244	4.72	19.6	1	K.MDEIGNHYTEMVK.N
*	2016-11-16-hjk-Sharma-Shalini-SL3-wt.4131.4131.2	1.8437	0.3133	99.4	1017.51	1017.51	-1.4	677916	1	6.87949	8.8	61.5	1	R.SQLNQYHK.D
*	2016-11-16-hjk-Sharma-Shalini-SL3-wt.20123.20123.2	3.7859	0.6264	100	1311.72	1311.72	-0.2	6.37485e+06	1	12.4053	4.72	94.4	1	K.LHELTSLLEEK.D
*	2016-11-16-hjk-Sharma-Shalini-SL3-wt.6345.6345.3	3.0548	0.5446	100	1929.95	1929.95	0.8	13518318	1	10.2098	9.08	29	1	K.LRQEIYSSHNQPSTGGR.T
*	2016-11-16-hjk-Sharma-Shalini-SL3-wt.6343.6343.4	2.6936	0.4955	100	1929.95	1929.95	0.3	5271025	1	8.89139	9.08	24.3	1	K.LRQEIYSSHNQPSTGGR.T
O14950	8	8	0.407	172	19779	4.8	U	0.00232436	1.5527	Myosin regulatory light chain 12B OS=Homo sapiens GN=MYL12B PE=1 SV=2	0	8	0
P19105	8	8	0.409	171	19794	4.8	U	0.00233795	1.56448	Myosin regulatory light chain 12A OS=Homo sapiens GN=MYL12A PE=1 SV=2	0	8	0
	2016-11-16-hjk-Sharma-Shalini-SL3-wt.16365.16365.2	3.0232	0.5207	100	1237.56	1237.56	-1.4	8589218	1	7.99493	4.46	61.1	1	K.EAFNMIDQNR.D
	2016-11-16-hjk-Sharma-Shalini-SL3-wt.28535.28535.3	3.9513	0.5962	100	2003.97	2003.97	0.1	676071	1	13.294	4.58	46.9	1	R.DGFIDKEDLHDMLASLGK.N
	2016-11-16-hjk-Sharma-Shalini-SL3-wt.26430.26430.2	3.8425	0.6669	100	1328.65	1328.65	1.2	1.39113e+06	1	13.5418	4.72	81.8	1	K.EDLHDMLASLGK.N
	2016-11-16-hjk-Sharma-Shalini-SL3-wt.15413.15413.2	3.1947	0.5832	100	1228.62	1228.62	-0.1	3.76581e+06	1	11.2142	4.14	70	1	K.LNGTDPEDVIR.N
	2016-11-16-hjk-Sharma-Shalini-SL3-wt.15050.15050.2	2.1793	0.4944	100	1035.51	1035.51	-1.4	2987520	1	8.60636	4.46	56.2	1	R.ELLTTMGDR.F
	2016-11-16-hjk-Sharma-Shalini-SL3-wt.27013.27013.3	3.6416	0.6154	100	2432.13	2432.13	-0.4	1.22013e+06	1	12.4106	4.03	21.6	1	R.ELLTTMGDRFTDEEVDELYR.E
	2016-11-16-hjk-Sharma-Shalini-SL3-wt.20309.20309.2	3.545	0.4768	100	1415.63	1415.63	-0.3	3589380	1	8.77637	3.86	70	1	R.FTDEEVDELYR.E
	2016-11-16-hjk-Sharma-Shalini-SL3-wt.18845.18845.2	4.4025	0.5858	100	1388.69	1388.7	-0.8	5282412	1	12.9334	8.8	80	1	K.KGNFNYIEFTR.I
P04083	15	16	0.405	346	38714	7	U	0.00231093	1.54097	Annexin A1 OS=Homo sapiens GN=ANXA1 PE=1 SV=2	0	16	0
*	2016-11-16-hjk-Sharma-Shalini-SL3-wt.21716.21716.3	4.2602	0.5576	99.6	2356.14	2356.16	-5.5	2168595	1	11.1421	7.33	33.8	1	K.GGPGSAVSPYPTFNPSSDVAALHK.A
*	2016-11-16-hjk-Sharma-Shalini-SL3-wt.17083.17083.2	5.1884	0.6168	100	1776.93	1776.94	-1.6	2326008	1	13.3524	4.72	88.5	1	K.AAYLQETGKPLDETLK.K
*	2016-11-16-hjk-Sharma-Shalini-SL3-wt.14237.14237.3	3.3186	0.5047	100	1905.03	1905.03	-0.2	4.8658e+06	1	9.77447	6.56	30	1	K.AAYLQETGKPLDETLKK.A
*	2016-11-16-hjk-Sharma-Shalini-SL3-wt.16339.16339.2	3.9466	0.7006	100	1262.6	1262.6	-1.2	5.69247e+06	1	16.274	4.14	80	2	K.TPAQFDADELR.A
*	2016-11-16-hjk-Sharma-Shalini-SL3-wt.5423.5423.2	2.4088	0.2228	99.7	936.513	936.515	-2	2918143	1	4.78629	6.56	90.9	1	R.VYREELK.R
*	2016-11-16-hjk-Sharma-Shalini-SL3-wt.13857.13857.2	2.6103	0.7625	100	1213.53	1213.53	-0.8	8946640	1	17.5488	4.14	52.6	1	K.DITSDTSGDFR.N
*	2016-11-16-hjk-Sharma-Shalini-SL3-wt.18173.18173.2	2.3247	0.3672	100	829.515	829.514	1	2.73307e+06	1	6.63933	9.08	71.4	1	R.NALLSLAK.G
*	2016-11-16-hjk-Sharma-Shalini-SL3-wt.16315.16315.2	3.6071	0.594	100	2067.88	2067.89	-1.4	3.07581e+06	1	9.30954	4.03	56.2	1	K.GDRSEDFGVNEDLADSDAR.A
*	2016-11-16-hjk-Sharma-Shalini-SL3-wt.16324.16324.3	3.9879	0.6209	100	2067.88	2067.89	-0.7	9586121	1	12.1159	4.03	37.9	1	K.GDRSEDFGVNEDLADSDAR.A
*	2016-11-16-hjk-Sharma-Shalini-SL3-wt.18495.18495.2	4.8063	0.6967	100	1739.73	1739.74	-1.8	3.10142e+06	1	14.5735	3.8	77.8	1	R.SEDFGVNEDLADSDAR.A
*	2016-11-16-hjk-Sharma-Shalini-SL3-wt.8043.8043.2	1.457	0.3724	99.2	908.448	908.447	0.5	5.41545e+06	1	6.52298	4.46	69.2	1	R.ALYEAGER.R
*	2016-11-16-hjk-Sharma-Shalini-SL3-wt.27853.27853.2	4.0929	0.6638	100	1550.82	1550.82	0.8	1.56635e+06	1	12.7508	6.56	66.7	1	K.GTDVNVFNTILTTR.S
*	2016-11-16-hjk-Sharma-Shalini-SL3-wt.19930.19930.2	1.7223	0.1998	99	829.503	829.503	0.1	2.05855e+06	1	4.73609	4.46	72.7	1	K.VLDLELK.G
*	2016-11-16-hjk-Sharma-Shalini-SL3-wt.12870.12870.2	2.0541	0.3406	99.9	804.465	804.465	0.4	5.15341e+06	1	6.79262	8.26	83.3	1	K.CLTAIVK.C
*	2016-11-16-hjk-Sharma-Shalini-SL3-wt.14917.14917.2	2.238	0.3162	99.7	809.417	809.419	-2.9	4290348	1	9.33959	6.56	90.9	1	K.PAFFAEK.L
P61978	18	21	0.404	463	50976	5.5	U	0.00226663	1.53513	Heterogeneous nuclear ribonucleoprotein K OS=Homo sapiens GN=HNRNPK PE=1 SV=1	0	21	0
*	2016-11-16-hjk-Sharma-Shalini-SL3-wt.11016.11016.2	5.2239	0.6687	100	1579.7	1579.71	-1.5	4.9338e+06	1	12.0015	4.25	83.3	2	K.RPAEDMEEEQAFK.R
*	2016-11-16-hjk-Sharma-Shalini-SL3-wt.11000.11000.3	2.9371	0.4532	100	1579.71	1579.71	0.1	1.71405e+06	1	11.3671	4.25	48.6	1	K.RPAEDMEEEQAFK.R
*	2016-11-16-hjk-Sharma-Shalini-SL3-wt.9367.9367.3	2.6947	0.351	99.9	1735.81	1735.81	-0.7	3.03747e+06	1	8.2883	4.57	35.4	1	K.RPAEDMEEEQAFKR.S
*	2016-11-16-hjk-Sharma-Shalini-SL3-wt.11559.11559.2	3.4337	0.4353	100	1349.65	1349.65	-0.4	1.98141e+06	1	8.19338	4.72	88.9	1	R.SRNTDEMVELR.I
*	2016-11-16-hjk-Sharma-Shalini-SL3-wt.14268.14268.3	3.945	0.526	100	2121.02	2121.02	0.6	2074573	1	9.283	4.72	43.1	1	K.ALRTDYNASVSVPDSSGPER.I
*	2016-11-16-hjk-Sharma-Shalini-SL3-wt.13707.13707.2	4.686	0.7	100	1780.8	1780.8	-1.3	3028645	1	17.9432	4.14	64.5	1	R.TDYNASVSVPDSSGPER.I
*	2016-11-16-hjk-Sharma-Shalini-SL3-wt.13597.13597.2	2.5008	0.5135	100	1098.45	1098.45	0	5.23295e+06	1	9.98094	4.14	64.3	1	K.GSDFDCELR.L
*	2016-11-16-hjk-Sharma-Shalini-SL3-wt.22018.22018.3	2.994	0.5573	100	1518.93	1518.94	-1.1	1.79683e+06	1	10.0282	9.08	29.4	1	R.LLIHQSLAGGIIGVK.G
*	2016-11-16-hjk-Sharma-Shalini-SL3-wt.5945.5945.2	3.344	0.4108	100	1332.71	1332.71	-0.5	1.75696e+06	1	6.61556	6.56	68.4	1	K.ELRENTQTTIK.L
*	2016-11-16-hjk-Sharma-Shalini-SL3-wt.8273.8273.2	3.7312	0.6742	100	1549.65	1549.65	-2	1.72173e+06	1	11.8466	5.63	81	1	K.LFQECCPHSTDR.V
*	2016-11-16-hjk-Sharma-Shalini-SL3-wt.8278.8278.3	2.7208	0.6721	100	1549.65	1549.65	-1	8455632	1	9.27594	5.63	42.1	1	K.LFQECCPHSTDR.V
*	2016-11-16-hjk-Sharma-Shalini-SL3-wt.28649.28649.2	3.5629	0.5611	100	1340.8	1340.8	0.9	1.24074e+06	1	10.1491	4.46	68.2	2	K.IILDLISESPIK.G
*	2016-11-16-hjk-Sharma-Shalini-SL3-wt.9483.9483.2	1.2296	0.6013	99.6	998.387	998.388	-1.5	2.01106e+06	1	4.40973	4.14	61.5	1	R.DYDDMSPR.R
*	2016-11-16-hjk-Sharma-Shalini-SL3-wt.17484.17484.2	2.006	0.4943	99.9	1194.7	1194.7	-1.1	3.5561e+06	1	9.19988	10.06	57.9	2	R.NLPLPPPPPPR.G
*	2016-11-16-hjk-Sharma-Shalini-SL3-wt.25209.25209.2	6.2582	0.7117	100	1917.03	1917.03	-0.6	2.74873e+06	1	18.409	6.56	68.8	1	R.GSYGDLGGPIITTQVTIPK.D
*	2016-11-16-hjk-Sharma-Shalini-SL3-wt.2871.2871.3	3.3265	0.3869	100	1225.66	1225.66	-0.2	1.22582e+06	1	6.24474	9.08	62.9	1	K.QIRHESGASIK.I
*	2016-11-16-hjk-Sharma-Shalini-SL3-wt.11397.11397.2	2.2762	0.4127	100	1259.57	1259.58	-0.9	10722489	1	9.28923	3.86	50	1	K.IDEPLEGSEDR.I
*	2016-11-16-hjk-Sharma-Shalini-SL3-wt.29219.29219.2	4.6975	0.7322	100	2589.39	2589.39	-0.6	281276	1	17.3147	6.56	33.3	1	R.IITITGTQDQIQNAQYLLQNSVK.Q
P04075	11	14	0.404	364	39420	8.1	U	0.00192207	1.53513	Fructose-bisphosphate aldolase A OS=Homo sapiens GN=ALDOA PE=1 SV=2	0	14	0
*	2016-11-16-hjk-Sharma-Shalini-SL3-wt.7102.7102.2	2.1565	0.4102	99.9	940.483	940.485	-1.5	8572108	1	7.71379	5.63	78.6	2	K.ELSDIAHR.I
*	2016-11-16-hjk-Sharma-Shalini-SL3-wt.15059.15059.2	2.9404	0.4482	100	1332.7	1332.7	-1.4	13162210	1	9.96706	4.46	64	1	K.GILAADESTGSIAK.R
*	2016-11-16-hjk-Sharma-Shalini-SL3-wt.5746.5746.3	3.3847	0.4508	100	1802.91	1802.91	-0.4	11128860	1	7.65357	6.56	36	1	K.RLQSIGTENTEENRR.F
*	2016-11-16-hjk-Sharma-Shalini-SL3-wt.8732.8732.2	3.3033	0.56	100	1490.71	1490.71	0.1	1.17156e+06	1	11.7908	4.14	56.5	1	R.LQSIGTENTEENR.R
*	2016-11-16-hjk-Sharma-Shalini-SL3-wt.22072.22072.2	5.421	0.7144	100	2272.14	2272.14	-1.4	3.58956e+06	1	18.5136	4.14	55	1	K.GVVPLAGTNGETTTQGLDGLSER.C
*	2016-11-16-hjk-Sharma-Shalini-SL3-wt.26843.26843.3	4.8841	0.4597	100	2107.1	2107.1	0.1	2.15042e+06	1	9.70579	5.63	30.6	2	K.IGEHTPSALAIMENANVLAR.Y
	2016-11-16-hjk-Sharma-Shalini-SL3-wt.26746.26746.3	4.6798	0.6098	99.9	3020.52	3020.5	5.7	920066	1	11.8058	4.25	28	2	R.YASICQQNGIVPIVEPEILPDGDHDLK.R
*	2016-11-16-hjk-Sharma-Shalini-SL3-wt.20083.20083.3	3.7908	0.5582	100	1709.92	1709.92	0.8	1644181	1	9.12829	6.51	40.9	1	K.ALSDHHIYLEGTLLK.P
*	2016-11-16-hjk-Sharma-Shalini-SL3-wt.5643.5643.3	2.5075	0.4924	100	1440.67	1440.67	0	1.42138e+06	1	7.25303	8.23	32.5	1	K.PNMVTPGHACTQK.F
*	2016-11-16-hjk-Sharma-Shalini-SL3-wt.6879.6879.2	3.1587	0.2356	99.9	1288.68	1288.68	-0.9	5431122	1	8.0656	9.35	63.6	1	K.RALANSLACQGK.Y
*	2016-11-16-hjk-Sharma-Shalini-SL3-wt.6881.6881.3	3.3587	0.6382	100	1288.68	1288.68	0.3	1.55016e+06	1	10.2261	9.35	42.5	1	K.RALANSLACQGK.Y
P23396	10	11	0.399	243	26688	9.7	U	0.00226219	1.50611	40S ribosomal protein S3 OS=Homo sapiens GN=RPS3 PE=1 SV=2	0	11	0
*	2016-11-16-hjk-Sharma-Shalini-SL3-wt.17344.17344.2	2.4163	0.3838	100	1024.58	1024.58	0.8	1.12096e+06	1	6.92215	8.8	93.8	1	R.KFVADGIFK.A
*	2016-11-16-hjk-Sharma-Shalini-SL3-wt.20723.20723.2	1.6661	0.3003	99.3	896.487	896.488	-0.5	2558294	1	7.32282	6.56	71.4	1	K.FVADGIFK.A
*	2016-11-16-hjk-Sharma-Shalini-SL3-wt.15339.15339.2	3.6569	0.5732	100	1423.66	1423.67	-5.1	4.44059e+06	1	13.9166	3.96	63.6	1	R.ELAEDGYSGVEVR.V
*	2016-11-16-hjk-Sharma-Shalini-SL3-wt.21268.21268.2	1.7483	0.5222	100	1029.63	1029.63	-0.5	6.26146e+06	1	8.06504	6.56	75	1	R.TEIIILATR.T
*	2016-11-16-hjk-Sharma-Shalini-SL3-wt.22194.22194.3	3.647	0.484	100	1728.86	1728.86	-1.7	2.16998e+06	1	8.85097	4.72	46.7	1	K.RFGFPEGSVELYAEK.V
*	2016-11-16-hjk-Sharma-Shalini-SL3-wt.25085.25085.2	1.8162	0.393	99.6	1572.76	1572.76	-0.8	2.75524e+06	1	9.42327	4.14	65.2	1	R.FGFPEGSVELYAEK.V
*	2016-11-16-hjk-Sharma-Shalini-SL3-wt.20252.20252.2	2.9373	0.5151	100	1288.67	1288.67	-0.6	3.21847e+06	1	9.90888	6.56	70	1	R.GLCAIAQAESLR.Y
*	2016-11-16-hjk-Sharma-Shalini-SL3-wt.26823.26823.2	2.1198	0.5654	100	1157.6	1157.6	-1.4	641751	1	10.2264	6.56	61.1	2	K.IMLPWDPTGK.I
*	2016-11-16-hjk-Sharma-Shalini-SL3-wt.19020.19020.2	2.5069	0.277	99.3	1470.77	1470.77	3.3	2816306	1	9.59062	4.14	45.8	1	K.DEILPTTPISEQK.G
*	2016-11-16-hjk-Sharma-Shalini-SL3-wt.16279.16279.2	3.4499	0.6492	100	1573.81	1573.8	4.3	2.09709e+06	1	10.8673	6.56	69.6	1	K.GGKPEPPAMPQPVPTA.-
P18669	8	9	0.398	254	28804	7.2	U	0.00177072	1.50035	Phosphoglycerate mutase 1 OS=Homo sapiens GN=PGAM1 PE=1 SV=2	0	9	0
*	2016-11-16-hjk-Sharma-Shalini-SL3-wt.12010.12010.2	4.0324	0.7094	100	1312.6	1312.6	-1.2	9924136	1	20.7817	5.63	85	1	R.HGESAWNLENR.F
*	2016-11-16-hjk-Sharma-Shalini-SL3-wt.20292.20292.3	3.765	0.5925	100	1979.88	1979.88	-0.4	1.69648e+06	1	11.9088	4.4	32.8	1	R.FSGWYDADLSPAGHEEAK.R
	2016-11-16-hjk-Sharma-Shalini-SL3-wt.9286.9286.2	1.807	0.4114	99.8	1060.56	1059.56	-0.6	5849419	1	6.66962	8.8	55.6	1	R.HYGGLTGLNK.A
	2016-11-16-hjk-Sharma-Shalini-SL3-wt.21451.21451.3	3.9006	0.5267	100	2417.11	2417.11	-0.5	2.26967e+06	1	13.6402	4.72	29.9	1	R.SYDVPPPPMEPDHPFYSNISK.D
*	2016-11-16-hjk-Sharma-Shalini-SL3-wt.20107.20107.2	4.6187	0.6053	100	1868.86	1868.86	-0.1	1.91479e+06	1	14.7215	3.96	79.2	1	R.YADLTEDQLPSCESLK.D
	2016-11-16-hjk-Sharma-Shalini-SL3-wt.7647.7647.3	3.0522	0.3317	100	1306.77	1306.77	-0.6	3.6439e+06	1	11.0429	12	47.2	1	K.RVLIAAHGNSLR.G
	2016-11-16-hjk-Sharma-Shalini-SL3-wt.9873.9873.2	2.6117	0.5674	100	1150.67	1150.67	-1.7	3071253	1	10.3933	10.06	84.2	2	R.VLIAAHGNSLR.G
	2016-11-16-hjk-Sharma-Shalini-SL3-wt.16013.16013.3	3.682	0.5053	100	1549.77	1549.77	-1.4	1144571	1	8.74718	4.72	46.3	1	K.PMQFLGDEETVRK.A
P31944	13	13	0.397	242	27680	5.6	U	0.00268454	1.49459	Caspase-14 OS=Homo sapiens GN=CASP14 PE=1 SV=2	0	13	0
*	2016-11-16-hjk-Sharma-Shalini-SL3-wt.24099.24099.2	2.1632	0.4088	99.5	1030.64	1030.63	4.4	1.301e+06	1	9.75975	8.26	73.3	1	R.LALILCVTK.A
*	2016-11-16-hjk-Sharma-Shalini-SL3-wt.25314.25314.3	5.4527	0.4298	100	2004.91	2004.91	0.2	7036690	1	11.0984	4.42	47.5	1	K.AREGSEEDLDALEHMFR.Q
*	2016-11-16-hjk-Sharma-Shalini-SL3-wt.25288.25288.4	4.0516	0.42	100	2004.91	2004.91	0.2	1.06873e+06	1	9.09374	4.42	25.6	1	K.AREGSEEDLDALEHMFR.Q
*	2016-11-16-hjk-Sharma-Shalini-SL3-wt.27696.27696.3	4.3096	0.3931	100	1777.77	1777.77	0.3	1.20399e+06	1	11.1985	4.12	50	1	R.EGSEEDLDALEHMFR.Q
*	2016-11-16-hjk-Sharma-Shalini-SL3-wt.17137.17137.2	6.0155	0.4238	100	1719.81	1719.82	-3.9	3401111	1	9.28095	4.25	76.9	1	K.RDPTAEQFQEELEK.F
*	2016-11-16-hjk-Sharma-Shalini-SL3-wt.17133.17133.3	3.3422	0.5477	100	1719.82	1719.82	-0.8	3.22764e+06	1	10.6184	4.25	53.7	1	K.RDPTAEQFQEELEK.F
*	2016-11-16-hjk-Sharma-Shalini-SL3-wt.28809.28809.3	3.9368	0.5618	100	2733.32	2733.32	-1.5	423373	1	11.0222	5.8	28.4	1	K.FQQAIDSREDPVSCAFVVLMAHGR.E
*	2016-11-16-hjk-Sharma-Shalini-SL3-wt.14179.14179.2	2.1589	0.4829	99.9	1022.55	1022.55	2.7	17317594	1	9.10705	8.26	69.2	1	K.VYIIQACR.G
*	2016-11-16-hjk-Sharma-Shalini-SL3-wt.10136.10136.2	3.9179	0.4938	100	1360.69	1360.69	-1.3	3.25948e+06	1	8.64162	4.72	68.2	1	R.RMAEAELVQEGK.A
*	2016-11-16-hjk-Sharma-Shalini-SL3-wt.12375.12375.2	3.1604	0.4966	100	1204.59	1204.59	0.5	12737814	1	8.26115	4.14	65	1	R.MAEAELVQEGK.A
*	2016-11-16-hjk-Sharma-Shalini-SL3-wt.8004.8004.2	2.7342	0.4258	100	1286.71	1286.71	-0.9	1.76363e+06	1	7.1955	9.08	65	1	R.KTNPEIQSTLR.K
*	2016-11-16-hjk-Sharma-Shalini-SL3-wt.5889.5889.3	3.7618	0.2459	99.9	1414.8	1414.8	1.9	1.36683e+06	1	9.04701	9.98	48.6	1	R.KTNPEIQSTLRK.R
*	2016-11-16-hjk-Sharma-Shalini-SL3-wt.8033.8033.3	2.405	0.3732	99.9	1286.71	1286.71	0.3	1.61373e+06	1	7.54618	9.08	34.2	1	K.TNPEIQSTLRK.R
P22392	6	6	0.395	152	17298	8.4	U	0.00197265	1.48313	Nucleoside diphosphate kinase B OS=Homo sapiens GN=NME2 PE=1 SV=1	0	6	0
	2016-11-16-hjk-Sharma-Shalini-SL3-wt.13291.13291.2	4.1567	0.5539	100	1785.91	1785.92	-3	1.22772e+06	1	12.3775	6.56	64.3	1	R.VMLGETNPADSKPGTIR.G
	2016-11-16-hjk-Sharma-Shalini-SL3-wt.13264.13264.3	3.2283	0.5575	100	1785.91	1785.92	-2.1	5017199	1	9.67824	6.56	27.5	1	R.VMLGETNPADSKPGTIR.G
	2016-11-16-hjk-Sharma-Shalini-SL3-wt.17363.17363.2	1.9917	0.5702	100	1051.5	1051.5	0	10770650	1	10.6835	6.56	71.4	1	R.GDFCIQVGR.N
	2016-11-16-hjk-Sharma-Shalini-SL3-wt.5957.5957.2	2.034	0.3079	99.8	1069.56	1069.56	-0.1	2724191	1	8.20914	7.33	88.2	1	R.NIIHGSDSVK.S
*	2016-11-16-hjk-Sharma-Shalini-SL3-wt.29273.29273.2	4.2272	0.5842	100	1895.98	1895.98	-0.8	687480	1	12.5325	4.4	52	1	K.EISLWFKPEELVDYK.S
	2016-11-16-hjk-Sharma-Shalini-SL3-wt.15784.15784.2	1.6728	0.6793	99.8	1167.46	1166.46	-4.4	2.49561e+06	1	7.66396	4.46	57.1	1	K.SCAHDWVYE.-
P68366	20	28	0.393	448	49924	5.1	U	0.00312336	1.47172	Tubulin alpha-4A chain OS=Homo sapiens GN=TUBA4A PE=1 SV=1	0	28	0
*	2016-11-16-hjk-Sharma-Shalini-SL3-wt.27438.27438.2	4.6686	0.7978	100	2067.89	2067.9	-2.2	761740	1	20.154	4.14	42.9	1	K.TIGGGDDSFTTFFCETGAGK.H
	2016-11-16-hjk-Sharma-Shalini-SL3-wt.19984.19984.3	5.3803	0.4647	100	2415.2	2415.2	-1.1	4.04935e+06	1	11.2064	5.8	41.3	1	R.QLFHPEQLITGKEDAANNYAR.G
	2016-11-16-hjk-Sharma-Shalini-SL3-wt.20041.20041.4	2.9862	0.3405	99.6	2415.21	2415.2	1.7	3.65818e+06	1	5.85996	5.8	22.7	1	R.QLFHPEQLITGKEDAANNYAR.G
	2016-11-16-hjk-Sharma-Shalini-SL3-wt.4702.4702.2	2.8015	0.5106	100	1023.45	1023.45	-2.7	1.20973e+06	1	10.408	4.46	62.5	1	K.EDAANNYAR.G
*	2016-11-16-hjk-Sharma-Shalini-SL3-wt.19608.19608.2	2.0721	0.349	99.9	1069.59	1069.59	-0.3	3.33612e+06	1	8.07042	4.14	66.7	1	K.EIIDPVLDR.I
	2016-11-16-hjk-Sharma-Shalini-SL3-wt.6877.6877.2	1.9016	0.5111	100	909.503	909.504	-1.3	4.97864e+06	1	9.44467	8.64	57.1	1	R.LSVDYGKK.S
	2016-11-16-hjk-Sharma-Shalini-SL3-wt.13585.13585.3	3.4512	0.5219	99.9	1874.98	1874.98	-3.3	3116893	1	8.07361	9.08	40.7	1	R.RNLDIERPTYTNLNR.L
	2016-11-16-hjk-Sharma-Shalini-SL3-wt.16597.16597.2	2.7695	0.2767	99.7	1718.88	1718.88	-2.3	5140622	1	6.02637	6.56	44	1	R.NLDIERPTYTNLNR.L
	2016-11-16-hjk-Sharma-Shalini-SL3-wt.25379.25379.2	4.4793	0.7272	100	1756.96	1756.96	0.2	2.19551e+06	1	16.4939	7.33	71.4	4	R.IHFPLATYAPVISAEK.A
	2016-11-16-hjk-Sharma-Shalini-SL3-wt.25274.25274.3	3.3162	0.6005	100	1756.96	1756.96	0.5	2.44695e+06	1	11.2584	7.33	31	5	R.IHFPLATYAPVISAEK.A
	2016-11-16-hjk-Sharma-Shalini-SL3-wt.20382.20382.2	2.0618	0.5716	100	1249.55	1249.55	-0.4	10822516	1	11.3372	8	62.5	1	K.YMACCLLYR.G
*	2016-11-16-hjk-Sharma-Shalini-SL3-wt.19040.19040.2	2.3399	0.5006	100	985.568	985.568	0	3.5019e+06	1	9.0378	6.56	61.1	1	K.DVNAAIAAIK.T
	2016-11-16-hjk-Sharma-Shalini-SL3-wt.24252.24252.2	2.7614	0.1741	99.7	1740.85	1740.85	-0.3	1.89601e+06	1	6.00152	8.26	53.8	1	K.RSIQFVDWCPTGFK.V
	2016-11-16-hjk-Sharma-Shalini-SL3-wt.24230.24230.3	3.97	0.6297	100	1740.85	1740.85	-2.5	2220071	1	12.3864	8.26	56.1	1	K.RSIQFVDWCPTGFK.V
	2016-11-16-hjk-Sharma-Shalini-SL3-wt.27436.27436.2	3.5222	0.636	100	1584.75	1584.75	-0.4	1159020	1	13.2581	6.56	66.7	1	R.SIQFVDWCPTGFK.V
	2016-11-16-hjk-Sharma-Shalini-SL3-wt.21958.21958.2	3.5318	0.5699	100	1825.98	1824.99	-5.2	2.9366e+06	1	10.5843	6.56	64.3	2	K.VGINYQPPTVVPGGDLAK.V
	2016-11-16-hjk-Sharma-Shalini-SL3-wt.28403.28403.2	4.1293	0.6539	100	1864.9	1864.9	-2.6	515046	1	11.7464	6.56	60.7	1	R.AVCMLSNTTAIAEAWAR.L
	2016-11-16-hjk-Sharma-Shalini-SL3-wt.15818.15818.3	2.7605	0.4286	99.9	1381.7	1380.7	-1.5	3.3025e+06	1	7.68811	7.25	39.5	1	R.LDHKFDLMYAK.R
	2016-11-16-hjk-Sharma-Shalini-SL3-wt.19657.19657.2	1.7948	0.3679	99.8	887.434	887.433	0.8	2.3516e+06	1	6.88047	6.56	66.7	1	K.FDLMYAK.R
	2016-11-16-hjk-Sharma-Shalini-SL3-wt.10316.10316.2	1.8095	0.4192	99.9	906.423	906.424	-0.3	3.48943e+06	1	6.85416	4.14	57.1	1	R.EDMAALEK.D
P61158	11	11	0.392	418	47371	5.9	U	0.0013151	1.46604	Actin-related protein 3 OS=Homo sapiens GN=ACTR3 PE=1 SV=3	0	11	0
*	2016-11-16-hjk-Sharma-Shalini-SL3-wt.28559.28559.2	4.5071	0.5237	100	2192.15	2192.14	1.7	987805	1	10.7514	6.56	58.6	1	K.LGYAGNTEPQFIIPSCIAIK.E
[truncated: 6,090 more rows]

## Sheet: Table S4
Table S4: List of peptides for proteins identified by MS analysis of the U1-SL3/M1g mutant complex.
DTASelect v2.1.3
/home/ip2_data/jwohl/Sharma_Shalini/2016_11_16_hjk_Sharma_Shalini_SL3_mut_2016_11_17_04_4315/search/projects2016_11_17_04_7528
/ip2_data/jwohl/database///Uniprot_Human_with_streptavidin_appended_06-20-2014_reversed.fasta
ProLuCID 1.4.2 in SQT format.
-p 2 -y 2 --trypstat --fp .01 --extra --mass --pI -DM 7 --DB --dm -t 1 --brief --quiet
TRUE	Use criteria
0	Minimum peptide probability
0.01	Peptide global false discovery rate
0	Minimum protein probability
1	Protein false discovery rate
1	Minimum charge state
50	Maximum charge state
-1	Minimum ion proportion
10000	Maximum Sp rank
-1	Minimum Sp score
7	Maximum mass deviation (ppm)
TRUE	Define delta mass with respect to nearest isotope
Include	Modified peptide inclusion
Full	Tryptic status requirement
FALSE	Multiple, ambiguous IDs allowed
Ignore	Peptide validation handling
Salt step	Purge duplicate peptides by protein
FALSE	Include only loci with unique peptide
TRUE	Remove subset proteins
Ignore	Locus validation handling
0	Minimum modified peptides per locus
2	Minimum peptides per locus
Locus	Sequence Count	Spectrum Count	Sequence Coverage	Length	MolWt	pI	Validation Status	NSAF	EMPAI	Descriptive Name	HRedundancy	LRedundancy	MRedundancy
Unique	FileName	XCorr	DeltCN	Conf%	M+H+	CalcM+H+	PPM	TotalIntensity	SpR	Prob Score	pI	IonProportion	Redundancy	Sequence
Q15365	18	47	0.683	356	37498	7.1	U	0.0144071	3.81948	Poly(rC)-binding protein 1 OS=Homo sapiens GN=PCBP1 PE=1 SV=2	0	47	0
	2016-11-16-hjk-Sharma-Shalini-SL3-mut.12029.12029.2	1.7154	0.4162	99.6	802.466	802.467	-0.5	216964752	1	6.00918	6.56	57.1	1	K.EVGSIIGK.K
	2016-11-16-hjk-Sharma-Shalini-SL3-mut.11034.11034.2	3.2862	0.5841	100	1288.59	1288.6	-0.3	217522880	1	14.9561	4.46	55	2	R.INISEGNCPER.I
*	2016-11-16-hjk-Sharma-Shalini-SL3-mut.26123.26123.2	3.6576	0.4801	100	1388.81	1388.81	0	8549587	1	13.2659	9.08	62.5	2	R.IITLTGPTNAIFK.A
	2016-11-16-hjk-Sharma-Shalini-SL3-mut.20822.20822.2	1.8739	0.4655	100	908.491	908.491	-0.2	104426336	1	9.79379	6.56	69.2	1	K.AFAMIIDK.L
*	2016-11-16-hjk-Sharma-Shalini-SL3-mut.19019.19019.3	4.7616	0.4794	100	2489.23	2489.23	-0.1	3386255	1	9.23401	4.72	32.3	5	K.LEEDINSSMTNSTAASRPPVTLR.L
*	2016-11-16-hjk-Sharma-Shalini-SL3-mut.19755.19755.2	2.8841	0.4235	99.9	1442.81	1442.8	2.1	23994422	1	11.9872	8.26	60.9	2	R.LVVPATQCGSLIGK.G
	2016-11-16-hjk-Sharma-Shalini-SL3-mut.20147.20147.2	5.8585	0.7162	100	2090.97	2089.98	-5.7	3.5442e+06	1	14.9693	4.14	71	11	R.ESTGAQVQVAGDMLPNSTER.A
*	2016-11-16-hjk-Sharma-Shalini-SL3-mut.22783.22783.2	3.2847	0.6264	100	1672.89	1672.89	-1	241284288	1	10.7649	6.56	54.2	1	R.AITIAGVPQSVTECVK.Q
*	2016-11-16-hjk-Sharma-Shalini-SL3-mut.29548.29548.2	5.8321	0.6189	100	1960	1960	1.5	11719021	1	13.6784	6.56	71.9	2	K.QICLVMLETLSQSPQGR.V
*	2016-11-16-hjk-Sharma-Shalini-SL3-mut.24803.24803.2	4.6181	0.5451	100	2475.19	2475.18	1	8081002	1	12.6248	6.56	43.2	2	R.VMTIPYQPMPASSPVICAGGQDR.C
*	2016-11-16-hjk-Sharma-Shalini-SL3-mut.24721.24721.3	4.9219	0.5424	100	2475.18	2475.18	0	2.60924e+06	1	11.5519	6.56	37.5	1	R.VMTIPYQPMPASSPVICAGGQDR.C
*	2016-11-16-hjk-Sharma-Shalini-SL3-mut.24412.24412.4	9.2368	0.7858	100	3945.87	3945.87	0.1	40145300	1	18.5818	4.95	21.7	4	R.CSDAAGYPHATHDLEGPPLDAYSIQGQHTISPLDLAK.L
*	2016-11-16-hjk-Sharma-Shalini-SL3-mut.24399.24399.5	7.1122	0.6093	100	3945.88	3945.87	2.8	68750744	1	13.4569	4.95	23.4	3	R.CSDAAGYPHATHDLEGPPLDAYSIQGQHTISPLDLAK.L
*	2016-11-16-hjk-Sharma-Shalini-SL3-mut.18995.18995.3	7.1871	0.7764	100	2606.18	2606.18	0.4	12841449	1	18.8884	6.51	45.3	2	R.QQSHFAMMHGGTGFAGIDSSSPEVK.G
*	2016-11-16-hjk-Sharma-Shalini-SL3-mut.19134.19134.4	2.5135	0.3979	99.2	2606.18	2606.18	0.4	2.82432e+06	1	7.41205	6.51	16.8	1	R.QQSHFAMMHGGTGFAGIDSSSPEVK.G
*	2016-11-16-hjk-Sharma-Shalini-SL3-mut.10659.10659.2	2.8507	0.4868	100	1014.53	1014.53	0.8	2.80354e+06	1	9.65403	6.56	68.8	2	R.QGANINEIR.Q
	2016-11-16-hjk-Sharma-Shalini-SL3-mut.6187.6187.2	1.825	0.2185	99.4	862.445	862.445	0.1	14565824	1	5.60849	9.08	64.3	1	R.QMSGAQIK.I
*	2016-11-16-hjk-Sharma-Shalini-SL3-mut.9021.9021.2	2.6454	0.5154	100	1086.55	1086.55	0.3	9376114	1	13.7408	6.56	60	4	K.IANPVEGSSGR.Q
P04406	25	98	0.615	335	36053	8.5	U	0.0319235	3.12098	Glyceraldehyde-3-phosphate dehydrogenase OS=Homo sapiens GN=GAPDH PE=1 SV=3	0	98	0
*	2016-11-16-hjk-Sharma-Shalini-SL3-mut.12558.12558.2	1.8214	0.4914	99.8	1032.6	1032.59	0.7	1.89798e+06	1	9.01574	10.99	47.1	1	K.VKVGVNGFGR.I
*	2016-11-16-hjk-Sharma-Shalini-SL3-mut.12261.12261.2	2.2275	0.449	100	805.432	805.432	0.2	34516140	1	8.9693	10.06	69.2	1	K.VGVNGFGR.I
*	2016-11-16-hjk-Sharma-Shalini-SL3-mut.23793.23793.3	6.7218	0.6065	100	2540.35	2540.35	2.9	1.50566e+06	1	11.6072	6.56	50	1	K.AENGKLVINGNPITIFQERDPSK.I
*	2016-11-16-hjk-Sharma-Shalini-SL3-mut.28478.28478.2	3.9163	0.5292	100	1613.9	1613.9	1.2	2.75765e+06	1	13.1504	6.56	70.8	2	K.LVINGNPITIFQER.D
*	2016-11-16-hjk-Sharma-Shalini-SL3-mut.25972.25972.2	4.5471	0.7033	100	2041.11	2041.11	-1	39398680	1	15.7415	6.56	63.3	2	K.LVINGNPITIFQERDPSK.I
*	2016-11-16-hjk-Sharma-Shalini-SL3-mut.25947.25947.3	4.5017	0.6355	100	2041.11	2041.11	-0.1	462314848	1	13.4439	6.56	35.7	3	K.LVINGNPITIFQERDPSK.I
*	2016-11-16-hjk-Sharma-Shalini-SL3-mut.29333.29333.3	5.5288	0.4786	100	2518.21	2518.22	-1.6	3.56843e+06	1	12.5297	4.4	38.8	1	K.IKWGDAGAEYVVESTGVFTTMEK.A
*	2016-11-16-hjk-Sharma-Shalini-SL3-mut.22720.22720.3	6.0418	0.6512	100	2369.21	2369.21	-0.5	12129235	1	14.2098	7.33	55.2	5	K.RVIISAPSADAPMFVMGVNHEK.Y
*	2016-11-16-hjk-Sharma-Shalini-SL3-mut.22793.22793.4	3.3865	0.6132	100	2369.21	2369.21	0.3	205341744	1	10.9278	7.33	17.5	3	K.RVIISAPSADAPMFVMGVNHEK.Y
*	2016-11-16-hjk-Sharma-Shalini-SL3-mut.25143.25143.2	5.3258	0.6943	100	2213.11	2213.11	-1.5	4.75725e+06	1	20.2758	5.63	57.1	1	R.VIISAPSADAPMFVMGVNHEK.Y
*	2016-11-16-hjk-Sharma-Shalini-SL3-mut.25130.25130.3	5.9264	0.7677	100	2213.11	2213.11	0.1	51288280	1	19.9991	5.63	41.2	2	R.VIISAPSADAPMFVMGVNHEK.Y
*	2016-11-16-hjk-Sharma-Shalini-SL3-mut.18418.18418.2	5.3097	0.688	100	1833.92	1833.92	0.1	52338008	1	15.9913	8.04	58.6	11	K.IISNASCTTNCLAPLAK.V
*	2016-11-16-hjk-Sharma-Shalini-SL3-mut.20289.20289.2	3.1926	0.4653	100	1411.79	1411.79	-0.8	172531488	1	9.92462	9.08	78.3	5	R.GALQNIIPASTGAAK.A
*	2016-11-16-hjk-Sharma-Shalini-SL3-mut.26713.26713.3	3.3143	0.5549	100	2307.2	2307.19	1.5	4.49139e+06	1	9.24631	8.26	44.4	1	K.LTGMAFRVPTANVSVVDLTCR.L
*	2016-11-16-hjk-Sharma-Shalini-SL3-mut.27578.27578.4	4.2704	0.2365	99	2677.41	2677.42	-1.6	3110383	1	7.6488	8.26	17.6	1	K.LTGMAFRVPTANVSVVDLTCRLEK.P
*	2016-11-16-hjk-Sharma-Shalini-SL3-mut.21550.21550.2	5.0248	0.6825	100	1530.8	1530.79	0.4	14701423	1	18.5401	6.56	80	13	R.VPTANVSVVDLTCR.L
*	2016-11-16-hjk-Sharma-Shalini-SL3-mut.23404.23404.2	6.4742	0.7051	100	1901.02	1901.02	0.3	11288892	1	16.483	6.56	86.2	2	R.VPTANVSVVDLTCRLEK.P
*	2016-11-16-hjk-Sharma-Shalini-SL3-mut.23397.23397.3	5.0738	0.695	100	1901.02	1901.02	1.8	30247918	1	14.8349	6.56	47.1	2	R.VPTANVSVVDLTCRLEK.P
*	2016-11-16-hjk-Sharma-Shalini-SL3-mut.5910.5910.2	2.2486	0.3623	100	829.443	829.441	1.8	34654820	1	6.90505	6.56	64.3	2	K.QASEGPLK.G
*	2016-11-16-hjk-Sharma-Shalini-SL3-mut.25572.25572.4	8.0784	0.7424	100	4036.89	4036.89	-1.9	9516720	1	17.5769	4.95	23	11	K.GILGYTEHQVVSSDFNSDTHSSTFDAGAGIALNDHFVK.L
*	2016-11-16-hjk-Sharma-Shalini-SL3-mut.26456.26456.2	4.0708	0.6531	100	1763.8	1763.8	-0.8	6.43811e+06	1	16.4804	4.46	57.7	18	K.LISWYDNEFGYSNR.V
*	2016-11-16-hjk-Sharma-Shalini-SL3-mut.16568.16568.2	3.3968	0.6178	100	1201.61	1201.61	-0.2	7.47139e+06	1	14.3959	7.33	89.5	2	R.VVDLMAHMASK.E
*	2016-11-16-hjk-Sharma-Shalini-SL3-mut.16567.16567.3	2.7971	0.5401	100	1201.61	1201.61	-1.3	5628985	1	12.0387	7.33	44.1	1	R.VVDLMAHMASK.E
*	2016-11-16-hjk-Sharma-Shalini-SL3-mut.17258.17258.2	4.6801	0.7771	100	1330.65	1330.65	-2	20986676	1	17.8153	5.63	95.2	6	R.VVDLMAHMASKE.-
*	2016-11-16-hjk-Sharma-Shalini-SL3-mut.17256.17256.3	2.5458	0.6011	100	1330.65	1330.65	-0.6	7773190	1	12.0783	5.63	42.1	1	R.VVDLMAHMASKE.-
P67809	22	32	0.614	324	35924	9.9	U	0.0107779	3.1115	Nuclease-sensitive element-binding protein 1 OS=Homo sapiens GN=YBX1 PE=1 SV=3	0	32	0
*	2016-11-16-hjk-Sharma-Shalini-SL3-mut.11540.11540.2	3.9952	0.5765	100	2084.99	2084.98	2	961053	1	13.7227	6.56	55.3	1	K.PGTTGSGAGSGGPGGLTSAAPAGGDK.K
*	2016-11-16-hjk-Sharma-Shalini-SL3-mut.9543.9543.3	5.6556	0.6451	100	2213.08	2213.08	-0.1	1.53533e+06	1	15.6652	8.8	45.5	1	K.PGTTGSGAGSGGPGGLTSAAPAGGDKK.V
	2016-11-16-hjk-Sharma-Shalini-SL3-mut.15474.15474.2	2.4847	0.6119	100	940.463	940.464	-0.5	10402409	1	12.2897	9.08	78.6	1	R.NGYGFINR.N
	2016-11-16-hjk-Sharma-Shalini-SL3-mut.12007.12007.2	2.9914	0.4218	100	1398.67	1398.68	-0.9	4.13017e+06	1	7.10872	8.8	61.9	2	R.NGYGFINRNDTK.E
	2016-11-16-hjk-Sharma-Shalini-SL3-mut.13663.13663.2	4.5114	0.6201	100	1286.67	1286.67	0.2	4488701	1	10.6537	5.63	94.7	2	K.EDVFVHQTAIK.K
	2016-11-16-hjk-Sharma-Shalini-SL3-mut.10306.10306.2	5.072	0.5197	100	1414.77	1414.77	0.3	5.23693e+06	1	10.4886	7.33	95.5	1	K.EDVFVHQTAIKK.N
	2016-11-16-hjk-Sharma-Shalini-SL3-mut.10317.10317.3	2.1626	0.4063	99	1414.77	1414.77	0.9	15792729	1	6.85131	7.33	37.1	1	K.EDVFVHQTAIKK.N
	2016-11-16-hjk-Sharma-Shalini-SL3-mut.22031.22031.2	5.7202	0.6956	100	1796.82	1795.82	-2.4	6.96243e+06	1	15.3053	3.8	72.4	6	R.SVGDGETVEFDVVEGEK.G
*	2016-11-16-hjk-Sharma-Shalini-SL3-mut.12193.12193.2	4.9223	0.6534	100	1695.87	1695.87	2.1	2.10167e+06	1	14.0436	6.56	61.3	2	K.GAEAANVTGPGGVPVQGSK.Y
*	2016-11-16-hjk-Sharma-Shalini-SL3-mut.7071.7071.2	4.346	0.7359	100	1688.72	1688.71	0.7	3.95618e+06	1	13.6571	4.46	70.8	1	R.NYQQNYQNSESGEK.N
*	2016-11-16-hjk-Sharma-Shalini-SL3-mut.5042.5042.2	4.6948	0.6379	100	1587.7	1587.7	2.1	3315026	1	18.7862	4.14	73.1	1	K.NEGSESAPEGQAQQR.R
*	2016-11-16-hjk-Sharma-Shalini-SL3-mut.11771.11771.3	2.3139	0.4309	99.2	1285.66	1285.66	-1.6	6.23263e+06	1	7.50991	10.91	56.7	1	R.RRFPPYYMR.R
*	2016-11-16-hjk-Sharma-Shalini-SL3-mut.15049.15049.2	2.0037	0.2744	99.5	1129.56	1129.56	-1.3	1.70876e+06	1	6.13869	10.01	78.6	1	R.RFPPYYMR.R
*	2016-11-16-hjk-Sharma-Shalini-SL3-mut.14322.14322.3	5.9301	0.6843	100	2871.31	2871.31	0.2	763782	1	17.737	4.4	24.5	1	R.RPQYSNPPVQGEVMEGADNQGAGEQGR.P
*	2016-11-16-hjk-Sharma-Shalini-SL3-mut.13923.13923.3	3.1467	0.5372	100	3223.53	3223.53	-0.6	10821453	1	8.75087	4.89	10.2	1	R.RPQYSNPPVQGEVMEGADNQGAGEQGRPVR.Q
*	2016-11-16-hjk-Sharma-Shalini-SL3-mut.13784.13784.4	6.3176	0.562	100	3223.53	3223.53	0.2	12963724	1	13.0538	4.89	28.1	2	R.RPQYSNPPVQGEVMEGADNQGAGEQGRPVR.Q
*	2016-11-16-hjk-Sharma-Shalini-SL3-mut.5562.5562.3	4.0146	0.6643	100	2628.1	2628.1	0.3	2.0405e+06	1	11.0195	3.95	36.9	1	R.EDGNEEDKENQGDETQGQQPPQR.R
*	2016-11-16-hjk-Sharma-Shalini-SL3-mut.4910.4910.3	3.179	0.6577	99.9	2784.19	2784.2	-3.9	2.96484e+06	1	10.9531	4.19	19.8	1	R.EDGNEEDKENQGDETQGQQPPQRR.Y
*	2016-11-16-hjk-Sharma-Shalini-SL3-mut.4906.4906.4	3.2975	0.5501	99.9	2784.21	2784.2	2.8	1.50007e+06	1	7.83972	4.19	14.4	1	R.EDGNEEDKENQGDETQGQQPPQRR.Y
*	2016-11-16-hjk-Sharma-Shalini-SL3-mut.5014.5014.2	3.7862	0.618	100	1711.76	1711.76	0.4	897582	1	14.1435	4.14	75	1	K.ENQGDETQGQQPPQR.R
*	2016-11-16-hjk-Sharma-Shalini-SL3-mut.3970.3970.3	2.7002	0.5224	100	1867.86	1867.86	-0.4	1.22882e+06	1	9.50521	4.72	31.7	1	K.ENQGDETQGQQPPQRR.Y
*	2016-11-16-hjk-Sharma-Shalini-SL3-mut.9699.9699.2	3.5538	0.7463	100	1897.8	1897.8	-0.6	1.17428e+06	1	14.2885	3.31	60.7	2	K.AADPPAENSSAPEAEQGGAE.-
P63244	17	18	0.603	317	35077	7.7	U	0.00619645	3.00867	Guanine nucleotide-binding protein subunit beta-2-like 1 OS=Homo sapiens GN=GNB2L1 PE=1 SV=3	0	18	0
*	2016-11-16-hjk-Sharma-Shalini-SL3-mut.29331.29331.3	6.525	0.6419	100	2627.3	2627.3	-0.1	3.71358e+06	1	13.9561	7.33	47.9	1	K.GHNGWVTQIATTPQFPDMILSASR.D
*	2016-11-16-hjk-Sharma-Shalini-SL3-mut.11971.11971.2	3.0592	0.423	100	1562.79	1562.79	-3.4	2.88668e+06	1	8.21873	6.56	58.3	1	K.LTRDETNYGIPQR.A
*	2016-11-16-hjk-Sharma-Shalini-SL3-mut.11918.11918.3	2.4464	0.415	99.5	1562.79	1562.79	-0.5	3.40925e+06	1	6.79702	6.56	35.7	1	K.LTRDETNYGIPQR.A
*	2016-11-16-hjk-Sharma-Shalini-SL3-mut.13296.13296.2	2.365	0.4445	99.7	1192.56	1192.56	3.2	2210221	1	9.12534	4.46	61.1	1	R.DETNYGIPQR.A
*	2016-11-16-hjk-Sharma-Shalini-SL3-mut.21321.21321.2	2.9029	0.5928	100	1264.66	1264.65	1.7	3840255	1	10.4687	6.56	65	1	R.LWDLTTGTTTR.R
*	2016-11-16-hjk-Sharma-Shalini-SL3-mut.23730.23730.2	2.8583	0.5772	99.9	1309.64	1309.64	3.4	1.53288e+06	1	10.8404	4.46	63.6	1	K.DVLSVAFSSDNR.Q
*	2016-11-16-hjk-Sharma-Shalini-SL3-mut.19812.19812.2	2.427	0.6141	100	1090.57	1090.57	0.3	5055583	1	10.651	8.26	68.8	1	K.LWNTLGVCK.Y
*	2016-11-16-hjk-Sharma-Shalini-SL3-mut.17221.17221.2	4.705	0.6541	100	1981.87	1981.87	0.1	1.80097e+06	1	13.4073	4.72	69.2	1	K.YTVQDESHSEWVSCVR.F
*	2016-11-16-hjk-Sharma-Shalini-SL3-mut.17193.17193.3	4.8309	0.6823	100	1981.87	1981.87	0.1	2914333	1	15.3998	4.72	36.5	2	K.YTVQDESHSEWVSCVR.F
*	2016-11-16-hjk-Sharma-Shalini-SL3-mut.23438.23438.2	4.3254	0.5344	100	1907.9	1907.9	0.1	3.83494e+06	1	15.0228	6.56	56.7	1	R.FSPNSSNPIIVSCGWDK.L
*	2016-11-16-hjk-Sharma-Shalini-SL3-mut.16073.16073.2	2.0611	0.5221	99.9	1004.5	1004.5	-0.9	10373522	1	8.69773	8.26	69.2	1	K.VWNLANCK.L
*	2016-11-16-hjk-Sharma-Shalini-SL3-mut.17620.17620.4	5.2515	0.6083	100	2743.31	2743.31	-1.8	14680023	1	11.0944	7.38	26.8	1	K.TNHIGHTGYLNTVTVSPDGSLCASGGK.D
*	2016-11-16-hjk-Sharma-Shalini-SL3-mut.25039.25039.2	3.8302	0.6501	100	1476.68	1476.68	1.1	4.96043e+06	1	15.2346	4.14	75	1	K.DGQAMLWDLNEGK.H
*	2016-11-16-hjk-Sharma-Shalini-SL3-mut.29440.29440.2	6.0317	0.6529	100	2276.12	2276.11	4.5	947477	1	19.8324	5.63	61.1	1	K.HLYTLDGGDIINALCFSPNR.Y
*	2016-11-16-hjk-Sharma-Shalini-SL3-mut.29411.29411.3	5.4531	0.6342	100	2276.12	2276.11	3	3545616	1	14.7725	5.63	41.7	1	K.HLYTLDGGDIINALCFSPNR.Y
*	2016-11-16-hjk-Sharma-Shalini-SL3-mut.22289.22289.2	2.7759	0.5151	100	1366.68	1366.68	-0.4	15896398	1	10.672	8.26	61.9	1	R.YWLCAATGPSIK.I
*	2016-11-16-hjk-Sharma-Shalini-SL3-mut.19864.19864.2	2.3594	0.3039	100	1059.6	1059.59	0.8	6.46342e+06	1	8.17649	10.06	66.7	1	R.VWQVTIGTR.-
P63167	4	4	0.596	89	10366	7.4	U	0.00490456	2.94457	Dynein light chain 1, cytoplasmic OS=Homo sapiens GN=DYNLL1 PE=1 SV=1	0	4	0
*	2016-11-16-hjk-Sharma-Shalini-SL3-mut.24239.24239.2	6.1843	0.8125	100	2514.04	2514.04	-0.9	1711363	1	18.5473	3.8	69.4	1	K.NADMSEEMQQDSVECATQALEK.Y
*	2016-11-16-hjk-Sharma-Shalini-SL3-mut.5690.5690.2	1.7763	0.2417	99	895.537	895.536	0.6	3162497	1	7.27282	8.8	83.3	1	K.DIAAHIKK.E
	2016-11-16-hjk-Sharma-Shalini-SL3-mut.14409.14409.3	3.7414	0.5079	100	1530.77	1530.76	1.1	3462943	1	9.99231	9.16	56.8	1	K.KYNPTWHCIVGR.N
	2016-11-16-hjk-Sharma-Shalini-SL3-mut.12010.12010.2	2.5318	0.5697	100	1282.61	1282.61	-1	6584371	1	9.51791	7.33	65	1	R.NFGSYVTHETK.H
P22626	21	25	0.586	353	37430	8.9	U	0.0077285	2.85478	Heterogeneous nuclear ribonucleoproteins A2/B1 OS=Homo sapiens GN=HNRNPA2B1 PE=1 SV=2	0	25	0
*	2016-11-16-hjk-Sharma-Shalini-SL3-mut.16215.16215.2	1.9469	0.4314	100	1057.59	1057.59	-0.2	6.35874e+06	1	9.10299	4.46	68.8	1	K.TLETVPLER.K
*	2016-11-16-hjk-Sharma-Shalini-SL3-mut.29736.29736.2	5.0171	0.6546	100	1798.93	1798.92	6	5.54668e+06	1	12.3589	4.14	69	1	K.LFIGGLSFETTEESLR.N
*	2016-11-16-hjk-Sharma-Shalini-SL3-mut.15723.15723.2	1.8156	0.4445	99.8	1087.48	1087.48	-0.7	6357242	1	9.88389	6.56	64.3	1	R.NYYEQWGK.L
*	2016-11-16-hjk-Sharma-Shalini-SL3-mut.13014.13014.2	4.3702	0.5098	100	1491.73	1491.73	0.7	3.26869e+06	1	9.14253	6.56	79.2	2	K.LTDCVVMRDPASK.R
*	2016-11-16-hjk-Sharma-Shalini-SL3-mut.13110.13110.3	2.5902	0.3528	99	1491.73	1491.73	-1.1	8.00874e+06	1	6.95109	6.56	28.3	1	K.LTDCVVMRDPASK.R
*	2016-11-16-hjk-Sharma-Shalini-SL3-mut.3959.3959.2	2.2757	0.509	99.8	1338.7	1338.7	2.3	958528	1	7.95687	7.33	71.4	1	R.EESGKPGAHVTVK.K
*	2016-11-16-hjk-Sharma-Shalini-SL3-mut.19511.19511.3	5.3358	0.1658	99.7	2196.95	2196.95	1.1	8716991	1	8.4573	4.53	56.2	1	K.EDTEEHHLRDYFEEYGK.I
*	2016-11-16-hjk-Sharma-Shalini-SL3-mut.19521.19521.4	3.1786	0.2821	99	2196.95	2196.95	1.2	6.22835e+06	1	6.17297	4.53	17.9	1	K.EDTEEHHLRDYFEEYGK.I
*	2016-11-16-hjk-Sharma-Shalini-SL3-mut.23137.23137.2	3.1733	0.4807	100	1188.65	1188.65	1.4	27176990	1	9.29297	4.14	66.7	1	K.IDTIEIITDR.Q
*	2016-11-16-hjk-Sharma-Shalini-SL3-mut.21592.21592.3	5.3852	0.6463	100	1851.87	1851.87	0.9	19219960	1	14.4693	4.89	60.7	1	K.RGFGFVTFDDHDPVDK.I
*	2016-11-16-hjk-Sharma-Shalini-SL3-mut.24274.24274.2	4.8966	0.6654	100	1695.76	1695.76	-1.3	4.15273e+06	1	14.1171	4.4	65.4	1	R.GFGFVTFDDHDPVDK.I
*	2016-11-16-hjk-Sharma-Shalini-SL3-mut.24271.24271.3	2.7542	0.5986	100	1695.76	1695.76	-0.1	4180016	1	11.3266	4.4	33.3	1	R.GFGFVTFDDHDPVDK.I
*	2016-11-16-hjk-Sharma-Shalini-SL3-mut.5864.5864.2	2.4098	0.5295	100	1410.69	1410.69	-0.6	1166519	1	10.1169	7.41	63.2	1	K.YHTINGHNAEVR.K
*	2016-11-16-hjk-Sharma-Shalini-SL3-mut.4554.4554.2	2.7384	0.4624	100	1538.78	1538.78	1.3	637641	1	10.6732	8.8	36.4	1	K.YHTINGHNAEVRK.A
*	2016-11-16-hjk-Sharma-Shalini-SL3-mut.4545.4545.3	2.7837	0.595	100	1538.78	1538.78	0.9	5136833	1	11.0888	8.8	40	1	K.YHTINGHNAEVRK.A
*	2016-11-16-hjk-Sharma-Shalini-SL3-mut.10650.10650.3	2.5608	0.4231	99.7	1648.81	1648.81	0.6	1.11074e+06	1	7.90534	6.56	31.9	1	K.ALSRQEMQEVQSSR.S
*	2016-11-16-hjk-Sharma-Shalini-SL3-mut.6471.6471.2	3.2475	0.406	100	1221.55	1221.55	-0.9	6986387	1	10.8762	4.46	66.7	1	R.QEMQEVQSSR.S
*	2016-11-16-hjk-Sharma-Shalini-SL3-mut.14567.14567.2	2.2292	0.4343	100	1013.44	1013.44	1.4	3.64426e+06	1	7.13046	6.56	68.8	2	R.GGNFGFGDSR.G
*	2016-11-16-hjk-Sharma-Shalini-SL3-mut.14709.14709.2	3.2643	0.54	100	1377.63	1377.63	1.7	2517142	1	10.7647	10.06	73.9	1	R.GGGGNFGPGPGSNFR.G
*	2016-11-16-hjk-Sharma-Shalini-SL3-mut.20397.20397.2	5.5621	0.8737	100	2495.04	2495.04	-0.1	1.60218e+06	1	22.0785	6.56	61.9	2	R.GFGDGYNGYGGGPGGGNFGGSPGYGGGR.G
*	2016-11-16-hjk-Sharma-Shalini-SL3-mut.15029.15029.2	7.0164	0.8122	100	2189.91	2189.91	1	6330916	1	20.3348	8.64	70.7	2	R.NMGGPYGGGNYGPGGSGGSGGYGGR.S
P04075	30	52	0.585	364	39420	8.1	U	0.0155895	2.84592	Fructose-bisphosphate aldolase A OS=Homo sapiens GN=ALDOA PE=1 SV=2	0	52	0
*	2016-11-16-hjk-Sharma-Shalini-SL3-mut.7779.7779.2	2.1546	0.4205	100	940.484	940.485	-1.1	3.25292e+06	1	9.32614	5.63	71.4	2	K.ELSDIAHR.I
*	2016-11-16-hjk-Sharma-Shalini-SL3-mut.16056.16056.2	3.1318	0.4868	100	1332.7	1332.7	-0.8	17388994	1	12.0076	4.46	65.2	3	K.GILAADESTGSIAK.R
*	2016-11-16-hjk-Sharma-Shalini-SL3-mut.13492.13492.2	3.4957	0.5486	100	1488.81	1488.8	2.4	1.95573e+06	1	12.3223	6.56	73.1	1	K.GILAADESTGSIAKR.L
*	2016-11-16-hjk-Sharma-Shalini-SL3-mut.6593.6593.3	4.1458	0.5839	100	1802.91	1802.91	0.5	181844960	1	9.92605	6.56	53.1	1	K.RLQSIGTENTEENRR.F
*	2016-11-16-hjk-Sharma-Shalini-SL3-mut.9826.9826.2	3.3972	0.5979	100	1490.71	1490.71	-1.2	3.18712e+06	1	11.8409	4.14	60.9	1	R.LQSIGTENTEENR.R
*	2016-11-16-hjk-Sharma-Shalini-SL3-mut.16694.16694.2	2.4768	0.4913	100	1044.57	1044.57	-0.9	145332016	1	11.4945	4.46	68.8	1	R.QLLLTADDR.V
*	2016-11-16-hjk-Sharma-Shalini-SL3-mut.29243.29243.3	7.1936	0.65	100	3114.66	3113.65	2.1	2.15734e+06	1	12.7397	5.8	38.5	1	R.QLLLTADDRVNPCIGGVILFHETLYQK.A
*	2016-11-16-hjk-Sharma-Shalini-SL3-mut.29226.29226.4	5.6923	0.4135	99.9	3113.66	3113.65	3.4	4352958	1	9.39595	5.8	18.5	1	R.QLLLTADDRVNPCIGGVILFHETLYQK.A
*	2016-11-16-hjk-Sharma-Shalini-SL3-mut.26410.26410.3	5.7157	0.6056	100	2089.1	2088.09	-0.4	5220824	1	10.9224	7.11	37.3	1	R.VNPCIGGVILFHETLYQK.A
*	2016-11-16-hjk-Sharma-Shalini-SL3-mut.16240.16240.2	3.0179	0.2743	100	1342.71	1342.71	-2.3	2.9791e+06	1	6.25104	6.56	55	2	K.ADDGRPFPQVIK.S
*	2016-11-16-hjk-Sharma-Shalini-SL3-mut.22654.22654.2	5.8623	0.7294	100	2272.14	2272.14	-1.8	11298821	1	17.6466	4.14	57.5	3	K.GVVPLAGTNGETTTQGLDGLSER.C
*	2016-11-16-hjk-Sharma-Shalini-SL3-mut.22706.22706.3	3.2754	0.5315	99.8	2272.14	2272.14	-1.8	3.18885e+06	1	9.03428	4.14	24.2	1	K.GVVPLAGTNGETTTQGLDGLSER.C
*	2016-11-16-hjk-Sharma-Shalini-SL3-mut.26920.26920.2	5.6934	0.5538	100	2107.1	2107.1	-0.3	3133496	1	14.5485	5.63	75	1	K.IGEHTPSALAIMENANVLAR.Y
*	2016-11-16-hjk-Sharma-Shalini-SL3-mut.26866.26866.3	4.974	0.4909	100	2107.1	2107.1	0.3	5287651	1	10.0589	5.63	44.1	4	K.IGEHTPSALAIMENANVLAR.Y
	2016-11-16-hjk-Sharma-Shalini-SL3-mut.27299.27299.2	4.607	0.6038	100	3020.49	3020.5	-4.9	1.05347e+06	1	11.1358	4.25	28.9	2	R.YASICQQNGIVPIVEPEILPDGDHDLK.R
	2016-11-16-hjk-Sharma-Shalini-SL3-mut.27229.27229.3	6.0561	0.6067	100	3020.51	3020.5	3.2	5.18319e+06	1	11.57	4.25	41.5	4	R.YASICQQNGIVPIVEPEILPDGDHDLK.R
	2016-11-16-hjk-Sharma-Shalini-SL3-mut.25817.25817.4	4.4312	0.5515	99.4	3177.59	3176.6	-4.8	3696424	1	8.77904	4.58	19.2	1	R.YASICQQNGIVPIVEPEILPDGDHDLKR.C
*	2016-11-16-hjk-Sharma-Shalini-SL3-mut.20771.20771.3	4.2748	0.5494	100	1709.92	1709.92	1	3.67939e+06	1	10.0284	6.51	48.9	3	K.ALSDHHIYLEGTLLK.P
*	2016-11-16-hjk-Sharma-Shalini-SL3-mut.19849.19849.4	6.7655	0.6953	100	3131.58	3131.58	0.9	3.49309e+06	1	13.5749	7.49	30.2	1	K.ALSDHHIYLEGTLLKPNMVTPGHACTQK.F
*	2016-11-16-hjk-Sharma-Shalini-SL3-mut.20582.20582.5	4.8034	0.5644	99.7	3132.56	3131.58	-5	3.01879e+06	1	10.1801	7.49	21.2	3	K.ALSDHHIYLEGTLLKPNMVTPGHACTQK.F
*	2016-11-16-hjk-Sharma-Shalini-SL3-mut.19965.19965.6	3.5799	0.3825	99.9	3131.58	3131.58	0.9	13505596	1	7.06319	7.49	16.4	2	K.ALSDHHIYLEGTLLKPNMVTPGHACTQK.F
*	2016-11-16-hjk-Sharma-Shalini-SL3-mut.6451.6451.2	3.469	0.6244	100	1440.67	1440.67	-0.3	2.01102e+06	1	17.1236	8.23	73.9	1	K.PNMVTPGHACTQK.F
*	2016-11-16-hjk-Sharma-Shalini-SL3-mut.6445.6445.3	2.1686	0.4182	99.3	1440.67	1440.67	0.3	7048378	1	9.03451	8.23	27.5	2	K.PNMVTPGHACTQK.F
*	2016-11-16-hjk-Sharma-Shalini-SL3-mut.22886.22886.2	3.8244	0.4383	100	1675.85	1675.85	-0.2	11273607	1	11.2549	5.63	75	1	K.FSHEEIAMATVTALR.R
*	2016-11-16-hjk-Sharma-Shalini-SL3-mut.22848.22848.3	3.1262	0.4742	99.8	1675.85	1675.85	1.4	6948255	1	9.20233	5.63	40	2	K.FSHEEIAMATVTALR.R
*	2016-11-16-hjk-Sharma-Shalini-SL3-mut.21072.21072.3	2.5272	0.4091	99	1831.95	1831.95	1.4	33133366	1	7.18549	7.33	46.6	1	K.FSHEEIAMATVTALRR.T
	2016-11-16-hjk-Sharma-Shalini-SL3-mut.26362.26362.2	3.1925	0.6359	100	1197.61	1197.61	0.8	19232414	1	14.1646	9.08	76.5	2	K.PWALTFSYGR.A
*	2016-11-16-hjk-Sharma-Shalini-SL3-mut.7465.7465.2	4.2424	0.3308	100	1288.68	1288.68	-2.3	11018410	1	8.86521	9.35	95.5	2	K.RALANSLACQGK.Y
*	2016-11-16-hjk-Sharma-Shalini-SL3-mut.7497.7497.3	3.5849	0.6367	100	1288.68	1288.68	-1.9	32400216	1	10.1802	9.35	50	1	K.RALANSLACQGK.Y
*	2016-11-16-hjk-Sharma-Shalini-SL3-mut.10594.10594.2	2.1569	0.5827	100	1132.58	1132.58	0.8	31470350	1	12.7481	8.26	57.9	1	R.ALANSLACQGK.Y
P62988	4	7	0.566	76	8565	7.2	U	0.0100511	2.68129	Ubiquitin OS=Homo sapiens GN=RPS27A PE=1 SV=1	0	7	0
*	2016-11-16-hjk-Sharma-Shalini-SL3-mut.22900.22900.2	5.4275	0.5942	100	1787.93	1787.93	-0.6	6817100	1	10.6645	3.96	75	3	K.TITLEVEPSDTIENVK.A
*	2016-11-16-hjk-Sharma-Shalini-SL3-mut.6261.6261.2	1.4887	0.5889	99.5	1039.52	1039.52	0.6	7.2931e+06	1	10.788	4.46	53.3	1	K.EGIPPDQQR.L
*	2016-11-16-hjk-Sharma-Shalini-SL3-mut.12707.12707.2	1.6868	0.3237	99	1081.55	1081.55	0.6	175111280	1	8.55671	6.56	57.1	1	R.TLSDYNIQK.E
*	2016-11-16-hjk-Sharma-Shalini-SL3-mut.17361.17361.2	3.136	0.5832	100	1068.62	1067.62	-0.1	7934088	1	12.6787	7.33	100	2	K.ESTLHLVLR.L
Q9Y3F4	19	21	0.563	350	38438	5.1	U	0.00654758	2.65595	Serine-threonine kinase receptor-associated protein OS=Homo sapiens GN=STRAP PE=1 SV=1	0	21	0
*	2016-11-16-hjk-Sharma-Shalini-SL3-mut.27766.27766.3	3.093	0.4793	99.3	1631.79	1631.78	3	1.06114e+06	1	8.36571	5.63	41.5	1	R.QGDTGDWIGTFLGHK.G
*	2016-11-16-hjk-Sharma-Shalini-SL3-mut.16703.16703.2	2.0056	0.532	100	1016.55	1016.55	-0.8	2.99198e+06	1	7.59497	9.08	75	1	K.GAVWGATLNK.D
*	2016-11-16-hjk-Sharma-Shalini-SL3-mut.10630.10630.2	2.8381	0.5111	100	1037.53	1037.53	1.4	9507453	1	13.4892	6.56	68.4	1	K.AATAAADFTAK.V
*	2016-11-16-hjk-Sharma-Shalini-SL3-mut.25329.25329.2	4.3884	0.6091	100	1771.87	1771.87	-0.4	2.44024e+06	1	12.4578	4.72	73.1	1	K.VWDAVSGDELMTLAHK.H
*	2016-11-16-hjk-Sharma-Shalini-SL3-mut.25302.25302.3	3.5243	0.4301	100	1771.87	1771.87	0.1	3.54258e+06	1	7.50111	4.72	30.9	1	K.VWDAVSGDELMTLAHK.H
*	2016-11-16-hjk-Sharma-Shalini-SL3-mut.24753.24753.2	5.2316	0.6421	100	2001.94	2001.94	1.3	19523836	1	13.7987	4.14	59.4	1	K.TVDFTQDSNYLLTGGQDK.L
*	2016-11-16-hjk-Sharma-Shalini-SL3-mut.11669.11669.2	3.7034	0.4594	100	1416.73	1416.74	-2.5	2160734	1	8.69757	4.72	72.7	1	R.IYDLNKPEAEPK.E
*	2016-11-16-hjk-Sharma-Shalini-SL3-mut.13872.13872.2	1.5355	0.3806	99.1	1008.45	1008.45	-0.2	11374312	1	6.63593	4.46	63.6	1	K.ALWCSEDK.Q
*	2016-11-16-hjk-Sharma-Shalini-SL3-mut.15124.15124.2	3.3237	0.3108	100	1330.65	1330.65	2.2	4.18557e+06	1	9.1343	5.63	78.9	1	R.LWDHATMTEVK.S
*	2016-11-16-hjk-Sharma-Shalini-SL3-mut.21746.21746.2	3.4988	0.4774	100	1484.81	1484.81	-1.2	1.99437e+06	1	8.8129	7.33	73.9	1	R.SIAFHSAVSLDPIK.S
*	2016-11-16-hjk-Sharma-Shalini-SL3-mut.17331.17331.2	4.2598	0.5688	100	1798.9	1798.9	0	2462756	1	14.0495	5.63	62.1	1	K.SFEAPATINSASLHPEK.E
*	2016-11-16-hjk-Sharma-Shalini-SL3-mut.17322.17322.3	2.3568	0.3834	99.3	1798.9	1798.9	0	1.66178e+06	1	9.4371	5.63	18.6	1	K.SFEAPATINSASLHPEK.E
*	2016-11-16-hjk-Sharma-Shalini-SL3-mut.21761.21761.2	2.2749	0.519	99.9	1211.59	1211.59	-2.5	12298604	1	8.60255	4.14	55.6	2	K.EFLVAGGEDFK.L
*	2016-11-16-hjk-Sharma-Shalini-SL3-mut.17257.17257.2	4.0539	0.8133	100	1596.67	1596.67	-1.5	12045182	1	18.3105	3.96	60.9	1	K.YDYNSGEELESYK.G
*	2016-11-16-hjk-Sharma-Shalini-SL3-mut.20589.20589.2	5.1128	0.6975	100	1900.85	1900.86	-1	2.86912e+06	1	16.2274	3.96	59.4	2	R.FSPDGELYASGSEDGTLR.L
*	2016-11-16-hjk-Sharma-Shalini-SL3-mut.16894.16894.2	2.2143	0.3821	100	930.54	930.541	-1.2	9439374	1	6.69496	9.08	64.3	1	R.LWQTVVGK.T
*	2016-11-16-hjk-Sharma-Shalini-SL3-mut.16443.16443.2	2.7648	0.4411	100	1446.68	1446.68	-1.2	5086708	1	8.63142	3.96	76.2	1	K.CVLPEEDSGELAK.P
*	2016-11-16-hjk-Sharma-Shalini-SL3-mut.14493.14493.2	2.5196	0.3695	99.9	1671.83	1671.83	1.5	1.11921e+06	1	7.22846	4.4	52	1	K.CVLPEEDSGELAKPK.I
*	2016-11-16-hjk-Sharma-Shalini-SL3-mut.14549.14549.3	3.5389	0.5644	100	1671.83	1671.83	0.7	4.40144e+06	1	9.96947	4.4	53.2	1	K.CVLPEEDSGELAKPK.I
P05387	3	4	0.557	115	11665	4.5	U	0.0037957	2.60579	60S acidic ribosomal protein P2 OS=Homo sapiens GN=RPLP2 PE=1 SV=1	0	4	0
*	2016-11-16-hjk-Sharma-Shalini-SL3-mut.29556.29556.2	3.8243	0.626	100	1868.98	1868.98	3.5	1.76861e+06	1	13.2332	8.64	64.5	1	R.YVASYLLAALGGNSSPSAK.D
*	2016-11-16-hjk-Sharma-Shalini-SL3-mut.25781.25781.2	3.1113	0.4629	100	1256.69	1256.68	0.8	3.13088e+06	1	10.3276	4.46	72.7	1	K.NIEDVIAQGIGK.L
*	2016-11-16-hjk-Sharma-Shalini-SL3-mut.18278.18278.2	5.3311	0.7444	100	2775.44	2774.43	0.7	2126421	1	17.1285	4.46	47.8	2	K.LASVPAGGAVAVSAAPGSAAPAAGSAPAAAEEK.K
P00558	21	26	0.549	417	44615	8.1	U	0.00680405	2.53997	Phosphoglycerate kinase 1 OS=Homo sapiens GN=PGK1 PE=1 SV=3	0	26	0
	2016-11-16-hjk-Sharma-Shalini-SL3-mut.18897.18897.2	1.9053	0.4346	99.6	949.483	949.481	1.7	1.88134e+06	1	7.07609	6.56	69.2	2	R.VDFNVPMK.N
*	2016-11-16-hjk-Sharma-Shalini-SL3-mut.11942.11942.2	2.2109	0.5877	100	924.423	924.424	-1.3	7.7409e+06	1	8.25465	6.56	64.3	1	K.FCLDNGAK.S
*	2016-11-16-hjk-Sharma-Shalini-SL3-mut.19743.19743.3	4.7318	0.5306	100	2035.05	2035.05	1.1	5.33581e+06	1	10.1584	7.33	40.7	2	K.SVVLMSHLGRPDGVPMPDK.Y
*	2016-11-16-hjk-Sharma-Shalini-SL3-mut.23333.23333.2	2.7972	0.6259	100	1247.69	1247.69	2.1	26161810	1	14.9314	4.46	68.4	1	K.YSLEPVAVELK.S
*	2016-11-16-hjk-Sharma-Shalini-SL3-mut.28661.28661.2	5.2223	0.5325	100	1768.94	1768.94	3.5	17808584	1	14.603	6.56	86.2	2	K.ACANPAAGSVILLENLR.F
	2016-11-16-hjk-Sharma-Shalini-SL3-mut.19574.19574.2	3.8191	0.6386	100	1634.79	1634.79	-0.5	5.77832e+06	1	14.1719	5.63	73.9	1	K.LGDVYVNDAFGTAHR.A
	2016-11-16-hjk-Sharma-Shalini-SL3-mut.19549.19549.3	4.2775	0.5214	100	1634.79	1634.79	0.7	3850751	1	11.471	5.63	56	2	K.LGDVYVNDAFGTAHR.A
*	2016-11-16-hjk-Sharma-Shalini-SL3-mut.13212.13212.2	4.2044	0.7226	100	1367.71	1367.71	-0.5	21804400	1	19.4139	9.08	95.2	1	R.AHSSMVGVNLPQK.A
*	2016-11-16-hjk-Sharma-Shalini-SL3-mut.16000.16000.2	1.9475	0.3864	99.4	884.449	884.451	-2.5	7.25372e+06	1	6.91684	6.56	75	1	K.ELNYFAK.A
*	2016-11-16-hjk-Sharma-Shalini-SL3-mut.27668.27668.2	4.0205	0.4699	100	1768.99	1769	-5.7	2411600	1	9.08007	6.56	60	1	K.ALESPERPFLAILGGAK.V
*	2016-11-16-hjk-Sharma-Shalini-SL3-mut.27709.27709.3	3.324	0.5504	100	1769	1769	0.8	6.9568e+06	1	10.0146	6.56	33.3	1	K.ALESPERPFLAILGGAK.V
*	2016-11-16-hjk-Sharma-Shalini-SL3-mut.23436.23436.2	2.6438	0.4526	100	1201.66	1201.66	0	17837536	1	8.30172	6.56	61.1	1	K.IQLINNMLDK.V
*	2016-11-16-hjk-Sharma-Shalini-SL3-mut.26646.26646.2	5.7437	0.5416	100	1966.94	1966.94	-1.5	8799311	1	16.9396	3.96	66.7	1	K.VLNNMEIGTSLFDEEGAK.I
*	2016-11-16-hjk-Sharma-Shalini-SL3-mut.27009.27009.2	2.814	0.6253	100	1318.73	1318.73	1	6.6184e+06	1	12.3964	4.46	54.5	1	K.ITLPVDFVTADK.F
*	2016-11-16-hjk-Sharma-Shalini-SL3-mut.26738.26738.3	3.7835	0.62	100	2024.04	2023.04	-0.8	1734368	1	11.909	4.4	28.8	1	K.ITLPVDFVTADKFDENAK.T
*	2016-11-16-hjk-Sharma-Shalini-SL3-mut.24066.24066.3	6.4011	0.7097	100	2605.24	2605.24	2.1	4125812	1	17.7761	6.56	42	2	K.TGQATVASGIPAGWMGLDCGPESSKK.Y
*	2016-11-16-hjk-Sharma-Shalini-SL3-mut.5130.5130.2	1.8918	0.4695	100	937.511	937.51	1	3.27274e+06	1	7.99899	8.8	64.3	1	K.KYAEAVTR.A
*	2016-11-16-hjk-Sharma-Shalini-SL3-mut.6399.6399.2	1.5302	0.394	99.1	809.415	809.415	-0.5	5.31858e+06	1	7.37911	6.56	58.3	1	K.YAEAVTR.A
*	2016-11-16-hjk-Sharma-Shalini-SL3-mut.17199.17199.2	4.4979	0.6157	100	1754.79	1754.79	1.4	5.68624e+06	1	16.0584	5.69	74.1	1	R.GCITIIGGGDTATCCAK.W
	2016-11-16-hjk-Sharma-Shalini-SL3-mut.19293.19293.2	4.7267	0.6969	100	1740.91	1740.91	-2.1	2663475	1	16.0127	5.63	83.3	1	K.VSHVSTGGGASLELLEGK.V
	2016-11-16-hjk-Sharma-Shalini-SL3-mut.19258.19258.3	2.9372	0.5035	100	1740.91	1740.91	-0.6	3.10123e+06	1	10.4584	5.63	31.2	1	K.VSHVSTGGGASLELLEGK.V
P05455	35	68	0.529	408	46837	7.1	U	0.0181877	2.38065	Lupus La protein OS=Homo sapiens GN=SSB PE=1 SV=2	0	68	0
*	2016-11-16-hjk-Sharma-Shalini-SL3-mut.27555.27555.2	6.1827	0.7787	100	2071.96	2071.97	-3.8	25411890	1	23.0019	5.63	80	2	K.ICHQIEYYFGDFNLPR.D
*	2016-11-16-hjk-Sharma-Shalini-SL3-mut.27531.27531.3	4.6596	0.6178	100	2071.97	2071.97	-1.1	11585478	1	14.7878	5.63	44.7	2	K.ICHQIEYYFGDFNLPR.D
*	2016-11-16-hjk-Sharma-Shalini-SL3-mut.13682.13682.2	4.5642	0.6041	100	1379.67	1379.67	0.7	5463215	1	12.4806	4.4	100	2	K.SKAELMEISEDK.T
*	2016-11-16-hjk-Sharma-Shalini-SL3-mut.16759.16759.2	2.5213	0.6222	100	1164.54	1164.55	-0.4	179376480	1	11.7537	3.96	66.7	1	K.AELMEISEDK.T
*	2016-11-16-hjk-Sharma-Shalini-SL3-mut.11656.11656.2	4.8031	0.4291	100	1745.9	1745.91	-1.3	2.3066e+06	1	11.4639	6.56	64.3	1	R.RSPSKPLPEVTDEYK.N
*	2016-11-16-hjk-Sharma-Shalini-SL3-mut.11715.11715.3	3.6409	0.4385	100	1745.91	1745.91	-0.5	138169904	1	10.0062	6.56	45.7	1	R.RSPSKPLPEVTDEYK.N
*	2016-11-16-hjk-Sharma-Shalini-SL3-mut.12264.12264.4	3.4563	0.4296	99	2202.15	2202.14	3.4	2.93754e+06	1	8.77908	6.34	21.9	1	R.RSPSKPLPEVTDEYKNDVK.N
*	2016-11-16-hjk-Sharma-Shalini-SL3-mut.13794.13794.2	4.9462	0.6711	100	1590.81	1589.81	-1.8	4038665	1	13.9603	4.72	79.2	2	R.SPSKPLPEVTDEYK.N
*	2016-11-16-hjk-Sharma-Shalini-SL3-mut.13820.13820.3	3.1436	0.5282	100	1589.81	1589.81	0.2	54245236	1	10.9962	4.72	30.2	2	R.SPSKPLPEVTDEYK.N
*	2016-11-16-hjk-Sharma-Shalini-SL3-mut.14445.14445.3	5.036	0.5457	99.4	2047.03	2046.04	-6.1	1.86833e+06	1	10.8308	4.89	27.3	2	R.SPSKPLPEVTDEYKNDVK.N
*	2016-11-16-hjk-Sharma-Shalini-SL3-mut.16828.16828.2	2.0485	0.3859	100	1190.59	1190.59	-0.5	11682726	1	10.2032	4.14	58.8	2	K.PLPEVTDEYK.N
*	2016-11-16-hjk-Sharma-Shalini-SL3-mut.22119.22119.2	2.5253	0.4033	99.7	1292.64	1292.64	2.9	107528000	1	9.6819	4.14	57.9	7	K.GFPTDATLDDIK.E
*	2016-11-16-hjk-Sharma-Shalini-SL3-mut.23544.23544.2	4.4433	0.5716	100	1858.95	1858.95	3.5	2.67163e+06	1	12.4867	4.72	84	1	K.EWLEDKGQVLNIQMR.R
*	2016-11-16-hjk-Sharma-Shalini-SL3-mut.23531.23531.3	3.9803	0.5553	100	1859.95	1858.95	0.2	4350953	1	8.65978	4.72	43.2	1	K.EWLEDKGQVLNIQMR.R
*	2016-11-16-hjk-Sharma-Shalini-SL3-mut.18050.18050.2	2.4493	0.4928	100	1058.57	1058.58	-2.5	16191448	1	10.476	10.06	66.7	1	K.GQVLNIQMR.R
*	2016-11-16-hjk-Sharma-Shalini-SL3-mut.28310.28310.2	4.4303	0.637	100	1626.87	1626.87	0.5	6028029	1	12.7717	6.56	70.8	3	K.GSIFVVFDSIESAKK.F
*	2016-11-16-hjk-Sharma-Shalini-SL3-mut.28311.28311.3	2.7112	0.571	99.8	1626.88	1626.87	2	510444	1	9.11665	6.56	31.8	1	K.GSIFVVFDSIESAKK.F
*	2016-11-16-hjk-Sharma-Shalini-SL3-mut.6525.6525.2	2.8172	0.5263	100	1033.57	1033.57	0.7	138078176	1	7.88532	8.8	75	2	K.KFVETPGQK.Y
*	2016-11-16-hjk-Sharma-Shalini-SL3-mut.27998.27998.2	3.8437	0.4411	100	1382.79	1382.79	0.4	26783170	1	13.5799	6.56	94.4	1	K.YKETDLLILFK.D
*	2016-11-16-hjk-Sharma-Shalini-SL3-mut.7292.7292.2	2.4433	0.474	100	1220.58	1220.58	-2.4	154881552	1	10.912	4.4	66.7	2	K.QKLEEDAEMK.S
*	2016-11-16-hjk-Sharma-Shalini-SL3-mut.7293.7293.3	2.4568	0.3909	99	1220.58	1220.58	-1.8	26361606	1	9.34565	4.4	37.5	1	K.QKLEEDAEMK.S
*	2016-11-16-hjk-Sharma-Shalini-SL3-mut.11612.11612.2	3.6821	0.7236	100	1313.54	1313.54	0	21416666	1	12.4263	4.14	75	2	K.FSGDLDDQTCR.E
*	2016-11-16-hjk-Sharma-Shalini-SL3-mut.23891.23891.3	7.4638	0.6676	100	2946.36	2946.37	-4.1	6.75081e+06	1	15.3292	4.7	35.6	1	K.FSGDLDDQTCREDLHILFSNHGEIK.W
*	2016-11-16-hjk-Sharma-Shalini-SL3-mut.23866.23866.4	4.9604	0.5635	100	2946.37	2946.37	0.4	10460928	1	9.73173	4.7	17.7	2	K.FSGDLDDQTCREDLHILFSNHGEIK.W
*	2016-11-16-hjk-Sharma-Shalini-SL3-mut.23865.23865.5	3.7937	0.5545	100	2946.37	2946.37	-0.3	2.75231e+06	1	10.619	4.7	11.5	1	K.FSGDLDDQTCREDLHILFSNHGEIK.W
*	2016-11-16-hjk-Sharma-Shalini-SL3-mut.20260.20260.2	4.0199	0.5555	100	1651.85	1651.84	1.2	3.70124e+06	1	12.0506	5.52	73.9	1	R.EDLHILFSNHGEIK.W
*	2016-11-16-hjk-Sharma-Shalini-SL3-mut.20240.20240.3	4.8654	0.6575	100	1651.84	1651.84	0.5	11883615	1	11.2888	5.52	46	4	R.EDLHILFSNHGEIK.W
*	2016-11-16-hjk-Sharma-Shalini-SL3-mut.22904.22904.2	1.9745	0.1966	99.5	819.498	819.497	0.8	10745710	1	6.80701	6.56	83.3	1	K.EGIILFK.E
*	2016-11-16-hjk-Sharma-Shalini-SL3-mut.10960.10960.2	2.8895	0.6129	100	1114.56	1114.56	2.1	3186469	1	12.0622	6.56	66.7	2	K.DANNGNLQLR.N
*	2016-11-16-hjk-Sharma-Shalini-SL3-mut.26609.26609.2	4.4656	0.5406	100	1546.76	1546.76	0.7	10858523	1	11.5692	3.86	86.4	5	K.EVTWEVLEGEVEK.E
*	2016-11-16-hjk-Sharma-Shalini-SL3-mut.8371.8371.2	5.1805	0.5371	100	1444.76	1444.76	-1.6	89703392	1	10.8575	4.72	90.9	2	K.KIIEDQQESLNK.W
*	2016-11-16-hjk-Sharma-Shalini-SL3-mut.10003.10003.2	3.5445	0.5513	100	1316.67	1316.67	0	21821848	1	9.18744	4.14	80	4	K.IIEDQQESLNK.W
*	2016-11-16-hjk-Sharma-Shalini-SL3-mut.7048.7048.2	4.8185	0.8083	100	2169.9	2169.9	0.8	1.6017e+06	1	16.2898	4.28	57.6	1	K.FASDDEHDEHDENGATGPVK.R
*	2016-11-16-hjk-Sharma-Shalini-SL3-mut.7020.7020.3	4.252	0.7766	100	2169.91	2169.9	4.5	2.2932e+06	1	12.9265	4.28	38.3	3	K.FASDDEHDEHDENGATGPVK.R
*	2016-11-16-hjk-Sharma-Shalini-SL3-mut.2530.2530.2	3.209	0.6121	100	1262.58	1262.57	0.3	3.90248e+06	1	12.0175	4.25	77.8	1	R.EETDKEEPASK.Q
Q96AE4	32	57	0.516	644	67560	7.6	U	0.0096587	2.28095	Far upstream element-binding protein 1 OS=Homo sapiens GN=FUBP1 PE=1 SV=3	0	57	0
*	2016-11-16-hjk-Sharma-Shalini-SL3-mut.17094.17094.2	3.2289	0.3519	100	1974.88	1973.88	-1.3	2.40852e+06	1	8.26102	4.46	45.2	2	K.IGGDAGTSLNSNDYGYGGQK.R
*	2016-11-16-hjk-Sharma-Shalini-SL3-mut.5488.5488.2	3.0496	0.5152	100	1340.64	1340.64	-0.1	1.75064e+06	1	9.84341	4.4	77.3	2	K.RPLEDGDQPDAK.K
*	2016-11-16-hjk-Sharma-Shalini-SL3-mut.5535.5535.3	2.9373	0.551	100	1340.64	1340.64	-0.1	2215852	1	9.57671	4.4	44.4	1	K.RPLEDGDQPDAK.K
*	2016-11-16-hjk-Sharma-Shalini-SL3-mut.4176.4176.2	2.1541	0.3721	99.8	1468.74	1468.74	-0.7	655048	1	6.5446	4.89	42.9	1	K.RPLEDGDQPDAKK.V
*	2016-11-16-hjk-Sharma-Shalini-SL3-mut.16578.16578.3	3.1155	0.5901	100	2366.13	2366.13	0.2	5.18696e+06	1	9.81642	7.33	38.7	4	K.VAPQNDSFGTQLPPMHQQQSR.S
*	2016-11-16-hjk-Sharma-Shalini-SL3-mut.29464.29464.2	3.0038	0.427	100	2229.11	2228.11	-0.1	1.47006e+06	1	8.81372	4.72	46.4	1	R.SVMTEEYKVPDGMVGFIIGR.G
*	2016-11-16-hjk-Sharma-Shalini-SL3-mut.29421.29421.3	5.1563	0.5336	100	2228.11	2228.11	0.9	2.73573e+06	1	13.2272	4.72	40	2	R.SVMTEEYKVPDGMVGFIIGR.G
*	2016-11-16-hjk-Sharma-Shalini-SL3-mut.28167.28167.2	3.3366	0.5488	100	1260.68	1260.68	2.9	3.52042e+06	1	12.9432	6.56	76.2	2	K.VPDGMVGFIIGR.G
*	2016-11-16-hjk-Sharma-Shalini-SL3-mut.17142.17142.2	2.8228	0.4852	100	1352.72	1352.72	-0.3	7.30483e+06	1	8.88534	4.46	56.5	2	K.IQIAPDSGGLPER.S
*	2016-11-16-hjk-Sharma-Shalini-SL3-mut.14670.14670.2	4.4713	0.654	100	1595.74	1595.74	0.9	4967819	1	15.3297	6.56	79.2	2	R.SCMLTGTPESVQSAK.R
*	2016-11-16-hjk-Sharma-Shalini-SL3-mut.15906.15906.2	2.8554	0.3007	100	1113.66	1113.66	-0.9	5047212	1	5.77458	6.56	93.8	2	K.RLLDQIVEK.G
*	2016-11-16-hjk-Sharma-Shalini-SL3-mut.17795.17795.3	4.8743	0.5796	100	2640.31	2640.31	-1.7	2.50135e+06	1	10.1239	7.41	36.4	1	K.GRPAPGFHHGDGPGNAVQEIMIPASK.A
*	2016-11-16-hjk-Sharma-Shalini-SL3-mut.17786.17786.4	5.2574	0.5626	100	2640.31	2640.31	0.9	35538860	1	10.6726	7.41	25.4	3	K.GRPAPGFHHGDGPGNAVQEIMIPASK.A
*	2016-11-16-hjk-Sharma-Shalini-SL3-mut.17739.17739.5	3.8485	0.3985	99.8	2640.31	2640.31	-0.6	3.67308e+06	1	7.32565	7.41	22.9	1	K.GRPAPGFHHGDGPGNAVQEIMIPASK.A
*	2016-11-16-hjk-Sharma-Shalini-SL3-mut.14756.14756.2	4.1089	0.6035	100	1604.74	1604.74	1	23376480	1	14.2396	4.46	65.4	2	K.MVMIQDGPQNTGADK.P
*	2016-11-16-hjk-Sharma-Shalini-SL3-mut.15566.15566.3	5.9274	0.6272	100	1971.98	1970.98	-1.4	6776704	1	12.9015	6.56	46.7	3	K.MVMIQDGPQNTGADKPLR.I
*	2016-11-16-hjk-Sharma-Shalini-SL3-mut.26985.26985.2	2.37	0.2976	99.5	1662.86	1662.86	-1.4	2.42685e+06	1	6.37131	4.72	44	1	K.EMVLELIRDQGGFR.E
*	2016-11-16-hjk-Sharma-Shalini-SL3-mut.21524.21524.2	3.8904	0.5955	100	1336.72	1336.72	0.1	43640420	1	12.0795	4.46	75	2	R.IGGNEGIDVPIPR.F
	2016-11-16-hjk-Sharma-Shalini-SL3-mut.23265.23265.2	2.292	0.5574	100	931.573	931.572	1	4490518	1	11.6104	10.06	68.8	2	R.FAVGIVIGR.N
	2016-11-16-hjk-Sharma-Shalini-SL3-mut.4061.4061.2	2.6784	0.2799	99.9	1000.55	1000.55	1.3	1.98058e+06	1	6.71872	9.08	68.8	1	K.KIQNDAGVR.I
	2016-11-16-hjk-Sharma-Shalini-SL3-mut.4936.4936.2	1.9563	0.3068	99.8	872.459	872.458	0.3	2.08524e+06	1	7.76189	6.56	57.1	1	K.IQNDAGVR.I
*	2016-11-16-hjk-Sharma-Shalini-SL3-mut.11683.11683.2	2.3552	0.418	100	1503.74	1503.74	-1.5	3.49427e+06	1	6.82777	4.72	45.5	1	R.IQFKPDDGTTPER.I
*	2016-11-16-hjk-Sharma-Shalini-SL3-mut.11746.11746.2	2.3981	0.3864	100	1067.58	1067.58	0.5	52890688	1	8.63497	6.56	61.1	3	R.IAQITGPPDR.C
*	2016-11-16-hjk-Sharma-Shalini-SL3-mut.26220.26220.2	4.5349	0.6911	100	1539.79	1539.79	-3.8	16319986	1	13.983	5.63	90.9	1	R.CQHAAEIITDLLR.S
*	2016-11-16-hjk-Sharma-Shalini-SL3-mut.26211.26211.3	2.8257	0.5409	100	1539.79	1539.79	-0.3	44391808	1	12.2878	5.63	41.3	1	R.CQHAAEIITDLLR.S
*	2016-11-16-hjk-Sharma-Shalini-SL3-mut.6127.6127.2	3.2235	0.4591	99.9	1307.65	1307.65	4.4	2.36418e+06	1	11.7032	10.06	88	1	R.SVQAGNPGGPGPGGR.G
*	2016-11-16-hjk-Sharma-Shalini-SL3-mut.6919.6919.2	2.7518	0.6093	100	1194.56	1194.56	2.2	1.39236e+06	1	12.1247	6.56	73.7	3	R.NPPPNADPNMK.L
*	2016-11-16-hjk-Sharma-Shalini-SL3-mut.10770.10770.2	2.1136	0.6292	100	1148.57	1148.57	0.4	22079736	1	12.968	6.56	52.9	2	R.GTPQQIDYAR.Q
	2016-11-16-hjk-Sharma-Shalini-SL3-mut.16381.16381.2	1.5931	0.5256	99.9	988.441	988.441	0.1	4700893	1	7.32709	4.46	63.6	1	K.AWEEYYK.K
*	2016-11-16-hjk-Sharma-Shalini-SL3-mut.23311.23311.3	5.2385	0.6278	100	3036.44	3036.43	3.9	3.82391e+06	1	11.7389	6.56	25.8	2	K.KMGQAVPAPTGAPPGGQPDYSAAWAEYYR.Q
*	2016-11-16-hjk-Sharma-Shalini-SL3-mut.25440.25440.2	4.2546	0.6718	100	2908.34	2908.34	1.4	7.46371e+06	1	17.347	4.46	51.2	2	K.MGQAVPAPTGAPPGGQPDYSAAWAEYYR.Q
*	2016-11-16-hjk-Sharma-Shalini-SL3-mut.15876.15876.2	5.069	0.6725	100	2581.18	2581.19	-2.7	2657889	1	19.3754	7.25	63.6	2	R.QQAAYYAQTSPQGMPQHPPAPQGQ.-
P80723	9	12	0.511	227	22693	4.6	U	0.0057688	2.2434	Brain acid soluble protein 1 OS=Homo sapiens GN=BASP1 PE=1 SV=2	0	12	0
*	2016-11-16-hjk-Sharma-Shalini-SL3-mut.9581.9581.3	3.6985	0.336	99.9	2298.14	2298.14	0.3	3.22214e+06	1	8.86869	4.4	42	2	K.AEPPKAPEQEQAAPGPAAGGEAPK.A
*	2016-11-16-hjk-Sharma-Shalini-SL3-mut.8435.8435.2	5.3159	0.6014	100	1775.86	1775.86	1.9	1.78442e+06	1	15.611	4.14	51.5	2	K.APEQEQAAPGPAAGGEAPK.A
*	2016-11-16-hjk-Sharma-Shalini-SL3-mut.10367.10367.2	4.3615	0.666	100	1966.93	1966.94	-4.3	1.61557e+06	1	18.68	3.96	52.9	1	K.AAEAAAAPAESAAPAAGEEPSK.E
*	2016-11-16-hjk-Sharma-Shalini-SL3-mut.10463.10463.2	2.4609	0.6209	99.9	2636.22	2636.23	-3.5	533455	1	13.104	4.03	31.6	1	K.AAEAAAAPAESAAPAAGEEPSKEEGEPK.K
*	2016-11-16-hjk-Sharma-Shalini-SL3-mut.10514.10514.3	5.6419	0.6696	100	2636.24	2636.23	1.1	5.56609e+06	1	16.3539	4.03	33.7	1	K.AAEAAAAPAESAAPAAGEEPSKEEGEPK.K
*	2016-11-16-hjk-Sharma-Shalini-SL3-mut.5399.5399.2	4.6738	0.3731	100	1412.74	1412.74	-1.2	1.32364e+06	1	11.9558	6.56	73.1	1	K.KTEAPAAPAAQETK.S
*	2016-11-16-hjk-Sharma-Shalini-SL3-mut.5043.5043.2	4.307	0.6375	100	1932.88	1932.88	-1	1.57202e+06	1	14.3998	4.72	53.8	1	K.SDGAPASDSKPGSSEAAPSSK.E
*	2016-11-16-hjk-Sharma-Shalini-SL3-mut.5025.5025.3	3.2588	0.4465	99.9	1932.88	1932.88	1.1	4216394	1	8.95086	4.72	30.6	1	K.SDGAPASDSKPGSSEAAPSSK.E
*	2016-11-16-hjk-Sharma-Shalini-SL3-mut.14133.14133.3	7.7213	0.73	100	2892.42	2892.42	-0.3	3996134	1	17.2993	4.25	34	2	K.AQGPAASAEEPKPVEAPAANSDQTVTVKE.-
Q15366	14	29	0.51	365	38580	6.8	U	0.00867032	2.23594	Poly(rC)-binding protein 2 OS=Homo sapiens GN=PCBP2 PE=1 SV=1	0	29	0
	2016-11-16-hjk-Sharma-Shalini-SL3-mut.12029.12029.2	1.7154	0.4162	99.6	802.466	802.467	-0.5	216964752	1	6.00918	6.56	57.1	1	K.EVGSIIGK.K
	2016-11-16-hjk-Sharma-Shalini-SL3-mut.11034.11034.2	3.2862	0.5841	100	1288.59	1288.6	-0.3	217522880	1	14.9561	4.46	55	2	R.INISEGNCPER.I
*	2016-11-16-hjk-Sharma-Shalini-SL3-mut.26250.26250.2	3.7947	0.591	100	1358.8	1358.8	-1.3	142191232	1	12.5959	9.08	65.2	1	R.IITLAGPTNAIFK.A
	2016-11-16-hjk-Sharma-Shalini-SL3-mut.20822.20822.2	1.8739	0.4655	100	908.491	908.491	-0.2	104426336	1	9.79379	6.56	69.2	1	K.AFAMIIDK.L
*	2016-11-16-hjk-Sharma-Shalini-SL3-mut.19622.19622.3	4.3688	0.5005	100	2462.22	2462.22	-0.1	16175294	1	10.601	4.72	31.7	2	K.LEEDISSSMTNSTAASRPPVTLR.L
	2016-11-16-hjk-Sharma-Shalini-SL3-mut.19033.19033.2	2.8157	0.5332	100	1428.79	1428.79	0.7	13301062	1	11.993	8.26	60.9	2	R.LVVPASQCGSLIGK.G
	2016-11-16-hjk-Sharma-Shalini-SL3-mut.20147.20147.2	5.8585	0.7162	100	2090.97	2089.98	-5.7	3.5442e+06	1	14.9693	4.14	71	11	R.ESTGAQVQVAGDMLPNSTER.A
*	2016-11-16-hjk-Sharma-Shalini-SL3-mut.27828.27828.2	4.9006	0.6573	100	1829.96	1829.95	3.4	4.16942e+06	1	12.0996	6.56	75	1	K.QICVVMLETLSQSPPK.G
*	2016-11-16-hjk-Sharma-Shalini-SL3-mut.19260.19260.3	4.0884	0.4751	100	2429.3	2429.29	1	2.51701e+06	1	10.0432	10.01	37.3	1	K.GVTIPYRPKPSSSPVIFAGGQDR.Y
*	2016-11-16-hjk-Sharma-Shalini-SL3-mut.16554.16554.2	4.363	0.5785	100	1417.71	1417.71	-0.6	12045556	1	13.2851	6.56	72	2	K.PSSSPVIFAGGQDR.Y
*	2016-11-16-hjk-Sharma-Shalini-SL3-mut.19406.19406.3	6.9316	0.6623	100	3383.59	3382.59	-3.4	3.95724e+06	1	16.008	6.77	26	1	K.LHQLAMQQSHFPMTHGNTGFSGIESSSPEVK.G
*	2016-11-16-hjk-Sharma-Shalini-SL3-mut.19386.19386.4	7.2717	0.6379	100	3382.6	3382.59	1.6	9443270	1	14.8819	6.77	20.7	1	K.LHQLAMQQSHFPMTHGNTGFSGIESSSPEVK.G
	2016-11-16-hjk-Sharma-Shalini-SL3-mut.6187.6187.2	1.825	0.2185	99.4	862.445	862.445	0.1	14565824	1	5.60849	9.08	64.3	1	R.QMSGAQIK.I
*	2016-11-16-hjk-Sharma-Shalini-SL3-mut.10341.10341.2	2.7824	0.6077	100	1158.58	1158.58	0.3	72271760	1	14.8982	4.46	63.2	2	K.IANPVEGSTDR.Q
P27695	14	20	0.509	318	35554	8.1	U	0.0068633	2.22849	DNA-(apurinic or apyrimidinic site) lyase OS=Homo sapiens GN=APEX1 PE=1 SV=2	0	20	0
*	2016-11-16-hjk-Sharma-Shalini-SL3-mut.8924.8924.3	6.3695	0.5233	100	1914.94	1914.94	2.2	2.31927e+06	1	10.7584	4.42	48.2	2	K.KGAVAEDGDELRTEPEAK.K
*	2016-11-16-hjk-Sharma-Shalini-SL3-mut.11022.11022.2	6.7849	0.5735	100	1786.85	1786.85	1.2	4480490	1	11.9988	4.12	82.8	2	K.GAVAEDGDELRTEPEAK.K
*	2016-11-16-hjk-Sharma-Shalini-SL3-mut.15003.15003.2	4.8587	0.6987	100	1786.81	1786.81	0.8	31000300	1	18.2607	3.86	73.3	2	K.EAAGEGPALYEDPPDQK.T
*	2016-11-16-hjk-Sharma-Shalini-SL3-mut.4295.4295.2	1.7736	0.301	99.4	1086.62	1086.62	0.1	2736753	1	6.64117	10.04	50	1	K.TSPSGKPATLK.I
*	2016-11-16-hjk-Sharma-Shalini-SL3-mut.20891.20891.2	2.5066	0.5397	100	1219.59	1219.59	1.4	5.43166e+06	1	10.3455	6.56	61.1	1	K.ICSWNVDGLR.A
*	2016-11-16-hjk-Sharma-Shalini-SL3-mut.22487.22487.2	3.2025	0.6602	100	1545.75	1545.75	-0.2	7.72453e+06	1	14.3299	3.96	63.6	1	K.EEAPDILCLQETK.C
*	2016-11-16-hjk-Sharma-Shalini-SL3-mut.25927.25927.3	5.7932	0.6909	100	3084.47	3084.47	-2.1	3.15741e+06	1	12.6732	4.89	33.3	1	K.CSENKLPAELQELPGLSHQYWSAPSDK.E
*	2016-11-16-hjk-Sharma-Shalini-SL3-mut.26881.26881.3	7.8949	0.7519	100	2467.23	2466.23	-0.8	5.01795e+06	1	16.0647	4.72	47.1	2	K.LPAELQELPGLSHQYWSAPSDK.E
*	2016-11-16-hjk-Sharma-Shalini-SL3-mut.19324.19324.2	2.6524	0.5545	100	1137.59	1137.59	-0.1	4183412	1	10.2424	6.56	65	2	K.EGYSGVGLLSR.Q
*	2016-11-16-hjk-Sharma-Shalini-SL3-mut.11105.11105.2	4.5052	0.6657	100	1690.73	1690.73	0.9	3.37905e+06	1	13.1912	4.25	80	1	K.VSYGIGDEEHDQEGR.V
*	2016-11-16-hjk-Sharma-Shalini-SL3-mut.12108.12108.3	2.6819	0.4264	99.8	1235.63	1235.63	0.6	9834423	1	8.14019	9.08	57.7	1	R.QRWDEAFRK.F
*	2016-11-16-hjk-Sharma-Shalini-SL3-mut.21021.21021.4	6.7027	0.6625	100	2530.35	2530.34	2.8	15621522	1	13.343	5.74	35.4	1	R.KPLVLCGDLNVAHEEIDLRNPK.G
*	2016-11-16-hjk-Sharma-Shalini-SL3-mut.21027.21027.5	3.2938	0.4659	99	2530.35	2530.34	3.4	2.37781e+06	1	7.46563	5.74	14.6	1	R.KPLVLCGDLNVAHEEIDLRNPK.G
*	2016-11-16-hjk-Sharma-Shalini-SL3-mut.8325.8325.2	2.0024	0.4751	99.9	1019.49	1019.49	-0.2	7676913	1	9.00548	6.56	62.5	2	K.NAGFTPQER.Q
P60174	11	11	0.506	249	26669	6.9	U	0.00482085	2.20627	Triosephosphate isomerase OS=Homo sapiens GN=TPI1 PE=1 SV=2	0	11	0
*	2016-11-16-hjk-Sharma-Shalini-SL3-mut.21517.21517.2	1.4449	0.4829	99.3	954.483	954.483	0.2	4440848	1	7.87096	9.08	57.1	1	K.FFVGGNWK.M
*	2016-11-16-hjk-Sharma-Shalini-SL3-mut.27727.27727.2	3.9457	0.2935	100	1414.79	1414.79	-1.6	2.14062e+06	1	10.5682	6.56	73.1	1	K.QSLGELIGTLNAAK.V
*	2016-11-16-hjk-Sharma-Shalini-SL3-mut.26886.26886.2	4.0422	0.5724	100	2193.07	2192.07	-2.8	4.41919e+06	1	12.4999	4.14	60	1	K.VPADTEVVCAPPTAYIDFAR.Q
*	2016-11-16-hjk-Sharma-Shalini-SL3-mut.22216.22216.2	4.4983	0.6191	100	1621.82	1621.83	-3.3	4.07986e+06	1	11.0509	6.56	70.4	1	K.VTNGAFTGEISPGMIK.D
*	2016-11-16-hjk-Sharma-Shalini-SL3-mut.19892.19892.2	4.3246	0.5779	100	1587.73	1586.74	-6	3.91114e+06	1	11.7511	5.63	75	1	K.DCGATWVVLGHSER.R
*	2016-11-16-hjk-Sharma-Shalini-SL3-mut.16889.16889.3	2.7707	0.3865	99.3	1742.84	1742.84	-1.2	3.26725e+06	1	6.44369	7.11	34.9	1	K.DCGATWVVLGHSERR.H
*	2016-11-16-hjk-Sharma-Shalini-SL3-mut.13505.13505.3	2.4659	0.4725	99.9	1614.82	1614.82	-0.7	3081769	1	6.46871	5.8	55.8	1	R.RHVFGESDELIGQK.V
*	2016-11-16-hjk-Sharma-Shalini-SL3-mut.16089.16089.2	4.7893	0.517	100	1458.72	1458.72	-3.8	8448206	1	16.6757	4.72	79.2	1	R.HVFGESDELIGQK.V
*	2016-11-16-hjk-Sharma-Shalini-SL3-mut.28226.28226.2	3.9672	0.6087	100	1602.88	1602.89	-4	3.99357e+06	1	14.0741	6.56	76	1	K.VVLAYEPVWAIGTGK.T
*	2016-11-16-hjk-Sharma-Shalini-SL3-mut.10137.10137.2	3.2559	0.6377	100	1234.6	1234.6	1.1	3.212e+06	1	14.5221	6.56	71.4	1	K.SNVSDAVAQSTR.I
*	2016-11-16-hjk-Sharma-Shalini-SL3-mut.13535.13535.2	3.1558	0.595	100	1326.67	1326.67	1.2	4219144	1	16.0295	8.26	50	1	R.IIYGGSVTGATCK.E
P62937	6	8	0.491	165	18012	7.8	U	0.00529098	2.09742	Peptidyl-prolyl cis-trans isomerase A OS=Homo sapiens GN=PPIA PE=1 SV=2	0	8	0
*	2016-11-16-hjk-Sharma-Shalini-SL3-mut.25261.25261.2	2.4395	0.3899	100	1055.54	1055.54	-0.3	5.5607e+06	1	9.96029	4.46	73.3	1	R.VSFELFADK.V
	2016-11-16-hjk-Sharma-Shalini-SL3-mut.24441.24441.2	2.5924	0.649	100	1598.75	1598.75	0.1	5.51557e+06	1	13.1831	6.56	54.2	2	R.IIPGFMCQGGDFTR.H
*	2016-11-16-hjk-Sharma-Shalini-SL3-mut.22451.22451.2	2.2568	0.3501	99.9	1154.57	1154.57	0.3	3.07201e+06	1	5.78085	4.14	68.8	1	K.FEDENFILK.H
*	2016-11-16-hjk-Sharma-Shalini-SL3-mut.25459.25459.3	8.858	0.6265	100	2791.33	2791.33	0.4	4.81269e+06	1	16.1993	8.23	40.2	2	K.HTGPGILSMANAGPNTNGSQFFICTAK.T
*	2016-11-16-hjk-Sharma-Shalini-SL3-mut.23778.23778.2	2.8837	0.4745	100	1278.58	1278.58	2	2949622	1	10.1298	4.14	83.3	1	K.EGMNIVEAMER.F
*	2016-11-16-hjk-Sharma-Shalini-SL3-mut.16723.16723.2	3.1183	0.5132	100	1247.63	1247.63	-1	5.70603e+06	1	8.99407	4.46	63.2	1	K.KITIADCGQLE.-
P53999	9	11	0.488	127	14395	9.6	U	0.0094519	2.0761	Activated RNA polymerase II transcriptional coactivator p15 OS=Homo sapiens GN=SUB1 PE=1 SV=3	0	11	0
*	2016-11-16-hjk-Sharma-Shalini-SL3-mut.4363.4363.2	1.6906	0.3959	99.3	995.589	995.588	0.9	1716485	1	7.53703	8.8	53.3	1	K.QVAPEKPVK.K
*	2016-11-16-hjk-Sharma-Shalini-SL3-mut.15501.15501.2	4.305	0.5154	100	1699.77	1699.77	-3.1	4280823	1	9.01552	6.56	53.6	1	K.QSSSSRDDNMFQIGK.M
*	2016-11-16-hjk-Sharma-Shalini-SL3-mut.15476.15476.3	3.1596	0.4849	100	1699.77	1699.77	1.1	8721230	1	8.00199	6.56	31.9	1	K.QSSSSRDDNMFQIGK.M
*	2016-11-16-hjk-Sharma-Shalini-SL3-mut.20233.20233.2	2.5667	0.5022	100	1067.48	1067.48	0.6	4.18513e+06	1	9.61874	4.46	68.8	1	R.DDNMFQIGK.M
*	2016-11-16-hjk-Sharma-Shalini-SL3-mut.22462.22462.2	2.1402	0.595	100	1414.56	1414.57	-0.3	6908801	1	8.12028	3.96	70.6	1	R.EYWMDPEGEMK.P
*	2016-11-16-hjk-Sharma-Shalini-SL3-mut.20166.20166.2	3.8467	0.5806	100	1724.74	1724.74	0.4	2.71395e+06	1	14.2458	4.4	57.7	1	R.EYWMDPEGEMKPGR.K
*	2016-11-16-hjk-Sharma-Shalini-SL3-mut.20105.20105.3	3.2683	0.5136	100	1724.74	1724.74	-0.4	3.2202e+06	1	8.75698	4.4	38.6	2	R.EYWMDPEGEMKPGR.K
*	2016-11-16-hjk-Sharma-Shalini-SL3-mut.26391.26391.2	3.8916	0.5984	100	1499.79	1499.79	1.1	14530051	1	12.3637	6.56	65.2	2	K.GISLNPEQWSQLK.E
*	2016-11-16-hjk-Sharma-Shalini-SL3-mut.16514.16514.2	2.7033	0.4214	100	1260.61	1260.61	-0.7	30962092	1	9.2887	3.96	63.2	1	K.EQISDIDDAVR.K
P61978	26	60	0.484	463	50976	5.5	U	0.0141417	2.0479	Heterogeneous nuclear ribonucleoprotein K OS=Homo sapiens GN=HNRNPK PE=1 SV=1	0	60	0
*	2016-11-16-hjk-Sharma-Shalini-SL3-mut.12106.12106.2	4.4255	0.6298	100	1579.71	1579.71	0.1	42430956	1	10.9695	4.25	66.7	2	K.RPAEDMEEEQAFK.R
*	2016-11-16-hjk-Sharma-Shalini-SL3-mut.12118.12118.3	3.4116	0.566	100	1579.71	1579.71	1.7	19784834	1	11.5639	4.25	37	2	K.RPAEDMEEEQAFK.R
*	2016-11-16-hjk-Sharma-Shalini-SL3-mut.14767.14767.2	3.6935	0.7502	100	1423.61	1423.6	2.8	951135	1	16.5718	3.86	76.2	1	R.PAEDMEEEQAFK.R
*	2016-11-16-hjk-Sharma-Shalini-SL3-mut.12580.12580.2	3.8661	0.3868	100	1349.65	1349.65	-1.6	10584474	1	8.7372	4.72	88.2	1	R.SRNTDEMVELR.I
*	2016-11-16-hjk-Sharma-Shalini-SL3-mut.15475.15475.2	2.7245	0.5026	100	1106.51	1106.51	-1.3	7.96615e+06	1	10.8774	4.14	68.8	2	R.NTDEMVELR.I
*	2016-11-16-hjk-Sharma-Shalini-SL3-mut.15194.15194.2	1.9843	0.3599	99.6	2121.02	2121.02	0.1	1.87384e+06	1	7.217	4.72	21.4	1	K.ALRTDYNASVSVPDSSGPER.I
*	2016-11-16-hjk-Sharma-Shalini-SL3-mut.15142.15142.3	4.1882	0.5726	99.9	2121.01	2121.02	-4.4	5674935	1	9.428	4.72	44.8	1	K.ALRTDYNASVSVPDSSGPER.I
*	2016-11-16-hjk-Sharma-Shalini-SL3-mut.14645.14645.2	4.547	0.6846	100	1780.8	1780.8	1.4	3.0371e+06	1	17.0558	4.14	75	4	R.TDYNASVSVPDSSGPER.I
*	2016-11-16-hjk-Sharma-Shalini-SL3-mut.29301.29301.4	7.8923	0.6477	100	4183.14	4183.13	3.5	8870599	1	13.0865	4.58	20.6	3	K.KIIPTLEEGLQLPSPTATSQLPLESDAVECLNYQHYK.G
*	2016-11-16-hjk-Sharma-Shalini-SL3-mut.14501.14501.2	2.3862	0.5471	100	1098.45	1098.45	1.9	3.5662e+06	1	9.44949	4.14	64.3	1	K.GSDFDCELR.L
*	2016-11-16-hjk-Sharma-Shalini-SL3-mut.22481.22481.2	5.964	0.7582	100	1518.93	1518.94	-1.4	5.00246e+06	1	15.7773	9.08	96.2	1	R.LLIHQSLAGGIIGVK.G
*	2016-11-16-hjk-Sharma-Shalini-SL3-mut.22473.22473.3	3.7575	0.6406	100	1518.94	1518.94	0.9	9569220	1	10.7897	9.08	38.5	3	R.LLIHQSLAGGIIGVK.G
*	2016-11-16-hjk-Sharma-Shalini-SL3-mut.6934.6934.2	2.8986	0.2415	100	1332.71	1332.71	1.6	2147570	1	5.82263	6.56	52.6	2	K.ELRENTQTTIK.L
*	2016-11-16-hjk-Sharma-Shalini-SL3-mut.9444.9444.2	3.8966	0.6476	100	1549.65	1549.65	1.5	3912369	1	10.3408	5.63	76.2	2	K.LFQECCPHSTDR.V
*	2016-11-16-hjk-Sharma-Shalini-SL3-mut.9433.9433.3	2.7923	0.6215	100	1549.66	1549.65	2.5	6.09309e+06	1	8.79471	5.63	42.1	2	K.LFQECCPHSTDR.V
*	2016-11-16-hjk-Sharma-Shalini-SL3-mut.15400.15400.4	3.3683	0.3308	99	2585.27	2584.28	-1.8	8.20028e+06	1	5.70325	7.16	21.1	1	K.LFQECCPHSTDRVVLIGGKPDR.V
*	2016-11-16-hjk-Sharma-Shalini-SL3-mut.15486.15486.5	3.2051	0.348	99.2	2584.27	2584.28	-1.1	9425708	1	8.54068	7.16	16.9	1	K.LFQECCPHSTDRVVLIGGKPDR.V
*	2016-11-16-hjk-Sharma-Shalini-SL3-mut.29394.29394.2	3.7842	0.5749	100	1340.81	1340.8	1.8	1.69349e+06	1	10.4237	4.46	63.6	4	K.IILDLISESPIK.G
*	2016-11-16-hjk-Sharma-Shalini-SL3-mut.18926.18926.2	2.1556	0.5398	99.9	1194.7	1194.7	2.4	9111484	1	12.3858	10.06	55	16	R.NLPLPPPPPPR.G
*	2016-11-16-hjk-Sharma-Shalini-SL3-mut.14257.14257.2	2.427	0.5134	100	997.439	997.441	-1.9	2.87611e+06	1	9.66227	4.46	73.3	1	R.GGDLMAYDR.R
*	2016-11-16-hjk-Sharma-Shalini-SL3-mut.11780.11780.2	1.721	0.3855	99.4	1153.54	1153.54	-0.6	149973824	1	7.21771	6.56	60	1	R.GGDLMAYDRR.G
*	2016-11-16-hjk-Sharma-Shalini-SL3-mut.25650.25650.2	4.8725	0.5705	100	1917.03	1917.03	1.1	2.19861e+06	1	13.2308	6.56	69	2	R.GSYGDLGGPIITTQVTIPK.D
*	2016-11-16-hjk-Sharma-Shalini-SL3-mut.12460.12460.2	3.1137	0.5135	100	1259.58	1259.58	0.6	40781960	1	11.6389	3.86	55	2	K.IDEPLEGSEDR.I
*	2016-11-16-hjk-Sharma-Shalini-SL3-mut.29309.29309.3	4.5051	0.5556	100	3831.94	3829.95	-2.8	828388	1	9.22086	4.12	14.8	1	K.IDEPLEGSEDRIITITGTQDQIQNAQYLLQNSVK.Q
*	2016-11-16-hjk-Sharma-Shalini-SL3-mut.29862.29862.2	7.6044	0.5763	100	2589.38	2589.39	-2	6.78346e+06	1	16.2145	6.56	63.9	2	R.IITITGTQDQIQNAQYLLQNSVK.Q
*	2016-11-16-hjk-Sharma-Shalini-SL3-mut.29883.29883.3	3.6697	0.4689	99.8	2589.39	2589.39	1.4	5345932	1	7.79226	6.56	22.7	1	R.IITITGTQDQIQNAQYLLQNSVK.Q
P04792	11	13	0.478	205	22783	6.4	U	0.00692021	2.00608	Heat shock protein beta-1 OS=Homo sapiens GN=HSPB1 PE=1 SV=2	0	13	0
*	2016-11-16-hjk-Sharma-Shalini-SL3-mut.19953.19953.2	2.5544	0.2402	99.9	987.609	987.61	-0.9	7.12869e+06	1	7.1595	12	92.9	1	R.RVPFSLLR.G
*	2016-11-16-hjk-Sharma-Shalini-SL3-mut.25780.25780.3	3.264	0.6148	100	1902.87	1902.87	-1.1	2.49538e+06	1	13.3116	7.33	50	1	R.GPSWDPFRDWYPHSR.L
*	2016-11-16-hjk-Sharma-Shalini-SL3-mut.25437.25437.2	2.6883	0.497	99.9	1163.63	1163.62	4.3	4.97967e+06	1	9.81866	6.56	72.2	1	R.LFDQAFGLPR.L
*	2016-11-16-hjk-Sharma-Shalini-SL3-mut.23583.23583.2	4.677	0.6222	100	1783.92	1783.92	1.4	1.64274e+06	1	13.0796	4.72	80.8	1	R.VSLDVNHFAPDELTVK.T
*	2016-11-16-hjk-Sharma-Shalini-SL3-mut.23565.23565.3	3.3968	0.5074	100	1783.92	1783.92	1.2	2807040	1	9.14727	4.72	36.5	2	R.VSLDVNHFAPDELTVK.T
*	2016-11-16-hjk-Sharma-Shalini-SL3-mut.12796.12796.2	2.2442	0.5493	100	917.494	917.494	0.5	2768928	1	9.66337	4.46	56.2	1	K.DGVVEITGK.H
*	2016-11-16-hjk-Sharma-Shalini-SL3-mut.8079.8079.3	2.7921	0.5639	99.8	1468.74	1468.74	-2.4	3144831	1	9.65123	4.89	45	1	K.DGVVEITGKHEER.Q
*	2016-11-16-hjk-Sharma-Shalini-SL3-mut.4751.4751.3	3.2488	0.5074	100	1655.75	1655.75	0.4	1.55709e+06	1	10.9138	5.63	58.3	1	K.HEERQDEHGYISR.C
*	2016-11-16-hjk-Sharma-Shalini-SL3-mut.4748.4748.4	3.548	0.5968	100	1655.75	1655.75	0.1	5.91105e+06	1	11.8066	5.63	32.1	1	K.HEERQDEHGYISR.C
*	2016-11-16-hjk-Sharma-Shalini-SL3-mut.25002.25002.2	4.8442	0.6068	100	1905.99	1905.99	0.1	4.18875e+06	1	12.8964	4.46	84.6	2	K.LATQSNEITIPVTFESR.A
*	2016-11-16-hjk-Sharma-Shalini-SL3-mut.6467.6467.2	1.6909	0.4271	99.4	941.505	941.505	0.5	7.63538e+06	1	7.48032	6.56	56.2	1	R.AQLGGPEAAK.S
Q06830	9	9	0.477	199	22110	8.1	U	0.00493537	1.99916	Peroxiredoxin-1 OS=Homo sapiens GN=PRDX1 PE=1 SV=1	0	9	0
*	2016-11-16-hjk-Sharma-Shalini-SL3-mut.15110.15110.2	2.5099	0.6264	100	1164.57	1164.57	2.4	5.72415e+06	1	13.4365	6.56	70.6	1	K.ATAVMPDGQFK.D
*	2016-11-16-hjk-Sharma-Shalini-SL3-mut.17182.17182.2	1.6667	0.2884	99.3	940.462	940.462	0.1	4.9453e+06	1	7.42284	4.46	66.7	1	K.DISLSDYK.G
*	2016-11-16-hjk-Sharma-Shalini-SL3-mut.26059.26059.2	3.4037	0.5008	100	1622.86	1622.86	-0.8	3177930	1	8.35381	6.56	53.8	1	K.QGGLGPMNIPLVSDPK.R
*	2016-11-16-hjk-Sharma-Shalini-SL3-mut.15829.15829.2	3.6579	0.1787	100	1263.7	1263.71	-1.4	6.3679e+06	1	6.10579	8.8	85	1	K.RTIAQDYGVLK.A
*	2016-11-16-hjk-Sharma-Shalini-SL3-mut.17971.17971.2	2.129	0.4929	100	1107.6	1107.6	-0.3	2.73224e+06	1	9.49667	6.56	68.8	1	R.TIAQDYGVLK.A
*	2016-11-16-hjk-Sharma-Shalini-SL3-mut.14008.14008.2	2.2787	0.533	100	894.431	894.432	-1.1	3865461	1	7.92589	4.46	76.9	1	K.ADEGISFR.G
	2016-11-16-hjk-Sharma-Shalini-SL3-mut.23633.23633.2	1.777	0.425	99.5	920.51	920.509	1.3	3.20257e+06	1	9.43547	4.46	61.5	1	R.GLFIIDDK.G
	2016-11-16-hjk-Sharma-Shalini-SL3-mut.19535.19535.2	2.6363	0.4236	100	1211.68	1211.67	2.2	9553164	1	11.0745	6.56	57.9	1	R.QITVNDLPVGR.S
*	2016-11-16-hjk-Sharma-Shalini-SL3-mut.13386.13386.4	3.2499	0.2994	99.3	2407.19	2406.19	-0.4	2892050	1	6.4523	7.11	24.8	1	K.HGEVCPAGWKPGSDTIKPDVQK.S
Q15369	4	4	0.473	112	12473	4.8	U	0.00389737	1.97167	Transcription elongation factor B polypeptide 1 OS=Homo sapiens GN=TCEB1 PE=1 SV=1	0	4	0
*	2016-11-16-hjk-Sharma-Shalini-SL3-mut.15726.15726.2	3.5319	0.7256	100	1548.65	1547.65	-1.5	2572612	1	13.6333	4.46	66.7	1	K.TYGGCEGPDAMYVK.L
*	2016-11-16-hjk-Sharma-Shalini-SL3-mut.5468.5468.3	2.4608	0.5086	100	1212.67	1212.67	-0.4	3276212	1	8.61857	9.08	47.2	1	K.REHALTSGTIK.A
*	2016-11-16-hjk-Sharma-Shalini-SL3-mut.24280.24280.2	5.4692	0.7526	100	2211.01	2211.01	-0.9	1.85364e+06	1	19.4055	4.14	56.2	1	K.AMLSGPGQFAENETNEVNFR.E
*	2016-11-16-hjk-Sharma-Shalini-SL3-mut.20646.20646.2	2.1235	0.6034	99.9	1111.49	1111.5	-2.1	2.32455e+06	1	12.13	8.22	61.5	1	K.VCMYFTYK.V
P09651	21	30	0.47	372	38747	9.1	U	0.00880052	1.95121	Heterogeneous nuclear ribonucleoprotein A1 OS=Homo sapiens GN=HNRNPA1 PE=1 SV=5	0	30	0
	2016-11-16-hjk-Sharma-Shalini-SL3-mut.5678.5678.2	2.3399	0.3472	100	1427.75	1427.75	-0.6	2.51278e+06	1	8.27277	6.56	57.9	1	K.SESPKEPEQLRK.L
	2016-11-16-hjk-Sharma-Shalini-SL3-mut.5741.5741.3	2.4821	0.4996	100	1427.75	1427.75	-0.3	4638210	1	7.69381	6.56	32.4	1	K.SESPKEPEQLRK.L
	2016-11-16-hjk-Sharma-Shalini-SL3-mut.29418.29418.2	4.8754	0.6346	100	1784.91	1784.91	0.8	20792068	1	13.3893	4.14	67.9	3	K.LFIGGLSFETTDESLR.S
	2016-11-16-hjk-Sharma-Shalini-SL3-mut.24219.24219.2	5.5858	0.7018	100	1965.9	1965.89	0.5	3.07694e+06	1	18.5419	5.63	81.5	1	R.SHFEQWGTLTDCVVMR.D
	2016-11-16-hjk-Sharma-Shalini-SL3-mut.22251.22251.3	6.4675	0.6857	100	2521.16	2521.16	0.1	13473669	1	18.0435	5.8	44.8	3	R.SHFEQWGTLTDCVVMRDPNTK.R
	2016-11-16-hjk-Sharma-Shalini-SL3-mut.22256.22256.4	2.8936	0.4307	99	2521.15	2521.16	-2.3	4180920	1	6.97291	5.8	20.7	1	R.SHFEQWGTLTDCVVMRDPNTK.R
	2016-11-16-hjk-Sharma-Shalini-SL3-mut.29588.29588.3	6.34	0.6721	100	2510.22	2510.21	2.8	6.31577e+06	1	15.705	5.8	43.5	2	R.GFGFVTYATVEEVDAAMNARPHK.V
	2016-11-16-hjk-Sharma-Shalini-SL3-mut.29587.29587.4	3.5558	0.6551	99.8	2510.22	2510.21	4	1.38238e+06	1	10.5161	5.8	21.1	1	R.GFGFVTYATVEEVDAAMNARPHK.V
	2016-11-16-hjk-Sharma-Shalini-SL3-mut.6314.6314.2	3.7289	0.4938	100	1437.75	1437.74	1.4	8633959	1	8.42791	7.33	47.8	1	R.EDSQRPGAHLTVK.K
	2016-11-16-hjk-Sharma-Shalini-SL3-mut.6304.6304.3	2.9696	0.4136	99.8	1437.74	1437.74	0.3	28506978	1	6.53227	7.33	50	1	R.EDSQRPGAHLTVK.K
	2016-11-16-hjk-Sharma-Shalini-SL3-mut.4890.4890.3	3.7366	0.4675	100	1565.84	1565.84	1.8	4679626	1	7.35589	8.8	50	1	R.EDSQRPGAHLTVKK.I
	2016-11-16-hjk-Sharma-Shalini-SL3-mut.19218.19218.3	5.5777	0.678	100	2195.96	2195.96	-0.8	7.07569e+06	1	11.8838	4.7	60.9	1	K.EDTEEHHLRDYFEQYGK.I
	2016-11-16-hjk-Sharma-Shalini-SL3-mut.25478.25478.2	2.9653	0.552	100	1218.64	1218.64	1.6	44647260	1	10.9269	4.14	72.2	1	K.IEVIEIMTDR.G
	2016-11-16-hjk-Sharma-Shalini-SL3-mut.18096.18096.4	2.857	0.4206	99.9	1983.96	1983.96	0.6	2588591	1	7.16866	5.74	28.9	1	K.KRGFAFVTFDDHDSVDK.I
	2016-11-16-hjk-Sharma-Shalini-SL3-mut.21150.21150.3	5.4103	0.6311	100	1855.86	1855.86	0.5	15425877	1	13.8261	4.89	64.6	3	K.RGFAFVTFDDHDSVDK.I
	2016-11-16-hjk-Sharma-Shalini-SL3-mut.24074.24074.2	4.1583	0.6824	100	1699.76	1699.76	2.1	2.8785e+06	1	14.2227	4.4	66.7	3	R.GFAFVTFDDHDSVDK.I
	2016-11-16-hjk-Sharma-Shalini-SL3-mut.4721.4721.2	3.1823	0.677	100	1485.67	1485.67	0.2	1.42226e+06	1	13.3804	7.38	71.4	1	K.YHTVNGHNCEVR.K
	2016-11-16-hjk-Sharma-Shalini-SL3-mut.4708.4708.3	3.4962	0.6214	100	1485.67	1485.67	0.7	18311252	1	11.5576	7.38	52.6	1	K.YHTVNGHNCEVR.K
	2016-11-16-hjk-Sharma-Shalini-SL3-mut.3364.3364.3	2.5123	0.5493	99.9	1613.76	1613.76	1.9	3785483	1	9.98955	8.23	42.5	1	K.YHTVNGHNCEVRK.A
	2016-11-16-hjk-Sharma-Shalini-SL3-mut.14951.14951.2	2.8767	0.5468	100	1375.63	1375.63	2.4	10370918	1	11.3908	8.64	56.5	1	R.SSGPYGGGGQYFAK.P
*	2016-11-16-hjk-Sharma-Shalini-SL3-mut.6857.6857.2	5.1477	0.7555	100	1694.7	1694.7	0.3	3.12938e+06	1	17.5564	8.8	71	1	R.NQGGYGGSSSSSSYGSGR.R
P84103	10	21	0.463	164	19330	11.6	U	0.0139735	1.90402	Splicing factor, arginine/serine-rich 3 OS=Homo sapiens GN=SFRS3 PE=1 SV=1	0	21	0
*	2016-11-16-hjk-Sharma-Shalini-SL3-mut.7670.7670.2	1.5265	0.4517	99.4	994.397	994.397	-0.2	11568285	1	5.61213	4.46	57.1	1	R.DSCPLDCK.V
*	2016-11-16-hjk-Sharma-Shalini-SL3-mut.11495.11495.2	2.6001	0.4098	100	1248.63	1248.63	0.2	48531720	1	11.9043	8.8	66.7	1	K.VYVGNLGNNGNK.T
*	2016-11-16-hjk-Sharma-Shalini-SL3-mut.13962.13962.3	4.24	0.3745	99.9	1876.95	1876.95	-1.9	7.28208e+06	1	9.50568	6.56	37.3	1	K.VYVGNLGNNGNKTELER.A
*	2016-11-16-hjk-Sharma-Shalini-SL3-mut.20747.20747.2	1.8728	0.5483	99.9	1043.53	1043.53	1.4	4.07817e+06	1	11.6748	8.8	60	2	R.AFGYYGPLR.S
	2016-11-16-hjk-Sharma-Shalini-SL3-mut.27954.27954.2	4.0273	0.7555	100	1621.77	1621.76	2.1	3.79767e+06	1	18.3476	4.14	75	2	R.NPPGFAFVEFEDPR.D
*	2016-11-16-hjk-Sharma-Shalini-SL3-mut.27553.27553.2	4.0894	0.5957	100	2320.1	2320.1	-0.4	24383250	1	13.0126	4.25	62.9	2	R.NPPGFAFVEFEDPRDAADAVR.E
*	2016-11-16-hjk-Sharma-Shalini-SL3-mut.27500.27500.3	3.8123	0.6256	100	2320.1	2320.1	1.1	102066080	1	14.5481	4.25	32.4	2	R.NPPGFAFVEFEDPRDAADAVR.E
*	2016-11-16-hjk-Sharma-Shalini-SL3-mut.7455.7455.2	3.0699	0.4057	100	1130.62	1130.62	-0.8	4662360	1	7.01634	6.56	81.2	1	R.VRVELSNGEK.R
*	2016-11-16-hjk-Sharma-Shalini-SL3-mut.6345.6345.3	2.2345	0.3763	99.2	1286.72	1286.72	0.5	4133776	1	7.26491	9.08	45.2	1	R.VRVELSNGEKR.S
*	2016-11-16-hjk-Sharma-Shalini-SL3-mut.7319.7319.2	3.6618	0.5358	100	1123.57	1123.58	-1.4	8582726	1	10.2988	12	88.2	8	R.NRGPPPSWGR.R
P16989	14	26	0.46	372	40090	9.8	U	0.00762712	1.88403	DNA-binding protein A OS=Homo sapiens GN=CSDA PE=1 SV=4	0	26	0
*	2016-11-16-hjk-Sharma-Shalini-SL3-mut.21375.21375.3	7.123	0.7113	100	4380.13	4379.11	2.9	889363	1	17.8032	4.4	12.3	2	K.SPVGSGAPQAAAPAPAAHVAGNPGGDAAPAATGTAAAASLATAAGSEDAEK.K
*	2016-11-16-hjk-Sharma-Shalini-SL3-mut.20265.20265.4	8.1175	0.6887	100	4507.21	4507.21	0.3	6532876	1	14.4977	4.89	18.8	1	K.SPVGSGAPQAAAPAPAAHVAGNPGGDAAPAATGTAAAASLATAAGSEDAEKK.V
	2016-11-16-hjk-Sharma-Shalini-SL3-mut.15474.15474.2	2.4847	0.6119	100	940.463	940.464	-0.5	10402409	1	12.2897	9.08	78.6	1	R.NGYGFINR.N
	2016-11-16-hjk-Sharma-Shalini-SL3-mut.12007.12007.2	2.9914	0.4218	100	1398.67	1398.68	-0.9	4.13017e+06	1	7.10872	8.8	61.9	2	R.NGYGFINRNDTK.E
	2016-11-16-hjk-Sharma-Shalini-SL3-mut.13663.13663.2	4.5114	0.6201	100	1286.67	1286.67	0.2	4488701	1	10.6537	5.63	94.7	2	K.EDVFVHQTAIK.K
	2016-11-16-hjk-Sharma-Shalini-SL3-mut.10306.10306.2	5.072	0.5197	100	1414.77	1414.77	0.3	5.23693e+06	1	10.4886	7.33	95.5	1	K.EDVFVHQTAIKK.N
	2016-11-16-hjk-Sharma-Shalini-SL3-mut.10317.10317.3	2.1626	0.4063	99	1414.77	1414.77	0.9	15792729	1	6.85131	7.33	37.1	1	K.EDVFVHQTAIKK.N
	2016-11-16-hjk-Sharma-Shalini-SL3-mut.22031.22031.2	5.7202	0.6956	100	1796.82	1795.82	-2.4	6.96243e+06	1	15.3053	3.8	72.4	6	R.SVGDGETVEFDVVEGEK.G
*	2016-11-16-hjk-Sharma-Shalini-SL3-mut.14334.14334.2	5.3249	0.6173	100	1782.86	1782.86	1.6	1.50814e+06	1	15.5489	4.14	69	2	K.GAEAANVTGPDGVPVEGSR.Y
*	2016-11-16-hjk-Sharma-Shalini-SL3-mut.13793.13793.2	2.2197	0.4068	100	1075.54	1075.55	-0.7	8486941	1	7.93985	4.46	61.1	1	R.IQAGEIGEMK.D
*	2016-11-16-hjk-Sharma-Shalini-SL3-mut.13131.13131.2	3.4024	0.5128	100	1559.79	1559.79	-4.5	5685597	1	12.6397	5.63	72	2	K.DGVPEGAQLQGPVHR.N
*	2016-11-16-hjk-Sharma-Shalini-SL3-mut.13156.13156.3	3.8309	0.5047	100	1559.79	1559.79	-1.3	6.04534e+06	1	9.73412	5.63	39.6	1	K.DGVPEGAQLQGPVHR.N
*	2016-11-16-hjk-Sharma-Shalini-SL3-mut.6372.6372.2	4.4156	0.6705	100	1612.77	1612.77	0.6	4356853	1	14.0627	6.56	76	2	K.ENQQATSGPNQPSVR.R
*	2016-11-16-hjk-Sharma-Shalini-SL3-mut.10905.10905.2	2.9166	0.6037	99.9	1881.85	1881.85	3.5	1007622	1	12.0941	3.47	69.2	2	K.AGEAPTENPAPPTQQSSAE.-
P35244	4	4	0.455	121	13569	5.1	U	0.00360748	1.85102	Replication protein A 14 kDa subunit OS=Homo sapiens GN=RPA3 PE=1 SV=1	0	4	0
*	2016-11-16-hjk-Sharma-Shalini-SL3-mut.20604.20604.2	2.789	0.5145	100	1096.54	1096.53	0.7	8157980	1	10.303	4.46	66.7	1	K.MFILSDGEGK.N
*	2016-11-16-hjk-Sharma-Shalini-SL3-mut.23492.23492.2	3.2352	0.5906	100	1430.74	1430.73	2.6	4.67196e+06	1	11.6172	8.26	70	1	K.ATILCTSYVQFK.E
*	2016-11-16-hjk-Sharma-Shalini-SL3-mut.23496.23496.2	5.5667	0.7016	100	1833.86	1833.87	-1.3	2.4409e+06	1	17.1298	4.4	75	1	K.EDSHPFDLGLYNEAVK.I
*	2016-11-16-hjk-Sharma-Shalini-SL3-mut.28886.28886.3	2.763	0.4581	99.8	2040.04	2039.04	-0.1	2.14555e+06	1	8.80514	5.44	31.2	1	K.IIHDFPQFYPLGIVQHD.-
P62312	4	4	0.45	80	9128	9.6	U	0.00545632	1.81838	U6 snRNA-associated Sm-like protein LSm6 OS=Homo sapiens GN=LSM6 PE=1 SV=1	0	4	0
*	2016-11-16-hjk-Sharma-Shalini-SL3-mut.12150.12150.2	2.6015	0.4226	100	1108.72	1108.72	0.2	4306340	1	5.84588	10.99	72.2	1	K.QIIGRPVVVK.L
*	2016-11-16-hjk-Sharma-Shalini-SL3-mut.8818.8818.2	1.5847	0.336	99.2	923.458	923.458	-0.1	2.43201e+06	1	6.79521	6.56	50	1	K.LNSGVDYR.G
*	2016-11-16-hjk-Sharma-Shalini-SL3-mut.15447.15447.2	2.1253	0.3859	99.9	841.42	841.42	-0.8	23321552	1	9.69605	6.56	66.7	1	K.YGDAFIR.G
*	2016-11-16-hjk-Sharma-Shalini-SL3-mut.16112.16112.2	3.2701	0.6325	100	1236.66	1236.66	-0.7	11774947	1	14.5823	8.8	82.4	1	R.GNNVLYISTQK.R
P31939	21	26	0.449	592	64616	6.7	U	0.00479271	1.8119	Bifunctional purine biosynthesis protein PURH OS=Homo sapiens GN=ATIC PE=1 SV=3	0	26	0
*	2016-11-16-hjk-Sharma-Shalini-SL3-mut.17881.17881.2	2.4339	0.5355	100	892.489	892.489	-0.1	4.28058e+06	1	9.71404	6.56	78.6	1	K.TGLVEFAR.N
*	2016-11-16-hjk-Sharma-Shalini-SL3-mut.26931.26931.2	4.4611	0.7018	100	1599.91	1599.91	1.1	4.21499e+06	1	14.0757	9.08	72.4	1	R.NLTALGLNLVASGGTAK.A
*	2016-11-16-hjk-Sharma-Shalini-SL3-mut.29434.29434.2	4.6133	0.5248	100	1607.77	1607.77	-0.5	3589054	1	12.9671	4.14	80.8	1	R.DVSELTGFPEMLGGR.V
*	2016-11-16-hjk-Sharma-Shalini-SL3-mut.12270.12270.3	3.312	0.7075	100	1355.79	1355.79	0.8	2.62469e+06	1	13.0458	10.06	54.8	1	K.TLHPAVHAGILAR.N
*	2016-11-16-hjk-Sharma-Shalini-SL3-mut.10706.10706.2	1.7856	0.428	99.5	1245.55	1245.55	-0.5	2.80359e+06	1	8.73579	4.14	50	1	R.NIPEDNADMAR.L
*	2016-11-16-hjk-Sharma-Shalini-SL3-mut.23556.23556.2	1.9435	0.2642	99.3	1309.7	1309.7	0.7	4.76953e+06	1	7.28018	8.26	61.1	2	R.VVACNLYPFVK.T
*	2016-11-16-hjk-Sharma-Shalini-SL3-mut.25326.25326.2	5.3601	0.7492	100	2603.19	2602.19	-2	1.67666e+06	1	19.2121	3.86	62.5	2	R.VTVVCEPEDYVVVSTEMQSSESK.D
*	2016-11-16-hjk-Sharma-Shalini-SL3-mut.24324.24324.3	3.0058	0.61	100	2034.92	2034.92	0.9	7782081	1	11.2132	4.72	34.4	1	K.AFTHTAQYDEAISDYFR.K
*	2016-11-16-hjk-Sharma-Shalini-SL3-mut.21885.21885.3	5.223	0.6572	100	2163.01	2163.01	-1.2	4657883	1	13.6892	5.8	48.1	1	K.AFTHTAQYDEAISDYFRK.Q
*	2016-11-16-hjk-Sharma-Shalini-SL3-mut.21865.21865.4	2.677	0.5078	99.7	2163.02	2163.01	1.7	898486	1	8.98557	5.8	21.7	1	K.AFTHTAQYDEAISDYFRK.Q
*	2016-11-16-hjk-Sharma-Shalini-SL3-mut.19470.19470.3	3.7342	0.4171	99.9	2087.04	2087.04	2.1	5.67853e+06	1	11.5316	8.64	31.8	1	R.YGMNPHQTPAQLYTLQPK.L
*	2016-11-16-hjk-Sharma-Shalini-SL3-mut.22114.22114.2	2.4944	0.3734	99.4	1174.65	1174.65	3.4	2.73533e+06	1	8.28079	6.56	66.7	2	K.EALGIPAAASFK.H
*	2016-11-16-hjk-Sharma-Shalini-SL3-mut.17429.17429.2	5.4119	0.6874	100	1847.95	1847.95	1.1	2512556	1	19.3373	4.72	69.7	1	K.HVSPAGAAVGIPLSEDEAK.V
*	2016-11-16-hjk-Sharma-Shalini-SL3-mut.17502.17502.3	4.4656	0.5023	100	1847.95	1847.95	1.1	6.2379e+06	1	13.4493	4.72	43.9	1	K.HVSPAGAAVGIPLSEDEAK.V
*	2016-11-16-hjk-Sharma-Shalini-SL3-mut.21943.21943.2	2.7482	0.4353	100	1190.56	1190.56	3.4	4304683	1	10.475	6.56	66.7	2	K.VCMVYDLYK.T
*	2016-11-16-hjk-Sharma-Shalini-SL3-mut.17723.17723.2	2.309	0.4944	99.9	1163.64	1163.64	1.2	12693852	1	11.8512	9.08	61.1	1	K.TLTPISAAYAR.A
*	2016-11-16-hjk-Sharma-Shalini-SL3-mut.29490.29490.2	5.9729	0.7731	100	2145.99	2145.98	2.2	1.95952e+06	1	21.7034	4.14	71	1	R.MSSFGDFVALSDVCDVPTAK.I
*	2016-11-16-hjk-Sharma-Shalini-SL3-mut.19585.19585.3	6.1942	0.6482	100	2559.12	2559.12	-0.1	3.16111e+06	1	14.7004	4.4	38.1	2	K.NGNYCVLQMDQSYKPDENEVR.T
*	2016-11-16-hjk-Sharma-Shalini-SL3-mut.20255.20255.2	1.8845	0.3886	99.8	994.557	994.557	0.4	3.31286e+06	1	7.65169	9.08	69.2	1	K.SLFSNVVTK.N
*	2016-11-16-hjk-Sharma-Shalini-SL3-mut.12493.12493.2	3.4467	0.5919	100	1384.73	1384.73	0.3	2.99058e+06	1	13.5537	10.06	69.6	1	K.NGQVIGIGAGQQSR.I
*	2016-11-16-hjk-Sharma-Shalini-SL3-mut.11706.11706.3	3.2143	0.5026	100	1620.84	1620.83	1.1	2730128	1	10.5521	8.8	38.8	1	K.RSGVAYIAAPSGSAADK.V
Q92945	29	47	0.448	710	73147	7.3	U	0.00722386	1.80543	Far upstream element-binding protein 2 OS=Homo sapiens GN=KHSRP PE=1 SV=3	0	47	0
*	2016-11-16-hjk-Sharma-Shalini-SL3-mut.14024.14024.2	2.0035	0.3296	99.5	992.478	992.48	-1.5	7.08846e+06	1	8.04769	4.46	68.8	2	K.DAFADAVQR.A
*	2016-11-16-hjk-Sharma-Shalini-SL3-mut.21359.21359.2	6.628	0.7212	100	2154.01	2154.01	0.5	10634437	1	20.7535	4.46	79.4	2	K.IGGDAATTVNNSTPDFGFGGQK.R
*	2016-11-16-hjk-Sharma-Shalini-SL3-mut.4735.4735.2	2.9589	0.375	100	1401.66	1401.66	1.3	2.57981e+06	1	8.9684	4.4	72.7	1	K.RQLEDGDQPESK.K
*	2016-11-16-hjk-Sharma-Shalini-SL3-mut.3436.3436.3	2.9936	0.5055	100	1529.76	1529.76	1.3	3372750	1	9.66065	4.89	44.7	1	K.RQLEDGDQPESKK.L
*	2016-11-16-hjk-Sharma-Shalini-SL3-mut.16353.16353.3	5.9538	0.7239	100	2185.17	2185.17	-1.1	1.92426e+06	1	14.1195	9.08	47.1	1	K.KLASQGDSISSQLGPIHPPPR.T
*	2016-11-16-hjk-Sharma-Shalini-SL3-mut.16409.16409.4	5.1133	0.5169	100	2185.17	2185.17	-0.1	3.35627e+06	1	9.40122	9.08	32	2	K.KLASQGDSISSQLGPIHPPPR.T
*	2016-11-16-hjk-Sharma-Shalini-SL3-mut.18420.18420.3	4.4095	0.5982	100	2057.08	2057.08	0.7	11497106	1	11.8581	7.33	40	2	K.LASQGDSISSQLGPIHPPPR.T
*	2016-11-16-hjk-Sharma-Shalini-SL3-mut.28911.28911.3	5.1851	0.725	100	2224.11	2224.11	0.8	8438871	1	18.4666	4.72	39.4	1	R.TSMTEEYRVPDGMVGLIIGR.G
*	2016-11-16-hjk-Sharma-Shalini-SL3-mut.27767.27767.2	2.6361	0.6407	100	1226.69	1226.69	1.6	1.85598e+06	1	12.6139	6.56	76.2	1	R.VPDGMVGLIIGR.G
*	2016-11-16-hjk-Sharma-Shalini-SL3-mut.15237.15237.2	3.1893	0.5082	100	1354.7	1354.7	0.1	37643472	1	11.726	4.46	59.1	2	K.VQISPDSGGLPER.S
*	2016-11-16-hjk-Sharma-Shalini-SL3-mut.13414.13414.2	3.104	0.576	100	1302.69	1302.69	1.8	2.83615e+06	1	9.88569	6.56	71.4	2	R.SVSLTGAPESVQK.A
*	2016-11-16-hjk-Sharma-Shalini-SL3-mut.22685.22685.2	2.3896	0.4346	100	1079.52	1079.52	-0.8	11148998	1	8.73454	4.46	62.5	1	K.MMLDDIVSR.G
*	2016-11-16-hjk-Sharma-Shalini-SL3-mut.20148.20148.3	5.4325	0.6151	100	2792.32	2791.32	-3	2.37127e+06	1	11.9477	5.63	28.2	1	R.GGPPGQFHDNANGGQNGTVQEIMIPAGK.A
*	2016-11-16-hjk-Sharma-Shalini-SL3-mut.17535.17535.2	4.4892	0.5217	100	1675.84	1675.83	3.4	2.78137e+06	1	9.29127	4.46	69.2	2	K.MILIQDGSQNTNVDK.P
*	2016-11-16-hjk-Sharma-Shalini-SL3-mut.29297.29297.2	4.3574	0.6416	100	1592.76	1592.76	-1.9	3921276	1	13.3603	4.46	68.2	1	K.VQQACEMVMDILR.E
*	2016-11-16-hjk-Sharma-Shalini-SL3-mut.9161.9161.3	2.3991	0.5608	99.8	1557.67	1557.67	1.4	3396236	1	7.23487	4.72	34.9	1	R.DQGGFGDRNEYGSR.I
*	2016-11-16-hjk-Sharma-Shalini-SL3-mut.19570.19570.2	3.4464	0.6626	100	1079.62	1079.62	1.4	23837102	1	14.7915	6.56	75	4	R.IGGGIDVPVPR.H
*	2016-11-16-hjk-Sharma-Shalini-SL3-mut.9205.9205.2	2.3687	0.4241	100	923.542	923.542	0.1	4780922	1	10.9209	10.06	75	1	R.HSVGVVIGR.S
	2016-11-16-hjk-Sharma-Shalini-SL3-mut.4061.4061.2	2.6784	0.2799	99.9	1000.55	1000.55	1.3	1.98058e+06	1	6.71872	9.08	68.8	1	K.KIQNDAGVR.I
	2016-11-16-hjk-Sharma-Shalini-SL3-mut.4936.4936.2	1.9563	0.3068	99.8	872.459	872.458	0.3	2.08524e+06	1	7.76189	6.56	57.1	1	K.IQNDAGVR.I
*	2016-11-16-hjk-Sharma-Shalini-SL3-mut.11156.11156.2	2.2065	0.4993	99.9	1106.58	1106.58	1	5.20084e+06	1	9.16128	7.33	64.7	1	K.IAHIMGPPDR.C
*	2016-11-16-hjk-Sharma-Shalini-SL3-mut.26345.26345.2	3.1521	0.2427	100	1184.7	1184.7	0.1	13559392	1	8.25981	6.56	72.2	1	R.IINDLLQSLR.S
*	2016-11-16-hjk-Sharma-Shalini-SL3-mut.18946.18946.2	4.0211	0.5215	100	1533.81	1533.8	2	2886448	1	12.0922	6.56	75	4	K.AINQQTGAFVEISR.Q
*	2016-11-16-hjk-Sharma-Shalini-SL3-mut.12649.12649.2	2.4574	0.4572	100	1226.62	1226.62	1.8	2.13506e+06	1	9.8515	6.56	63.2	2	R.QLPPNGDPNFK.L
	2016-11-16-hjk-Sharma-Shalini-SL3-mut.16381.16381.2	1.5931	0.5256	99.9	988.441	988.441	0.1	4700893	1	7.32709	4.46	63.6	1	K.AWEEYYK.K
*	2016-11-16-hjk-Sharma-Shalini-SL3-mut.9612.9612.2	2.5915	0.4161	100	2109.07	2109.07	0.3	1.01398e+06	1	10.6235	8.64	46.4	1	K.KIGQQPQQPGAPPQQDYTK.A
*	2016-11-16-hjk-Sharma-Shalini-SL3-mut.9554.9554.3	4.028	0.5665	100	2109.07	2109.07	0	2.82317e+06	1	10.2469	8.64	50.9	3	K.KIGQQPQQPGAPPQQDYTK.A
*	2016-11-16-hjk-Sharma-Shalini-SL3-mut.11021.11021.2	4.283	0.6881	100	1980.98	1980.98	-0.2	11700132	1	14.8696	6.56	78.6	3	K.IGQQPQQPGAPPQQDYTK.A
*	2016-11-16-hjk-Sharma-Shalini-SL3-mut.24298.24298.2	5.3947	0.7876	100	2952.35	2952.35	-0.3	1.55431e+06	1	20.9087	4.46	60.5	1	K.QAQVATGGGPGAPPGSQPDYSAAWAEYYR.Q
P60709	11	12	0.445	375	41737	5.5	U	0.00349205	1.78612	Actin, cytoplasmic 1 OS=Homo sapiens GN=ACTB PE=1 SV=1	0	12	0
P63261	11	12	0.445	375	41793	5.5	U	0.00349205	1.78612	Actin, cytoplasmic 2 OS=Homo sapiens GN=ACTG1 PE=1 SV=1	0	12	0
	2016-11-16-hjk-Sharma-Shalini-SL3-mut.9119.9119.2	2.522	0.5384	100	976.449	976.448	0.7	2574628	1	9.71318	4.46	76.5	1	K.AGFAGDDAPR.A
	2016-11-16-hjk-Sharma-Shalini-SL3-mut.8428.8428.2	3.7067	0.4851	100	1171.57	1171.57	0	4273414	1	15.3654	9.08	90	1	R.HQGVMVGMGQK.D
	2016-11-16-hjk-Sharma-Shalini-SL3-mut.12869.12869.2	2.2597	0.1223	99.8	800.536	800.535	0.7	8.25037e+06	1	4.79531	10.99	91.7	1	K.RGILTLK.Y
	2016-11-16-hjk-Sharma-Shalini-SL3-mut.15591.15591.3	3.1465	0.4908	100	1516.75	1515.75	-0.8	6334352	1	7.70611	7.41	35.1	1	K.IWHHTFYNELR.V
	2016-11-16-hjk-Sharma-Shalini-SL3-mut.26768.26768.4	3.8586	0.484	100	3184.62	3183.61	-0.7	1998724	1	9.11198	5.52	15.1	1	R.TTGIVMDSGDGVTHTVPIYEGYALPHAILR.L
	2016-11-16-hjk-Sharma-Shalini-SL3-mut.25175.25175.2	1.5982	0.4475	99.4	998.487	998.486	0.5	2.32823e+06	1	8.54319	4.46	57.1	1	R.DLTDYLMK.I
	2016-11-16-hjk-Sharma-Shalini-SL3-mut.13887.13887.2	2.2231	0.6104	100	1132.53	1132.53	-0.2	5.4544e+06	1	12.1946	6.56	66.7	1	R.GYSFTTTAER.E
	2016-11-16-hjk-Sharma-Shalini-SL3-mut.25466.25466.2	3.6181	0.6193	100	1790.9	1790.89	2.7	5089786	1	13.506	4.14	72	2	K.SYELPDGQVITIGNER.F
	2016-11-16-hjk-Sharma-Shalini-SL3-mut.29804.29804.4	3.4192	0.4354	99.9	3535.64	3534.63	1.2	4844418	1	7.27126	5.8	17.7	1	R.FRCPEALFQPSFLGMESCGIHETTFNSIMK.C
	2016-11-16-hjk-Sharma-Shalini-SL3-mut.27285.27285.2	4.7809	0.5844	100	2215.07	2215.07	-0.1	2.12684e+06	1	14.2994	4.46	62.5	1	K.DLYANTVLSGGTTMYPGIADR.M
	2016-11-16-hjk-Sharma-Shalini-SL3-mut.11475.11475.3	2.6323	0.5326	99.9	1516.71	1516.7	2.2	2371072	1	9.501	4.72	36.8	1	K.QEYDESGPSIVHR.K
P08107	22	26	0.44	641	70052	5.6	U	0.00442634	1.75423	Heat shock 70 kDa protein 1A/1B OS=Homo sapiens GN=HSPA1A PE=1 SV=5	0	26	0
*	2016-11-16-hjk-Sharma-Shalini-SL3-mut.25507.25507.3	6.0259	0.1226	99.2	2265.14	2265.13	1.4	5.03215e+06	1	14.0009	7.11	46.3	1	K.AAAIGIDLGTTYSCVGVFQHGK.V
	2016-11-16-hjk-Sharma-Shalini-SL3-mut.19085.19085.2	3.0956	0.6197	100	1487.7	1487.7	1.6	7.17242e+06	1	12.2266	4.46	65.2	2	R.TTPSYVAFTDTER.L
*	2016-11-16-hjk-Sharma-Shalini-SL3-mut.19973.19973.2	4.2369	0.5838	100	1658.85	1658.85	-1.5	3.63948e+06	1	10.5908	6.56	72	2	K.NQVALNPQNTVFDAK.R
*	2016-11-16-hjk-Sharma-Shalini-SL3-mut.13201.13201.2	4.1145	0.5413	100	1350.67	1350.67	1.2	3.14768e+06	1	9.57943	6.56	86.4	1	R.KFGDPVVQSDMK.H
*	2016-11-16-hjk-Sharma-Shalini-SL3-mut.19174.19174.3	3.7679	0.6558	100	1680.85	1680.85	0.3	6.5104e+06	1	12.3205	7.33	45.5	3	K.HWPFQVINDGDKPK.V
	2016-11-16-hjk-Sharma-Shalini-SL3-mut.28953.28953.2	2.7668	0.5868	100	1614.81	1614.81	0.5	8480169	1	13.4537	4.46	56.5	1	K.AFYPEEISSMVLTK.M
	2016-11-16-hjk-Sharma-Shalini-SL3-mut.26281.26281.2	3.3227	0.4857	100	1197.69	1197.69	-1	31908600	1	11.4632	6.56	71.4	1	K.DAGVIAGLNVLR.I
	2016-11-16-hjk-Sharma-Shalini-SL3-mut.25533.25533.2	4.6777	0.599	100	1687.9	1687.9	0.6	17991966	1	13.6061	4.46	63.3	1	R.IINEPTAAAIAYGLDR.T
	2016-11-16-hjk-Sharma-Shalini-SL3-mut.11865.11865.2	4.5747	0.7475	100	1676.73	1675.73	-2.7	4320730	1	16.3318	4.4	84.6	1	K.ATAGDTHLGGEDFDNR.L
	2016-11-16-hjk-Sharma-Shalini-SL3-mut.23890.23890.2	4.6609	0.6141	100	1542.74	1542.74	-0.9	6236116	1	12.2058	4.72	90	1	R.ARFEELCSDLFR.S
	2016-11-16-hjk-Sharma-Shalini-SL3-mut.23886.23886.3	2.4127	0.5105	99.8	1542.74	1542.74	-0.6	2.4422e+06	1	8.4035	4.72	51.5	1	R.ARFEELCSDLFR.S
	2016-11-16-hjk-Sharma-Shalini-SL3-mut.25196.25196.2	2.8433	0.606	100	1315.6	1315.6	0.5	6.66036e+06	1	10.7005	4.14	66.7	1	R.FEELCSDLFR.S
*	2016-11-16-hjk-Sharma-Shalini-SL3-mut.17879.17879.2	3.9848	0.6449	100	1465.81	1465.81	-1.1	7456153	1	15.3007	7.33	82.6	1	K.AQIHDLVLVGGSTR.I
*	2016-11-16-hjk-Sharma-Shalini-SL3-mut.24598.24598.2	2.3357	0.4662	100	1109.57	1109.57	0.7	5.05011e+06	1	10.535	6.56	68.8	1	K.LLQDFFNGR.D
	2016-11-16-hjk-Sharma-Shalini-SL3-mut.28696.28696.2	4.4155	0.6902	100	2786.37	2786.36	2.6	680346	1	15.8211	4.14	35.3	1	K.QTQIFTTYSDNQPGVLIQVYEGER.A
	2016-11-16-hjk-Sharma-Shalini-SL3-mut.11442.11442.2	1.7248	0.2656	99.1	801.422	801.421	0.8	2.56182e+06	1	5.61961	6.56	58.3	1	K.DNNLLGR.F
	2016-11-16-hjk-Sharma-Shalini-SL3-mut.5758.5758.2	2.4262	0.5445	100	1137.55	1137.55	-0.5	4.83869e+06	1	10.2573	4.72	75	1	K.YKAEDEVQR.E
	2016-11-16-hjk-Sharma-Shalini-SL3-mut.22797.22797.2	2.8686	0.7399	100	1287.6	1287.6	0.1	7.12277e+06	1	19.3556	6.56	60	1	K.NALESYAFNMK.S
*	2016-11-16-hjk-Sharma-Shalini-SL3-mut.8147.8147.2	1.8059	0.4062	99.7	947.468	947.468	-0.2	6327307	1	7.83421	4.14	66.7	1	K.SAVEDEGLK.G
*	2016-11-16-hjk-Sharma-Shalini-SL3-mut.26164.26164.3	6.0781	0.6398	100	2662.26	2662.25	4.7	7.32982e+06	1	11.6511	4.42	35.3	1	K.CQEVISWLDANTLAEKDEFEHK.R
*	2016-11-16-hjk-Sharma-Shalini-SL3-mut.26149.26149.4	4.9475	0.5357	100	2662.25	2662.25	1.3	7.29959e+06	1	11.7597	4.42	28	1	K.CQEVISWLDANTLAEKDEFEHK.R
*	2016-11-16-hjk-Sharma-Shalini-SL3-mut.28824.28824.2	6.5369	0.7298	100	3056.52	3055.49	6.2	790750	1	19.865	4.46	40	1	K.ELEQVCNPIISGLYQGAGGPGPGGFGAQGPK.G
Q07955	11	13	0.435	248	27745	10.4	U	0.00572034	1.7227	Splicing factor, arginine/serine-rich 1 OS=Homo sapiens GN=SFRS1 PE=1 SV=2	0	13	0
*	2016-11-16-hjk-Sharma-Shalini-SL3-mut.21303.21303.2	2.7016	0.572	100	1256.7	1256.7	1.3	1.97013e+06	1	9.58416	6.56	75	3	R.IYVGNLPPDIR.T
*	2016-11-16-hjk-Sharma-Shalini-SL3-mut.23100.23100.2	1.7589	0.5411	99.3	1028.5	1028.49	2.7	2.45174e+06	1	10.1269	4.14	66.7	1	K.DIEDVFYK.Y
*	2016-11-16-hjk-Sharma-Shalini-SL3-mut.29315.29315.3	3.2868	0.623	100	2541.17	2541.17	0.6	4322421	1	12.1742	4.12	38.1	1	R.GGPPFAFVEFEDPRDAEDAVYGR.D
*	2016-11-16-hjk-Sharma-Shalini-SL3-mut.14120.14120.2	1.9238	0.4644	99.5	1123.43	1123.43	-2.1	6318113	1	6.00726	4.14	62.5	1	R.DGYDYDGYR.L
*	2016-11-16-hjk-Sharma-Shalini-SL3-mut.23902.23902.2	2.436	0.4671	99.4	1668.9	1668.9	3.7	2.29966e+06	1	9.36482	6.56	46.2	1	R.VVVSGLPPSGSWQDLK.D
*	2016-11-16-hjk-Sharma-Shalini-SL3-mut.16698.16698.2	3.2199	0.6022	100	1417.6	1417.61	-1	10755953	1	10.6179	4.14	63.6	1	R.EAGDVCYADVYR.D
*	2016-11-16-hjk-Sharma-Shalini-SL3-mut.25670.25670.3	3.9345	0.6086	100	2477.14	2477.14	-1.5	2.52822e+06	1	13.2916	4.25	37.7	1	R.EAGDVCYADVYRDGTGVVEFVR.K
*	2016-11-16-hjk-Sharma-Shalini-SL3-mut.19810.19810.2	2.6034	0.4658	100	1078.55	1078.55	-0.3	6.81331e+06	1	9.16487	4.46	66.7	1	R.DGTGVVEFVR.K
*	2016-11-16-hjk-Sharma-Shalini-SL3-mut.15410.15410.2	3.5521	0.5146	100	1206.65	1206.65	-0.6	7098144	1	10.0125	6.56	73.7	1	R.DGTGVVEFVRK.E
*	2016-11-16-hjk-Sharma-Shalini-SL3-mut.12290.12290.2	2.3333	0.4136	100	984.447	984.446	1.2	2549716	1	9.19053	4.46	71.4	1	K.EDMTYAVR.K
*	2016-11-16-hjk-Sharma-Shalini-SL3-mut.7350.7350.2	1.9906	0.5475	100	1162.55	1162.55	0.1	2.3027e+06	1	14.6997	5.63	73.3	1	R.SHEGETAYIR.V
Q16576	14	14	0.431	425	47820	5	U	0.00359475	1.69774	Histone-binding protein RBBP7 OS=Homo sapiens GN=RBBP7 PE=1 SV=1	0	14	0
*	2016-11-16-hjk-Sharma-Shalini-SL3-mut.16656.16656.2	2.6414	0.5616	100	1284.54	1284.54	-0.6	4.84495e+06	1	8.41369	3.86	61.1	1	K.EMFEDTVEER.V
*	2016-11-16-hjk-Sharma-Shalini-SL3-mut.25520.25520.4	7.6004	0.6263	100	2774.4	2774.4	1.3	8801986	1	14.8631	6.22	33.3	1	K.DYALHWLVLGTHTSDEQNHLVVAR.V
*	2016-11-16-hjk-Sharma-Shalini-SL3-mut.12670.12670.3	3.5021	0.8144	100	2170.9	2170.91	-5.4	2.29714e+06	1	12.8031	4.58	36.8	1	R.VHIPNDDAQFDASHCDSDK.G
*	2016-11-16-hjk-Sharma-Shalini-SL3-mut.19654.19654.4	3.1881	0.55	100	3294.44	3294.44	0.8	1.49544e+06	1	10.1024	4.7	13.5	1	R.VHIPNDDAQFDASHCDSDKGEFGGFGSVTGK.I
*	2016-11-16-hjk-Sharma-Shalini-SL3-mut.19189.19189.2	2.3494	0.6311	100	1142.55	1142.55	0	2408912	1	11.6319	6.56	65	1	K.GEFGGFGSVTGK.I
	2016-11-16-hjk-Sharma-Shalini-SL3-mut.24051.24051.2	4.2805	0.6017	100	1471.73	1471.73	1.4	13052626	1	14.5283	4.46	81.8	1	K.TPSSDVLVFDYTK.H
*	2016-11-16-hjk-Sharma-Shalini-SL3-mut.6585.6585.2	3.6156	0.553	100	1789.83	1789.83	1.4	1.91504e+06	1	10.9127	5.8	50	1	K.HPAKPDPSGECNPDLR.L
	2016-11-16-hjk-Sharma-Shalini-SL3-mut.22398.22398.2	1.8375	0.3223	99.7	934.481	934.481	-0.6	4.52333e+06	1	6.44797	6.56	66.7	1	K.LMIWDTR.S
*	2016-11-16-hjk-Sharma-Shalini-SL3-mut.27691.27691.4	4.8499	0.4817	99.8	4109.95	4108.96	-3.1	1.32639e+06	1	9.08534	5.63	11.2	1	R.SNTTSKPSHLVDAHTAEVNCLSFNPYSEFILATGSADK.T
	2016-11-16-hjk-Sharma-Shalini-SL3-mut.25016.25016.2	2.2271	0.3388	99.8	973.548	973.547	1.9	3.48296e+06	1	8.0748	6.56	71.4	1	K.TVALWDLR.N
	2016-11-16-hjk-Sharma-Shalini-SL3-mut.19462.19462.2	3.033	0.3681	100	1130.63	1130.63	0.4	4598918	1	7.20799	9.08	87.5	1	R.RLNVWDLSK.I
	2016-11-16-hjk-Sharma-Shalini-SL3-mut.23462.23462.2	2.3087	0.4721	100	974.531	974.53	0.8	2.94108e+06	1	8.10627	6.56	71.4	1	R.LNVWDLSK.I
*	2016-11-16-hjk-Sharma-Shalini-SL3-mut.22411.22411.3	4.1209	0.4879	100	2847.34	2847.34	0.2	3336992	1	9.37343	4.28	32.5	1	K.IGEEQSAEDAEDGPPELLFIHGGHTAK.I
*	2016-11-16-hjk-Sharma-Shalini-SL3-mut.22383.22383.4	3.6335	0.4257	99.8	2847.34	2847.34	-1	4.59641e+06	1	8.27173	4.28	20.5	1	K.IGEEQSAEDAEDGPPELLFIHGGHTAK.I
P50990	25	26	0.427	548	59621	5.6	U	0.00517753	1.67301	T-complex protein 1 subunit theta OS=Homo sapiens GN=CCT8 PE=1 SV=4	0	26	0
*	2016-11-16-hjk-Sharma-Shalini-SL3-mut.20940.20940.2	2.336	0.4605	100	962.512	962.513	-0.6	2698621	1	7.02462	9.08	80	2	K.APGFAQMLK.E
*	2016-11-16-hjk-Sharma-Shalini-SL3-mut.16827.16827.2	3.1484	0.6966	100	1307.63	1307.64	-3.4	13568970	1	18.8183	5.63	95	1	K.HFSGLEEAVYR.N
*	2016-11-16-hjk-Sharma-Shalini-SL3-mut.24701.24701.2	3.6747	0.5359	100	1333.75	1333.75	1.2	8.05172e+06	1	10.9486	6.56	68.2	1	K.LFVTNDAATILR.E
*	2016-11-16-hjk-Sharma-Shalini-SL3-mut.6616.6616.2	2.4868	0.5061	100	1121.6	1121.6	0.5	2650700	1	9.40303	5.63	61.1	1	R.ELEVQHPAAK.M
*	2016-11-16-hjk-Sharma-Shalini-SL3-mut.19013.19013.2	4.2207	0.5893	100	1611.8	1611.8	1.4	2.08073e+06	1	15.9127	7.16	78.3	1	K.AHEILPNLVCCSAK.N
*	2016-11-16-hjk-Sharma-Shalini-SL3-mut.18999.18999.3	2.335	0.5841	99.9	1611.8	1611.8	1.8	4.15116e+06	1	9.04017	7.16	46.2	1	K.AHEILPNLVCCSAK.N
*	2016-11-16-hjk-Sharma-Shalini-SL3-mut.25133.25133.3	3.0653	0.5289	100	1529.83	1529.83	0.8	1.94554e+06	1	8.88217	4.72	35.7	1	K.NLRDIDEVSSLLR.T
*	2016-11-16-hjk-Sharma-Shalini-SL3-mut.25378.25378.2	2.2617	0.2448	99.5	1146.6	1146.6	1.5	6.48821e+06	1	7.69269	4.14	61.1	1	R.DIDEVSSLLR.T
*	2016-11-16-hjk-Sharma-Shalini-SL3-mut.25628.25628.2	4.5356	0.7359	100	1831.86	1831.86	0.3	6.07433e+06	1	17.0434	4.46	60	1	K.IAVYSCPFDGMITETK.G
*	2016-11-16-hjk-Sharma-Shalini-SL3-mut.19482.19482.2	3.2297	0.6305	100	1169.55	1169.55	1.5	6.28482e+06	1	14.6257	4.46	72.2	1	K.TAEELMNFSK.G
*	2016-11-16-hjk-Sharma-Shalini-SL3-mut.14799.14799.2	3.0491	0.6512	100	1233.58	1233.58	2.5	3678940	1	12.2742	4.14	72.2	1	K.GEENLMDAQVK.A
*	2016-11-16-hjk-Sharma-Shalini-SL3-mut.14499.14499.2	3.5113	0.6194	100	1372.75	1372.74	1.6	5.7964e+06	1	13.0337	6.56	65.4	1	K.AIADTGANVVVTGGK.V
*	2016-11-16-hjk-Sharma-Shalini-SL3-mut.20711.20711.2	1.8112	0.3932	99.6	908.503	908.502	1.2	4.08576e+06	1	8.14811	9.08	66.7	1	K.YNIMLVR.L
*	2016-11-16-hjk-Sharma-Shalini-SL3-mut.21201.21201.2	2.8561	0.494	100	1173.65	1173.65	0.4	11664501	1	8.85395	4.46	65	1	K.EDGAISTIVLR.G
*	2016-11-16-hjk-Sharma-Shalini-SL3-mut.21282.21282.2	3.3949	0.6237	100	1365.6	1365.6	0.5	4456126	1	10.4554	3.96	70	1	R.GSTDNLMDDIER.A
*	2016-11-16-hjk-Sharma-Shalini-SL3-mut.12789.12789.2	2.3466	0.5841	100	1065.52	1065.52	0.7	3568601	1	11.5761	4.46	64.7	1	R.AVDDGVNTFK.V
*	2016-11-16-hjk-Sharma-Shalini-SL3-mut.16765.16765.2	4.2537	0.3585	100	1510.86	1510.86	0.2	4278532	1	7.5632	6.56	53.6	1	K.RLVPGGGATEIELAK.Q
*	2016-11-16-hjk-Sharma-Shalini-SL3-mut.16752.16752.3	3.8887	0.6074	100	1510.86	1510.86	0.4	2.87184e+06	1	12.3453	6.56	43.5	1	K.RLVPGGGATEIELAK.Q
*	2016-11-16-hjk-Sharma-Shalini-SL3-mut.18843.18843.2	2.4931	0.5774	100	1354.76	1354.76	0.9	1.94577e+06	1	9.81298	4.46	54.2	1	R.LVPGGGATEIELAK.Q
*	2016-11-16-hjk-Sharma-Shalini-SL3-mut.22191.22191.2	5.4653	0.5682	100	2057.98	2057.98	-3.1	3553110	1	16.5706	4.46	71.9	1	K.QITSYGETCPGLEQYAIK.K
*	2016-11-16-hjk-Sharma-Shalini-SL3-mut.19118.19118.3	5.472	0.5736	100	2186.08	2186.08	-1.1	2.81535e+06	1	11.9464	6.56	36.1	1	K.QITSYGETCPGLEQYAIKK.F
*	2016-11-16-hjk-Sharma-Shalini-SL3-mut.22102.22102.2	2.8435	0.5864	100	1150.59	1150.59	2.1	3.13167e+06	1	11.5954	4.46	66.7	1	K.FAEAFEAIPR.A
*	2016-11-16-hjk-Sharma-Shalini-SL3-mut.6165.6165.2	2.1334	0.5654	100	1158.59	1158.59	1.9	1.78302e+06	1	9.31112	7.33	72.2	1	K.LYAVHQEGNK.N
*	2016-11-16-hjk-Sharma-Shalini-SL3-mut.17466.17466.2	3.2572	0.4632	100	1128.68	1128.67	1.5	3.59219e+06	1	10.4637	10.06	70	1	K.LATNAAVTVLR.V
*	2016-11-16-hjk-Sharma-Shalini-SL3-mut.13502.13502.2	2.1534	0.4406	99.9	917.512	917.512	-0.7	4864757	1	7.61214	6.56	69.2	1	R.VDQIIMAK.P
Q7Z2W4	32	35	0.426	902	101431	8.4	U	0.0042344	1.66686	Zinc finger CCCH-type antiviral protein 1 OS=Homo sapiens GN=ZC3HAV1 PE=1 SV=3	0	35	0
*	2016-11-16-hjk-Sharma-Shalini-SL3-mut.21090.21090.2	3.4869	0.521	100	1448.78	1448.77	0.6	5.28578e+06	1	10.7207	4.46	62.5	1	R.FVVLETGGEAGITR.S
*	2016-11-16-hjk-Sharma-Shalini-SL3-mut.14458.14458.2	3.6226	0.47	100	1481.69	1481.69	1.8	3953642	1	12.998	4.72	89.5	1	K.YSHEVLSEENFK.V
*	2016-11-16-hjk-Sharma-Shalini-SL3-mut.6529.6529.2	2.0967	0.535	99.9	1011.52	1011.52	0.8	7.39862e+06	1	8.75906	7.33	62.5	1	K.NHELSGLNK.E
*	2016-11-16-hjk-Sharma-Shalini-SL3-mut.7028.7028.2	3.692	0.7328	100	1515.68	1515.68	1.4	2341636	1	18.5615	8.04	75	3	R.QQICNQQPPCSR.L
*	2016-11-16-hjk-Sharma-Shalini-SL3-mut.21983.21983.2	4.7244	0.6376	100	2180.03	2180.04	-5.9	1.13313e+06	1	14.0346	4.72	56.7	1	R.EHGLNPDVVQNIQDICNSK.H
*	2016-11-16-hjk-Sharma-Shalini-SL3-mut.21937.21937.3	5.85	0.5653	100	2180.04	2180.04	0.6	6.30697e+06	1	11.0479	4.72	47.4	1	R.EHGLNPDVVQNIQDICNSK.H
*	2016-11-16-hjk-Sharma-Shalini-SL3-mut.24261.24261.2	5.3469	0.7523	100	1932.91	1932.91	-0.3	4093403	1	17.3432	4.46	75	1	R.FFQGSQEFLASASASAER.S
*	2016-11-16-hjk-Sharma-Shalini-SL3-mut.19808.19808.2	2.8985	0.4457	100	1401.69	1401.69	0.6	6330152	1	11.054	3.96	75	1	R.ASLEDAPVDDLTR.K
*	2016-11-16-hjk-Sharma-Shalini-SL3-mut.16952.16952.2	2.46	0.352	99.5	1529.78	1529.78	-2.4	3842481	1	6.59678	4.4	68.2	1	R.ASLEDAPVDDLTRK.F
*	2016-11-16-hjk-Sharma-Shalini-SL3-mut.14474.14474.2	1.8819	0.4979	99.5	1086.52	1086.52	2.2	6402885	1	8.88096	6.56	56.2	1	K.FTYLGSQDR.A
*	2016-11-16-hjk-Sharma-Shalini-SL3-mut.6619.6619.2	3.8195	0.5786	100	1449.69	1449.69	-0.3	3314531	1	12.8726	6.56	65.4	1	K.ATDLGGTSQAGTSQR.F
*	2016-11-16-hjk-Sharma-Shalini-SL3-mut.24201.24201.3	7.3662	0.6559	100	3334.57	3334.56	1.2	5.46058e+06	1	14.9429	4.72	27.5	2	R.FLENGSQEDLLHGNPGSTYLASNSTSAPNWK.S
*	2016-11-16-hjk-Sharma-Shalini-SL3-mut.15800.15800.2	2.9301	0.5214	100	1335.63	1335.63	1.4	4.70353e+06	1	10.136	6.56	57.9	1	K.SLTSWTNDQGAR.R
*	2016-11-16-hjk-Sharma-Shalini-SL3-mut.17806.17806.2	3.4784	0.4904	100	1546.81	1546.81	1.9	2.90199e+06	1	8.33683	6.56	75	1	R.SSLGSLQTPEAVTTR.K
*	2016-11-16-hjk-Sharma-Shalini-SL3-mut.14986.14986.2	4.3063	0.4805	100	1674.9	1674.9	1.2	1.45203e+06	1	9.66966	9.08	73.1	1	R.SSLGSLQTPEAVTTRK.G
*	2016-11-16-hjk-Sharma-Shalini-SL3-mut.15761.15761.2	2.4438	0.5691	100	1068.53	1068.53	0	4716010	1	12.0243	6.56	75	1	K.GTGLLSSDYR.I
*	2016-11-16-hjk-Sharma-Shalini-SL3-mut.25216.25216.2	6.6431	0.7144	100	2789.32	2789.33	-4.1	2.10181e+06	1	19.4561	4.14	56.4	1	K.SGTQDIQPGPLFNNNADGVATDITSTR.S
*	2016-11-16-hjk-Sharma-Shalini-SL3-mut.21098.21098.2	5.092	0.647	100	1851.93	1851.93	0.6	6124914	1	17.4692	4.46	72.4	1	R.VALVNDSLSDVTSTTSSR.V
*	2016-11-16-hjk-Sharma-Shalini-SL3-mut.16106.16106.3	5.755	0.6799	100	1984.83	1984.84	-2.9	4987619	1	12.2232	4.42	56.9	1	R.VDDHDSEEICLDHLCK.G
*	2016-11-16-hjk-Sharma-Shalini-SL3-mut.21613.21613.2	1.8885	0.4533	99.7	875.482	875.481	1.9	4.07741e+06	1	8.09461	9.08	81.8	1	R.WQMLIGK.T
*	2016-11-16-hjk-Sharma-Shalini-SL3-mut.22601.22601.2	4.6476	0.6001	100	1666.74	1666.74	0.3	3.75419e+06	1	10.8447	4.4	91.3	1	K.TWTDFEHMETIEK.G
*	2016-11-16-hjk-Sharma-Shalini-SL3-mut.22578.22578.3	3.4244	0.4	99.4	1666.75	1666.74	2.5	3291781	1	8.0214	4.4	32.5	1	K.TWTDFEHMETIEK.G
*	2016-11-16-hjk-Sharma-Shalini-SL3-mut.16268.16268.3	3.735	0.4678	99.8	1866	1865	-1.8	2.58172e+06	1	9.28418	10.04	34.8	1	R.LSTPSSVTKPANSVFTTK.W
*	2016-11-16-hjk-Sharma-Shalini-SL3-mut.10817.10817.2	1.7583	0.3962	99.4	964.511	964.51	1.1	1.66262e+06	1	7.74089	9.08	53.3	1	K.PANSVFTTK.W
*	2016-11-16-hjk-Sharma-Shalini-SL3-mut.18516.18516.2	3.6825	0.4934	100	1540.69	1540.69	-2.4	2.18997e+06	1	12.5579	4.14	70.8	1	K.NESGTWIQYGEEK.D
*	2016-11-16-hjk-Sharma-Shalini-SL3-mut.24223.24223.2	6.2807	0.7841	100	2118.93	2118.94	-2.2	4991600	1	19.4139	4.46	80	1	K.NSNVDSSYLESLYQSCPR.G
*	2016-11-16-hjk-Sharma-Shalini-SL3-mut.15319.15319.2	2.1312	0.382	99.4	1017.54	1017.55	-2.8	5.52533e+06	1	8.33683	10.06	62.5	1	R.GVVPFQAGSR.N
*	2016-11-16-hjk-Sharma-Shalini-SL3-mut.23647.23647.2	5.3461	0.5067	100	1807.94	1807.93	3.6	2.77418e+06	1	9.69337	9.98	69.2	1	R.RPTFVPQWYVQQMK.R
*	2016-11-16-hjk-Sharma-Shalini-SL3-mut.23634.23634.3	2.6249	0.5075	99	1807.94	1807.93	3.2	3.14314e+06	1	8.87146	9.98	38	1	R.RPTFVPQWYVQQMK.R
*	2016-11-16-hjk-Sharma-Shalini-SL3-mut.10661.10661.3	3.0072	0.5996	100	1629.85	1629.85	0.7	1.3069e+06	1	9.20134	6.77	44.2	1	K.LSEIHHLHPEYVR.V
*	2016-11-16-hjk-Sharma-Shalini-SL3-mut.26714.26714.2	2.6831	0.6005	100	1265.69	1265.69	-0.5	3540532	1	10.9254	9.08	76.5	1	R.SNPSVFVIFQK.D
*	2016-11-16-hjk-Sharma-Shalini-SL3-mut.25211.25211.2	4.4675	0.6495	100	1889.88	1889.88	-0.3	2903479	1	14.3554	3.96	65.4	1	K.DQVYPQYVIEYTEDK.A
O60506	24	34	0.425	623	69603	8.6	U	0.00595553	1.66073	Heterogeneous nuclear ribonucleoprotein Q OS=Homo sapiens GN=SYNCRIP PE=1 SV=2	0	34	0
*	2016-11-16-hjk-Sharma-Shalini-SL3-mut.26302.26302.3	4.3279	0.508	100	2015.01	2015.01	-1.1	2.74289e+06	1	10.7603	4.25	28.8	1	K.LDEIYVAGLVAHSDLDER.A
*	2016-11-16-hjk-Sharma-Shalini-SL3-mut.5330.5330.2	3.7427	0.6273	100	1142.55	1142.54	1.3	2.01875e+06	1	13.0233	5.63	88.2	1	K.DSDLSHVQNK.S
	2016-11-16-hjk-Sharma-Shalini-SL3-mut.20734.20734.2	1.8843	0.5726	100	1012.5	1012.5	1.5	5081365	1	10.5972	8.26	66.7	2	K.SAFLCGVMK.T
	2016-11-16-hjk-Sharma-Shalini-SL3-mut.16100.16100.2	3.2265	0.7136	100	1311.65	1311.65	-0.9	12946586	1	16.2668	6.56	63.6	1	R.TGYTLDVTTGQR.K
	2016-11-16-hjk-Sharma-Shalini-SL3-mut.12852.12852.2	2.5471	0.4369	100	1439.75	1439.75	1.7	6.8783e+06	1	11.1571	8.8	80	1	R.TGYTLDVTTGQRK.Y
*	2016-11-16-hjk-Sharma-Shalini-SL3-mut.24401.24401.2	6.3661	0.7172	100	2566.25	2566.25	1.9	5.66021e+06	1	18.8341	4.46	67.6	3	K.YGGPPPDSVYSGQQPSVGTEIFVGK.I
	2016-11-16-hjk-Sharma-Shalini-SL3-mut.22713.22713.2	2.0328	0.2214	99.3	927.503	927.505	-1.5	5.85277e+06	1	8.21042	6.56	84.6	2	K.AGPIWDLR.L
*	2016-11-16-hjk-Sharma-Shalini-SL3-mut.25457.25457.2	2.9725	0.5783	100	1260.65	1260.64	1.5	5561847	1	11.0563	6.56	57.9	2	R.LMMDPLTGLNR.G
*	2016-11-16-hjk-Sharma-Shalini-SL3-mut.23074.23074.2	2.6086	0.5487	100	1193.57	1193.57	-0.3	2.67898e+06	1	18.124	8.26	73.3	2	R.GYAFVTFCTK.E
*	2016-11-16-hjk-Sharma-Shalini-SL3-mut.6671.6671.2	2.0493	0.5122	99.9	1058.54	1058.54	0.9	6.67705e+06	1	9.08602	7.33	64.3	1	K.LYNNHEIR.S
*	2016-11-16-hjk-Sharma-Shalini-SL3-mut.20930.20930.2	2.655	0.3653	100	1122.57	1122.57	1	5.57586e+06	1	7.54941	4.14	66.7	1	K.EQILEEFSK.V
*	2016-11-16-hjk-Sharma-Shalini-SL3-mut.22624.22624.2	7.0125	0.7383	100	1942.98	1942.98	2.5	6.38836e+06	1	15.0735	4.4	93.1	1	K.VTEGLTDVILYHQPDDK.K
*	2016-11-16-hjk-Sharma-Shalini-SL3-mut.22606.22606.3	3.9101	0.5811	100	1942.98	1942.98	1.1	13298231	1	10.7996	4.4	39.6	1	K.VTEGLTDVILYHQPDDK.K
*	2016-11-16-hjk-Sharma-Shalini-SL3-mut.20317.20317.4	2.5528	0.3114	99	2071.07	2071.07	0	648847	1	5.91956	4.89	14.7	1	K.VTEGLTDVILYHQPDDKK.K
	2016-11-16-hjk-Sharma-Shalini-SL3-mut.22232.22232.2	3.0906	0.7505	100	1444.62	1444.62	-0.9	9682235	1	14.4639	4.72	76.5	1	R.GFCFLEYEDHK.T
	2016-11-16-hjk-Sharma-Shalini-SL3-mut.22227.22227.3	1.6763	0.7113	100	1444.62	1444.62	-0.7	3.78696e+06	1	10.5339	4.72	29	1	R.GFCFLEYEDHK.T
*	2016-11-16-hjk-Sharma-Shalini-SL3-mut.29791.29791.2	5.663	0.7205	100	2654.25	2654.24	2.9	1.87765e+06	1	19.7276	3.8	48.9	1	K.VWGNVGTVEWADPIEDPDPEVMAK.V
*	2016-11-16-hjk-Sharma-Shalini-SL3-mut.27308.27308.2	3.7047	0.6569	100	1473.78	1473.78	2.7	28584272	1	12.3953	4.14	70.8	1	R.NLANTVTEEILEK.A
*	2016-11-16-hjk-Sharma-Shalini-SL3-mut.23384.23384.2	3.3265	0.687	100	1312.6	1312.6	1.8	11161623	1	15.9007	4.72	83.3	2	K.DYAFIHFDER.D
*	2016-11-16-hjk-Sharma-Shalini-SL3-mut.21552.21552.3	3.6134	0.5102	100	1782.85	1782.84	1	12239564	1	10.5882	4.89	42.6	1	K.DYAFIHFDERDGAVK.A
*	2016-11-16-hjk-Sharma-Shalini-SL3-mut.25050.25050.2	6.5284	0.5937	100	2042.05	2042.04	1	5.23663e+06	1	13.0212	4.25	87.1	2	K.DLEGENIEIVFAKPPDQK.R
*	2016-11-16-hjk-Sharma-Shalini-SL3-mut.24971.24971.3	4.1476	0.5466	100	2042.05	2042.04	1.6	5658721	1	10.7597	4.25	43.3	3	K.DLEGENIEIVFAKPPDQK.R
*	2016-11-16-hjk-Sharma-Shalini-SL3-mut.17452.17452.3	6.2362	0.7089	100	3187.46	3187.46	1.5	3.48984e+06	1	15.3466	7.25	35.7	1	R.QTNNQNWGSQPIAQQPLQGGDHSGNYGYK.S
*	2016-11-16-hjk-Sharma-Shalini-SL3-mut.24081.24081.2	4.4956	0.6871	100	2034.89	2034.88	1.8	3.41258e+06	1	13.7308	4.14	75	1	K.SENQEFYQDTFGQQWK.-
P11142	28	47	0.424	646	70898	5.5	U	0.00793954	1.65461	Heat shock cognate 71 kDa protein OS=Homo sapiens GN=HSPA8 PE=1 SV=1	0	47	0
*	2016-11-16-hjk-Sharma-Shalini-SL3-mut.24655.24655.2	5.7756	0.7505	100	2263.12	2263.12	3.2	1.51499e+06	1	20.8497	7.11	61.1	1	K.GPAVGIDLGTTYSCVGVFQHGK.V
*	2016-11-16-hjk-Sharma-Shalini-SL3-mut.24626.24626.3	5.8166	0.7301	100	2263.12	2263.12	1	3.91557e+06	1	18.1318	7.11	53.7	2	K.GPAVGIDLGTTYSCVGVFQHGK.V
	2016-11-16-hjk-Sharma-Shalini-SL3-mut.19085.19085.2	3.0956	0.6197	100	1487.7	1487.7	1.6	7.17242e+06	1	12.2266	4.46	65.2	2	R.TTPSYVAFTDTER.L
*	2016-11-16-hjk-Sharma-Shalini-SL3-mut.19492.19492.2	4.2813	0.7253	100	1649.8	1649.8	0.6	25436838	1	18.3162	6.56	72	2	K.NQVAMNPTNTVFDAK.R
*	2016-11-16-hjk-Sharma-Shalini-SL3-mut.14014.14014.2	4.4564	0.3965	100	1410.67	1410.67	-0.6	5.15669e+06	1	11.4416	4.72	90.9	2	R.RFDDAVVQSDMK.H
*	2016-11-16-hjk-Sharma-Shalini-SL3-mut.20199.20199.3	4.2631	0.6677	100	1653.83	1653.83	-0.2	8514787	1	14.5824	9.08	40	4	K.HWPFMVVNDAGRPK.V
*	2016-11-16-hjk-Sharma-Shalini-SL3-mut.26478.26478.2	3.1426	0.5756	100	1617.79	1616.79	-2.8	7956809	1	14.7096	4.46	56.5	3	K.SFYPEEVSSMVLTK.M
*	2016-11-16-hjk-Sharma-Shalini-SL3-mut.15798.15798.2	1.7358	0.3896	99.4	993.524	993.525	-0.7	26087238	1	9.02432	4.46	76.9	1	K.EIAEAYLGK.T
*	2016-11-16-hjk-Sharma-Shalini-SL3-mut.23858.23858.2	4.7252	0.5169	100	1982	1982	-1	3618770	1	11.8413	6.56	58.1	4	K.TVTNAVVTVPAYFNDSQR.Q
*	2016-11-16-hjk-Sharma-Shalini-SL3-mut.24184.24184.2	3.2021	0.4074	100	1199.67	1199.67	-0.3	10878229	1	10.4284	6.56	72.7	2	K.DAGTIAGLNVLR.I
[truncated: 2,805 more rows]

## Sheet: Table S5
Table S5: Sequence of oligonucleotides and small interfering RNAs used in this study.
[truncated: 21 more rows]

## Sheet: Table S6
Table S6: Sequence of primers used in this study to mutate stem-loops 3 and 4 of U1-5a snRNA.
[truncated: 26 more rows]
